# Supplementary material for: Transcriptome Analysis of Tomato Flower Pedicel Tissues Reveals Abscission Zone-Specific Modulation of Key Meristem Activity Genes
Source: PubMed Central journal article supplement (PMC3563536; doi:10.1371/journal.pone.0055238), 2013-02-04
Supplement: pone.0055238.s003.pdf [file pone.0055238.s003.pdf]

**Table S1.** RT-PCR validation of differentially expressed genes. RNA concentrations were adjusted using the actin gene.

| Categories               | Probe set ID          | Genbank Accession | Gene                       | Ratio of microarray signal | RT PCR                                                                                |
|--------------------------|-----------------------|-------------------|----------------------------|----------------------------|---------------------------------------------------------------------------------------|
|                          |                       |                   |                            |                            | 0h AP:0h AZ:0h BP                                                                     |
| <b>Tissue-specific</b>   |                       |                   |                            |                            |                                                                                       |
| <u>AZ</u>                |                       |                   |                            |                            |                                                                                       |
|                          | LesAffx.39.1.S1_at    | CN385433          | Peroxidase 72 precursor    | 0.009:1:0.087              |    |
|                          | Les.3668.1.S1_at      | U09026.1          | Lipoxygenase               | 0.044:1:0.477              |    |
|                          | LesAffx.61901.1.S1_at | AW931428          | Patatin-like phospholipase | 0.093:1:0.114              |    |
|                          | Les.4938.1.S1_at      | BT012940.1        | Unknown                    | 0.059:1:0.278              |    |
|                          | Les.4136.1.S1_at      | AJ538329.1        | Wuschel                    | 0.06:1:0.065               |    |
|                          | LesAffx.24134.1.S1_at | CK720539          | Oxidoreductase             | 0.1:1:0.188                |    |
|                          | Les.3693.1.S1_at      | AF426174.1        | Blind                      | 0.041:1:0.103              |    |
|                          | Les.1175.2.S1_at      | AI777697          | Photoassimilate protein    | 0.073:1:0.226              |    |
|                          | Les.69.1.S1_at        | AF098674.1        | Lateral suppressor         | 0.125:1:0.132              |    |
|                          | LesAffx.62669.1.S1_at | AW442297          | LOB domain protein         | 0.276:1:0.476              |    |
| <u>non-AZ</u>            |                       |                   |                            |                            |                                                                                       |
|                          | LesAffx.26180.1.S1_at | BG132890          | Nudix hydrolase            | 4.69:1:2.74                |    |
|                          | Les.2001.1.S1_at      | AW029653          | Unknown protein            | 2.847:1:3.058              |    |
|                          | Les.144.1.S1_at       | Z75519.1          | Glycine-rich protein       | 2.871:1:2.909              |   |
|                          | Les.3415.3.S1_at      | AI779314          | Chloroplast protein 12     | 2.05:1:2.65                |  |
|                          | Les.4896.1.S1_at      | BT012857.1        | Pollen allergen Phl p 11   | 3.564:1:3.941              |  |
| <b>Ethylene response</b> |                       |                   |                            |                            |                                                                                       |
|                          |                       |                   |                            |                            | AP (0h:3h:6h)                                                                         |
| <u>AP</u>                |                       |                   |                            |                            |                                                                                       |
|                          | LesAffx.56389.1.S1_at | AW034707          | NADH- oxidoreductase       | 0.122:1:3.98               |  |
|                          | LesAffx.59842.1.S1_at | BI205718          | Cytochrome P450 724B       | 0.813:1:15.6               |  |
|                          | LesAffx.65984.1.S1_at | BG125327          | Glycosyl hydrolase         | 3.75:1:0.261               |  |
|                          | Les.3733.1.S1_at      | AF096776.1        | Expansin                   | 4.91:1:0.319               |  |
|                          |                       |                   |                            |                            | AZ (0h:3h:6h)                                                                         |
| <u>AZ</u>                |                       |                   |                            |                            |                                                                                       |
|                          | LesAffx.67592.1.S1_at | AW093105          | Protease inhibitor         | 0.09:1:1.68                |  |
|                          | Les.5442.1.S1_at      | BT013931.1        | AUX/IAA family protein     | 0.232:1:2.674              |  |
|                          | Les.2316.1.S1_at      | AW623527          | Cellulose synthase         | 3.545:1:0.166              |  |
|                          | Les.2316.2.A1_at      | BG626036          | Glycine-rich protein       | 3.093:1:0.164              |  |
|                          |                       |                   |                            |                            | BP (0h:3h:6h)                                                                         |
| <u>BP</u>                |                       |                   |                            |                            |                                                                                       |
|                          | LesAffx.8850.1.S1_at  | AW034398          | Pepper esterase            | 0.358:1:3.085              |  |
|                          | LesAffx.29797.1.S1_at | AJ784483          | Sulfotransferase           | 1.271:1:0.148              |  |
