# Supplementary material for: Transcriptome Analysis of Tomato Flower Pedicel Tissues Reveals Abscission Zone-Specific Modulation of Key Meristem Activity Genes
Source: PubMed Central journal article supplement (PMC3563536; doi:10.1371/journal.pone.0055238), 2013-02-04
Supplement: pone.0055238.s004.pdf [file pone.0055238.s004.pdf]

**Table S2** Change in gene expression induced by ethylene compared to air for 68 genes. Changes are expressed as the ratio of expression at 6 h to that at zero h

| Gene Index                                                                | GB acc.    | Gene symbol               | Ethylene change <sup>1</sup><br>Microarray | Air change <sup>2</sup><br>qPCR |
|---------------------------------------------------------------------------|------------|---------------------------|--------------------------------------------|---------------------------------|
| <b>I. Genes with constant expression in air (less than 2-fold change)</b> |            |                           |                                            |                                 |
| TC21734                                                                   | U23053.1   | <b>TAPG1</b> <sup>3</sup> | ↑ 159                                      | 1.43                            |
| TC21734                                                                   | U70480.1   | <b>TAPG2</b>              | 41.6                                       | 1.06                            |
| TC23081                                                                   | AF077339.1 | <b>Cel5</b>               | 17.6                                       | 0.48                            |
| TC24190                                                                   | BT013446.1 | <b>GH3.3</b>              | 14.5                                       | 1.22                            |
| TC21992                                                                   | AY497479.1 | XTH9                      | 12.2                                       | 1.28                            |
| TC22864                                                                   | AF049900.1 | <b>GA20</b>               | 11                                         | 0.89                            |
| TC22599                                                                   | AI490099   | BFN1                      | 6.72                                       | 1.11                            |
| BF11399                                                                   | BF113993   | BT4                       | 5.2                                        | 0.61                            |
| TC21718                                                                   | AY079426.1 | <b>LeETR6</b>             | 4.89                                       | 0.74                            |
| TC21771                                                                   | AF548376.1 | Expansin                  | 4.52                                       | 1.11                            |
| TC21831                                                                   | BT014429.1 | RD19                      | 4.32                                       | 0.97                            |
| TC21715                                                                   | AF154421.1 | BGAL1                     | 4.29                                       | 1.00                            |
| TC22139                                                                   | BI923132   | CML                       | 4.05                                       | 1.33                            |
| TC23203                                                                   | AW442721   | MEP1                      | 4.04                                       | 1.36                            |
| TC23714                                                                   | CD002272   | PNAE                      | 3.68                                       | 0.73                            |
| TC23074                                                                   | BE461086   | PB1                       | 3.68                                       | 0.64                            |
| TC22193                                                                   | AY098737.2 | <b>TAGL12</b>             | 3.45                                       | 0.68                            |
| TC22898                                                                   | AW031388   | PPA                       | 3.43                                       | 0.64                            |
| TC22813                                                                   | AF426174.1 | <b>BLIND</b>              | 3.03                                       | 1.20                            |
| TC23564                                                                   | AI898478   | NAM                       | 2.4                                        | 0.69                            |
| TC21752                                                                   | AF502085.1 | <b>ERF1</b>               | 2.33                                       | 0.63                            |
| TC23336                                                                   | BI209612   | <b>GATA</b>               | 2.1                                        | 1.44                            |
| TC22524                                                                   | AY306154.1 | <b>MC</b>                 | ↓ 0.48                                     | 0.69                            |
| TC24276                                                                   | BT013305.1 | <b>TCP</b>                | 0.45                                       | 0.90                            |
| NP00014                                                                   | AF000141.1 | <b>STM</b>                | 0.39                                       | 0.80                            |
| TC21818                                                                   | BT013322.1 | PORB                      | 0.34                                       | 1.25                            |
| TC22899                                                                   | BT014416.1 | SPDS3                     | 0.31                                       | 0.75                            |
| TC23130                                                                   | BT013032.1 | APS1                      | 0.27                                       | 1.43                            |
| TC21903                                                                   | AY497478.1 | XTH7                      | 0.26                                       | 0.55                            |
| TC22543                                                                   | BI929558   | <b>SPL3</b>               | 0.24                                       | 0.96                            |
| TC22946                                                                   | BT013056.1 | plastocyanin              | 0.23                                       | 0.97                            |
| TC23669                                                                   | BI931445   | M20                       | 0.23                                       | 0.70                            |
| TC23566                                                                   | BG631822   | gatA                      | 0.22                                       | 0.94                            |
| TC23249                                                                   | BG631141   | POT                       | 0.21                                       | 0.82                            |
| TC22972                                                                   | BG627575   | EXL3                      | 0.21                                       | 1.57                            |
| TC22795                                                                   | BG626083   | LTP                       | 0.18                                       | 0.97                            |
| TC23911                                                                   | AI487223   | SALAT                     | 0.13                                       | 1.26                            |
| GO37548                                                                   | CK574995   | ARA6                      | 0.12                                       | 1.48                            |

## **II. Genes with changed expression in air (more than 2-fold change)**

|         |            |              |         |       |
|---------|------------|--------------|---------|-------|
| TC21823 | AF317515.1 | <b>AOS</b>   | ↑ 19.68 | 2.94  |
| TC23987 | AI489739   | <b>ABA8H</b> | 11.76   | 6.09  |
| TC21735 | U70481.1   | <b>TAPG4</b> | 9.76    | 38.66 |
| TC22594 | AY007561.1 | ST4          | 9.11    | 3.71  |
| TC22082 | BI921137   | FBL4         | 7.29    | 4.93  |
| TC21823 | BI205718   | <b>DWF4</b>  | 6.75    | 14.44 |
| TC24138 | BT012835.1 | TR           | 6.47    | 3.06  |
| GO37635 | BT014302.1 | CYS          | 6.33    | 2.43  |
| TC22806 | AJ277944.1 | <b>SNAT</b>  | 5.18    | 2.22  |
| TC22030 | X79338.1   | RNS1         | 4.59    | 2.59  |
| BG13289 | BG132890   | MutT         | 4.37    | 3.69  |
| TC22810 | BG628131   | PMSR         | 3.71    | 4.29  |
| TC24026 | BI208638   | BOU          | 3.45    | 2.15  |
| TC22384 | AI773710   | SDR          | 3.37    | 5.24  |
| TC21740 | AJ715790.1 | <b>ACO1</b>  | 2.42    | 38.27 |
| TC24128 | BT013703.1 | CBF          | ↓ 0.27  | 0.46  |
| TC24140 | BI931777   | SPP          | 0.25    | 0.48  |
| TC23425 | BT013249.1 | LPSP         | 0.22    | 4.81  |
| TC23040 | BI933687   | CYCP3        | 0.21    | 0.32  |
| TC22401 | BT014414.1 | XHB          | 0.21    | 12.11 |
| TC23312 | BT014212.1 | GAPN         | 0.21    | 0.18  |
| TC22961 | BT014378.1 | RPT2         | 0.19    | 0.20  |
| TC23773 | AY497477.1 | XTH6         | 0.17    | 3.23  |
| TC23069 | AI491145   | MGLL         | 0.15    | 0.24  |
| TC21735 | AF191823.1 | <b>AGAL2</b> | 0.15    | 0.38  |
| TC21723 | U50151.1   | lap          | 0.15    | 16.55 |
| NP59756 | AJ538329.1 | <b>LeWUS</b> | 0.14    | 0.26  |

## **III. Genes with constant expression in air and in ethylene**

|         |            |             |      |      |
|---------|------------|-------------|------|------|
| AI77662 | AI776626   | <b>ERF2</b> | 1.31 | 0.60 |
| TC21842 | AY140893.1 | <b>OFP</b>  | 0.96 | 0.93 |
| TC22018 | AF148934.1 | <b>AS1</b>  | 0.69 | 0.77 |

Genes within each section of the table are grouped by the magnitude and sign of their response to ethylene. <sup>1</sup>Data are from the microarray results described in the main text; <sup>2</sup>Gene expression for air treated samples was measured by qPCR. Relative transcript level of each gene was obtained as  $2^{-DCT}$ , where DCT is the difference in the number of cycles to the threshold between the gene and the reference (tomato actin gene, GB acc.U60482.1). The data show the ratio of expression at 6 h to that at 0 h. Results are the average of three biological replicates which each had three technical replicates.; <sup>3</sup>Bold face indicates genes mentioned in the text.

---
