# Supplementary material for: Transcriptome Analysis of Tomato Flower Pedicel Tissues Reveals Abscission Zone-Specific Modulation of Key Meristem Activity Genes
Source: PubMed Central journal article supplement (PMC3563536; doi:10.1371/journal.pone.0055238), 2013-02-04
Supplement: pone.0055238.s005.pdf [file pone.0055238.s005.pdf]

**Table S3.** Differentially expressed genes after 3 h and/or 6 h ethylene treatment in the abscission zone

| Affymetrix Probe Set ID | GenBank Accession | Tomato Gene Index | 0AZ  | 3AZ  | 6AZ  | 3AZ/0AZ | 6AZ/0AZ | GenBank Annotation                                                                                                            |
|-------------------------|-------------------|-------------------|------|------|------|---------|---------|-------------------------------------------------------------------------------------------------------------------------------|
| Les.3665.1.S1_at        | U23053.1          | TC21734           | 12   | 528  | 1970 | 42.62   | 159.18  | polygalacturonase precursor                                                                                                   |
| Les.3647.1.S1_at        | U70480.1          | TC21734           | 98   | 2959 | 4085 | 30.15   | 41.62   | abscission polygalacturonase                                                                                                  |
| Les.5915.1.S1_at        | AY344539.1        | TC22182           | 22   | 331  | 467  | 15.25   | 21.48   | alpha-DOX1                                                                                                                    |
| Les.129.1.S1_at         | AF317515.1        | TC21823           | 80   | 1049 | 1571 | 13.14   | 19.68   | divinyl ether synthase                                                                                                        |
| Les.4885.1.S1_at        | BT012835.1        | TC24138           | 554  | 6412 | 3585 | 11.57   | 6.47    | Lycopersicon esculentum clone 113896R, mRNA sequence                                                                          |
| LesAffx.67592.1.S1_at   | AW093105          | TC22664           | 221  | 2467 | 4144 | 11.19   | 18.79   | Transcribed locus, weakly similar to NP_061135.1 (Asp-Glu-Ala-Asp) box polypeptide 43 [Homo sapiens]                          |
| LesAffx.68306.1.S1_at   | BE461086          | TC23074           | 128  | 1265 | 470  | 9.92    | 3.68    | Transcribed locus, weakly similar to NP_001055605.1 [Oryza sativa (japonica cultivar-group)]                                  |
| LesAffx.22699.1.A1_at   | AI489739          | TC23987           | 19   | 186  | 224  | 9.76    | 11.76   | Transcribed locus, moderately similar to NP_001047855.1 [Oryza sativa (japonica cultivar-group)]                              |
| Les.4527.1.S1_at        | AJ635323.1        | TC22837           | 122  | 1043 | 457  | 8.57    | 3.75    | polyphenol oxidase A                                                                                                          |
| Les.3646.1.S1_at        | U70481.1          | TC21735           | 967  | 8077 | 9439 | 8.36    | 9.76    | abscission polygalacturonase                                                                                                  |
| Les.3712.1.S1_at        | AF154003.1        | TC24028           | 417  | 3446 | 2653 | 8.26    | 6.36    | pirin                                                                                                                         |
| LesAffx.56389.1.S1_at   | AW034707          | TC23934           | 273  | 2189 | 2448 | 8.02    | 8.97    | Transcribed locus, weakly similar to NP_001033715.2 F synthase [Sus scrofa]                                                   |
| Les.132.1.S1_at         | X58885.1          | TC21743           | 1254 | 9707 | 9772 | 7.74    | 7.79    | ethylene-forming enzyme                                                                                                       |
| LesAffx.52594.1.S1_at   | AI895802          | TC22372           | 43   | 314  | 555  | 7.27    | 12.88   | Transcribed locus, weakly similar to NP_001047179.1 [Oryza sativa (japonica cultivar-group)]                                  |
| LesAffx.63489.1.S1_at   | BI921137          | TC22082           | 277  | 1864 | 2020 | 6.73    | 7.29    | Transcribed locus, weakly similar to XP_001117063.1 transmembrane BAX inhibitor motif containing 4 isoform 1 [Macaca mulatta] |
| LesAffx.66354.1.S1_at   | AI773917          | TC22427           | 117  | 769  | 300  | 6.57    | 2.56    | Transcribed locus, weakly similar to NP_001057807.1 [Oryza sativa (japonica cultivar-group)]                                  |
| Les.429.1.S1_at         | X82684.1          | TC22396           | 256  | 1603 | 841  | 6.27    | 3.29    | xyloglycan endo-transglycosylase                                                                                              |
| Les.4353.1.S1_at        | AY497476.1        | TC21758           | 80   | 471  | 305  | 5.87    | 3.8     | xyloglucan endotransglucosylase-hydrolase XTH3                                                                                |
| LesAffx.8850.1.S1_at    | AW034398          | TC22181           | 96   | 538  | 2565 | 5.62    | 26.75   | Subtilisin-like protease                                                                                                      |
| Les.4287.1.S1_at        | CB751564          | TC21784           | 748  | 4170 | 7420 | 5.57    | 9.92    | Transcribed locus, weakly similar to XP_001094505.1 proteasome 26S non-ATPase subunit 3 isoform 4 [Macaca mulatta]            |
| LesAffx.13365.1.S1_at   | BM411110          | TC21920           | 314  | 1666 | 376  | 5.31    | 1.2     | Transcribed locus, weakly similar to NP_001066487.1 [Oryza sativa (japonica cultivar-group)]                                  |
| LesAffx.66301.2.S1_at   | BI423134          | TC22633           | 2    | 9    | 5    | 5.29    | 3.32    | Transcribed locus, weakly similar to NP_001042589.1 [Oryza sativa (japonica cultivar-group)]                                  |
| Les.4530.1.S1_at        | AY497479.1        | TC21992           | 139  | 717  | 1703 | 5.15    | 12.23   | xyloglucan endotransglucosylase-hydrolase XTH9                                                                                |

|                       |            |         |      |       |       |      |       |                                                                                                                   |
|-----------------------|------------|---------|------|-------|-------|------|-------|-------------------------------------------------------------------------------------------------------------------|
| Les.2899.1.S1_at      | BG628131   | TC22810 | 2352 | 12106 | 8732  | 5.15 | 3.71  | Transcribed locus, weakly similar to XP_001108862.1 cathepsin H isoform 2 [Macaca mulatta]                        |
| Les.3766.1.S1_at      | U77719.1   | TC21779 | 235  | 1182  | 1092  | 5.02 | 4.64  | ethylene-responsive late embryogenesis-like protein                                                               |
| LesAffx.3554.1.A1_at  | CK720570   | CK72057 | 16   | 78    | 346   | 5    | 22.28 | ---                                                                                                               |
| Les.113.1.S1_at       | CN384955   | TC23130 | 1970 | 9667  | 9343  | 4.91 | 4.74  | CDNA, clone: FC02BG03, HTC in fruit                                                                               |
| LesAffx.56301.1.S1_at | AI895341   | TC22182 | 1136 | 5437  | 5614  | 4.79 | 4.94  | Transcribed locus, weakly similar to NP_001048145.1 [Oryza sativa (japonica cultivar-group)]                      |
| Les.934.1.S1_at       | BG628248   | GO37331 | 1670 | 7875  | 6408  | 4.72 | 3.84  | Cell wall protein                                                                                                 |
| Les.4307.1.S1_at      | AY257487.1 | TC21819 | 2194 | 10162 | 12323 | 4.63 | 5.62  | PR5-like protein                                                                                                  |
| Les.5672.1.S1_at      | BT014363.1 | TC23335 | 62   | 285   | 473   | 4.56 | 7.59  | Lycopersicon esculentum clone 133649F, mRNA sequence                                                              |
| Les.3491.1.S1_at      | AF077339.1 | TC23081 | 210  | 955   | 3704  | 4.55 | 17.64 | endo-1,4-beta-glucanase                                                                                           |
| Les.1524.1.A1_at      | BG626458   | BG62645 | 442  | 1943  | 1128  | 4.39 | 2.55  | Transcribed locus                                                                                                 |
| LesAffx.37595.1.S1_at | CN385844   | TC22360 | 149  | 647   | 467   | 4.35 | 3.14  | ---                                                                                                               |
| Les.5530.1.S1_at      | BT014086.1 | TC23075 | 906  | 3931  | 3197  | 4.34 | 3.53  | Lycopersicon esculentum clone 133190R, mRNA sequence                                                              |
| Les.5442.1.S1_at      | BT013931.1 | TC22814 | 176  | 760   | 2032  | 4.31 | 11.54 | Lycopersicon esculentum clone 132929R, mRNA sequence                                                              |
| LesAffx.69998.1.S1_at | BI203963   | TC23259 | 70   | 296   | 225   | 4.23 | 3.21  | Transcribed locus, moderately similar to NP_001048806.1 [Oryza sativa (japonica cultivar-group)]                  |
| Les.3575.1.S1_at      | U89256.1   | TC22509 | 52   | 220   | 245   | 4.2  | 4.7   | Pti5                                                                                                              |
| LesAffx.31873.1.S1_at | BI928574   | BI92857 | 487  | 2036  | 4330  | 4.18 | 8.88  | ---                                                                                                               |
| Les.26.1.S1_at        | AF088276.1 | TC21861 | 78   | 323   | 752   | 4.15 | 9.63  | NADPH oxidase                                                                                                     |
| LesAffx.64582.1.S1_at | AI894448   | TC24338 | 392  | 1617  | 758   | 4.13 | 1.93  | ---                                                                                                               |
| Les.4038.1.S1_at      | AY081908.1 | TC21781 | 177  | 725   | 651   | 4.09 | 3.68  | Lycopersicon esculentum N-hydroxycinnamoyl-CoA:tyramine N-hydroxycinnamoyl transferase THT1-4 (THT1-4) pseudogene |
| LesAffx.67116.1.S1_at | BM413085   | TC21926 | 209  | 849   | 810   | 4.07 | 3.88  | Transcribed locus, weakly similar to NP_065266.1 translocase [Mus musculus]                                       |
| Les.2899.2.S1_at      | BM536145   | TC22810 | 1101 | 4418  | 2846  | 4.01 | 2.58  | Transcribed locus, weakly similar to XP_001108862.1 cathepsin H isoform 2 [Macaca mulatta]                        |
| Les.4888.1.S1_at      | BI927238   | TC24096 | 754  | 3009  | 3539  | 3.99 | 4.7   | Lycopersicon esculentum clone 113905R, mRNA sequence                                                              |
| LesAffx.37595.1.A1_at | CN385844   | TC22360 | 32   | 126   | 81    | 3.97 | 2.56  | ---                                                                                                               |
| LesAffx.71377.1.S1_at | BG123375   | TC22940 | 78   | 309   | 172   | 3.96 | 2.2   | Transcribed locus, weakly similar to NP_001047645.1 [Oryza sativa (japonica cultivar-group)]                      |
| LesAffx.59668.1.S1_at | BI208638   | TC24026 | 516  | 2015  | 1779  | 3.91 | 3.45  | Transcribed locus, weakly similar to NP_065266.1 translocase [Mus musculus]                                       |
| Les.1046.1.S1_at      | X72730.1   | TC22785 | 268  | 1041  | 651   | 3.89 | 2.43  | (ERT 10) ripening-related mRNA                                                                                    |
| LesAffx.62570.2.S1_at | CD003040   | TC24016 | 476  | 1849  | 1810  | 3.88 | 3.8   | Transcribed locus, weakly similar to NP_001044685.1 [Oryza sativa (japonica cultivar-group)]                      |
| LesAffx.22583.1.S1_at | AI484022   | TC23670 | 358  | 1383  | 999   | 3.86 | 2.79  | Transcribed locus, weakly similar to NP_001044974.1 [Oryza sativa (japonica cultivar-group)]                      |

|                         |            |         |      |      |      |      |      |                                                                                                  |
|-------------------------|------------|---------|------|------|------|------|------|--------------------------------------------------------------------------------------------------|
| Les.4055.1.S1_at        | BM536050   | TC23122 | 91   | 350  | 244  | 3.86 | 2.68 | Lycopersicon esculentum (DB222) meloidogyne-induced giant cell protein mRNA, 3' end              |
| LesAffx.50687.1.S1_at   | AI773710   | TC22384 | 485  | 1869 | 1635 | 3.85 | 3.37 | Transcribed locus, weakly similar to NP_001046905.1 [Oryza sativa (japonica cultivar-group)]     |
| LesAffx.69872.1.S1_at   | CN385882   | TC23745 | 101  | 387  | 631  | 3.84 | 6.25 | Transcribed locus                                                                                |
| Les.4222.1.S1_at        | AY034149.1 | TC21756 | 167  | 637  | 477  | 3.82 | 2.86 | alternative oxidase 1b                                                                           |
| Les.5051.1.S1_at        | BT013182.1 | TC22934 | 275  | 1047 | 1207 | 3.81 | 4.39 | Lycopersicon esculentum clone 134258F, mRNA sequence                                             |
| Les.3818.1.S1_at        | AF502085.1 | TC21752 | 192  | 729  | 446  | 3.8  | 2.33 | ethylene responsive element binding protein                                                      |
| Les.2708.1.S1_at        | BG734625   | TC21907 | 2182 | 8284 | 8140 | 3.8  | 3.73 | Transcribed locus, moderately similar to NP_001044464.1 [Oryza sativa (japonica cultivar-group)] |
| LesAffx.70522.1.S1_at   | BI423015   | TC23029 | 567  | 2147 | 2806 | 3.78 | 4.94 | Transcribed locus, weakly similar to NP_001055496.1 [Oryza sativa (japonica cultivar-group)]     |
| LesAffx.64582.2.A1_at   | AI490624   | TC24338 | 212  | 797  | 318  | 3.75 | 1.5  | ---                                                                                              |
| LesAffx.62570.2.A1_at   | CD003040   | TC24016 | 75   | 280  | 192  | 3.74 | 2.57 | Transcribed locus, weakly similar to NP_001044685.1 [Oryza sativa (japonica cultivar-group)]     |
| LesAffx.60582.1.S1_at   | AI899413   | TC23540 | 264  | 985  | 804  | 3.73 | 3.04 | Transcribed locus, weakly similar to NP_001048083.1 [Oryza sativa (japonica cultivar-group)]     |
| Les.2256.1.S1_at        | BT014302.1 | GO37635 | 120  | 441  | 756  | 3.69 | 6.33 | Lycopersicon esculentum clone 133553F, mRNA sequence                                             |
| Les.3465.1.S1_at        | AY079426.1 | TC21718 | 221  | 811  | 1082 | 3.67 | 4.89 | ethylene receptor-like protein                                                                   |
| LesAffx.69349.2.S1_at   | AW623862   | AW62386 | 251  | 916  | 970  | 3.65 | 3.87 | Transcribed locus, weakly similar to NP_001043801.1 [Oryza sativa (japonica cultivar-group)]     |
| Les.2717.1.S1_at        | AW218373   | TC22994 | 576  | 2094 | 1948 | 3.63 | 3.38 | Transcribed locus, moderately similar to NP_001057280.1 [Oryza sativa (japonica cultivar-group)] |
| Les.4819.1.S1_at        | BT013586.1 | TC24267 | 684  | 2482 | 827  | 3.63 | 1.21 | Lycopersicon esculentum hsc-1 mRNA for heat shock protein 70 kD                                  |
| Les.559.1.A1_at         | BG626246   | TC22601 | 229  | 828  | 1081 | 3.62 | 4.73 | Transcribed locus, weakly similar to NP_001043106.1 [Oryza sativa (japonica cultivar-group)]     |
| Les.4888.1.A1_at        | BT012839.1 | AW39852 | 329  | 1182 | 1146 | 3.6  | 3.49 | Lycopersicon esculentum clone 113905R, mRNA sequence                                             |
| LesAffx.54536.1.S1_at   | BM409044   | TC23408 | 351  | 1256 | 1050 | 3.58 | 3    | Transcribed locus, weakly similar to NP_001046834.1 [Oryza sativa (japonica cultivar-group)]     |
| Les.5884.1.S1_at        | CK716273   | TC21763 | 1125 | 3978 | 7818 | 3.54 | 6.95 | Transcribed locus, weakly similar to NP_173228.1 inhibitor [Arabidopsis thaliana]                |
| Les.1665.1.S1_at        | AW623646   | DB71244 | 511  | 1795 | 1067 | 3.52 | 2.09 | Transcribed locus, weakly similar to NP_001042158.1 [Oryza sativa (japonica cultivar-group)]     |
| LesAffx.33607.2.S1_s_at | AI775872   | TC23890 | 603  | 2100 | 1839 | 3.48 | 3.05 | Calmodulin                                                                                       |
| LesAffx.43329.1.S1_at   | AI898478   | TC23564 | 136  | 473  | 328  | 3.47 | 2.4  | Transcribed locus, weakly similar to NP_001041763.1 [Oryza sativa (japonica cultivar-group)]     |

|                       |            |         |      |      |      |      |      |                                                                                                                                 |
|-----------------------|------------|---------|------|------|------|------|------|---------------------------------------------------------------------------------------------------------------------------------|
| LesAffx.70406.1.S1_at | AW036249   | TC22360 | 206  | 709  | 1173 | 3.45 | 5.71 | Transcribed locus, weakly similar to XP_001114236.1 branched chain aminotransferase 2, mitochondrial isoform 2 [Macaca mulatta] |
| Les.3716.1.S1_at      | AJ277944.1 | TC22806 | 718  | 2473 | 3718 | 3.44 | 5.18 | SANT/MYB domain protein                                                                                                         |
| LesAffx.68459.2.S1_at | BM411992   | TC22747 | 191  | 656  | 682  | 3.44 | 3.57 | Transcribed locus, weakly similar to NP_001051596.1 [Oryza sativa (japonica cultivar-group)]                                    |
| LesAffx.735.1.S1_at   | AW217158   | TC22685 | 293  | 1002 | 736  | 3.42 | 2.51 | Transcribed locus, weakly similar to NP_001042221.1 [Oryza sativa (japonica cultivar-group)]                                    |
| Les.423.1.S1_at       | BM409421   | TC22953 | 1000 | 3413 | 2260 | 3.41 | 2.26 | CDNA, clone: FC09CF07, HTC in fruit                                                                                             |
| Les.2417.2.A1_at      | BG735382   | TC23220 | 163  | 557  | 382  | 3.41 | 2.34 | Transcribed locus                                                                                                               |
| LesAffx.71065.1.S1_at | BM413117   | TC22472 | 853  | 2901 | 3161 | 3.4  | 3.7  | Transcribed locus, weakly similar to NP_001042582.1 [Oryza sativa (japonica cultivar-group)]                                    |
| LesAffx.57303.1.S1_at | AW625293   | TC22186 | 458  | 1551 | 1936 | 3.39 | 4.23 | Transcribed locus, weakly similar to NP_198885.1 protein [Arabidopsis thaliana]                                                 |
| LesAffx.9910.1.S1_at  | CN385590   | TC22147 | 823  | 2779 | 2593 | 3.38 | 3.15 | Transcribed locus, weakly similar to NP_001046094.1 [Oryza sativa (japonica cultivar-group)]                                    |
| Les.4022.1.S1_at      | X94946.1   | TC21814 | 349  | 1172 | 2103 | 3.36 | 6.02 | proteinase inhibitor II                                                                                                         |
| Les.2084.1.S1_at      | BF097539   | TC22764 | 298  | 994  | 845  | 3.34 | 2.84 | Transcribed locus, weakly similar to NP_001041763.1 [Oryza sativa (japonica cultivar-group)]                                    |
| LesAffx.58497.1.S1_at | BM411367   | TC23480 | 49   | 164  | 121  | 3.32 | 2.45 | ---                                                                                                                             |
| LesAffx.43198.1.S1_at | BF113993   | BF11399 | 118  | 391  | 615  | 3.3  | 5.2  | Transcribed locus, weakly similar to NP_001045064.1 [Oryza sativa (japonica cultivar-group)]                                    |
| Les.702.1.S1_at       | BG627003   | TC21772 | 1175 | 3875 | 1348 | 3.3  | 1.15 | Lycopersicon esculentum clone 134862F, mRNA sequence                                                                            |
| Les.868.1.A1_at       | BG627808   | TC22948 | 34   | 112  | 39   | 3.26 | 1.15 | Transcribed locus, weakly similar to NP_001042402.1 [Oryza sativa (japonica cultivar-group)]                                    |
| LesAffx.67643.1.S1_at | BI926164   | TC22219 | 364  | 1188 | 380  | 3.26 | 1.04 | Transcribed locus, weakly similar to XP_001116534.1 similar to asparaginase-like 1 protein isoform 1 [Macaca mulatta]           |
| Les.1826.1.A1_at      | BG629397   | TC23561 | 288  | 935  | 1023 | 3.25 | 3.56 | Transcribed locus                                                                                                               |
| LesAffx.22830.1.S1_at | CN385777   | TC22584 | 168  | 544  | 409  | 3.24 | 2.44 | Transcribed locus, weakly similar to NP_001063070.1 [Oryza sativa (japonica cultivar-group)]                                    |
| LesAffx.62138.1.S1_at | AW737374   | TC24364 | 289  | 936  | 970  | 3.23 | 3.35 | ---                                                                                                                             |
| Les.244.2.S1_a_at     | AI485696   | TC22935 | 173  | 556  | 510  | 3.21 | 2.95 | Calmodulin                                                                                                                      |
| LesAffx.57363.1.S1_at | AW035806   | TC21958 | 132  | 423  | 561  | 3.21 | 4.26 | Transcribed locus, weakly similar to NP_001042342.1 [Oryza sativa (japonica cultivar-group)]                                    |
| LesAffx.16102.1.S1_at | BI208311   | TC23896 | 82   | 261  | 202  | 3.19 | 2.48 | Transcribed locus, weakly similar to NP_001042808.1 [Oryza sativa (japonica cultivar-group)]                                    |
| LesAffx.69783.1.S1_at | AW220917   | TC23448 | 601  | 1882 | 2066 | 3.13 | 3.44 | Transcribed locus, weakly similar to NP_001067067.1 [Oryza sativa (japonica cultivar-group)]                                    |

|                         |            |         |      |      |      |      |      |                                                                                                  |
|-------------------------|------------|---------|------|------|------|------|------|--------------------------------------------------------------------------------------------------|
| LesAffx.63935.1.S1_at   | AW442721   | TC23203 | 224  | 701  | 904  | 3.13 | 4.04 | Transcribed locus, weakly similar to XP_001098000.1 matrix metalloproteinase 8 [Macaca mulatta]  |
| LesAffx.33607.1.S1_s_at | AW223067   | TC23890 | 250  | 777  | 698  | 3.11 | 2.8  | Calmodulin                                                                                       |
| Les.5934.1.S1_at        | AI895164   | TC21861 | 354  | 1101 | 2831 | 3.11 | 7.99 | Transcribed locus, weakly similar to NP_001047927.1 [Oryza sativa (japonica cultivar-group)]     |
| LesAffx.15921.1.S1_at   | BM412286   | TC23758 | 727  | 2257 | 1795 | 3.11 | 2.47 | Transcribed locus, weakly similar to NP_001057315.1 [Oryza sativa (japonica cultivar-group)]     |
| Les.3683.1.S1_at        | AY093595.1 | TC24086 | 352  | 1092 | 1785 | 3.1  | 5.07 | PR-5x                                                                                            |
| LesAffx.11542.1.S1_at   | BI922302   | TC21973 | 74   | 230  | 245  | 3.1  | 3.29 | Transcribed locus, weakly similar to NP_001044352.1 [Oryza sativa (japonica cultivar-group)]     |
| Les.3710.1.S1_at        | AJ312131.1 | TC21745 | 135  | 417  | 386  | 3.09 | 2.86 | alternaria stem canker resistance protein                                                        |
| Les.2708.2.S1_at        | AW218185   | TC21907 | 1742 | 5274 | 5454 | 3.03 | 3.13 | Transcribed locus, moderately similar to NP_001044464.1 [Oryza sativa (japonica cultivar-group)] |
| LesAffx.36193.1.S1_at   | AW034622   | TC22914 | 134  | 398  | 435  | 2.98 | 3.25 | Transcribed locus, weakly similar to NP_001050443.1 [Oryza sativa (japonica cultivar-group)]     |
| LesAffx.17017.1.S1_at   | CN384671   | TC24170 | 163  | 486  | 455  | 2.97 | 2.79 | Transcribed locus, weakly similar to NP_186978.1 protein [Arabidopsis thaliana]                  |
| LesAffx.8720.1.S1_at    | BI921446   | BI92223 | 282  | 833  | 1438 | 2.96 | 5.11 | Transcribed locus, weakly similar to NP_663449.2 P450-like [Mus musculus]                        |
| Les.5759.1.S1_at        | BM956714   | TC22993 | 378  | 1115 | 2305 | 2.95 | 6.09 | Lycopersicon esculentum clone 133897F, mRNA sequence                                             |
| LesAffx.71608.1.A1_at   | CN385447   | TC22596 | 32   | 93   | 74   | 2.94 | 2.34 | Transcribed locus, weakly similar to NP_186978.1 protein [Arabidopsis thaliana]                  |
| LesAffx.38395.2.A1_at   | AI488594   | AI48859 | 110  | 321  | 272  | 2.92 | 2.48 | ---                                                                                              |
| LesAffx.3059.1.S1_at    | AI776626   | AI77662 | 115  | 336  | 151  | 2.91 | 1.31 | ---                                                                                              |
| Les.3735.1.S1_at        | AY007561.1 | TC22594 | 129  | 376  | 1176 | 2.91 | 9.11 | hypothetical LOC543816                                                                           |
| Les.5557.1.S1_at        | BT014139.1 |         | 101  | 293  | 141  | 2.9  | 1.4  | Lycopersicon esculentum clone 133258F, mRNA sequence                                             |
| LesAffx.43329.1.A1_at   | AI489164   | TC23564 | 75   | 217  | 140  | 2.9  | 1.87 | Transcribed locus, weakly similar to NP_001041763.1 [Oryza sativa (japonica cultivar-group)]     |
| LesAffx.63659.1.S1_at   | BI921813   | TC22794 | 962  | 2787 | 2814 | 2.9  | 2.93 | Transcribed locus, weakly similar to NP_001047062.1 [Oryza sativa (japonica cultivar-group)]     |
| LesAffx.64990.1.S1_at   | BI422984   | TC21791 | 705  | 2042 | 1788 | 2.89 | 2.53 | Transcribed locus, weakly similar to NP_001051696.1 [Oryza sativa (japonica cultivar-group)]     |
| Les.4223.1.S1_at        | AY034148.1 | TC21729 | 645  | 1854 | 1134 | 2.87 | 1.76 | alternative oxidase 1a                                                                           |
| Les.2717.2.A1_at        | BG631585   | TC22994 | 884  | 2534 | 2449 | 2.87 | 2.77 | Transcribed locus, moderately similar to NP_001057280.1 [Oryza sativa (japonica cultivar-group)] |
| LesAffx.71608.1.S1_at   | AI486489   | TC22596 | 61   | 175  | 138  | 2.86 | 2.25 | Transcribed locus, weakly similar to NP_186978.1 protein [Arabidopsis thaliana]                  |
| LesAffx.3554.1.S1_at    | CK720570   | CK72057 | 19   | 54   | 158  | 2.85 | 8.31 | ---                                                                                              |
| LesAffx.71606.1.S1_s_at | AI896002   | TC24027 | 1830 | 5197 | 4644 | 2.84 | 2.54 | Lycopersicon esculentum clone 114334F, mRNA sequence                                             |
| Les.5126.1.S1_at        | BT013336.1 | TC22310 | 428  | 1203 | 1253 | 2.81 | 2.93 | Lycopersicon esculentum clone 135126R, mRNA sequence                                             |

|                       |            |         |      |      |      |      |      |                                                                                                                                    |
|-----------------------|------------|---------|------|------|------|------|------|------------------------------------------------------------------------------------------------------------------------------------|
| LesAffx.61149.1.S1_at | BE460847   | TC24084 | 459  | 1284 | 1756 | 2.8  | 3.83 | Transcribed locus, weakly similar to NP_001042177.1 [Oryza sativa (japonica cultivar-group)]                                       |
| LesAffx.64741.1.S1_at | AI775317   | TC22074 | 1285 | 3544 | 2935 | 2.76 | 2.28 | Transcribed locus, weakly similar to XP_001103467.1 similar to 3-hydroxyisobutyryl-Coenzyme A hydrolase isoform 1 [Macaca mulatta] |
| LesAffx.68107.1.S1_at | AI485479   | TC23454 | 135  | 371  | 371  | 2.75 | 2.75 | Transcribed locus, moderately similar to NP_001048067.1 [Oryza sativa (japonica cultivar-group)]                                   |
| Les.2813.2.A1_at      | BG734870   | TC24032 | 648  | 1781 | 1662 | 2.75 | 2.56 | Transcribed locus, moderately similar to NP_001045523.1 [Oryza sativa (japonica cultivar-group)]                                   |
| LesAffx.38395.1.S1_at | BI933523   | DB72634 | 509  | 1376 | 1471 | 2.7  | 2.89 | Transcribed locus, moderately similar to NP_001057975.1 [Oryza sativa (japonica cultivar-group)]                                   |
| LesAffx.57163.2.S1_at | BI421649   | TC22802 | 341  | 918  | 145  | 2.7  | 0.43 | Transcribed locus, weakly similar to NP_001044707.1 [Oryza sativa (japonica cultivar-group)]                                       |
| LesAffx.30145.1.S1_at | AI775220   | ES89125 | 2676 | 7210 | 7615 | 2.69 | 2.85 | Transcribed locus, weakly similar to NP_001046577.1 [Oryza sativa (japonica cultivar-group)]                                       |
| LesAffx.124.1.S1_at   | AW443936   | TC23232 | 37   | 99   | 108  | 2.69 | 2.93 | CDNA, clone: FC20CD10, HTC in fruit                                                                                                |
| LesAffx.24637.1.S1_at | CN550618   | TC22796 | 748  | 2010 | 4189 | 2.69 | 5.6  | Transcribed locus, weakly similar to NP_001049089.1 [Oryza sativa (japonica cultivar-group)]                                       |
| Les.5091.1.S1_at      | BT013255.1 | TC22888 | 306  | 823  | 457  | 2.69 | 1.49 | Lycopersicon esculentum clone 134773R, mRNA sequence                                                                               |
| LesAffx.8720.2.S1_at  | AI895030   | TC22019 | 482  | 1295 | 2210 | 2.68 | 4.58 | Transcribed locus, weakly similar to NP_663449.2 P450-like [Mus musculus]                                                          |
| Les.1798.1.S1_at      | AW221951   | TC22540 | 136  | 365  | 227  | 2.68 | 1.67 | Transcribed locus, weakly similar to NP_001046050.1 [Oryza sativa (japonica cultivar-group)]                                       |
| Les.3619.1.S1_at      | J04099.1   | TC23203 | 2782 | 7424 | 9845 | 2.67 | 3.54 | proteinase inhibitor I                                                                                                             |
| Les.4999.1.A1_at      | BT013077.1 | TC23341 | 504  | 1344 | 1016 | 2.67 | 2.02 | Lycopersicon esculentum clone 114334F, mRNA sequence                                                                               |
| Les.1899.1.A1_at      | BG630030   | TC24035 | 16   | 42   | 19   | 2.66 | 1.22 | Transcribed locus                                                                                                                  |
| LesAffx.37563.1.S1_at | Z70216.1   | TC23549 | 234  | 620  | 409  | 2.65 | 1.75 | ---                                                                                                                                |
| LesAffx.51158.1.S1_at | AI897068   | TC23014 | 180  | 476  | 355  | 2.64 | 1.97 | Transcribed locus, weakly similar to NP_001048008.1 [Oryza sativa (japonica cultivar-group)]                                       |
| LesAffx.47070.1.S1_at | AW651406   | AW65140 | 23   | 62   | 93   | 2.64 | 3.98 | Transcribed locus, moderately similar to NP_001042375.1 [Oryza sativa (japonica cultivar-group)]                                   |
| Les.4999.1.S1_at      | BT013077.1 | TC23341 | 2510 | 6613 | 5895 | 2.63 | 2.35 | Lycopersicon esculentum clone 114334F, mRNA sequence                                                                               |
| LesAffx.71311.1.S1_at | CN384672   | TC22685 | 129  | 340  | 190  | 2.63 | 1.47 | CDNA, clone: FC16CB09, HTC in fruit                                                                                                |
| Les.5848.2.S1_at      | BM535694   | TC22461 | 210  | 550  | 316  | 2.62 | 1.5  | Transcribed locus, weakly similar to XP_001121814.1 similar to CG9009-PA [Apis mellifera]                                          |
| LesAffx.26054.1.S1_at | BG135770   | TC21811 | 133  | 346  | 229  | 2.61 | 1.72 | CDNA, clone: FC09AA01, HTC in fruit                                                                                                |
| Les.3774.1.S1_at      | AJ010942.1 | TC23863 | 1488 | 3864 | 2205 | 2.6  | 1.48 | hexose transporter protein                                                                                                         |

|                       |            |         |      |      |      |      |      |                                                                                                                                                                                                                             |
|-----------------------|------------|---------|------|------|------|------|------|-----------------------------------------------------------------------------------------------------------------------------------------------------------------------------------------------------------------------------|
| LesAffx.7602.1.S1_at  | AW443858   | TC23283 | 940  | 2437 | 2131 | 2.59 | 2.27 | Transcribed locus, weakly similar to XP_001106031.1 adenylate kinase 2 isoform 2 [Macaca mulatta]                                                                                                                           |
| Les.3935.1.S1_at      | BT013403.1 | TC21790 | 3663 | 9481 | 8863 | 2.59 | 2.42 | Lycopersicon esculentum clone 135717R, mRNA sequence                                                                                                                                                                        |
| LesAffx.52595.1.S1_at | AI778688   | TC22841 | 878  | 2272 | 2340 | 2.59 | 2.66 | Transcribed locus, weakly similar to XP_001103792.1 ERO1-like isoform 1 [Macaca mulatta]                                                                                                                                    |
| Les.5014.1.S1_at      | BT013105.1 | TC23486 | 1248 | 3229 | 4039 | 2.59 | 3.24 | Lycopersicon esculentum clone 114391R, mRNA sequence                                                                                                                                                                        |
| LesAffx.47179.1.S1_at | BM411655   | TC24073 | 510  | 1313 | 859  | 2.58 | 1.69 | Transcribed locus, weakly similar to NP_010015.2 serine/threonine protein kinase most similar to cyclic nucleotide-dependent protein kinase subfamily and the protein kinase C subfamily; Kin82p [Saccharomyces cerevisiae] |
| LesAffx.38395.2.S1_at | AI488594   | AI48859 | 251  | 646  | 755  | 2.57 | 3.01 | ---                                                                                                                                                                                                                         |
| LesAffx.50112.1.S1_at | AI898985   | TC23361 | 1305 | 3353 | 3725 | 2.57 | 2.85 | Transcribed locus, weakly similar to NP_001047062.1 [Oryza sativa (japonica cultivar-group)]                                                                                                                                |
| Les.2682.1.S1_at      | CN385606   | TC22504 | 343  | 881  | 602  | 2.57 | 1.75 | Transcribed locus                                                                                                                                                                                                           |
| Les.2591.1.S1_at      | M80608.1   |         | 1880 | 4800 | 9661 | 2.55 | 5.14 | beta-1,3-glucanase                                                                                                                                                                                                          |
| Les.4528.1.S1_at      | AJ635324.1 | TC22837 | 13   | 34   | 24   | 2.55 | 1.78 | polyphenol oxidase A                                                                                                                                                                                                        |
| LesAffx.58326.1.A1_at | CD002272   | TC23714 | 307  | 783  | 1129 | 2.55 | 3.68 | Transcribed locus, weakly similar to NP_001042998.1 [Oryza sativa (japonica cultivar-group)]                                                                                                                                |
| LesAffx.51158.2.S1_at | AI898095   | TC23014 | 166  | 421  | 338  | 2.53 | 2.03 | Transcribed locus, weakly similar to NP_001048008.1 [Oryza sativa (japonica cultivar-group)]                                                                                                                                |
| LesAffx.58502.1.S1_at | BM412364   | TC22738 | 401  | 1011 | 674  | 2.52 | 1.68 | Transcribed locus, weakly similar to NP_001042057.1 [Oryza sativa (japonica cultivar-group)]                                                                                                                                |
| Les.2629.1.A1_at      | BG628013   | TC22785 | 7    | 18   | 11   | 2.52 | 1.56 | Transcribed locus, moderately similar to NP_001049773.1 [Oryza sativa (japonica cultivar-group)]                                                                                                                            |
| Les.2417.1.S1_at      | AI779519   | TC23220 | 310  | 778  | 555  | 2.51 | 1.79 | Transcribed locus                                                                                                                                                                                                           |
| LesAffx.47116.1.S1_at | AW224087   | TC23403 | 1041 | 2611 | 2081 | 2.51 | 2    | Transcribed locus, weakly similar to XP_001089495.1 cystinosis, nephropathic isoform 1 [Macaca mulatta]                                                                                                                     |
| Les.2212.1.A1_at      | BG735110   | BG73511 | 144  | 361  | 219  | 2.51 | 1.52 | Lycopersicon esculentum clone 133400R, mRNA sequence                                                                                                                                                                        |
| Les.4861.1.S1_at      | BT012784.1 | TC23346 | 220  | 551  | 401  | 2.5  | 1.82 | Lycopersicon esculentum clone 113774R, mRNA sequence                                                                                                                                                                        |
| LesAffx.64978.1.S1_at | CN385434   | FS18759 | 749  | 1871 | 1681 | 2.5  | 2.24 | Transcribed locus, weakly similar to NP_001054079.1 [Oryza sativa (japonica cultivar-group)]                                                                                                                                |
| LesAffx.53698.1.S1_at | BG127688   | EG55334 | 623  | 1542 | 1272 | 2.48 | 2.04 | Transcribed locus, weakly similar to NP_001042476.1 [Oryza sativa (japonica cultivar-group)]                                                                                                                                |
| LesAffx.1001.1.S1_at  | BM535807   | TC22526 | 352  | 870  | 633  | 2.47 | 1.8  | ---                                                                                                                                                                                                                         |
| LesAffx.59059.1.S1_at | AW622913   | TC22426 | 336  | 823  | 734  | 2.45 | 2.19 | Transcribed locus, weakly similar to NP_001048067.1 [Oryza sativa (japonica cultivar-group)]                                                                                                                                |

|                       |            |         |      |      |      |      |      |                                                                                                     |
|-----------------------|------------|---------|------|------|------|------|------|-----------------------------------------------------------------------------------------------------|
| Les.2668.2.A1_at      | BG631544   | TC23628 | 61   | 148  | 166  | 2.45 | 2.75 | Transcribed locus, weakly similar to NP_001042430.1 [Oryza sativa (japonica cultivar-group)]        |
| LesAffx.71530.1.S1_at | BI930780   | TC23505 | 1150 | 2807 | 2781 | 2.44 | 2.42 | Transcribed locus, weakly similar to NP_001048090.1 [Oryza sativa (japonica cultivar-group)]        |
| LesAffx.59507.1.S1_at | BI203990   | TC21999 | 460  | 1122 | 959  | 2.44 | 2.09 | Transcribed locus, weakly similar to NP_001059980.1 [Oryza sativa (japonica cultivar-group)]        |
| LesAffx.70414.1.S1_at | AW034339   | TC21936 | 1829 | 4453 | 2974 | 2.43 | 1.63 | Transcribed locus, weakly similar to NP_001045308.1 [Oryza sativa (japonica cultivar-group)]        |
| LesAffx.32607.1.S1_at | BI206284   | TC23179 | 10   | 23   | 20   | 2.43 | 2.06 | ---                                                                                                 |
| Les.5091.1.A1_at      | BT013255.1 | TC22888 | 213  | 519  | 225  | 2.43 | 1.06 | Lycopersicon esculentum clone 134773R, mRNA sequence                                                |
| LesAffx.10955.3.S1_at | AW035238   | TC22366 | 325  | 788  | 376  | 2.43 | 1.16 | Transcribed locus, moderately similar to NP_001043233.1 [Oryza sativa (japonica cultivar-group)]    |
| Les.54.1.S1_at        | AW218809   | TC22203 | 240  | 580  | 1351 | 2.42 | 5.63 | PR-1a1 protein                                                                                      |
| Les.5433.1.S1_at      | BT013909.1 | TC22191 | 312  | 755  | 737  | 2.42 | 2.36 | Lycopersicon esculentum clone 132906R, mRNA sequence                                                |
| Les.5481.1.S1_at      | BT014001.1 | TC21763 | 994  | 2399 | 2969 | 2.41 | 2.99 | Lycopersicon esculentum clone 133050F, mRNA sequence                                                |
| LesAffx.20450.1.S1_at | AW223514   | TC21776 | 1920 | 4629 | 4135 | 2.41 | 2.15 | Transcribed locus, weakly similar to NP_001042868.1 [Oryza sativa (japonica cultivar-group)]        |
| LesAffx.45975.1.S1_at | BI209975   | BI20997 | 335  | 804  | 714  | 2.4  | 2.13 | ---                                                                                                 |
| Les.593.1.A1_at       | BG626426   | BG62642 | 71   | 170  | 124  | 2.4  | 1.76 | Transcribed locus                                                                                   |
| Les.3667.1.S1_at      | U13054.1   | TC21851 | 1214 | 2906 | 4242 | 2.39 | 3.5  | endo-1,4-beta-glucanase precursor                                                                   |
| LesAffx.52437.1.S1_at | BI925563   | TC23341 | 488  | 1166 | 397  | 2.39 | 0.81 | Transcribed locus, weakly similar to NP_001044627.1 [Oryza sativa (japonica cultivar-group)]        |
| LesAffx.66744.1.S1_at | CN385873   | TC23736 | 1841 | 4392 | 4844 | 2.39 | 2.63 | Xyloglucan endotransglucosylase-hydrolase XTH3                                                      |
| Les.4523.1.S1_at      | AY497475.1 | TC21776 | 760  | 1808 | 1760 | 2.38 | 2.32 | xyloglucan endotransglucosylase-hydrolase XTH5                                                      |
| LesAffx.3467.1.S1_at  | CN384781   | TC23179 | 695  | 1653 | 1638 | 2.38 | 2.36 | Transcribed locus, weakly similar to NP_001047645.1 [Oryza sativa (japonica cultivar-group)]        |
| LesAffx.55476.1.S1_at | BM410473   | TC22139 | 80   | 188  | 139  | 2.36 | 1.75 | Transcribed locus, weakly similar to XP_001084501.1 hypothetical protein isoform 2 [Macaca mulatta] |
| LesAffx.60722.1.S1_at | AW092522   | TC22954 | 521  | 1229 | 968  | 2.36 | 1.86 | Transcribed locus, weakly similar to NP_001046772.1 [Oryza sativa (japonica cultivar-group)]        |
| Les.5916.1.S1_at      | AJ715788.1 | TC23545 | 412  | 971  | 979  | 2.36 | 2.38 | anaerobic basic leucine zipper protein                                                              |
| LesAffx.10955.2.S1_at | BI923362   | TC22366 | 200  | 473  | 232  | 2.36 | 1.16 | Transcribed locus, moderately similar to NP_001043233.1 [Oryza sativa (japonica cultivar-group)]    |
| LesAffx.24042.1.S1_at | CN385197   | DB67876 | 743  | 1748 | 2727 | 2.35 | 3.67 | Transcribed locus, weakly similar to NP_663449.2 P450-like [Mus musculus]                           |
| LesAffx.3467.1.A1_at  | CN384781   | TC23179 | 353  | 827  | 637  | 2.35 | 1.81 | Transcribed locus, weakly similar to NP_001047645.1 [Oryza sativa (japonica cultivar-group)]        |



|                       |            |         |      |      |      |      |      |                                                                                                                   |
|-----------------------|------------|---------|------|------|------|------|------|-------------------------------------------------------------------------------------------------------------------|
| Les.4609.1.S1_at      | BT013258.1 | TC23090 | 382  | 897  | 685  | 2.35 | 1.79 | Lycopersicon esculentum clone 134793F, mRNA sequence                                                              |
| LesAffx.57163.3.A1_at | AI486803   | TC22802 | 171  | 400  | 68   | 2.34 | 0.4  | Transcribed locus, weakly similar to NP_001042186.1 [Oryza sativa (japonica cultivar-group)]                      |
| Les.217.1.S1_at       | AF243180.1 | TC22069 | 723  | 1694 | 2128 | 2.34 | 2.94 | dicyanin                                                                                                          |
| Les.140.1.S1_at       | L08830.1   | TC21735 | 2874 | 6728 | 6488 | 2.34 | 2.26 | glucose-regulated protein 78                                                                                      |
| LesAffx.2934.1.S1_at  | AI775080   | TC22515 | 1419 | 3322 | 2515 | 2.34 | 1.77 | CDNA, clone: FC19BE12, HTC in fruit                                                                               |
| Les.4739.1.S1_at      | AY622990.1 | TC21730 | 2395 | 5594 | 4296 | 2.34 | 1.79 | UDP-glucose:protein transglucosylase-like protein SIUPTG1                                                         |
| Les.5958.1.S1_at      | CN384731   | TC23315 | 566  | 1319 | 1477 | 2.33 | 2.61 | Transcribed locus, weakly similar to NP_998286.2 kinase CKM3 [Danio rerio]                                        |
| LesAffx.51298.1.S1_at | BI422808   | TC21917 | 55   | 129  | 222  | 2.33 | 4.01 | Transcribed locus, weakly similar to NP_001044747.1 [Oryza sativa (japonica cultivar-group)]                      |
| Les.5848.1.A1_at      | BG631837   | TC23527 | 553  | 1287 | 925  | 2.33 | 1.67 | Transcribed locus, weakly similar to XP_001121814.1 similar to CG9009-PA [Apis mellifera]                         |
| LesAffx.22466.1.S1_at | AI774712   | TC23276 | 151  | 352  | 266  | 2.33 | 1.76 | Transcribed locus, weakly similar to NP_001063376.1 [Oryza sativa (japonica cultivar-group)]                      |
| LesAffx.62232.1.S1_at | AW649113   | TC23914 | 43   | 99   | 133  | 2.32 | 3.11 | Transcribed locus, weakly similar to NP_001048167.1 [Oryza sativa (japonica cultivar-group)]                      |
|                       |            |         | 5    | 11   | 6    | 2.32 | 1.34 | ---                                                                                                               |
| LesAffx.10176.1.S1_at | CN385573   | TC22551 | 33   | 76   | 80   | 2.32 | 2.44 | Transcribed locus, weakly similar to NP_001042986.1 [Oryza sativa (japonica cultivar-group)]                      |
| Les.4264.1.A1_s_at    | L24012.1   | TC22590 | 271  | 629  | 358  | 2.32 | 1.32 | gamma-aminobutyrate transaminase subunit precursor isozyme 3                                                      |
| LesAffx.34363.1.S1_at | BE461912   | TC24206 | 59   | 137  | 98   | 2.32 | 1.67 | ---                                                                                                               |
| LesAffx.51285.1.S1_at | CN385118   | TC24451 | 84   | 193  | 234  | 2.3  | 2.78 | ---                                                                                                               |
| Les.31.1.S1_s_at      | AF110518.1 | NP00011 | 897  | 2064 | 1153 | 2.3  | 1.29 | ethylene-inducible CTR1-like protein kinase                                                                       |
| LesAffx.6125.1.S1_at  | CK468687   | TC22217 | 670  | 1541 | 1431 | 2.3  | 2.14 | Transcribed locus, weakly similar to NP_001042057.1 [Oryza sativa (japonica cultivar-group)]                      |
| LesAffx.63189.1.S1_at | BF113930   | TC23356 | 96   | 221  | 206  | 2.3  | 2.15 | Transcribed locus, weakly similar to NP_001042986.1 [Oryza sativa (japonica cultivar-group)]                      |
| Les.1115.1.A1_at      | BG629468   | BG62946 | 22   | 50   | 66   | 2.28 | 3.01 | Transcribed locus                                                                                                 |
| LesAffx.1091.1.S1_at  | BI933005   | TC22991 | 126  | 287  | 242  | 2.28 | 1.92 | Transcribed locus, weakly similar to XP_001115960.1 hydroxysteroid (17-beta) dehydrogenase 8 [Macaca mulatta]     |
| LesAffx.16086.1.S1_at | AI895361   | TC22125 | 165  | 376  | 1193 | 2.28 | 7.24 | Transcribed locus, weakly similar to NP_001045452.1 [Oryza sativa (japonica cultivar-group)]                      |
| LesAffx.32379.1.S1_at | BI421517   | BI42151 | 267  | 607  | 421  | 2.28 | 1.58 | Transcribed locus, weakly similar to NP_001048067.1 [Oryza sativa (japonica cultivar-group)]                      |
| LesAffx.805.1.S1_at   | BI203776   | TC23079 | 869  | 1970 | 2445 | 2.27 | 2.81 | Transcribed locus, weakly similar to XP_001091858.1 DnaJ (Hsp40) homolog, subfamily B, member 11 [Macaca mulatta] |

|                       |            |         |      |      |      |      |       |                                                                                                                            |
|-----------------------|------------|---------|------|------|------|------|-------|----------------------------------------------------------------------------------------------------------------------------|
| Les.4852.1.S1_at      | BT012761.1 | TC22901 | 1289 | 2923 | 3527 | 2.27 | 2.74  | Lycopersicon esculentum clone 113705F, mRNA sequence                                                                       |
| LesAffx.32359.1.S1_at | CK468683   | TC22049 | 554  | 1254 | 1012 | 2.26 | 1.83  | Transcribed locus, weakly similar to NP_001042342.1 [Oryza sativa (japonica cultivar-group)]                               |
| LesAffx.1244.2.A1_at  | CK715642   | TC22520 | 387  | 873  | 1017 | 2.26 | 2.63  | Transcribed locus, moderately similar to NP_001046015.1 [Oryza sativa (japonica cultivar-group)]                           |
| Les.4483.1.S1_at      | AY498713.1 | TC21812 | 1438 | 3225 | 1633 | 2.24 | 1.14  | NAC domain protein                                                                                                         |
| LesAffx.1244.2.S1_at  | CK715642   | TC22520 | 141  | 317  | 308  | 2.24 | 2.18  | Transcribed locus, moderately similar to NP_001046015.1 [Oryza sativa (japonica cultivar-group)]                           |
| Les.5152.1.S1_at      | BT013393.1 | TC24469 | 338  | 756  | 794  | 2.24 | 2.35  | Lycopersicon esculentum clone 135647R, mRNA sequence                                                                       |
| LesAffx.344.3.S1_at   | BI921701   | TC21769 | 267  | 597  | 641  | 2.24 | 2.4   | Transcribed locus, weakly similar to NP_190972.1 protein [Arabidopsis thaliana]                                            |
| LesAffx.63739.1.S1_at | AW033134   | TC21965 | 491  | 1096 | 860  | 2.23 | 1.75  | Transcribed locus, weakly similar to NP_001043665.1 [Oryza sativa (japonica cultivar-group)]                               |
| LesAffx.13053.1.S1_at | AW032379   | TC22409 | 531  | 1183 | 1008 | 2.23 | 1.9   | Transcribed locus, weakly similar to XP_001108084.1 similar to aldehyde dehydrogenase 1 family, member L1 [Macaca mulatta] |
| Les.5711.1.S1_at      | BT014429.1 | TC21831 | 276  | 615  | 1194 | 2.23 | 4.32  | Lycopersicon esculentum clone 133747F, mRNA sequence                                                                       |
| LesAffx.61012.2.S1_at | BG132173   | TC23271 | 188  | 418  | 510  | 2.23 | 2.72  | Transcribed locus, weakly similar to NP_001042750.1 [Oryza sativa (japonica cultivar-group)]                               |
| LesAffx.71532.1.S1_at | AI772343   | TC22607 | 2245 | 4996 | 4262 | 2.22 | 1.9   | Transcribed locus, weakly similar to NP_001041930.1 [Oryza sativa (japonica cultivar-group)]                               |
| Les.5177.1.S1_at      | BT013446.1 | TC24190 | 29   | 65   | 422  | 2.22 | 14.47 | Lycopersicon esculentum clone 132101F, mRNA sequence                                                                       |
| Les.4105.1.A1_at      | BG735198   | BG73519 | 3    | 7    | 4    | 2.22 | 1.11  | Transcribed locus                                                                                                          |
| Les.4934.1.S1_at      | BT012932.1 | TC22421 | 104  | 231  | 288  | 2.22 | 2.77  | Lycopersicon esculentum clone 114095R, mRNA sequence                                                                       |
| LesAffx.1244.1.S1_at  | BG126114   | TC22939 | 327  | 723  | 847  | 2.21 | 2.59  | Transcribed locus, moderately similar to NP_001046015.1 [Oryza sativa (japonica cultivar-group)]                           |
| LesAffx.59059.2.S1_at | AW651016   | TC22426 | 211  | 466  | 398  | 2.21 | 1.89  | Transcribed locus, weakly similar to NP_001048067.1 [Oryza sativa (japonica cultivar-group)]                               |
| LesAffx.10955.1.S1_at | BI422058   | TC22366 | 247  | 547  | 271  | 2.21 | 1.1   | Transcribed locus, moderately similar to NP_001043233.1 [Oryza sativa (japonica cultivar-group)]                           |
| Les.3155.1.S1_at      | BT013204.1 | TC21967 | 614  | 1355 | 1476 | 2.21 | 2.4   | Lycopersicon esculentum clone 134378F, mRNA sequence                                                                       |
| Les.3545.1.S1_at      | Y14809.1   | TC22310 | 1481 | 3266 | 1655 | 2.21 | 1.12  | beta-carotene hydroxylase                                                                                                  |
| Les.3018.1.S1_at      | BT013902.1 | TC22606 | 3263 | 7196 | 6124 | 2.21 | 1.88  | Lycopersicon esculentum clone 132899F, mRNA sequence                                                                       |
| LesAffx.14542.1.S1_at | AW647748   |         | 14   | 31   | 26   | 2.2  | 1.83  | ---                                                                                                                        |
| LesAffx.48836.1.S1_at | AW623752   | TC23087 | 84   | 185  | 175  | 2.2  | 2.09  | ---                                                                                                                        |
| Les.3833.1.S1_at      | AY098737.2 | TC22193 | 228  | 500  | 785  | 2.2  | 3.45  | TAGL12 transcription factor                                                                                                |
| LesAffx.58365.1.S1_at | BM536079   | TC22511 | 263  | 577  | 596  | 2.2  | 2.26  | ---                                                                                                                        |

|                       |            |         |      |      |      |      |       |                                                                                                                       |
|-----------------------|------------|---------|------|------|------|------|-------|-----------------------------------------------------------------------------------------------------------------------|
| LesAffx.49321.1.S1_at | AI486965   | TC22769 | 19   | 42   | 30   | 2.19 | 1.54  | Transcribed locus, weakly similar to NP_001045292.1 [Oryza sativa (japonica cultivar-group)]                          |
| Les.63.1.S1_at        | AF049900.1 | TC22864 | 67   | 146  | 730  | 2.19 | 10.97 | gibberellin 20-oxidase-3                                                                                              |
| Les.5044.1.S1_at      | BT013168.1 | TC22109 | 929  | 2029 | 2574 | 2.18 | 2.77  | Lycopersicon esculentum clone 134231R, mRNA sequence                                                                  |
| Les.2073.1.S1_at      | BM410320   | TC23644 | 1880 | 4097 | 2576 | 2.18 | 1.37  | Transcribed locus, weakly similar to XP_001105883.1 similar to CG7222-PA isoform 2 [Macaca mulatta]                   |
| LesAffx.56137.1.A1_at | AI490099   | TC22599 | 109  | 236  | 732  | 2.17 | 6.72  | Transcribed locus, weakly similar to NP_001041909.1 [Oryza sativa (japonica cultivar-group)]                          |
| Les.1568.1.A1_at      | BG626849   | TC24275 | 22   | 47   | 52   | 2.17 | 2.43  | Transcribed locus                                                                                                     |
| Les.5130.1.S1_at      | BT013342.1 | TC23433 | 148  | 320  | 445  | 2.16 | 3     | Lycopersicon esculentum clone 135145F, mRNA sequence                                                                  |
| Les.4067.1.S1_at      | AY240231.1 | TC22590 | 1399 | 3023 | 1970 | 2.16 | 1.41  | gamma-aminobutyrate transaminase subunit precursor isozyme 3                                                          |
| LesAffx.12670.3.S1_at | BF113197   | TC22012 | 82   | 176  | 100  | 2.15 | 1.23  | Transcribed locus, weakly similar to NP_001042749.1 [Oryza sativa (japonica cultivar-group)]                          |
| LesAffx.18686.1.S1_at | BI203812   | TC22685 | 33   | 70   | 214  | 2.15 | 6.57  | Transcribed locus, weakly similar to NP_001043492.1 [Oryza sativa (japonica cultivar-group)]                          |
| Les.2817.2.S1_at      | BI933507   | TC24089 | 250  | 538  | 454  | 2.15 | 1.82  | Transcribed locus, weakly similar to XP_001108114.1 similar to ATP citrate lyase isoform 1 isoform 2 [Macaca mulatta] |
| LesAffx.50466.1.S1_at | AI780511   | TC23061 | 584  | 1255 | 1340 | 2.15 | 2.3   | CDNA, clone: FC02AC08, HTC in fruit                                                                                   |
| Les.2817.1.S1_at      | BF050945   | TC24089 | 1462 | 3144 | 2460 | 2.15 | 1.68  | Transcribed locus, weakly similar to XP_001108114.1 similar to ATP citrate lyase isoform 1 isoform 2 [Macaca mulatta] |
| Les.254.1.S1_at       | AY081905.1 | TC21784 | 411  | 883  | 1022 | 2.15 | 2.49  | N-hydroxycinnamoyl-CoA:tyramine N-hydroxycinnamoyl transferase THT1-3                                                 |
| LesAffx.58193.1.S1_at | CK715571   | TC23961 | 311  | 667  | 344  | 2.14 | 1.11  | Transcribed locus, weakly similar to NP_001049863.1 [Oryza sativa (japonica cultivar-group)]                          |
| LesAffx.51158.2.A1_at | AI898095   | TC23014 | 140  | 301  | 199  | 2.14 | 1.42  | Transcribed locus, weakly similar to NP_001048008.1 [Oryza sativa (japonica cultivar-group)]                          |
| LesAffx.3460.1.S1_at  | CN384958   | EG55377 | 129  | 275  | 373  | 2.14 | 2.9   | ---                                                                                                                   |
| Les.4803.1.S1_at      | BT013418.1 | TC21851 | 98   | 210  | 149  | 2.13 | 1.52  | Lycopersicon esculentum clone 132056R, mRNA sequence                                                                  |
| LesAffx.60242.1.S1_at | BI207558   | TC23660 | 337  | 717  | 666  | 2.13 | 1.98  | Transcribed locus, moderately similar to NP_001058564.1 [Oryza sativa (japonica cultivar-group)]                      |
| Les.1054.1.S1_at      | BM412386   | TC21841 | 753  | 1604 | 1151 | 2.13 | 1.53  | Transcribed locus, weakly similar to XP_001121618.1 similar to CG10621-PA [Apis mellifera]                            |
| Les.2988.1.S1_at      | CK715255   | TC22567 | 2275 | 4838 | 1845 | 2.13 | 0.81  | Sucrose transporter                                                                                                   |
| Les.3543.1.S1_at      | AJ011914.1 | TC23261 | 97   | 207  | 163  | 2.12 | 1.68  | THY5 protein                                                                                                          |
| Les.3526.1.S1_a_at    | AF198259.1 | TC22267 | 641  | 1360 | 1071 | 2.12 | 1.67  | calmodulin-binding diacylglycerol kinase                                                                              |
| LesAffx.62131.1.S1_at | BE437087   | TC23252 | 1288 | 2730 | 939  | 2.12 | 0.73  | Transcribed locus, weakly similar to XP_001081745.1 similar to threonine aldolase 1 [Rattus norvegicus]               |

|                       |            |         |      |      |      |      |      |                                                                                                                                                |
|-----------------------|------------|---------|------|------|------|------|------|------------------------------------------------------------------------------------------------------------------------------------------------|
| LesAffx.69747.1.S1_at | BM536068   | TC21831 | 1291 | 2732 | 2601 | 2.12 | 2.01 | Transcribed locus, weakly similar to NP_001042241.1 [Oryza sativa (japonica cultivar-group)]                                                   |
| LesAffx.70928.1.S1_at | BI209612   | TC23336 | 913  | 1932 | 1916 | 2.12 | 2.1  | Transcribed locus, moderately similar to NP_001044227.1 [Oryza sativa (japonica cultivar-group)]                                               |
| Les.960.1.A1_at       | BG628420   | BG62842 | 95   | 201  | 138  | 2.11 | 1.46 | Transcribed locus                                                                                                                              |
| Les.3693.1.S1_at      | AF426174.1 | TC22813 | 368  | 777  | 1117 | 2.11 | 3.03 | blind                                                                                                                                          |
| LesAffx.66163.1.S1_at | AW222774   | TC22788 | 418  | 881  | 947  | 2.11 | 2.27 | Transcribed locus, weakly similar to NP_001046543.1 [Oryza sativa (japonica cultivar-group)]                                                   |
| Les.2688.1.S1_at      | AJ560646.1 | TC21917 | 268  | 565  | 2173 | 2.11 | 8.1  | expansin11                                                                                                                                     |
| LesAffx.15850.1.S1_at | AW030423   | TC23653 | 391  | 825  | 1072 | 2.11 | 2.74 | Transcribed locus, weakly similar to NP_001046323.1 [Oryza sativa (japonica cultivar-group)]                                                   |
| Les.1897.1.A1_at      | BG630037   | TC22522 | 55   | 115  | 103  | 2.11 | 1.87 | Transcribed locus, weakly similar to NP_001064869.1 [Oryza sativa (japonica cultivar-group)]                                                   |
| LesAffx.51554.1.S1_at | AW093474   | GO37601 | 989  | 2083 | 817  | 2.11 | 0.83 | ---                                                                                                                                            |
| LesAffx.51554.1.A1_at | AW093474   | GO37601 | 722  | 1520 | 460  | 2.11 | 0.64 | ---                                                                                                                                            |
| LesAffx.60006.1.S1_at | BG643009   | TC22674 | 246  | 517  | 738  | 2.1  | 3    | Transcribed locus, weakly similar to NP_001055441.1 [Oryza sativa (japonica cultivar-group)]                                                   |
| LesAffx.3244.2.S1_at  | CD002790   | TC22222 | 501  | 1055 | 1504 | 2.1  | 3    | Transcribed locus, weakly similar to NP_001045327.1 [Oryza sativa (japonica cultivar-group)]                                                   |
| Les.2137.1.S1_at      | AY359965.1 | TC21714 | 1105 | 2321 | 2264 | 2.1  | 2.05 | EIX receptor 1                                                                                                                                 |
| Les.3186.1.S1_at      | BG123422   | TC22761 | 21   | 45   | 36   | 2.1  | 1.69 | Transcribed locus                                                                                                                              |
| Les.244.2.S1_at       | AI485696   | TC22935 | 112  | 235  | 175  | 2.09 | 1.56 | Calmodulin                                                                                                                                     |
| LesAffx.63980.1.S1_at | AI780160   | TC22905 | 418  | 874  | 854  | 2.09 | 2.04 | Transcribed locus, weakly similar to NP_001048257.1 [Oryza sativa (japonica cultivar-group)]                                                   |
| LesAffx.69306.1.S1_at | BI203295   | TC23093 | 104  | 218  | 210  | 2.09 | 2.02 | Transcribed locus, weakly similar to NP_849966.2 protein [Arabidopsis thaliana]                                                                |
| Les.4140.1.S1_at      | AY192367.1 | TC22892 | 905  | 1877 | 1125 | 2.07 | 1.24 | Lycopersicon esculentum clone 134153F, mRNA sequence                                                                                           |
| Les.1429.1.A1_at      | BG631546   | BG63154 | 82   | 171  | 104  | 2.07 | 1.26 | Transcribed locus                                                                                                                              |
| LesAffx.69808.1.S1_at | CN385324   | TC22525 | 42   | 87   | 94   | 2.07 | 2.25 | Transcribed locus, weakly similar to NP_001043374.1 [Oryza sativa (japonica cultivar-group)]                                                   |
| Les.1054.2.S1_at      | BE436393   | TC23657 | 900  | 1864 | 1431 | 2.07 | 1.59 | Transcribed locus, weakly similar to XP_001121618.1 similar to CG10621-PA [Apis mellifera]                                                     |
| Les.3610.1.S1_at      | BG629712   | TC23477 | 78   | 161  | 770  | 2.07 | 9.89 | glycine rich protein                                                                                                                           |
| LesAffx.43793.1.A1_at | BI206057   | TC23097 | 53   | 109  | 120  | 2.07 | 2.28 | Transcribed locus, weakly similar to XP_001113600.1 KDEL (Lys-Asp-Glu-Leu) endoplasmic reticulum protein retention receptor 1 [Macaca mulatta] |
| LesAffx.71660.2.S1_at | AW218025   | TC24516 | 3    | 5    | 3    | 2.06 | 0.99 | ---                                                                                                                                            |
| Les.5917.1.S1_at      | AJ715790.1 | TC21740 | 3582 | 7368 | 8653 | 2.06 | 2.42 | 1-aminocyclopropane-1-carboxylate oxidase                                                                                                      |

|                       |            |         |      |      |      |      |      |                                                                                                                                                                     |
|-----------------------|------------|---------|------|------|------|------|------|---------------------------------------------------------------------------------------------------------------------------------------------------------------------|
| LesAffx.42809.1.S1_at | AW041173   | AW04117 | 10   | 21   | 16   | 2.06 | 1.53 | ---                                                                                                                                                                 |
| Les.23.1.S1_at        | AF011555.1 | TC22224 | 2430 | 4998 | 3993 | 2.06 | 1.64 | jasmonic acid 2                                                                                                                                                     |
| LesAffx.58193.1.A1_at | CK715571   | TC23961 | 666  | 1370 | 857  | 2.06 | 1.29 | Transcribed locus, weakly similar to NP_001049863.1 [Oryza sativa (japonica cultivar-group)]                                                                        |
| Les.3493.1.S1_at      | AY013255.1 | TC21805 | 800  | 1645 | 1229 | 2.05 | 1.54 | phospholipase PLDb1                                                                                                                                                 |
| LesAffx.63074.1.A1_at | CN385213   | TC22246 | 147  | 302  | 217  | 2.05 | 1.48 | Transcribed locus, weakly similar to NP_001047524.1 [Oryza sativa (japonica cultivar-group)]                                                                        |
| LesAffx.2226.1.S1_at  | BI422950   | TC23401 | 352  | 724  | 817  | 2.05 | 2.32 | Transcribed locus, moderately similar to XP_001100144.1 similar to ribonucleotide reductase M2 B (TP53 inducible) isoform 3 [Macaca mulatta]                        |
| LesAffx.10495.1.S1_at | AW035719   | TC23875 | 437  | 896  | 767  | 2.05 | 1.76 | Transcribed locus, weakly similar to XP_001098727.1 similar to lactate dehydrogenase A-like 6B [Macaca mulatta]                                                     |
| Les.4518.3.A1_at      | BG734737   | TC22852 | 850  | 1739 | 1892 | 2.05 | 2.23 | Transcribed locus, moderately similar to XP_001085048.1 similar to 60S ribosomal protein L37a [Macaca mulatta]                                                      |
| Les.5293.1.S1_at      | BT013651.1 | AW09681 | 791  | 1619 | 1139 | 2.05 | 1.44 | Lycopersicon esculentum clone 132458F, mRNA sequence                                                                                                                |
| LesAffx.9245.1.S1_at  | BE463039   | TC24138 | 976  | 1996 | 1880 | 2.04 | 1.93 | CDNA, clone: FC03AB07, HTC in fruit                                                                                                                                 |
| LesAffx.37916.1.S1_at | BM536108   | TC23806 | 81   | 165  | 243  | 2.04 | 2.98 | Transcribed locus, weakly similar to NP_001048479.1 [Oryza sativa (japonica cultivar-group)]                                                                        |
| Les.2667.2.S1_at      | AW621251   | TC22610 | 3090 | 6286 | 4519 | 2.03 | 1.46 | Transcribed locus, weakly similar to NP_001042221.1 [Oryza sativa (japonica cultivar-group)]                                                                        |
| LesAffx.32379.2.S1_at | AI896619   | BI42151 | 222  | 452  | 327  | 2.03 | 1.47 | Transcribed locus, weakly similar to NP_001048067.1 [Oryza sativa (japonica cultivar-group)]                                                                        |
| Les.638.1.S1_at       | BT012771.1 | TC21816 | 2837 | 5763 | 5816 | 2.03 | 2.05 | Lycopersicon esculentum clone 113749F, mRNA sequence                                                                                                                |
| Les.4895.1.S1_at      | BT012856.1 | TC23595 | 2066 | 4196 | 2688 | 2.03 | 1.3  | Lycopersicon esculentum clone 113942F, mRNA sequence                                                                                                                |
| LesAffx.22812.2.S1_at | BI204920   | TC22300 | 150  | 304  | 167  | 2.03 | 1.12 | Transcribed locus, weakly similar to NP_001061950.1 [Oryza sativa (japonica cultivar-group)]                                                                        |
| LesAffx.22100.1.S1_at | AW216933   | TC22078 | 204  | 413  | 490  | 2.03 | 2.41 | Transcribed locus, weakly similar to XP_001061027.1 similar to Heat shock factor protein 1 (HSF 1) (Heat shock transcription factor 1) (HSTF 1) [Rattus norvegicus] |
| Les.3759.1.S1_at      | Z46654.1   | TC21776 | 1038 | 2103 | 2358 | 2.03 | 2.27 | late embryogenesis (Lea)-like protein                                                                                                                               |
| LesAffx.56070.1.S1_at | BF113259   | TC23846 | 580  | 1174 | 933  | 2.02 | 1.61 | Transcribed locus, weakly similar to NP_001043915.1 [Oryza sativa (japonica cultivar-group)]                                                                        |
| LesAffx.57454.1.S1_at | BI923132   | TC22139 | 2    | 4    | 3    | 2.02 | 1.76 | ---                                                                                                                                                                 |
| LesAffx.62967.1.S1_at | BG128004   | TC21896 | 56   | 113  | 226  | 2.02 | 4.05 | Transcribed locus, weakly similar to XP_001109440.1 similar to calmodulin 1 [Macaca mulatta]                                                                        |
| LesAffx.15898.1.S1_at | AW649847   | TC21728 | 2371 | 4792 | 4654 | 2.02 | 1.96 | Transcribed locus, weakly similar to NP_001047054.1 [Oryza sativa (japonica cultivar-group)]                                                                        |
| LesAffx.15898.1.S1_at | AW649847   | TC21728 | 731  | 1478 | 909  | 2.02 | 1.24 | UDP-xylose phenolic glycosyltransferase                                                                                                                             |

|                       |            |         |      |      |      |      |      |                                                                                                           |
|-----------------------|------------|---------|------|------|------|------|------|-----------------------------------------------------------------------------------------------------------|
| LesAffx.20391.1.S1_at | BF176422   | TC22123 | 349  | 703  | 488  | 2.02 | 1.4  | Transcribed locus, weakly similar to NP_001062790.1 [Oryza sativa (japonica cultivar-group)]              |
| Les.176.1.S1_at       | U38464.1   | TC21796 | 4001 | 8063 | 7407 | 2.02 | 1.85 | small GTP-binding protein                                                                                 |
| LesAffx.64861.1.S1_at | BG127249   | TC22312 | 222  | 446  | 386  | 2.02 | 1.74 | Transcribed locus, weakly similar to NP_065724.1 protein RAB-22A [Homo sapiens]                           |
| Les.1238.2.A1_at      | BG630266   | TC23474 | 79   | 159  | 149  | 2.01 | 1.89 | Transcribed locus, weakly similar to NP_001042653.1 [Oryza sativa (japonica cultivar-group)]              |
| LesAffx.51285.1.A1_at | CN385118   | TC24451 | 46   | 93   | 98   | 2.01 | 2.13 | ---                                                                                                       |
| Les.3289.1.S1_at      | AY240229.1 | TC21835 | 3304 | 6640 | 5264 | 2.01 | 1.59 | gamma-aminobutyrate transaminase subunit precursor isozyme 1                                              |
| Les.4510.3.A1_at      | AI777050   | TC24158 | 15   | 30   | 27   | 2.01 | 1.84 | Transcribed locus, weakly similar to XP_001108187.1 similar to 40S ribosomal protein S25 [Macaca mulatta] |
| LesAffx.22297.1.S1_at | AW041000   | TC21723 | 734  | 1473 | 1089 | 2.01 | 1.48 | CYP710A7 mRNA for sterol 22-desaturase                                                                    |
| LesAffx.47529.1.S1_at | BG131749   | TC24163 | 60   | 121  | 92   | 2.01 | 1.53 | ---                                                                                                       |
| LesAffx.63074.1.S1_at | AW217297   | TC22246 | 172  | 345  | 309  | 2.01 | 1.8  | Transcribed locus, weakly similar to NP_001047524.1 [Oryza sativa (japonica cultivar-group)]              |
| Les.797.1.S1_at       | X92854.1   | TC24488 | 734  | 1470 | 1803 | 2    | 2.46 | Exon 1 of AMT1 gene                                                                                       |
| LesAffx.51274.1.S1_at | CN385340   | TC22133 | 255  | 510  | 574  | 2    | 2.25 | Transcribed locus, moderately similar to NP_001044266.1 [Oryza sativa (japonica cultivar-group)]          |
| LesAffx.56137.1.S1_at | AI490099   | TC22599 | 452  | 904  | 3059 | 2    | 6.77 | Transcribed locus, weakly similar to NP_001041909.1 [Oryza sativa (japonica cultivar-group)]              |
| Les.1159.1.S1_at      | AW096608   | TC23740 | 146  | 291  | 284  | 2    | 1.95 | Transcribed locus, weakly similar to NP_190772.1 protein [Arabidopsis thaliana]                           |
|                       |            |         | 2    | 3    | 2    | 2    | 1.04 | ---                                                                                                       |
| Les.5481.1.A1_at      | BT014001.1 | TC21763 | 651  | 1301 | 1193 | 2    | 1.83 | Lycopersicon esculentum clone 133050F, mRNA sequence                                                      |
| LesAffx.26180.1.S1_at | BG132890   | BG13289 | 58   | 116  | 255  | 2    | 4.37 | ---                                                                                                       |
| LesAffx.59842.1.S1_at | BI205718   | TC21823 | 140  | 147  | 947  | 1.05 | 6.75 | Transcribed locus, weakly similar to NP_001042297.1 [Oryza sativa (japonica cultivar-group)]              |
| Les.3625.1.S1_at      | L22188.1   | TC23715 | 613  | 568  | 3444 | 0.93 | 5.62 | RSI-1 protein                                                                                             |
| LesAffx.65135.1.S1_at | CK468698   | TC23660 | 23   | 29   | 122  | 1.24 | 5.24 | Transcribed locus                                                                                         |
| Les.1397.1.A1_at      | BG631327   | BG63132 | 226  | 186  | 1128 | 0.82 | 4.99 | Transcribed locus, weakly similar to NP_001042152.1 [Oryza sativa (japonica cultivar-group)]              |
| Les.50.1.S1_at        | X79338.1   | TC22030 | 521  | 936  | 2395 | 1.79 | 4.59 | ribonuclease                                                                                              |
| Les.191.1.S1_at       | AF548376.1 | TC21771 | 557  | 377  | 2516 | 0.68 | 4.52 | expansin                                                                                                  |
| Les.1.1.S1_at         | AF154421.1 | TC21715 | 1409 | 1879 | 6050 | 1.33 | 4.29 | beta-galactosidase                                                                                        |
| LesAffx.51483.1.A1_at | CK348350   | CK34835 | 22   | 18   | 91   | 0.83 | 4.17 | ---                                                                                                       |
| LesAffx.39466.1.S1_at | BI203178   | TC24216 | 176  | 306  | 706  | 1.74 | 4.02 | ---                                                                                                       |
| Les.4693.1.S1_at      | M69247.1   | TC23231 | 253  | 268  | 967  | 1.06 | 3.83 | pathogenesis-related protein P4                                                                           |

|                       |            |         |      |      |      |      |      |                                                                                                        |
|-----------------------|------------|---------|------|------|------|------|------|--------------------------------------------------------------------------------------------------------|
| Les.3396.2.S1_at      | AW221386   | TC22284 | 1524 | 2733 | 5814 | 1.79 | 3.81 | Transcribed locus, weakly similar to NP_001042402.1 [Oryza sativa (japonica cultivar-group)]           |
| Les.5960.1.S1_at      | AY731066.1 | TC22652 | 775  | 1013 | 2890 | 1.31 | 3.73 | LeTIP protein                                                                                          |
| Les.3042.2.S1_at      | AW934591   | BE46335 | 168  | 325  | 613  | 1.93 | 3.65 | Transcribed locus, weakly similar to NP_001062055.1 [Oryza sativa (japonica cultivar-group)]           |
| LesAffx.59625.1.S1_at | BI204607   | TC22866 | 176  | 248  | 628  | 1.41 | 3.57 | Transcribed locus, weakly similar to NP_001049721.1 [Oryza sativa (japonica cultivar-group)]           |
| Les.3707.1.S1_at      | AF022013.1 | TC24298 | 51   | 43   | 182  | 0.84 | 3.56 | IAA2 protein                                                                                           |
| LesAffx.59592.1.S1_at | BI210118   | TC22019 | 20   | 14   | 69   | 0.68 | 3.5  | Transcribed locus, weakly similar to NP_065956.1 dehydrogenase 14 (all-trans and 9-cis) [Homo sapiens] |
| LesAffx.37714.1.A1_at | CK720577   | TC24072 | 36   | 47   | 124  | 1.32 | 3.45 | Transcribed locus, weakly similar to NP_001046387.1 [Oryza sativa (japonica cultivar-group)]           |
| LesAffx.68092.1.S1_at | BE459012   | TC22815 | 265  | 490  | 914  | 1.85 | 3.45 | Transcribed locus, weakly similar to NP_001044783.1 [Oryza sativa (japonica cultivar-group)]           |
| Les.4346.1.S1_at      | AF020390.2 | TC21717 | 756  | 618  | 2605 | 0.82 | 3.44 | ss-galactosidase                                                                                       |
| LesAffx.63172.1.S1_at | AW031388   | TC22898 | 338  | 611  | 1158 | 1.81 | 3.43 | Transcribed locus, moderately similar to NP_001044907.1 [Oryza sativa (japonica cultivar-group)]       |
| Les.4026.1.S1_at      | AY155579.1 | TC21731 | 1006 | 1674 | 3436 | 1.66 | 3.42 | xyloglucan-specific fungal endoglucanase inhibitor protein precursor                                   |
| Les.3583.1.A1_at      | Y15846.1   | TC22445 | 94   | 96   | 316  | 1.01 | 3.34 | TSI-1 protein                                                                                          |
| Les.3700.1.S1_at      | AY026343.1 | TC22149 | 439  | 519  | 1466 | 1.18 | 3.34 | Lycopersicon esculentum non-symbiotic hemoglobin class 1 (Glb1)                                        |
| LesAffx.68294.1.S1_at | BM408981   | TC22580 | 95   | 83   | 316  | 0.88 | 3.33 | Transcribed locus, weakly similar to NP_001046934.1 [Oryza sativa (japonica cultivar-group)]           |
| Les.3396.1.A1_at      | AW224542   | TC22094 | 1086 | 1841 | 3599 | 1.69 | 3.31 | Transcribed locus, weakly similar to NP_001042402.1 [Oryza sativa (japonica cultivar-group)]           |
| LesAffx.62690.1.S1_at | BI206793   | TC22770 | 352  | 688  | 1155 | 1.96 | 3.28 | Transcribed locus, weakly similar to NP_001043439.1 [Oryza sativa (japonica cultivar-group)]           |
| Les.3706.1.S1_at      | AF022014.1 | TC21953 | 298  | 313  | 943  | 1.05 | 3.17 | IAA3 protein                                                                                           |
| LesAffx.59622.1.S1_at | BI210866   | TC22863 | 377  | 469  | 1190 | 1.24 | 3.16 | Transcribed locus, weakly similar to NP_565922.1 (EARLY FLOWERING 4) [Arabidopsis thaliana]            |
| LesAffx.60109.1.S1_at | BI204244   | TC22478 | 696  | 672  | 2191 | 0.97 | 3.15 | Transcribed locus, weakly similar to NP_001042055.1 [Oryza sativa (japonica cultivar-group)]           |
| Les.4317.1.S1_at      | AW625684   | TC23953 | 2359 | 4290 | 7220 | 1.82 | 3.06 | asparagine synthetase                                                                                  |
| Les.4718.1.S1_at      | BT013487.1 | BI92390 | 407  | 472  | 1235 | 1.16 | 3.04 | Lycopersicon esculentum clone 132171F, mRNA sequence                                                   |
| Les.3669.1.S1_at      | L19762.1   | TC21717 | 501  | 486  | 1505 | 0.97 | 3    | sucrose synthase                                                                                       |
| Les.4948.1.S1_at      | BT012962.1 | TC23041 | 252  | 462  | 726  | 1.84 | 2.89 | Lycopersicon esculentum clone 114152R, mRNA sequence                                                   |
| Les.4873.1.S1_at      | BT012806.1 | TC23935 | 634  | 799  | 1828 | 1.26 | 2.88 | Lycopersicon esculentum clone 113825R, mRNA sequence                                                   |

|                         |            |         |      |      |      |      |      |                                                                                                                            |
|-------------------------|------------|---------|------|------|------|------|------|----------------------------------------------------------------------------------------------------------------------------|
| Les.3042.1.S1_at        | BI926173   | TC23899 | 65   | 115  | 185  | 1.76 | 2.85 | Transcribed locus, weakly similar to NP_001062055.1 [Oryza sativa (japonica cultivar-group)]                               |
| LesAffx.34771.1.S1_at   | AW930136   | AW93013 | 643  | 888  | 1832 | 1.38 | 2.85 | ---                                                                                                                        |
| Les.1044.1.A1_at        | BG629030   | TC23609 | 121  | 112  | 342  | 0.93 | 2.84 | Transcribed locus                                                                                                          |
| Les.4976.1.S1_at        | BT013033.1 | TC22335 | 273  | 306  | 771  | 1.12 | 2.82 | Lycopersicon esculentum clone 114281R, mRNA sequence                                                                       |
| LesAffx.15953.1.S1_at   | AW033344   | TC23158 | 34   | 54   | 97   | 1.57 | 2.81 | Transcribed locus, weakly similar to NP_181965.1 protein [Arabidopsis thaliana]                                            |
| Les.5597.1.S1_at        | BT014226.1 | AW09450 | 49   | 55   | 138  | 1.12 | 2.81 | Lycopersicon esculentum clone 133421F, mRNA sequence                                                                       |
| Les.2642.1.S1_at        | CN384581   | TC22309 | 3005 | 5095 | 8423 | 1.7  | 2.8  | CDNA, clone: FC01AD09, HTC in fruit                                                                                        |
| LesAffx.344.10.S1_at    | AI773570   | AI77357 | 1106 | 1678 | 3085 | 1.52 | 2.79 | Transcribed locus, weakly similar to XP_001089325.1 similar to cellular repressor of E1A-stimulated genes [Macaca mulatta] |
| Les.4625.1.S1_at        | BT013972.1 | AW03556 | 1365 | 2569 | 3793 | 1.88 | 2.78 | Lycopersicon esculentum clone 133016F, mRNA sequence                                                                       |
| Les.3460.1.S1_at        | AF506005.1 | TC21723 | 1409 | 2386 | 3907 | 1.69 | 2.77 | acid invertase                                                                                                             |
| Les.909.1.A1_at         | BG628078   | TC23979 | 31   | 42   | 83   | 1.36 | 2.74 | Transcribed locus                                                                                                          |
| Les.5343.1.S1_at        | BT013743.1 |         | 85   | 103  | 231  | 1.21 | 2.72 | Lycopersicon esculentum clone 132606R, mRNA sequence                                                                       |
| Les.2643.1.S1_at        | BG128842   | TC23690 | 234  | 350  | 635  | 1.5  | 2.71 | Transcribed locus                                                                                                          |
| LesAffx.62690.2.S1_at   | CD003021   | CD00302 | 738  | 1315 | 2001 | 1.78 | 2.71 | Transcribed locus, weakly similar to NP_001043439.1 [Oryza sativa (japonica cultivar-group)]                               |
| Les.2616.1.A1_at        | BG628893   | TC23909 | 142  | 142  | 386  | 1    | 2.71 | Transcribed locus, weakly similar to NP_565764.1 protein [Arabidopsis thaliana]                                            |
| Les.4040.1.S1_at        | X83420.1   | AW09681 | 2105 | 3902 | 5691 | 1.85 | 2.7  | Alu I-fragment                                                                                                             |
| LesAffx.57437.1.S1_at   | BI928709   | TC21886 | 366  | 577  | 980  | 1.58 | 2.68 | Transcribed locus, weakly similar to NP_001042998.1 [Oryza sativa (japonica cultivar-group)]                               |
| Les.3663.1.S1_at        | X55193.1   | TC22989 | 385  | 219  | 1023 | 0.57 | 2.66 | 9612 protein                                                                                                               |
| LesAffx.17387.1.S1_at   | BM534931   | BM53493 | 430  | 831  | 1138 | 1.93 | 2.65 | ---                                                                                                                        |
| LesAffx.65882.1.S1_at   | BG129533   | TC23537 | 91   | 86   | 240  | 0.94 | 2.64 | Transcribed locus, weakly similar to NP_567804.1 protein [Arabidopsis thaliana]                                            |
| LesAffx.69492.1.S1_at   | AW443978   | AW44397 | 30   | 33   | 80   | 1.09 | 2.64 | ---                                                                                                                        |
| LesAffx.36979.1.S1_at   | AI775450   | TC22380 | 430  | 784  | 1134 | 1.82 | 2.64 | Transcribed locus, weakly similar to XP_001104766.1 calmodulin-like 5 [Macaca mulatta]                                     |
| LesAffx.15850.1.S1_a_at | AW030423   | TC23653 | 122  | 202  | 319  | 1.65 | 2.61 | Transcribed locus, weakly similar to NP_001046323.1 [Oryza sativa (japonica cultivar-group)]                               |
| Les.4383.1.S1_at        | M21775.1   | BM41072 | 32   | 38   | 82   | 1.2  | 2.59 | fruit-specific protein                                                                                                     |
| LesAffx.7894.1.S1_at    | AW933852   | TC23795 | 1011 | 1110 | 2598 | 1.1  | 2.57 | Transcribed locus, weakly similar to XP_001091674.1 similar to aspartate aminotransferase 2 precursor [Macaca mulatta]     |
| Les.3597.1.S1_at        | S40549.1   | TC22411 | 956  | 492  | 2449 | 0.51 | 2.56 | deoxyuridine triphosphatase                                                                                                |
| Les.3415.3.S1_at        | AI779314   | TC24218 | 765  | 578  | 1947 | 0.76 | 2.54 | CDNA, clone: FC24DE01, HTC in fruit                                                                                        |
| LesAffx.3244.1.S1_at    | BI934720   | TC22222 | 951  | 1803 | 2414 | 1.9  | 2.54 | Transcribed locus, weakly similar to NP_001045327.1 [Oryza sativa (japonica cultivar-group)]                               |



|                       |            |         |      |      |      |      |      |                                                                                                           |
|-----------------------|------------|---------|------|------|------|------|------|-----------------------------------------------------------------------------------------------------------|
| Les.1350.1.A1_at      | BG631017   | TC24319 | 83   | 60   | 210  | 0.72 | 2.51 | Transcribed locus                                                                                         |
| Les.3232.1.A1_at      | BG627277   | TC21879 | 146  | 159  | 367  | 1.09 | 2.51 | Transcribed locus, weakly similar to NP_001043730.1 [Oryza sativa (japonica cultivar-group)]              |
| Les.4501.1.S1_at      | CK468710   | TC24359 | 490  | 654  | 1223 | 1.34 | 2.5  | Transcribed locus, weakly similar to NP_001043332.1 [Oryza sativa (japonica cultivar-group)]              |
| Les.1061.1.A1_at      | AI488184   | TC23906 | 113  | 138  | 282  | 1.22 | 2.5  | Transcribed locus, weakly similar to NP_568700.1 protein [Arabidopsis thaliana]                           |
| LesAffx.33082.1.S1_at | BG133383   | TC23204 | 50   | 65   | 123  | 1.3  | 2.47 | ---                                                                                                       |
| LesAffx.14450.1.S1_at | AW649659   | AW64965 | 188  | 167  | 463  | 0.89 | 2.46 | ---                                                                                                       |
| LesAffx.23119.1.S1_at | BG127117   | TC23852 | 105  | 143  | 259  | 1.35 | 2.46 | Transcribed locus, weakly similar to NP_001064365.1 [Oryza sativa (japonica cultivar-group)]              |
| LesAffx.15353.1.S1_at | BM967389   | BM96738 | 44   | 62   | 107  | 1.42 | 2.45 | Transcribed locus, weakly similar to NP_001046337.1 [Oryza sativa (japonica cultivar-group)]              |
| Les.2850.1.S1_at      | CN384785   | TC23958 | 90   | 160  | 220  | 1.78 | 2.45 | CDNA, clone: FC09CF05, HTC in fruit                                                                       |
| LesAffx.62906.1.S1_at | BI923447   | TC23590 | 66   | 104  | 162  | 1.57 | 2.45 | Transcribed locus, weakly similar to NP_065266.1 translocase [Mus musculus]                               |
| LesAffx.68054.1.S1_at | AI898501   | TC22471 | 233  | 331  | 569  | 1.42 | 2.44 | Transcribed locus, weakly similar to NP_001049859.1 [Oryza sativa (japonica cultivar-group)]              |
| Les.3747.1.S1_at      | Z46675.1   | NP00034 | 35   | 29   | 84   | 0.84 | 2.43 | extensin                                                                                                  |
| LesAffx.3455.2.S1_at  | CN385030   | TC23177 | 164  | 318  | 398  | 1.94 | 2.43 | Transcribed locus, weakly similar to NP_001042297.1 [Oryza sativa (japonica cultivar-group)]              |
| Les.1787.1.A1_at      | BG628780   | TC23942 | 430  | 630  | 1043 | 1.47 | 2.43 | Transcribed locus, weakly similar to NP_001055064.1 [Oryza sativa (japonica cultivar-group)]              |
| Les.2832.1.S1_at      | CN384480   | TC21748 | 3400 | 2219 | 8155 | 0.65 | 2.4  | peroxidase                                                                                                |
| Les.4326.1.S1_at      | AY235681.1 | TC22243 | 160  | 307  | 382  | 1.91 | 2.38 | P58IPK                                                                                                    |
| Les.3591.1.S1_at      | CN385613   | FS19591 | 494  | 670  | 1162 | 1.36 | 2.35 | Partial mRNA (clone SENU1)                                                                                |
| LesAffx.3455.1.S1_at  | BI421254   | TC23177 | 82   | 137  | 191  | 1.68 | 2.34 | Transcribed locus, weakly similar to NP_001042297.1 [Oryza sativa (japonica cultivar-group)]              |
| LesAffx.6103.1.S1_at  | AW647641   | TC22739 | 62   | 65   | 144  | 1.05 | 2.33 | Transcribed locus, weakly similar to NP_001042342.1 [Oryza sativa (japonica cultivar-group)]              |
| LesAffx.49809.1.S1_at | CN384734   | TC21755 | 217  | 375  | 506  | 1.73 | 2.33 | Transcribed locus, weakly similar to NP_001045544.1 [Oryza sativa (japonica cultivar-group)]              |
| Les.4966.1.S1_at      | BT013015.1 | BF17648 | 111  | 105  | 257  | 0.95 | 2.33 | Lycopersicon esculentum clone 114253R, mRNA sequence                                                      |
| LesAffx.66953.1.S1_at | AW651552   | TC23604 | 3457 | 5670 | 8050 | 1.64 | 2.33 | Transcribed locus, weakly similar to NP_001042903.1 [Oryza sativa (japonica cultivar-group)]              |
| Les.2565.3.S1_at      | BI204284   | TC23474 | 1720 | 3003 | 3999 | 1.75 | 2.32 | Transcribed locus, weakly similar to XP_001087898.1 stromal cell-derived factor 2-like 1 [Macaca mulatta] |
| Les.3706.1.A1_at      | AF022014.1 | TC21953 | 136  | 147  | 314  | 1.09 | 2.31 | IAA3 protein                                                                                              |

|                       |            |         |      |      |      |      |      |                                                                                                                                              |
|-----------------------|------------|---------|------|------|------|------|------|----------------------------------------------------------------------------------------------------------------------------------------------|
| LesAffx.49103.1.A1_at | AW224716   | TC22913 | 766  | 1273 | 1772 | 1.66 | 2.31 | Transcribed locus, weakly similar to NP_065615.1 acid (GABA(A)) receptor-associated protein-like 1 [Mus musculus]                            |
| LesAffx.61012.1.S1_at | BF050668   | TC23271 | 194  | 358  | 448  | 1.85 | 2.31 | Transcribed locus, weakly similar to NP_001042750.1 [Oryza sativa (japonica cultivar-group)]                                                 |
| Les.3623.1.S1_at      | L12051.1   | TC22145 | 888  | 1387 | 2048 | 1.56 | 2.31 | GTPase                                                                                                                                       |
| Les.2127.1.A1_at      | BG631801   | TC22627 | 179  | 282  | 412  | 1.58 | 2.3  | Transcribed locus, weakly similar to NP_566133.1 protein [Arabidopsis thaliana]                                                              |
| LesAffx.62690.2.A1_at | CD003021   | CD00302 | 210  | 392  | 483  | 1.87 | 2.3  | Transcribed locus, weakly similar to NP_001043439.1 [Oryza sativa (japonica cultivar-group)]                                                 |
| Les.2938.3.A1_at      | BG631240   | TC21894 | 2639 | 5208 | 6069 | 1.97 | 2.3  | Transcribed locus, weakly similar to NP_001063569.1 [Oryza sativa (japonica cultivar-group)]                                                 |
| Les.3408.1.S2_at      | Y08804.1   | TC21800 | 19   | 21   | 43   | 1.1  | 2.29 | PR protein                                                                                                                                   |
| Les.815.1.A1_at       | BG627610   | BG62761 | 55   | 99   | 125  | 1.81 | 2.29 | Transcribed locus                                                                                                                            |
| LesAffx.61510.2.S1_at | BE433504   | TC23546 | 264  | 448  | 604  | 1.7  | 2.29 | Transcribed locus, weakly similar to NP_001058639.1 [Oryza sativa (japonica cultivar-group)]                                                 |
| LesAffx.64333.1.S1_at | CN384866   | TC21750 | 2543 | 1844 | 5802 | 0.72 | 2.28 | Transcribed locus, weakly similar to NP_565383.1 protein [Arabidopsis thaliana]                                                              |
| LesAffx.15850.2.A1_at | CK715684   | TC23653 | 651  | 1130 | 1477 | 1.74 | 2.27 | Transcribed locus, weakly similar to NP_001046323.1 [Oryza sativa (japonica cultivar-group)]                                                 |
| Les.1967.1.A1_at      | BG630553   | TC23879 | 64   | 58   | 146  | 0.9  | 2.27 | Transcribed locus, weakly similar to NP_193738.1 (QUARTET 3) [Arabidopsis thaliana]                                                          |
| LesAffx.2226.2.A1_at  | CK716250   | TC23401 | 526  | 1027 | 1187 | 1.95 | 2.25 | Transcribed locus, moderately similar to XP_001100144.1 similar to ribonucleotide reductase M2 B (TP53 inducible) isoform 3 [Macaca mulatta] |
| Les.2214.1.A1_at      | BG735119   | TC23773 | 287  | 516  | 646  | 1.8  | 2.25 | Transcribed locus, moderately similar to NP_001067050.1 [Oryza sativa (japonica cultivar-group)]                                             |
| Les.5939.1.S1_at      | CN385618   | TC23300 | 420  | 682  | 945  | 1.62 | 2.25 | Transcribed locus, moderately similar to NP_001044456.1 [Oryza sativa (japonica cultivar-group)]                                             |
| LesAffx.60369.1.S1_at | BG130091   | TC22835 | 863  | 1185 | 1929 | 1.37 | 2.24 | Transcribed locus, moderately similar to NP_001064827.1 [Oryza sativa (japonica cultivar-group)]                                             |
| LesAffx.47467.1.S1_at | AI896278   | TC22724 | 37   | 39   | 83   | 1.05 | 2.23 | Transcribed locus, weakly similar to NP_001045094.1 [Oryza sativa (japonica cultivar-group)]                                                 |
| LesAffx.56868.1.S1_at | AW030921   | TC21948 | 74   | 131  | 165  | 1.77 | 2.23 | Transcribed locus, weakly similar to NP_001045103.1 [Oryza sativa (japonica cultivar-group)]                                                 |
| Les.150.1.S1_at       | BT013117.1 | AW65015 | 431  | 676  | 957  | 1.57 | 2.22 | Lycopersicon esculentum clone 114407R, mRNA sequence                                                                                         |
| Les.4096.1.S1_at      | AW220281   | TC22846 | 298  | 473  | 660  | 1.59 | 2.22 | Transcribed locus, weakly similar to NP_001062356.1 [Oryza sativa (japonica cultivar-group)]                                                 |
| Les.2458.1.S1_at      | BG713780   | TC24476 | 23   | 36   | 51   | 1.57 | 2.21 | Transcribed locus                                                                                                                            |
| Les.4040.1.A1_at      | X83420.1   | AW09681 | 510  | 933  | 1128 | 1.83 | 2.21 | Alu I-fragment                                                                                                                               |

|                       |          |         |      |       |       |      |      |                                                                                                                                                                |
|-----------------------|----------|---------|------|-------|-------|------|------|----------------------------------------------------------------------------------------------------------------------------------------------------------------|
| Les.1013.1.A1_at      | BG628758 | TC22465 | 132  | 215   | 291   | 1.63 | 2.21 | Transcribed locus                                                                                                                                              |
| LesAffx.62121.1.S1_at | AW220705 | TC24448 | 679  | 1055  | 1494  | 1.55 | 2.2  | Transcribed locus, weakly similar to NP_001039191.1 protein containing an Inosine-uridine preferring nucleoside hydrolase domain [ <i>Xenopus tropicalis</i> ] |
| Les.1431.1.A1_at      | BG631562 | TC23902 | 817  | 1560  | 1790  | 1.91 | 2.19 | Transcribed locus, moderately similar to NP_001043710.1 [ <i>Oryza sativa</i> (japonica cultivar-group)]                                                       |
| LesAffx.44382.1.S1_at | BI921407 | GO37430 | 106  | 130   | 232   | 1.23 | 2.19 | Transcribed locus, weakly similar to NP_001041735.1 [ <i>Oryza sativa</i> (japonica cultivar-group)]                                                           |
| LesAffx.60369.2.S1_at | AI782767 | TC23268 | 939  | 1277  | 2046  | 1.36 | 2.18 | Transcribed locus, moderately similar to NP_001064827.1 [ <i>Oryza sativa</i> (japonica cultivar-group)]                                                       |
| Les.5881.1.A1_at      | CK716328 | TC24065 | 108  | 150   | 234   | 1.39 | 2.18 | Transcribed locus                                                                                                                                              |
| Les.2565.2.S1_at      | BE462384 | TC23474 | 1185 | 1923  | 2574  | 1.62 | 2.17 | Transcribed locus, weakly similar to XP_001087898.1 stromal cell-derived factor 2-like 1 [ <i>Macaca mulatta</i> ]                                             |
| LesAffx.837.1.S1_at   | AJ831935 | TC22608 | 195  | 359   | 423   | 1.84 | 2.17 | Transcribed locus, weakly similar to NP_001055192.1 [ <i>Oryza sativa</i> (japonica cultivar-group)]                                                           |
| Les.4254.1.S1_at      | BG631257 | TC24002 | 2077 | 2639  | 4494  | 1.27 | 2.16 | Transcribed locus, moderately similar to NP_001061342.1 [ <i>Oryza sativa</i> (japonica cultivar-group)]                                                       |
| Les.122.1.S1_at       | Z15141.1 | TC22826 | 5843 | 11597 | 12612 | 1.98 | 2.16 | chitinase                                                                                                                                                      |
| Les.1444.1.S1_at      | AI777910 | TC22510 | 1011 | 1888  | 2180  | 1.87 | 2.16 | Transcribed locus, weakly similar to XP_001108613.1 similar to 60S acidic ribosomal protein P1 isoform 2 [ <i>Macaca mulatta</i> ]                             |
| LesAffx.17773.1.S1_at | BF113622 | DB69166 | 1065 | 1204  | 2293  | 1.13 | 2.15 | Transcribed locus, weakly similar to NP_001045544.1 [ <i>Oryza sativa</i> (japonica cultivar-group)]                                                           |
| LesAffx.59536.1.S1_at | BI210459 | TC22441 | 2687 | 4260  | 5749  | 1.59 | 2.14 | Transcribed locus, weakly similar to NP_001047018.1 [ <i>Oryza sativa</i> (japonica cultivar-group)]                                                           |
| LesAffx.59777.1.S1_at | AI780774 | TC22665 | 3096 | 5898  | 6622  | 1.91 | 2.14 | Transcribed locus                                                                                                                                              |
| LesAffx.67725.1.S1_at | BF097383 | BF09738 | 49   | 87    | 105   | 1.75 | 2.13 | ---                                                                                                                                                            |
| LesAffx.56.15.A1_at   | CK715686 | TC22818 | 1568 | 2829  | 3318  | 1.8  | 2.12 | Transcribed locus, weakly similar to NP_001060451.1 [ <i>Oryza sativa</i> (japonica cultivar-group)]                                                           |
| Les.300.1.S1_at       | BF097631 | TC22421 | 508  | 563   | 1074  | 1.11 | 2.12 | Transcribed locus, weakly similar to NP_001042001.1 [ <i>Oryza sativa</i> (japonica cultivar-group)]                                                           |
| LesAffx.52960.1.S1_at | BI207845 | TC23617 | 320  | 515   | 676   | 1.61 | 2.11 | ---                                                                                                                                                            |
| Les.527.1.A1_at       | BG626073 | TC22131 | 167  | 299   | 351   | 1.8  | 2.11 | Transcribed locus, weakly similar to XP_001106667.1 similar to ADP-ribosylation factor-like 10B [ <i>Macaca mulatta</i> ]                                      |
| Les.4465.1.S1_x_at    | L24068.1 | TC24359 | 3    | 5     | 6     | 1.64 | 2.11 | <i>Lycopersicon esculentum</i> (DB266) meloidogyne-induced giant cell protein mRNA, 3' end                                                                     |
| LesAffx.35954.1.S1_at | AW092295 | AW09229 | 220  | 305   | 464   | 1.38 | 2.1  | ---                                                                                                                                                            |

|                       |            |         |      |      |      |      |      |                                                                                                                   |
|-----------------------|------------|---------|------|------|------|------|------|-------------------------------------------------------------------------------------------------------------------|
| Les.2513.1.S1_at      | BI205120   | TC22383 | 524  | 673  | 1100 | 1.29 | 2.1  | Transcribed locus, weakly similar to NP_065615.1 acid (GABA(A)) receptor-associated protein-like 1 [Mus musculus] |
| LesAffx.31073.1.A1_at | AY125865   | AY12586 | 10   | 14   | 22   | 1.34 | 2.1  | ---                                                                                                               |
| LesAffx.65156.1.A1_at | CD003450   | TC23971 | 20   | 37   | 42   | 1.81 | 2.1  | Transcribed locus                                                                                                 |
| Les.170.1.S1_at       | AY026344.1 | TC22471 | 258  | 314  | 542  | 1.21 | 2.1  | non-symbiotic hemoglobin class 2                                                                                  |
| LesAffx.47666.1.S1_at | BE458190   | TC22130 | 698  | 1141 | 1455 | 1.63 | 2.08 | Transcribed locus, moderately similar to NP_001058156.1 [Oryza sativa (japonica cultivar-group)]                  |
| Les.3707.1.A1_at      | AF022013.1 | TC24298 | 32   | 24   | 66   | 0.76 | 2.08 | IAA2 protein                                                                                                      |
| Les.827.1.S1_at       | BG626882   | TC23903 | 1785 | 2041 | 3700 | 1.14 | 2.07 | TBG6 protein                                                                                                      |
| LesAffx.55662.1.S1_at | AW625299   | TC24518 | 216  | 429  | 447  | 1.98 | 2.07 | ---                                                                                                               |
| Les.1243.1.A1_at      | BG630316   | TC23603 | 647  | 1260 | 1334 | 1.95 | 2.06 | Transcribed locus                                                                                                 |
| Les.3732.1.S1_at      | AF308936.1 | NP28032 | 85   | 63   | 176  | 0.74 | 2.06 | endo-beta-1,4-D-glucanase                                                                                         |
| Les.3539.1.S1_at      | AF203481.1 | TC21733 | 425  | 676  | 874  | 1.59 | 2.06 | phosphoenolpyruvate carboxylase kinase                                                                            |
| LesAffx.71544.1.S1_at | BI422043   | TC21855 | 151  | 277  | 309  | 1.84 | 2.06 | Transcribed locus, weakly similar to NP_001045150.1 [Oryza sativa (japonica cultivar-group)]                      |
| Les.3086.2.S1_at      | CN385936   | TC22850 | 3681 | 6955 | 7543 | 1.89 | 2.05 | Phospholipase PLDa3                                                                                               |
| Les.2949.1.S1_at      | AJ515747.1 | TC21956 | 391  | 441  | 798  | 1.13 | 2.04 | proliferating cell nuclear antigen                                                                                |
| LesAffx.15850.2.S1_at | CK715684   | TC23653 | 495  | 899  | 1007 | 1.82 | 2.03 | Transcribed locus, weakly similar to NP_001046323.1 [Oryza sativa (japonica cultivar-group)]                      |
| Les.2631.2.S1_at      | BI208990   | TC23151 | 1144 | 1804 | 2324 | 1.58 | 2.03 | CDNA, clone: FC04CC10, HTC in fruit                                                                               |
| Les.5927.1.S1_at      | CK715580   | TC21943 | 452  | 884  | 918  | 1.95 | 2.03 | CDNA, clone: FC22CB04, HTC in fruit                                                                               |
| Les.2494.2.A1_at      | BG626810   | TC22933 | 2141 | 3599 | 4343 | 1.68 | 2.03 | Transcribed locus, moderately similar to NP_001057280.1 [Oryza sativa (japonica cultivar-group)]                  |
| LesAffx.67017.1.S1_at | AW032581   | TC22724 | 40   | 63   | 81   | 1.57 | 2.03 | Transcribed locus, moderately similar to NP_001046101.1 [Oryza sativa (japonica cultivar-group)]                  |
| Les.5523.1.S1_at      | BT014071.1 | TC21750 | 875  | 1513 | 1768 | 1.73 | 2.02 | Lycopersicon esculentum clone 133171F, mRNA sequence                                                              |
| LesAffx.31514.1.S1_at | BG127453   | TC22656 | 1036 | 1547 | 2093 | 1.49 | 2.02 | Transcribed locus, weakly similar to NP_001041856.1 [Oryza sativa (japonica cultivar-group)]                      |
| LesAffx.15986.1.S1_at | CK715617   | TC23538 | 47   | 68   | 94   | 1.44 | 2.01 | Transcribed locus, weakly similar to XP_001116334.1 myo-inositol oxygenase [Macaca mulatta]                       |
| LesAffx.60171.1.S1_at | BG134335   | TC22657 | 548  | 859  | 1101 | 1.57 | 2.01 | Transcribed locus, moderately similar to NP_001056054.1 [Oryza sativa (japonica cultivar-group)]                  |
| Les.2565.1.S1_at      | AW441199   | TC23474 | 2409 | 3801 | 4837 | 1.58 | 2.01 | Transcribed locus, weakly similar to XP_001087898.1 stromal cell-derived factor 2-like 1 [Macaca mulatta]         |
| Les.878.1.A1_at       | BG627846   | BG62784 | 5    | 4    | 9    | 0.96 | 2    | Transcribed locus                                                                                                 |

|                       |            |         |      |      |      |      |     |                                                                                                                        |
|-----------------------|------------|---------|------|------|------|------|-----|------------------------------------------------------------------------------------------------------------------------|
| Les.5804.1.S1_at      | BT014601.1 | TC22840 | 1996 | 3196 | 3989 | 1.6  | 2   | CDNA, clone: FC20CF12, HTC in fruit /// Lycopersicon esculentum clone 134079R, mRNA sequence                           |
| Les.2494.1.S1_at      | AJ785249   | BI20405 | 1939 | 2991 | 3873 | 1.54 | 2   | Transcribed locus, moderately similar to NP_001057280.1 [Oryza sativa (japonica cultivar-group)]                       |
| LesAffx.29757.2.S1_at | AI898522   | TC23303 | 2141 | 3656 | 4277 | 1.71 | 2   | Transcribed locus, moderately similar to NP_001062087.1 [Oryza sativa (japonica cultivar-group)]                       |
| Les.4920.1.S1_at      | BT012902.1 | TC23329 | 1485 | 2675 | 2964 | 1.8  | 2   | Lycopersicon esculentum clone 114011F, mRNA sequence                                                                   |
| LesAffx.35173.1.S1_at | AW625495   | TC23403 | 459  | 876  | 916  | 1.91 | 2   | ---                                                                                                                    |
| Les.388.2.S1_at       | BG130490   | TC23958 | 1011 | 580  | 510  | 0.57 | 0.5 | Transcribed locus, weakly similar to NP_001044141.1 [Oryza sativa (japonica cultivar-group)]                           |
| LesAffx.13481.1.S1_at | BG134320   | TC22621 | 1613 | 2031 | 814  | 1.26 | 0.5 | Transcribed locus, weakly similar to NP_001044052.1 [Oryza sativa (japonica cultivar-group)]                           |
| Les.1234.1.A1_at      | BG630249   | BG63024 | 1065 | 810  | 537  | 0.76 | 0.5 | Transcribed locus, weakly similar to NP_199933.2 protein [Arabidopsis thaliana]                                        |
| LesAffx.58849.1.S1_at | BG123587   | TC21996 | 378  | 240  | 191  | 0.63 | 0.5 | Transcribed locus, weakly similar to NP_001043235.1 [Oryza sativa (japonica cultivar-group)]                           |
| LesAffx.3394.1.S1_at  | BT013543.1 | TC23598 | 1737 | 1195 | 875  | 0.69 | 0.5 | ---                                                                                                                    |
| Les.631.2.S1_at       | BF113057   | TC23074 | 418  | 263  | 210  | 0.63 | 0.5 | Transcribed locus, weakly similar to NP_001044672.1 [Oryza sativa (japonica cultivar-group)]                           |
| LesAffx.56.5.A1_a_at  | BI205937   | TC23902 | 2551 | 2181 | 1281 | 0.85 | 0.5 | Transcribed locus, weakly similar to NP_004311.1 Ca <sup>++</sup> transporting, fast twitch 1 isoform b [Homo sapiens] |
| LesAffx.37344.1.S1_at | AI897449   | TC21881 | 185  | 150  | 93   | 0.81 | 0.5 | Transcribed locus, weakly similar to NP_001042390.1 [Oryza sativa (japonica cultivar-group)]                           |
| Les.4791.1.S1_at      | AI775838   | TC23701 | 327  | 172  | 164  | 0.53 | 0.5 | Transcribed locus, weakly similar to NP_001055100.1 [Oryza sativa (japonica cultivar-group)]                           |
| Les.5192.1.S1_at      | BT013479.1 | TC22963 | 180  | 105  | 90   | 0.58 | 0.5 | Lycopersicon esculentum clone 132157F, mRNA sequence                                                                   |
| LesAffx.64445.1.S1_at | BE450262   | TC23904 | 1803 | 1069 | 902  | 0.59 | 0.5 | Transcribed locus, weakly similar to NP_001049227.1 [Oryza sativa (japonica cultivar-group)]                           |
| Les.5370.1.S1_at      | BT013789.1 | BP90464 | 444  | 276  | 222  | 0.62 | 0.5 | Lycopersicon esculentum clone 132683R, mRNA sequence                                                                   |
| LesAffx.59231.1.S1_at | BM535046   | BM53504 | 264  | 214  | 132  | 0.81 | 0.5 | Transcribed locus, moderately similar to NP_001049763.1 [Oryza sativa (japonica cultivar-group)]                       |
| Les.2286.1.S1_at      | BT013195.1 | TC22726 | 856  | 518  | 428  | 0.61 | 0.5 | Lycopersicon esculentum clone 134347F, mRNA sequence                                                                   |
| Les.3273.1.S1_at      | BG627786   | TC24518 | 2274 | 1796 | 1136 | 0.79 | 0.5 | proline rich protein                                                                                                   |
| Les.2722.2.S1_at      | BI210554   | TC23496 | 1050 | 653  | 524  | 0.62 | 0.5 | Transcribed locus, weakly similar to NP_001046415.1 [Oryza sativa (japonica cultivar-group)]                           |
| LesAffx.10497.2.S1_at | AI897776   | TC24435 | 414  | 302  | 206  | 0.73 | 0.5 | Transcribed locus, weakly similar to NP_001042618.1 [Oryza sativa (japonica cultivar-group)]                           |

|                       |            |         |      |      |      |      |      |                                                                                                                                            |
|-----------------------|------------|---------|------|------|------|------|------|--------------------------------------------------------------------------------------------------------------------------------------------|
| Les.1936.1.S1_at      | BG626997   | TC21753 | 797  | 1263 | 397  | 1.59 | 0.5  | Lycopersicon esculentum clone 133556R, mRNA sequence                                                                                       |
| LesAffx.37438.1.A1_at | AI487130   | TC23751 | 171  | 140  | 85   | 0.82 | 0.5  | Transcribed locus, weakly similar to NP_001066441.1 [Oryza sativa (japonica cultivar-group)]                                               |
| LesAffx.17157.1.S1_at | CK715404   | CK71540 | 206  | 145  | 102  | 0.7  | 0.5  | ---                                                                                                                                        |
| LesAffx.43670.1.S1_at | AW040873   | TC22844 | 758  | 384  | 376  | 0.51 | 0.5  | Transcribed locus, moderately similar to NP_001052293.1 [Oryza sativa (japonica cultivar-group)]                                           |
| LesAffx.57251.1.S1_at | BI208760   | TC22155 | 37   | 27   | 19   | 0.73 | 0.5  | Transcribed locus, weakly similar to NP_001043814.1 [Oryza sativa (japonica cultivar-group)]                                               |
| Les.1331.1.A1_at      | BG630887   | TC24042 | 95   | 65   | 47   | 0.69 | 0.5  | Transcribed locus                                                                                                                          |
| Les.224.1.S1_at       | AJ277561.1 | TC21885 | 1162 | 766  | 574  | 0.66 | 0.49 | gts1 protein                                                                                                                               |
| Les.3242.1.A1_at      | BG627693   | TC22682 | 75   | 50   | 37   | 0.67 | 0.49 | Transcribed locus, weakly similar to XP_001114034.1 similar to Glyceraldehyde-3-phosphate dehydrogenase (GAPDH) isoform 1 [Macaca mulatta] |
| Les.2722.1.S1_at      | AI899162   | TC23496 | 1135 | 694  | 559  | 0.61 | 0.49 | Transcribed locus, weakly similar to NP_001046415.1 [Oryza sativa (japonica cultivar-group)]                                               |
| LesAffx.24121.2.A1_at | BI211077   | TC23027 | 481  | 324  | 236  | 0.67 | 0.49 | Transcribed locus, weakly similar to NP_001061808.1 [Oryza sativa (japonica cultivar-group)]                                               |
| Les.2459.2.S1_at      | AW945045   | TC22764 | 2482 | 1627 | 1215 | 0.66 | 0.49 | Transcribed locus, weakly similar to NP_036081.1 activated protein kinase 14 [Mus musculus]                                                |
| Les.482.1.S1_at       | BG630028   | TC22380 | 2928 | 1680 | 1432 | 0.57 | 0.49 | photosystem II 23 kDa protein                                                                                                              |
| Les.5696.1.S1_at      | BT014400.1 | TC23901 | 1491 | 922  | 728  | 0.62 | 0.49 | Lycopersicon esculentum clone 133705F, mRNA sequence                                                                                       |
| LesAffx.16710.2.A1_at | AI899221   | TC23788 | 327  | 293  | 159  | 0.9  | 0.49 | Transcribed locus, weakly similar to XP_001097418.1 aquaporin 4 isoform 5 [Macaca mulatta]                                                 |
| Les.4028.1.A1_at      | BE354143   | TC24194 | 39   | 37   | 19   | 0.94 | 0.49 | Lycopersicon esculentum (DB#101) meloidogyne-induced giant cell protein mRNA, 3' end                                                       |
| Les.1989.1.A1_at      | BG630761   | TC24215 | 1974 | 1211 | 960  | 0.61 | 0.49 | Transcribed locus                                                                                                                          |
| LesAffx.66014.1.S1_at | BI926363   | TC24281 | 615  | 365  | 299  | 0.59 | 0.49 | Transcribed locus, moderately similar to NP_001066466.1 [Oryza sativa (japonica cultivar-group)]                                           |
| Les.3522.1.S1_at      | AF071786.3 | TC21714 | 4483 | 3476 | 2179 | 0.78 | 0.49 | sucrose-phosphate synthase                                                                                                                 |
| LesAffx.60153.1.S1_at | BI423436   | BG13472 | 179  | 140  | 87   | 0.78 | 0.49 | Transcribed locus, moderately similar to NP_001064880.1 [Oryza sativa (japonica cultivar-group)]                                           |
| Les.4300.2.S1_at      | AW217635   | TC21888 | 8333 | 4266 | 4048 | 0.51 | 0.49 | Transcribed locus, weakly similar to NP_001043243.1 [Oryza sativa (japonica cultivar-group)]                                               |
| LesAffx.56.14.S1_at   | AJ784593   | AW62621 | 193  | 107  | 94   | 0.55 | 0.49 | Transcribed locus, weakly similar to NP_001047056.1 [Oryza sativa (japonica cultivar-group)]                                               |
| Les.4362.1.A1_at      | AY306154.1 | TC22524 | 2529 | 1433 | 1224 | 0.57 | 0.48 | euAP1 APETALA1-like MADS-box                                                                                                               |

|                       |            |         |      |      |      |      |      |                                                                                                        |
|-----------------------|------------|---------|------|------|------|------|------|--------------------------------------------------------------------------------------------------------|
| LesAffx.61165.1.S1_at | BM409862   | TC22968 | 990  | 660  | 478  | 0.67 | 0.48 | Transcribed locus, weakly similar to NP_001041945.1 [Oryza sativa (japonica cultivar-group)]           |
| LesAffx.52470.1.S1_at | BM412030   | TC23981 | 1673 | 888  | 806  | 0.53 | 0.48 | Transcribed locus, weakly similar to NP_001045184.1 [Oryza sativa (japonica cultivar-group)]           |
| Les.3234.1.A1_at      | BG735047   | TC23423 | 2298 | 2199 | 1107 | 0.96 | 0.48 | Metalloprotease inhibitor                                                                              |
| LesAffx.64540.1.S1_at | AW441832   | TC22052 | 794  | 808  | 382  | 1.02 | 0.48 | Transcribed locus, moderately similar to NP_001053805.1 [Oryza sativa (japonica cultivar-group)]       |
| LesAffx.48314.2.A1_at | AI486366   | TC21917 | 243  | 196  | 117  | 0.81 | 0.48 | Transcribed locus, weakly similar to XP_001161712.1 ring finger protein 10 isoform 7 [Pan troglodytes] |
| LesAffx.69867.1.S1_at | BE450245   | TC22913 | 848  | 591  | 408  | 0.7  | 0.48 | Transcribed locus, weakly similar to NP_001043594.1 [Oryza sativa (japonica cultivar-group)]           |
| LesAffx.6294.1.S1_at  | BI210923   | TC22443 | 1666 | 1468 | 797  | 0.88 | 0.48 | Transcribed locus, weakly similar to NP_190908.1 protein [Arabidopsis thaliana]                        |
| LesAffx.69867.3.S1_at | AW035583   | TC22913 | 992  | 708  | 475  | 0.71 | 0.48 | Transcribed locus, weakly similar to NP_001043594.1 [Oryza sativa (japonica cultivar-group)]           |
| Les.3261.1.A1_at      | BG627816   | TC23483 | 1362 | 710  | 651  | 0.52 | 0.48 | Transcribed locus, moderately similar to NP_001050426.1 [Oryza sativa (japonica cultivar-group)]       |
| Les.1724.1.S1_at      | AI780669   | TC22140 | 2412 | 2691 | 1153 | 1.12 | 0.48 | Transcribed locus, weakly similar to NP_001049750.1 [Oryza sativa (japonica cultivar-group)]           |
| LesAffx.17157.1.A1_at | CK715404   | CK71540 | 156  | 105  | 75   | 0.67 | 0.48 | ---                                                                                                    |
| Les.4039.1.A1_at      | AF004881.1 | NP00056 | 234  | 163  | 112  | 0.69 | 0.48 | Lycopersicon esculentum resistance complex protein I2C-4 (I2C-4) possible pseudo mRNA sequence         |
| Les.2608.1.S1_at      | BT014160.1 | TC23356 | 1160 | 767  | 551  | 0.66 | 0.48 | Lycopersicon esculentum clone 133280F, mRNA sequence                                                   |
| LesAffx.46734.1.S1_at | AI485163   | AI48516 | 329  | 218  | 156  | 0.66 | 0.47 | Transcribed locus, weakly similar to NP_001045017.1 [Oryza sativa (japonica cultivar-group)]           |
| LesAffx.27440.1.S1_at | BM410131   | TC23837 | 663  | 346  | 315  | 0.52 | 0.47 | Transcribed locus, weakly similar to NP_001055851.1 [Oryza sativa (japonica cultivar-group)]           |
| LesAffx.9367.1.S1_at  | CN385420   | TC22317 | 448  | 398  | 212  | 0.89 | 0.47 | Transcribed locus, weakly similar to NP_001049918.1 [Oryza sativa (japonica cultivar-group)]           |
| Les.4099.1.S1_at      | AY187634.1 | TC21751 | 741  | 574  | 351  | 0.77 | 0.47 | phosphoenolpyruvate carboxylase kinase 2                                                               |
| LesAffx.38145.1.A1_at | AI487713   | BM40940 | 459  | 370  | 217  | 0.81 | 0.47 | Transcribed locus, weakly similar to NP_001050432.1 [Oryza sativa (japonica cultivar-group)]           |
| Les.3038.1.S1_at      | AW094037   | TC22677 | 1638 | 1037 | 775  | 0.63 | 0.47 | Transcribed locus, weakly similar to NP_001059599.1 [Oryza sativa (japonica cultivar-group)]           |
| Les.2605.1.A1_at      | BG631278   | TC23103 | 1129 | 651  | 534  | 0.58 | 0.47 | Transcribed locus, weakly similar to NP_001042131.1 [Oryza sativa (japonica cultivar-group)]           |

|                       |            |         |      |      |      |      |      |                                                                                                  |
|-----------------------|------------|---------|------|------|------|------|------|--------------------------------------------------------------------------------------------------|
| Les.232.1.S1_at       | AW649825   | TC23518 | 715  | 533  | 338  | 0.75 | 0.47 | Transcribed locus, weakly similar to NP_001048301.1 [Oryza sativa (japonica cultivar-group)]     |
| Les.5576.1.A1_at      | BT014182.1 | TC23559 | 722  | 512  | 341  | 0.71 | 0.47 | Lycopersicon esculentum clone 133347F, mRNA sequence                                             |
| Les.3436.2.S1_a_at    | CN385216   | TC22872 | 3174 | 3739 | 1499 | 1.18 | 0.47 | Transcribed locus                                                                                |
| Les.5629.1.S1_at      | BT014283.1 | TC24074 | 3103 | 3350 | 1463 | 1.08 | 0.47 | Lycopersicon esculentum clone 133517F, mRNA sequence                                             |
| Les.2174.1.S1_at      | CN384833   | TC22746 | 110  | 64   | 52   | 0.58 | 0.47 | Transcribed locus                                                                                |
| LesAffx.66847.1.S1_at | AI778064   | AI77806 | 95   | 79   | 44   | 0.83 | 0.47 | ---                                                                                              |
| LesAffx.52453.1.S1_at | BG135842   | BI92407 | 573  | 303  | 269  | 0.53 | 0.47 | Transcribed locus                                                                                |
| Les.1514.1.S1_at      | BG626292   | TC23484 | 846  | 595  | 396  | 0.7  | 0.47 | Lycopersicon esculentum clone 133815F, mRNA sequence                                             |
| Les.840.1.A1_at       | BG629718   | TC24411 | 352  | 426  | 165  | 1.21 | 0.47 | Transcribed locus                                                                                |
| Les.4492.2.S1_at      | CK714954   | TC22356 | 2845 | 1666 | 1332 | 0.59 | 0.47 | Transcribed locus, weakly similar to XP_001111095.1 aldolase B isoform 5 [Macaca mulatta]        |
| Les.1379.1.A1_at      | BG631211   | TC21753 | 544  | 394  | 254  | 0.72 | 0.47 | Transcribed locus                                                                                |
| LesAffx.9260.1.S1_at  | AI781857   | DB68638 | 221  | 116  | 103  | 0.52 | 0.47 | Transcribed locus, moderately similar to NP_001048773.1 [Oryza sativa (japonica cultivar-group)] |
| Les.3564.1.A1_at      | X55684.1   | TC24079 | 656  | 425  | 306  | 0.65 | 0.47 | extensin (class I)                                                                               |
| Les.4542.1.A1_at      | BT014515.1 | DB71533 | 346  | 213  | 161  | 0.61 | 0.47 | Lycopersicon esculentum clone 133903R, mRNA sequence                                             |
| LesAffx.70590.1.S1_at | AI775408   | TC22762 | 131  | 109  | 61   | 0.84 | 0.47 | Transcribed locus, moderately similar to NP_001044465.1 [Oryza sativa (japonica cultivar-group)] |
| Les.3072.1.S1_at      | BG627918   | TC23388 | 669  | 388  | 312  | 0.58 | 0.47 | MRNA binding protein precursor                                                                   |
| LesAffx.29801.1.S1_at | AI489456   | TC23187 | 4669 | 5239 | 2174 | 1.12 | 0.47 | Transcribed locus, weakly similar to NP_001042186.1 [Oryza sativa (japonica cultivar-group)]     |
| Les.3958.1.A1_at      | AF385366.1 | TC23696 | 244  | 124  | 113  | 0.51 | 0.46 | violaxanthin de-epoxidase                                                                        |
| Les.3671.1.S1_at      | M60166.1   | TC23533 | 3646 | 1922 | 1690 | 0.53 | 0.46 | H <sup>+</sup> -ATPase                                                                           |
| Les.5350.1.A1_at      | BT013752.1 | TC22353 | 230  | 122  | 106  | 0.53 | 0.46 | Lycopersicon esculentum clone 132615R, mRNA sequence                                             |
| Les.2703.1.S1_at      | BG735318   | TC23293 | 2028 | 1076 | 939  | 0.53 | 0.46 | Lycopersicon esculentum clone 132109R, mRNA sequence                                             |
| LesAffx.12150.1.A1_at | BG643920   | TC24476 | 238  | 275  | 110  | 1.15 | 0.46 | ---                                                                                              |
| Les.5780.1.A1_at      | BT014552.1 | TC22185 | 203  | 104  | 94   | 0.51 | 0.46 | Lycopersicon esculentum clone 133974R, mRNA sequence                                             |
| LesAffx.66600.1.A1_at | AW036163   | TC23173 | 542  | 434  | 249  | 0.8  | 0.46 | Transcribed locus, moderately similar to NP_001045167.1 [Oryza sativa (japonica cultivar-group)] |
| Les.375.1.A1_at       | BG734771   | TC22710 | 1333 | 723  | 612  | 0.54 | 0.46 | Transcribed locus, weakly similar to NP_565660.1 protein [Arabidopsis thaliana]                  |
| LesAffx.3537.1.A1_at  | AJ784726   | TC24068 | 1323 | 945  | 606  | 0.71 | 0.46 | ---                                                                                              |
| LesAffx.57811.1.A1_at | AI488979   | AI48897 | 307  | 165  | 141  | 0.54 | 0.46 | ---                                                                                              |
| Les.5468.1.A1_at      | BT013978.1 | BP88737 | 38   | 34   | 18   | 0.89 | 0.46 | Lycopersicon esculentum clone 133023F, mRNA sequence                                             |
| LesAffx.66270.1.S1_at | BM410146   | TC23074 | 307  | 216  | 140  | 0.7  | 0.46 | Transcribed locus, weakly similar to NP_065597.1 kinase C [Mus musculus]                         |



|                       |            |         |      |      |      |      |      |                                                                                                  |
|-----------------------|------------|---------|------|------|------|------|------|--------------------------------------------------------------------------------------------------|
| Les.861.1.A1_at       | BG627791   | TC23388 | 167  | 113  | 76   | 0.68 | 0.46 | Transcribed locus, moderately similar to NP_001065502.1 [Oryza sativa (japonica cultivar-group)] |
| Les.2478.1.S1_at      | AI780323   | TC21757 | 6008 | 4010 | 2746 | 0.67 | 0.46 | Pathogenesis-related protein P2                                                                  |
| Les.3564.1.S1_at      | X55684.1   | TC24079 | 167  | 109  | 76   | 0.65 | 0.46 | extensin (class I)                                                                               |
| Les.103.1.S1_at       | AJ243451.1 | TC22759 | 233  | 165  | 106  | 0.71 | 0.46 | cyclin A1                                                                                        |
| LesAffx.59375.2.A1_at | CD002142   | TC24048 | 1594 | 1146 | 727  | 0.72 | 0.46 | Transcribed locus, weakly similar to NP_001042037.1 [Oryza sativa (japonica cultivar-group)]     |
| LesAffx.59375.1.A1_at | AI485882   | TC24048 | 966  | 758  | 439  | 0.78 | 0.45 | Transcribed locus, weakly similar to NP_001042037.1 [Oryza sativa (japonica cultivar-group)]     |
| Les.2959.1.S1_at      | BG734632   | TC22039 | 2168 | 1281 | 986  | 0.59 | 0.45 | Lycopersicon esculentum clone 132361R, mRNA sequence                                             |
| LesAffx.71003.1.S1_at | AI779846   | TC22050 | 436  | 393  | 198  | 0.9  | 0.45 | Transcribed locus, weakly similar to NP_001054553.1 [Oryza sativa (japonica cultivar-group)]     |
| LesAffx.69164.1.S1_at | AW649318   | TC22018 | 295  | 159  | 134  | 0.54 | 0.45 | Transcribed locus, weakly similar to NP_001044532.1 [Oryza sativa (japonica cultivar-group)]     |
| LesAffx.65689.1.A1_at | AI486980   | TC22449 | 901  | 817  | 409  | 0.91 | 0.45 | Transcribed locus, weakly similar to NP_001046053.1 [Oryza sativa (japonica cultivar-group)]     |
| LesAffx.7.1.S1_at     | AW931153   | TC22173 | 906  | 504  | 410  | 0.56 | 0.45 | Transcribed locus, weakly similar to XP_001094360.1 lamin B receptor isoform 2 [Macaca mulatta]  |
| LesAffx.65428.1.S1_at | BM411427   | TC22724 | 1819 | 1168 | 822  | 0.64 | 0.45 | Transcribed locus, weakly similar to NP_001043901.1 [Oryza sativa (japonica cultivar-group)]     |
| LesAffx.49201.1.S1_at | AW222231   | TC24148 | 1289 | 774  | 580  | 0.6  | 0.45 | Transcribed locus, weakly similar to XP_001100859.1 hect domain and RLD 3 [Macaca mulatta]       |
| Les.2260.1.A1_at      | AW621278   | TC24093 | 2674 | 1512 | 1204 | 0.57 | 0.45 | Transcribed locus, weakly similar to NP_001059672.1 [Oryza sativa (japonica cultivar-group)]     |
| Les.5301.1.S1_at      | BI204978   | TC22541 | 2747 | 1863 | 1235 | 0.68 | 0.45 | Lycopersicon esculentum clone 132490R, mRNA sequence                                             |
| LesAffx.37764.1.S1_at | CK715143   | CK71514 | 378  | 309  | 170  | 0.82 | 0.45 | ---                                                                                              |
| Les.3369.2.S1_at      | AW934098   | TC23328 | 1529 | 1021 | 686  | 0.67 | 0.45 | Transcribed locus, weakly similar to XP_001096627.1 nuclear VCP-like isoform 4 [Macaca mulatta]  |
| LesAffx.64583.1.S1_at | BM409701   | TC22829 | 700  | 612  | 313  | 0.87 | 0.45 | Transcribed locus, weakly similar to XP_573107.2 hypothetical protein [Rattus norvegicus]        |
| Les.1912.1.A1_at      | BG630127   | TC23947 | 743  | 401  | 332  | 0.54 | 0.45 | Transcribed locus, weakly similar to NP_001042378.1 [Oryza sativa (japonica cultivar-group)]     |
| Les.2459.1.S1_at      | AI896105   | TC22540 | 1293 | 844  | 578  | 0.65 | 0.45 | Transcribed locus, weakly similar to NP_036081.1 activated protein kinase 14 [Mus musculus]      |
| Les.4428.2.S1_at      | CK575032   | TC21729 | 641  | 649  | 286  | 1.01 | 0.45 | carbonic anhydrase                                                                               |

|                       |            |         |      |      |      |      |      |                                                                                                                                       |
|-----------------------|------------|---------|------|------|------|------|------|---------------------------------------------------------------------------------------------------------------------------------------|
| LesAffx.29801.1.A1_at | AI489456   | TC23187 | 288  | 340  | 128  | 1.18 | 0.45 | Transcribed locus, weakly similar to NP_001042186.1 [Oryza sativa (japonica cultivar-group)]                                          |
| Les.224.1.A1_at       | AJ277561.1 | TC21885 | 703  | 472  | 313  | 0.67 | 0.45 | gts1 protein                                                                                                                          |
| Les.3266.3.S1_at      | BI935106   | TC22577 | 1204 | 1102 | 535  | 0.92 | 0.44 | Transcribed locus, moderately similar to NP_001047794.1 [Oryza sativa (japonica cultivar-group)]                                      |
| LesAffx.38499.1.S1_at | AJ785244   | TC23833 | 2287 | 1372 | 1017 | 0.6  | 0.44 | Transcribed locus, moderately similar to NP_001044017.1 [Oryza sativa (japonica cultivar-group)]                                      |
| LesAffx.65306.1.S1_at | AW621362   | TC23246 | 4179 | 2225 | 1858 | 0.53 | 0.44 | Transcribed locus, weakly similar to NP_001062371.1 [Oryza sativa (japonica cultivar-group)]                                          |
| Les.3072.2.S1_at      | BM411575   | TC23388 | 541  | 304  | 241  | 0.56 | 0.44 | MRNA binding protein precursor                                                                                                        |
| Les.4428.1.S1_a_at    | AW443158   | DB69734 | 206  | 230  | 92   | 1.12 | 0.44 | carbonic anhydrase                                                                                                                    |
| LesAffx.31022.1.S1_at | CK715372   | TC23408 | 2312 | 1860 | 1026 | 0.8  | 0.44 | Transcribed locus, weakly similar to NP_001053420.1 [Oryza sativa (japonica cultivar-group)]                                          |
| LesAffx.11805.1.A1_at | CN385556   | TC23159 | 176  | 133  | 78   | 0.75 | 0.44 | Transcribed locus, weakly similar to NP_001041858.1 [Oryza sativa (japonica cultivar-group)]                                          |
| Les.2299.1.A1_at      | BG734604   | TC23692 | 255  | 150  | 113  | 0.59 | 0.44 | Transcribed locus, weakly similar to NP_001042472.1 [Oryza sativa (japonica cultivar-group)]                                          |
| LesAffx.25097.1.S1_at | BI926331   | TC22738 | 375  | 677  | 166  | 1.81 | 0.44 | Transcribed locus, weakly similar to NP_194461.1 factor/ zinc ion binding [Arabidopsis thaliana]                                      |
| LesAffx.48370.1.S1_at | AW929756   | TC22420 | 118  | 90   | 52   | 0.76 | 0.44 | Transcribed locus, moderately similar to NP_001050138.1 [Oryza sativa (japonica cultivar-group)]                                      |
| Les.3544.1.S1_at      | AW930004   | TC21734 | 939  | 955  | 413  | 1.02 | 0.44 | beta-carotene hydroxylase                                                                                                             |
| Les.695.1.A1_at       | BG626949   | TC23503 | 321  | 173  | 141  | 0.54 | 0.44 | Transcribed locus, weakly similar to NP_001042986.1 [Oryza sativa (japonica cultivar-group)]                                          |
| LesAffx.68320.1.S1_at | BM535633   | ES89343 | 1160 | 1032 | 509  | 0.89 | 0.44 | Transcribed locus, weakly similar to NP_001065587.1 [Oryza sativa (japonica cultivar-group)]                                          |
| Les.3072.3.S1_at      | BG129667   | TC23388 | 675  | 359  | 296  | 0.53 | 0.44 | MRNA binding protein precursor                                                                                                        |
| Les.5861.1.S1_at      | BF050616   | TC24194 | 1748 | 901  | 765  | 0.52 | 0.44 | Lycopersicon esculentum clone 133886R, mRNA sequence                                                                                  |
| LesAffx.45315.4.S1_at | AW622607   | TC23315 | 2815 | 2717 | 1231 | 0.97 | 0.44 | Transcribed locus, weakly similar to XP_001105252.1 similar to NAD(P)H:quinone oxidoreductase type 3, polypeptide A2 [Macaca mulatta] |
| Les.4050.1.S1_at      | L26982.1   |         | 409  | 211  | 179  | 0.52 | 0.44 | Lycopersicon esculentum (DB173) mRNA fragment                                                                                         |
| Les.1603.1.A1_at      | BG630194   | TC23278 | 109  | 60   | 47   | 0.55 | 0.44 | Transcribed locus, weakly similar to NP_001043493.1 [Oryza sativa (japonica cultivar-group)]                                          |
| Les.2964.2.S1_at      | BI923596   | TC22145 | 266  | 232  | 116  | 0.87 | 0.44 | Transcribed locus, weakly similar to NP_001042324.1 [Oryza sativa (japonica cultivar-group)]                                          |
| LesAffx.17150.1.A1_at | AW039265   | TC23237 | 244  | 142  | 106  | 0.58 | 0.43 | Nitrite reductase                                                                                                                     |

|                       |            |         |      |      |      |      |      |                                                                                                       |
|-----------------------|------------|---------|------|------|------|------|------|-------------------------------------------------------------------------------------------------------|
| LesAffx.65757.1.S1_at | AW624713   | TC21840 | 460  | 363  | 200  | 0.79 | 0.43 | Transcribed locus, weakly similar to NP_001053836.1 [Oryza sativa (japonica cultivar-group)]          |
| LesAffx.41333.2.S1_at | AW934014   | TC23167 | 243  | 248  | 105  | 1.02 | 0.43 | Transcribed locus, weakly similar to XP_001111662.1 protein phosphatase 1B isoform 6 [Macaca mulatta] |
| Les.4270.1.S1_at      | AF112368.1 | TC23183 | 3350 | 2288 | 1450 | 0.68 | 0.43 | catalase 2                                                                                            |
| Les.4471.1.S1_at      | AF514776.1 | TC22151 | 1961 | 1121 | 848  | 0.57 | 0.43 | dCK/dGK-like deoxyribonucleoside kinase                                                               |
| Les.2985.1.A1_at      | BG626023   | TC23280 | 413  | 222  | 179  | 0.54 | 0.43 | Transcribed locus, weakly similar to NP_001051630.1 [Oryza sativa (japonica cultivar-group)]          |
| LesAffx.67955.1.S1_at | BM409816   | TC24493 | 2549 | 1462 | 1100 | 0.57 | 0.43 | Transcribed locus, weakly similar to NP_001045017.1 [Oryza sativa (japonica cultivar-group)]          |
| Les.266.1.S1_at       | M84801.1   | AI48785 | 96   | 54   | 41   | 0.56 | 0.43 | prosystemin                                                                                           |
| Les.2121.1.A1_at      | AY292201.1 | TC22352 | 489  | 282  | 210  | 0.58 | 0.43 | defense-signaling glycopeptide hormone precursor                                                      |
| Les.1097.1.A1_at      | BG629366   | TC22902 | 1250 | 1196 | 537  | 0.96 | 0.43 | Transcribed locus, weakly similar to XP_001097818.1 similar to F46E10.1a [Macaca mulatta]             |
| LesAffx.12783.1.A1_at | AI485230   | AI48523 | 71   | 54   | 31   | 0.76 | 0.43 | ---                                                                                                   |
| LesAffx.41703.1.A1_at | BG352060   | TC23987 | 676  | 602  | 290  | 0.89 | 0.43 | Transcribed locus, moderately similar to NP_001062462.1 [Oryza sativa (japonica cultivar-group)]      |
| Les.1968.1.A1_at      | BG628724   | TC23891 | 648  | 527  | 277  | 0.81 | 0.43 | Transcribed locus, weakly similar to NP_001065587.1 [Oryza sativa (japonica cultivar-group)]          |
| Les.1966.1.A1_at      | BG629907   | TC23932 | 111  | 77   | 47   | 0.7  | 0.43 | Transcribed locus                                                                                     |
| Les.2568.2.S1_at      | BI207248   | TC23413 | 1929 | 1255 | 822  | 0.65 | 0.43 | Transcribed locus, moderately similar to NP_001048363.1 [Oryza sativa (japonica cultivar-group)]      |
| Les.3644.1.S1_at      | X86452.1   | TC23849 | 1616 | 1012 | 687  | 0.63 | 0.42 | lycopene beta-cyclase                                                                                 |
| Les.1248.2.A1_at      | BT012749.1 | TC21728 | 558  | 302  | 237  | 0.54 | 0.42 | GDP-mannose pyrophosphorylase                                                                         |
| Les.228.1.S1_a_at     | CK714929   | TC23208 | 5136 | 4416 | 2181 | 0.86 | 0.42 | hypothetical LOC543672                                                                                |
| LesAffx.67482.1.S1_at | BG123945   | TC23975 | 197  | 177  | 84   | 0.9  | 0.42 | ---                                                                                                   |
| LesAffx.66600.1.S1_at | AW040689   | TC23173 | 1261 | 839  | 535  | 0.67 | 0.42 | Transcribed locus, moderately similar to NP_001045167.1 [Oryza sativa (japonica cultivar-group)]      |
| LesAffx.1276.1.S1_at  | BG130074   | TC23044 | 1826 | 1244 | 774  | 0.68 | 0.42 | Transcribed locus, weakly similar to NP_001043284.1 [Oryza sativa (japonica cultivar-group)]          |
| Les.184.1.S1_at       | L46681.1   | TC21791 | 5572 | 3117 | 2352 | 0.56 | 0.42 | aspartic protease precursor                                                                           |
| LesAffx.1276.2.S1_at  | AI484083   | TC23044 | 2643 | 1753 | 1114 | 0.66 | 0.42 | Transcribed locus, weakly similar to NP_001043284.1 [Oryza sativa (japonica cultivar-group)]          |
| Les.4083.1.S1_at      | BG735070   | TC22596 | 6281 | 4130 | 2647 | 0.66 | 0.42 | Lycopersicon esculentum clone 132756F, mRNA sequence                                                  |
| Les.470.1.S1_at       | BG134628   | TC23506 | 59   | 48   | 25   | 0.81 | 0.42 | Transcribed locus, weakly similar to NP_200423.2 protein [Arabidopsis thaliana]                       |

|                       |            |         |      |      |      |      |      |                                                                                                              |
|-----------------------|------------|---------|------|------|------|------|------|--------------------------------------------------------------------------------------------------------------|
| LesAffx.3918.1.S1_at  | BM410706   | TC21958 | 1405 | 1617 | 584  | 1.15 | 0.42 | Transcribed locus, weakly similar to NP_001047111.1 [Oryza sativa (japonica cultivar-group)]                 |
| LesAffx.26970.1.S1_at | BF050591   | BF05059 | 271  | 161  | 112  | 0.59 | 0.41 | ---                                                                                                          |
| Les.2946.2.S1_at      | BG130169   | TC22071 | 4786 | 4060 | 1981 | 0.85 | 0.41 | CDNA, clone: FC16CC05, HTC in fruit                                                                          |
| Les.3180.1.S1_at      | AI775150   | DB70250 | 249  | 149  | 103  | 0.6  | 0.41 | Transcribed locus, weakly similar to NP_001048006.1 [Oryza sativa (japonica cultivar-group)]                 |
| Les.2886.1.A1_at      | BG628514   | TC24034 | 317  | 486  | 131  | 1.53 | 0.41 | Transcribed locus, weakly similar to NP_001042068.1 [Oryza sativa (japonica cultivar-group)]                 |
| Les.2478.1.S1_a_at    | AI780323   | TC21757 | 8977 | 5974 | 3687 | 0.67 | 0.41 | Pathogenesis-related protein P2                                                                              |
| Les.3549.1.A1_at      | AF096252.1 | TC23183 | 278  | 188  | 114  | 0.68 | 0.41 | ethylene-responsive catalase                                                                                 |
| Les.3477.1.S1_at      | AF230198.2 | TC23205 | 64   | 34   | 26   | 0.54 | 0.41 | hypothetical LOC543641                                                                                       |
| LesAffx.23546.1.S1_at | BG126449   | TC22663 | 6952 | 4299 | 2840 | 0.62 | 0.41 | Transcribed locus, moderately similar to NP_001043331.1 [Oryza sativa (japonica cultivar-group)]             |
| Les.3113.1.S1_at      | BG131753   | TC21889 | 294  | 204  | 120  | 0.69 | 0.41 | Transcribed locus, weakly similar to XP_001101334.1 sterol-C4-methyl oxidase-like isoform 1 [Macaca mulatta] |
| Les.4428.1.S1_at      | AW443158   | DB69734 | 121  | 145  | 49   | 1.2  | 0.41 | carbonic anhydrase                                                                                           |
| LesAffx.51226.1.S1_at | AI779132   | TC21742 | 589  | 475  | 239  | 0.81 | 0.41 | Transcribed locus, strongly similar to NP_054512.1 f [Nicotiana tabacum]                                     |
| Les.376.1.S1_at       | BG627516   | TC24390 | 3865 | 2486 | 1566 | 0.64 | 0.41 | ribulose-1,5-bisphosphate carboxylase, small subunit precursor                                               |
| Les.3740.1.S1_at      | X73986.1   | TC24046 | 1543 | 1145 | 622  | 0.74 | 0.4  | cathepsin D inhibitor protein                                                                                |
| LesAffx.3537.1.S1_at  | AJ784726   | TC24068 | 293  | 229  | 118  | 0.78 | 0.4  | ---                                                                                                          |
| Les.2861.1.S1_at      | BM412879   | TC23421 | 701  | 867  | 282  | 1.24 | 0.4  | Transcribed locus, weakly similar to NP_201222.1 protein [Arabidopsis thaliana]                              |
| LesAffx.70112.1.S1_at | AW092445   | TC22090 | 268  | 150  | 108  | 0.56 | 0.4  | Transcribed locus, moderately similar to NP_001044346.1 [Oryza sativa (japonica cultivar-group)]             |
| Les.3174.1.S1_at      | BT012701.1 | TC22568 | 446  | 449  | 179  | 1    | 0.4  | Lycopersicon esculentum clone 113575F, mRNA sequence                                                         |
| Les.4727.1.S1_at      | AI776392   |         | 2702 | 1999 | 1081 | 0.74 | 0.4  | Lycopersicon esculentum clone 133381R, mRNA sequence                                                         |
| LesAffx.65428.2.A1_at | AW429084   | TC22724 | 1202 | 806  | 480  | 0.67 | 0.4  | Transcribed locus, weakly similar to NP_001043901.1 [Oryza sativa (japonica cultivar-group)]                 |
| Les.4050.1.A1_at      | L26982.1   |         | 387  | 219  | 153  | 0.56 | 0.4  | Lycopersicon esculentum (DB173) mRNA fragment                                                                |
| LesAffx.68945.1.S1_at | BM413364   | TC23656 | 1041 | 955  | 412  | 0.92 | 0.4  | Transcribed locus, weakly similar to NP_009952.2 ORF; Ycr023cp [Saccharomyces cerevisiae]                    |
| Les.228.1.S1_at       | CK714929   | TC23208 | 2987 | 2479 | 1178 | 0.83 | 0.39 | hypothetical LOC543672                                                                                       |
| LesAffx.13481.2.S1_at | BI921546   | TC22621 | 1481 | 1682 | 584  | 1.14 | 0.39 | Transcribed locus, weakly similar to NP_001044052.1 [Oryza sativa (japonica cultivar-group)]                 |
| Les.1198.1.A1_at      | BG630006   | TC22356 | 88   | 45   | 35   | 0.51 | 0.39 | Transcribed locus, weakly similar to XP_001111095.1 aldolase B isoform 5 [Macaca mulatta]                    |

|                       |            |         |      |      |      |      |      |                                                                                                                                 |
|-----------------------|------------|---------|------|------|------|------|------|---------------------------------------------------------------------------------------------------------------------------------|
| LesAffx.56.3.S1_at    | BG132247   | TC23902 | 1413 | 1056 | 556  | 0.75 | 0.39 | Transcribed locus, weakly similar to NP_004311.1 Ca++ transporting, fast twitch 1 isoform b [Homo sapiens]                      |
| Les.3017.2.S1_at      | AW738744   | TC23031 | 1738 | 879  | 684  | 0.51 | 0.39 | Transcribed locus, weakly similar to XP_001084411.1 aquaporin 1 [Macaca mulatta]                                                |
| Les.3314.1.S1_at      | BG626710   | TC23439 | 4197 | 2609 | 1649 | 0.62 | 0.39 | glycolate oxidase                                                                                                               |
| Les.4849.1.S1_at      | BT012755.1 | TC21877 | 871  | 597  | 342  | 0.69 | 0.39 | Lycopersicon esculentum clone 113699R, mRNA sequence                                                                            |
| Les.5831.1.S1_at      | BT013888.1 | TC21723 | 3075 | 1867 | 1202 | 0.61 | 0.39 | malate dehydrogenase                                                                                                            |
| Les.2219.1.A1_at      | BG735134   | TC23582 | 799  | 405  | 311  | 0.51 | 0.39 | Transcribed locus, weakly similar to NP_568624.1 protein [Arabidopsis thaliana]                                                 |
| Les.2633.1.A1_at      | BG628982   | TC22918 | 185  | 151  | 72   | 0.81 | 0.39 | Transcribed locus, weakly similar to NP_001042177.1 [Oryza sativa (japonica cultivar-group)]                                    |
| Les.2568.1.S1_at      | BI922309   | TC23413 | 1053 | 724  | 405  | 0.69 | 0.38 | Transcribed locus, moderately similar to NP_001048363.1 [Oryza sativa (japonica cultivar-group)]                                |
| Les.2886.3.S1_at      | AW038176   | TC22563 | 86   | 128  | 33   | 1.49 | 0.38 | Transcribed locus, weakly similar to NP_001042068.1 [Oryza sativa (japonica cultivar-group)]                                    |
| Les.692.1.S1_at       | BE434920   | TC23136 | 1591 | 1406 | 610  | 0.88 | 0.38 | Transcribed locus, weakly similar to NP_001042690.1 [Oryza sativa (japonica cultivar-group)]                                    |
| Les.1596.1.A1_at      | BG627098   | TC23373 | 2181 | 2030 | 833  | 0.93 | 0.38 | Transcribed locus, moderately similar to NP_001051136.1 [Oryza sativa (japonica cultivar-group)]                                |
| Les.4299.1.S1_at      | BG625870   | TC21761 | 6953 | 4545 | 2655 | 0.65 | 0.38 | Lycopersicon esculentum clone 134170F, mRNA sequence                                                                            |
| LesAffx.41703.1.S1_at | BG352060   | TC23987 | 167  | 145  | 64   | 0.87 | 0.38 | Transcribed locus, moderately similar to NP_001062462.1 [Oryza sativa (japonica cultivar-group)]                                |
| Les.3742.1.S1_at      | AF146690.1 | TC22347 | 1651 | 925  | 629  | 0.56 | 0.38 | Pto-responsive gene 1 protein                                                                                                   |
| Les.745.1.A1_at       | BG627244   | GT16450 | 925  | 556  | 351  | 0.6  | 0.38 | Transcribed locus                                                                                                               |
| Les.2038.1.A1_at      | BG631023   | TC23348 | 529  | 453  | 201  | 0.86 | 0.38 | Transcribed locus, weakly similar to NP_199407.1 ester hydrolase/ hydrolase, acting on ester bonds [Arabidopsis thaliana]       |
| LesAffx.54522.1.S1_at | BM411853   | TC22000 | 2395 | 1286 | 906  | 0.54 | 0.38 | Transcribed locus, weakly similar to XP_001101267.1 similar to myeloblastosis proto-oncogene product isoform 2 [Macaca mulatta] |
| Les.804.1.S1_at       | AW094303   | TC22945 | 2812 | 2154 | 1063 | 0.77 | 0.38 | Transcribed locus                                                                                                               |
| Les.608.1.S1_at       | BG628276   | TC21796 | 4264 | 2640 | 1608 | 0.62 | 0.38 | Lycopersicon esculentum clone 133776F, mRNA sequence                                                                            |
| LesAffx.38499.1.A1_at | BI209699   | TC22324 | 464  | 334  | 175  | 0.72 | 0.38 | Transcribed locus, moderately similar to NP_001044017.1 [Oryza sativa (japonica cultivar-group)]                                |
| Les.3073.1.S1_at      | AJ785415   | TC21760 | 221  | 135  | 83   | 0.61 | 0.38 | Fruit-ripening protein                                                                                                          |
| Les.3488.1.S1_at      | AF348461.1 | TC21724 | 1018 | 565  | 382  | 0.55 | 0.38 | cryptochrome 1b                                                                                                                 |
| LesAffx.37344.2.S1_at | BG131634   | TC21881 | 337  | 233  | 126  | 0.69 | 0.38 | Transcribed locus, weakly similar to NP_001042390.1 [Oryza sativa (japonica cultivar-group)]                                    |
| Les.3550.1.S1_at      | AF096251.1 | TC24195 | 308  | 277  | 116  | 0.9  | 0.37 | ethylene-responsive heat shock protein cognate 70                                                                               |

|                       |            |         |      |      |      |      |      |                                                                                                                                          |
|-----------------------|------------|---------|------|------|------|------|------|------------------------------------------------------------------------------------------------------------------------------------------|
| Les.112.1.S1_at       | BG734834   | TC21719 | 3221 | 1757 | 1203 | 0.55 | 0.37 | zeaxanthin epoxidase                                                                                                                     |
| Les.3648.1.S1_at      | X95270.1   | TC21719 | 259  | 171  | 97   | 0.66 | 0.37 | subtilisin-like endoprotease                                                                                                             |
| Les.3290.2.S1_at      | AI778507   | TC22209 | 24   | 13   | 9    | 0.56 | 0.37 | Transcribed locus, weakly similar to XP_001093616.1 glutamic-pyruvate transaminase (alanine aminotransferase) isoform 1 [Macaca mulatta] |
| Les.2173.1.A1_at      | BG631444   | TC23409 | 250  | 250  | 92   | 1    | 0.37 | Transcribed locus, weakly similar to NP_001044532.1 [Oryza sativa (japonica cultivar-group)]                                             |
| Les.4085.1.S1_at      | BE459897   | TC23484 | 2268 | 1223 | 830  | 0.54 | 0.37 | Lycopersicon esculentum (DB264) meloidogyne-induced giant cell protein mRNA, 3' end                                                      |
| Les.3119.1.A1_at      | AW037265   | TC23253 | 360  | 226  | 132  | 0.63 | 0.37 | Transcribed locus, weakly similar to XP_001094505.1 proteasome 26S non-ATPase subunit 3 isoform 4 [Macaca mulatta]                       |
| LesAffx.63776.1.S1_at | BM408779   | TC22982 | 215  | 155  | 79   | 0.72 | 0.37 | Transcribed locus, weakly similar to NP_001057034.1 [Oryza sativa (japonica cultivar-group)]                                             |
| Les.1997.2.S1_at      | AI898214   | TC23947 | 618  | 315  | 225  | 0.51 | 0.36 | Transcribed locus, weakly similar to NP_001737.1 precursor [Homo sapiens]                                                                |
| Les.3552.1.A1_at      | AF081021.1 | TC24327 | 56   | 32   | 20   | 0.58 | 0.36 | hypoxia-induced protein 242                                                                                                              |
| LesAffx.34986.1.A1_at | CK715664   | TC23304 | 545  | 371  | 198  | 0.68 | 0.36 | Transcribed locus, weakly similar to NP_001048569.1 [Oryza sativa (japonica cultivar-group)]                                             |
| LesAffx.5.1.S1_at     | AW621769   | TC22795 | 3317 | 1958 | 1206 | 0.59 | 0.36 | Transcribed locus, weakly similar to XP_001071653.1 similar to Protein patched homolog 2 (PTC2) [Rattus norvegicus]                      |
| Les.3995.1.S1_at      | AW443014   | TC21771 | 882  | 557  | 318  | 0.63 | 0.36 | methionine rich arabinogalactan                                                                                                          |
| Les.3113.2.S1_at      | AI780108   | FS20183 | 254  | 170  | 91   | 0.67 | 0.36 | Transcribed locus, weakly similar to XP_001101334.1 sterol-C4-methyl oxidase-like isoform 1 [Macaca mulatta]                             |
| Les.1655.1.A1_at      | BG627771   | BG62777 | 81   | 48   | 29   | 0.59 | 0.36 | Transcribed locus                                                                                                                        |
| Les.3119.3.S1_at      | AW092353   | TC23253 | 391  | 266  | 139  | 0.68 | 0.36 | Transcribed locus, weakly similar to XP_001094505.1 proteasome 26S non-ATPase subunit 3 isoform 4 [Macaca mulatta]                       |
| Les.3621.1.S1_at      | K03290.1   | BG63088 | 1947 | 1725 | 690  | 0.89 | 0.35 | wound-induced proteinase inhibitor I prepropeptide                                                                                       |
| LesAffx.20929.1.S1_at | BI206813   | TC23621 | 307  | 235  | 107  | 0.76 | 0.35 | Transcribed locus, weakly similar to NP_001051650.1 [Oryza sativa (japonica cultivar-group)]                                             |
| LesAffx.55337.1.S1_at | BM410261   | TC22580 | 1547 | 1391 | 540  | 0.9  | 0.35 | Transcribed locus, weakly similar to NP_001043235.1 [Oryza sativa (japonica cultivar-group)]                                             |
| Les.2024.1.A1_at      | BG631036   | TC23275 | 977  | 532  | 341  | 0.54 | 0.35 | Transcribed locus, weakly similar to XP_001105201.1 fructose-1,6-bisphosphatase 1 isoform 1 [Macaca mulatta]                             |
| Les.4844.1.S1_at      | BI921923   | TC23893 | 1434 | 826  | 501  | 0.58 | 0.35 | Lycopersicon esculentum clone 113684R, mRNA sequence                                                                                     |
| LesAffx.18330.1.S1_at | BG129699   | TC24342 | 534  | 335  | 186  | 0.63 | 0.35 | Transcribed locus, weakly similar to NP_001046074.1 [Oryza sativa (japonica cultivar-group)]                                             |
| Les.4493.1.S1_at      | BG734807   | TC22690 | 2033 | 1142 | 705  | 0.56 | 0.35 | ADP/ATP translocator                                                                                                                     |
| LesAffx.67368.1.S1_at | BG126810   | BG12681 | 164  | 89   | 57   | 0.54 | 0.35 | ---                                                                                                                                      |

|                       |            |         |      |      |     |      |      |                                                                                                                                       |
|-----------------------|------------|---------|------|------|-----|------|------|---------------------------------------------------------------------------------------------------------------------------------------|
| Les.2888.1.S1_at      | AI491181   | TC22589 | 2368 | 1528 | 818 | 0.65 | 0.35 | Lycopersicon esculentum clone 113533R, mRNA sequence                                                                                  |
| Les.614.1.A1_at       | BG626522   | BG62652 | 240  | 156  | 83  | 0.65 | 0.35 | Transcribed locus                                                                                                                     |
| Les.110.1.S1_at       | AF154423.1 | TC22330 | 902  | 513  | 312 | 0.57 | 0.35 | TBG5 protein                                                                                                                          |
| Les.3210.2.A1_a_at    | AJ320060   | TC22662 | 441  | 371  | 152 | 0.84 | 0.35 | Transcribed locus                                                                                                                     |
| LesAffx.34276.2.A1_at | AJ784451   | TC22379 | 208  | 116  | 72  | 0.56 | 0.35 | Transcribed locus, weakly similar to NP_001043674.1 [Oryza sativa (japonica cultivar-group)]                                          |
| Les.1923.1.S1_at      | BG630193   | TC23497 | 247  | 168  | 85  | 0.68 | 0.34 | Transcribed locus, moderately similar to NP_001066340.1 [Oryza sativa (japonica cultivar-group)]                                      |
| Les.971.1.A1_at       | CK575003   | TC22472 | 1600 | 1593 | 551 | 1    | 0.34 | Transcribed locus, weakly similar to NP_001043235.1 [Oryza sativa (japonica cultivar-group)]                                          |
| Les.3210.2.A1_at      | AJ320060   | TC22662 | 1152 | 990  | 395 | 0.86 | 0.34 | Transcribed locus                                                                                                                     |
| LesAffx.55225.1.A1_at | AJ785322   | TC23525 | 279  | 207  | 96  | 0.74 | 0.34 | Transcribed locus, weakly similar to NP_001043082.1 [Oryza sativa (japonica cultivar-group)]                                          |
| Les.4868.1.S1_at      | BT012795.1 | TC22912 | 98   | 66   | 33  | 0.67 | 0.34 | Lycopersicon esculentum clone 113794R, mRNA sequence                                                                                  |
| Les.3297.3.S1_at      | BM410357   | TC22153 | 222  | 114  | 76  | 0.51 | 0.34 | Transcribed locus, weakly similar to NP_001043493.1 [Oryza sativa (japonica cultivar-group)]                                          |
| Les.5745.1.S1_at      | BT014484.1 | TC22393 | 462  | 268  | 157 | 0.58 | 0.34 | Lycopersicon esculentum clone 133838F, mRNA sequence                                                                                  |
| Les.1832.1.A1_at      | BG629451   | TC23307 | 774  | 1188 | 262 | 1.53 | 0.34 | Transcribed locus, moderately similar to NP_001062542.1 [Oryza sativa (japonica cultivar-group)]                                      |
| Les.3119.2.S1_at      | BI927792   | TC23253 | 232  | 146  | 79  | 0.63 | 0.34 | Transcribed locus, weakly similar to XP_001094505.1 proteasome 26S non-ATPase subunit 3 isoform 4 [Macaca mulatta]                    |
| Les.5017.1.S1_at      | BT013110.1 | TC23613 | 201  | 157  | 67  | 0.78 | 0.33 | Lycopersicon esculentum clone 114397F, mRNA sequence                                                                                  |
| Les.3210.1.S1_at      | AI483637   | TC22662 | 819  | 687  | 272 | 0.84 | 0.33 | Transcribed locus                                                                                                                     |
| LesAffx.344.6.S1_at   | BI934296   | TC23230 | 1093 | 1106 | 361 | 1.01 | 0.33 | Transcribed locus, weakly similar to NP_001047408.1 [Oryza sativa (japonica cultivar-group)]                                          |
| Les.2063.1.A1_at      | BG631371   | TC24473 | 54   | 37   | 18  | 0.69 | 0.33 | Transcribed locus                                                                                                                     |
| Les.3180.2.S1_at      | AI775197   | TC22419 | 224  | 131  | 73  | 0.59 | 0.33 | Transcribed locus, weakly similar to NP_001048006.1 [Oryza sativa (japonica cultivar-group)]                                          |
| LesAffx.66331.1.S1_at | BI421673   | TC21932 | 243  | 195  | 79  | 0.8  | 0.33 | Transcribed locus, weakly similar to NP_001056463.1 [Oryza sativa (japonica cultivar-group)]                                          |
| Les.3593.1.S1_at      | BT012763.1 | TC23407 | 1370 | 1253 | 448 | 0.91 | 0.33 | TAS14 peptide (AA 1-130)                                                                                                              |
| Les.490.1.A1_at       | BG625891   | TC22945 | 275  | 163  | 89  | 0.59 | 0.33 | Transcribed locus, weakly similar to XP_001108145.1 similar to nucleotide binding protein-like [Macaca mulatta]                       |
| Les.3127.2.S1_at      | AW091641   | TC22823 | 2675 | 2117 | 866 | 0.79 | 0.32 | Transcribed locus, weakly similar to XP_001096387.1 similar to serine hydroxymethyltransferase 1 (soluble) isoform 1 [Macaca mulatta] |
| Les.3527.1.S1_at      | AY008278.1 | TC21750 | 1988 | 1271 | 641 | 0.64 | 0.32 | lipoygenase                                                                                                                           |

|                       |            |         |      |      |      |      |      |                                                                                                                                       |
|-----------------------|------------|---------|------|------|------|------|------|---------------------------------------------------------------------------------------------------------------------------------------|
| Les.2131.1.A1_at      | BG627099   | TC22249 | 2846 | 2985 | 913  | 1.05 | 0.32 | Transcribed locus, weakly similar to NP_001050262.1 [Oryza sativa (japonica cultivar-group)]                                          |
| LesAffx.11659.1.A1_at | BI422229   | TC24331 | 1344 | 858  | 431  | 0.64 | 0.32 | Transcribed locus, weakly similar to XP_001109382.1 fumarylacetoacetate hydrolase (fumarylacetoacetase) isoform 1 [Macaca mulatta]    |
| LesAffx.71242.2.S1_at | AW093460   | TC22502 | 389  | 209  | 125  | 0.54 | 0.32 | Transcribed locus, weakly similar to NP_001051053.1 [Oryza sativa (japonica cultivar-group)]                                          |
| LesAffx.69296.1.A1_at | AW092917   | TC22654 | 533  | 371  | 169  | 0.7  | 0.32 | Transcribed locus, weakly similar to NP_001045764.1 [Oryza sativa (japonica cultivar-group)]                                          |
| LesAffx.65682.1.A1_at | AI489857   | TC22844 | 1175 | 847  | 369  | 0.72 | 0.31 | Transcribed locus, weakly similar to XP_215626.3 similar to recombination activating gene 1 gene activation [Rattus norvegicus]       |
| LesAffx.21904.1.S1_at | BM536146   | TC23302 | 353  | 209  | 111  | 0.59 | 0.31 | Transcribed locus, weakly similar to NP_001048363.1 [Oryza sativa (japonica cultivar-group)]                                          |
| LesAffx.37588.1.S1_at | BG124246   | TC21902 | 72   | 59   | 22   | 0.82 | 0.31 | Transcribed locus, weakly similar to NP_001046132.1 [Oryza sativa (japonica cultivar-group)]                                          |
| Les.172.2.S1_a_at     | BT014416.1 | TC22899 | 3766 | 2380 | 1176 | 0.63 | 0.31 | SPM1 protein                                                                                                                          |
| Les.3668.1.S1_at      | U09026.1   | TC21838 | 2019 | 1331 | 629  | 0.66 | 0.31 | lipoxygenase                                                                                                                          |
| Les.5157.1.S1_at      | BT013405.1 | TC23882 | 2180 | 1562 | 676  | 0.72 | 0.31 | Lycopersicon esculentum clone 135719R, mRNA sequence                                                                                  |
| Les.3127.1.S1_at      | AW092318   | TC22823 | 2787 | 2027 | 860  | 0.73 | 0.31 | Transcribed locus, weakly similar to XP_001096387.1 similar to serine hydroxymethyltransferase 1 (soluble) isoform 1 [Macaca mulatta] |
| Les.986.1.S1_at       | AI897984   | TC22607 | 837  | 627  | 258  | 0.75 | 0.31 | Mitochondrial malate dehydrogenase                                                                                                    |
| LesAffx.34986.1.S1_at | CK715664   | TC23304 | 257  | 173  | 79   | 0.67 | 0.31 | Transcribed locus, weakly similar to NP_001048569.1 [Oryza sativa (japonica cultivar-group)]                                          |
| LesAffx.58481.1.A1_at | BM535000   | TC23994 | 385  | 304  | 116  | 0.79 | 0.3  | Transcribed locus, weakly similar to NP_001062260.1 [Oryza sativa (japonica cultivar-group)]                                          |
| LesAffx.34276.2.S1_at | AJ784451   | TC22379 | 521  | 271  | 156  | 0.52 | 0.3  | Transcribed locus, weakly similar to NP_001043674.1 [Oryza sativa (japonica cultivar-group)]                                          |
| Les.4291.2.S1_at      | AW649205   | TC22682 | 3897 | 2121 | 1162 | 0.54 | 0.3  | Transcribed locus, weakly similar to NP_001044127.1 [Oryza sativa (japonica cultivar-group)]                                          |
| LesAffx.41477.1.S1_at | AI782352   | TC22420 | 1454 | 889  | 430  | 0.61 | 0.3  | Transcribed locus, weakly similar to NP_001041763.1 [Oryza sativa (japonica cultivar-group)]                                          |
| LesAffx.16710.2.S1_at | AI899221   | TC23788 | 742  | 616  | 219  | 0.83 | 0.3  | Transcribed locus, weakly similar to XP_001097418.1 aquaporin 4 isoform 5 [Macaca mulatta]                                            |
| Les.2964.3.A1_at      | BG626300   | TC23599 | 896  | 686  | 264  | 0.77 | 0.29 | Transcribed locus, weakly similar to NP_001042324.1 [Oryza sativa (japonica cultivar-group)]                                          |
| Les.3166.1.S1_at      | AI775188   | TC23957 | 126  | 103  | 37   | 0.82 | 0.29 | Transcribed locus, weakly similar to NP_001047732.1 [Oryza sativa (japonica cultivar-group)]                                          |



|                       |            |         |      |      |      |      |      |                                                                                              |
|-----------------------|------------|---------|------|------|------|------|------|----------------------------------------------------------------------------------------------|
| Les.2809.1.S1_at      | BT014540.1 | TC24080 | 614  | 349  | 180  | 0.57 | 0.29 | Lycopersicon esculentum clone 133955F, mRNA sequence                                         |
| LesAffx.55337.2.S1_at | AW738358   | TC22580 | 731  | 668  | 213  | 0.91 | 0.29 | Transcribed locus, weakly similar to NP_001043235.1 [Oryza sativa (japonica cultivar-group)] |
| LesAffx.41477.2.S1_at | BI924534   | TC22420 | 1432 | 817  | 416  | 0.57 | 0.29 | Transcribed locus, weakly similar to NP_001041763.1 [Oryza sativa (japonica cultivar-group)] |
| Les.4291.1.S1_at      | BI934076   | TC22682 | 3187 | 1788 | 924  | 0.56 | 0.29 | Transcribed locus, weakly similar to NP_001044127.1 [Oryza sativa (japonica cultivar-group)] |
| Les.2131.2.S1_at      | BE433043   | TC22249 | 3124 | 3416 | 901  | 1.09 | 0.29 | Transcribed locus, weakly similar to NP_001050262.1 [Oryza sativa (japonica cultivar-group)] |
| LesAffx.69296.1.S1_at | AW092917   | TC22654 | 1334 | 842  | 382  | 0.63 | 0.29 | Transcribed locus, weakly similar to NP_001045764.1 [Oryza sativa (japonica cultivar-group)] |
| LesAffx.14110.2.A1_at | AW932597   | TC23949 | 222  | 131  | 64   | 0.59 | 0.29 | Transcribed locus, weakly similar to NP_001042660.1 [Oryza sativa (japonica cultivar-group)] |
| Les.672.1.S1_at       | BM536270   | TC22195 | 512  | 278  | 146  | 0.54 | 0.29 | Transcribed locus, weakly similar to NP_001042227.1 [Oryza sativa (japonica cultivar-group)] |
| Les.3924.1.S1_at      | BE433308   | TC23702 | 4474 | 3740 | 1265 | 0.84 | 0.28 | Hypothetical protein LOC778199                                                               |
| Les.2909.2.S1_at      | BM413099   | TC22288 | 3596 | 1936 | 1011 | 0.54 | 0.28 | Transcribed locus, weakly similar to NP_001041799.1 [Oryza sativa (japonica cultivar-group)] |
| Les.233.1.S1_at       | M17558.1   | TC23200 | 2526 | 1387 | 694  | 0.55 | 0.27 | chlorophyll a/b-binding protein precursor                                                    |
| Les.2457.1.A1_at      | BG630077   | TC22085 | 1431 | 1075 | 392  | 0.75 | 0.27 | Transcribed locus                                                                            |
| Les.1219.1.A1_at      | BG630155   | TC23499 | 149  | 127  | 41   | 0.85 | 0.27 | Transcribed locus, weakly similar to NP_001047376.1 [Oryza sativa (japonica cultivar-group)] |
| LesAffx.21101.1.S1_at | BI924446   | TC21935 | 171  | 95   | 46   | 0.55 | 0.27 | Transcribed locus, weakly similar to NP_001047732.1 [Oryza sativa (japonica cultivar-group)] |
| Les.4975.1.S1_at      | BT013032.1 | TC23130 | 451  | 369  | 121  | 0.82 | 0.27 | Lycopersicon esculentum clone 114280F, mRNA sequence                                         |
| Les.3515.1.S1_at      | AF242849.1 | TC21891 | 561  | 480  | 150  | 0.86 | 0.27 | wound-inducible carboxypeptidase                                                             |
| Les.2909.1.S1_at      | AW223174   | TC24474 | 2561 | 1319 | 678  | 0.51 | 0.26 | Transcribed locus, weakly similar to NP_001041799.1 [Oryza sativa (japonica cultivar-group)] |
| Les.5017.1.A1_at      | BT013110.1 | TC23613 | 570  | 389  | 150  | 0.68 | 0.26 | Lycopersicon esculentum clone 114397F, mRNA sequence                                         |
| LesAffx.14110.2.S1_at | AW932597   | TC23949 | 1580 | 852  | 412  | 0.54 | 0.26 | Transcribed locus, weakly similar to NP_001042660.1 [Oryza sativa (japonica cultivar-group)] |
| Les.2971.2.A1_at      | BG629234   | TC23191 | 3454 | 3463 | 896  | 1    | 0.26 | Wound-induced proteinase inhibitor I prepropeptide                                           |
| Les.3085.1.S1_at      | BM413323   | TC22204 | 1611 | 1106 | 417  | 0.69 | 0.26 | Transcribed locus, weakly similar to NP_001042186.1 [Oryza sativa (japonica cultivar-group)] |
| Les.147.1.S1_at       | BG629070   | TC22473 | 102  | 80   | 26   | 0.78 | 0.26 | chlorophyll a/b-binding protein precursor                                                    |
| LesAffx.8708.1.S1_at  | AW033860   | AW03386 | 93   | 56   | 24   | 0.6  | 0.26 | ---                                                                                          |

|                       |            |         |      |      |      |      |      |                                                                                                                                       |
|-----------------------|------------|---------|------|------|------|------|------|---------------------------------------------------------------------------------------------------------------------------------------|
| Les.4345.4.A1_x_at    | BG631293   | TC22725 | 1347 | 771  | 342  | 0.57 | 0.25 | Pathogenesis-related protein P2                                                                                                       |
| Les.3127.3.S1_at      | AW932976   | AW09372 | 2340 | 1740 | 594  | 0.74 | 0.25 | Transcribed locus, weakly similar to XP_001096387.1 similar to serine hydroxymethyltransferase 1 (soluble) isoform 1 [Macaca mulatta] |
| Les.4345.4.A1_at      | BG631293   | TC22725 | 1524 | 926  | 385  | 0.61 | 0.25 | Pathogenesis-related protein P2                                                                                                       |
| Les.1157.1.A1_at      | BG629717   | BG62971 | 123  | 74   | 31   | 0.6  | 0.25 | Transcribed locus                                                                                                                     |
| Les.3718.1.S1_at      | AF384374.1 | TC21922 | 2301 | 1673 | 580  | 0.73 | 0.25 | allene oxide cyclase                                                                                                                  |
| Les.2934.2.S1_at      | BG128445   | TC22376 | 308  | 219  | 77   | 0.71 | 0.25 | Transcribed locus, weakly similar to NP_001046132.1 [Oryza sativa (japonica cultivar-group)]                                          |
| Les.3127.1.S1_a_at    | AW092318   | TC22823 | 2284 | 1582 | 569  | 0.69 | 0.25 | Transcribed locus, weakly similar to XP_001096387.1 similar to serine hydroxymethyltransferase 1 (soluble) isoform 1 [Macaca mulatta] |
| Les.424.1.S1_at       | BG628349   | TC22847 | 1361 | 860  | 337  | 0.63 | 0.25 | Transcribed locus, weakly similar to NP_001041744.1 [Oryza sativa (japonica cultivar-group)]                                          |
| Les.3741.1.S1_at      | AF146691.1 | TC23195 | 1172 | 1401 | 290  | 1.19 | 0.25 | Eli3 protein                                                                                                                          |
| Les.4488.1.S1_at      | BG628643   | TC22827 | 5559 | 4864 | 1342 | 0.87 | 0.24 | threonine deaminase                                                                                                                   |
| Les.1478.1.S1_at      | BG631500   | TC23304 | 1156 | 590  | 278  | 0.51 | 0.24 | Lycopersicon esculentum clone 114252R, mRNA sequence                                                                                  |
| Les.3217.2.S1_at      | CK575028   | TC24389 | 4666 | 4917 | 1113 | 1.05 | 0.24 | Ribulose-1,5-bisphosphate carboxylase, small subunit precursor                                                                        |
| Les.4345.3.S1_x_at    | AI775226   | TC22725 | 2728 | 1497 | 644  | 0.55 | 0.24 | Pathogenesis-related protein P2                                                                                                       |
| Les.424.2.S1_at       | AI776305   | TC22847 | 1341 | 812  | 315  | 0.61 | 0.24 | Transcribed locus, weakly similar to NP_001041744.1 [Oryza sativa (japonica cultivar-group)]                                          |
| Les.3266.2.S1_at      | BI931445   | TC23669 | 304  | 309  | 71   | 1.01 | 0.23 | Transcribed locus, moderately similar to NP_001047794.1 [Oryza sativa (japonica cultivar-group)]                                      |
| Les.4508.1.S1_s_at    | AI780576   | BG12438 | 1823 | 1211 | 424  | 0.66 | 0.23 | Lycopersicon esculentum clone 135719R, mRNA sequence                                                                                  |
| Les.4988.1.S1_at      | BT013056.1 | TC22946 | 2355 | 2536 | 541  | 1.08 | 0.23 | Lycopersicon esculentum clone 114312R, mRNA sequence                                                                                  |
| Les.4508.2.S1_s_at    | AW623685   | TC23882 | 2441 | 1618 | 553  | 0.66 | 0.23 | Lycopersicon esculentum clone 135719R, mRNA sequence                                                                                  |
| Les.2964.1.A1_at      | BG627802   | TC23599 | 1328 | 770  | 294  | 0.58 | 0.22 | Transcribed locus, weakly similar to NP_001042324.1 [Oryza sativa (japonica cultivar-group)]                                          |
| Les.3286.1.S1_at      | BT013249.1 | TC23425 | 4004 | 4169 | 883  | 1.04 | 0.22 | Lycopersicon esculentum inducible plastid-lipid associated protein (CHRD)                                                             |
| Les.810.1.S1_at       | BG627575   | TC22972 | 549  | 335  | 118  | 0.61 | 0.21 | Lycopersicon esculentum clone 133744F, mRNA sequence                                                                                  |
| Les.4617.1.S1_at      | BT014212.1 | TC23312 | 1506 | 827  | 319  | 0.55 | 0.21 | Lycopersicon esculentum clone 133389F, mRNA sequence                                                                                  |
| Les.2971.1.S1_at      | AI781668   | TC23191 | 1510 | 1327 | 314  | 0.88 | 0.21 | Wound-induced proteinase inhibitor I prepropeptide                                                                                    |
| Les.3649.1.S1_at      | AJ785484   | TC23379 | 7426 | 4329 | 1500 | 0.58 | 0.2  | chalcone synthase                                                                                                                     |
| LesAffx.37212.1.S1_at | AI491145   | TC23069 | 732  | 462  | 147  | 0.63 | 0.2  | ---                                                                                                                                   |
| Les.3741.1.A1_at      | AF146691.1 | TC23195 | 572  | 591  | 113  | 1.03 | 0.2  | Eli3 protein                                                                                                                          |
| LesAffx.10650.1.S1_at | AW036686   | TC23252 | 1690 | 1345 | 329  | 0.8  | 0.19 | CDNA, clone: FC20BC08, HTC in fruit                                                                                                   |
| LesAffx.71535.1.S1_at | AW040299   | TC23102 | 218  | 172  | 42   | 0.79 | 0.19 | Transcribed locus, weakly similar to NP_001049750.1 [Oryza sativa (japonica cultivar-group)]                                          |

|                       |            |         |      |      |     |      |      |                                                                                                                           |
|-----------------------|------------|---------|------|------|-----|------|------|---------------------------------------------------------------------------------------------------------------------------|
| Les.4345.1.S1_at      | BG629758   | TC23353 | 4517 | 2395 | 877 | 0.53 | 0.19 | Lycopersicon esculentum clone 133385R, mRNA sequence                                                                      |
| Les.327.1.S1_at       | BT014378.1 | TC22961 | 3480 | 2789 | 671 | 0.8  | 0.19 | Lycopersicon esculentum clone 133667F, mRNA sequence                                                                      |
| Les.4345.2.A1_x_at    | AI781554   | TC23670 | 2872 | 1495 | 552 | 0.52 | 0.19 | Pathogenesis-related protein P2                                                                                           |
| Les.4345.2.A1_a_at    | AI781554   | TC23670 | 2345 | 1211 | 433 | 0.52 | 0.18 | Lycopersicon esculentum clone 133385R, mRNA sequence                                                                      |
| Les.3376.1.A1_at      | BG630058   | TC21732 | 2814 | 2048 | 501 | 0.73 | 0.18 | CONSTANS interacting protein 1                                                                                            |
| Les.4181.1.A1_at      | BG630015   | TC22910 | 158  | 81   | 27  | 0.51 | 0.17 | Transcribed locus                                                                                                         |
| Les.4522.1.S1_at      | AY497477.1 | TC23773 | 946  | 741  | 160 | 0.78 | 0.17 | xyloglucan endotransglucosylase-hydrolase XTH6                                                                            |
| Les.3070.2.A1_at      | BG629293   | TC22028 | 3090 | 2455 | 511 | 0.79 | 0.17 | Transcribed locus, weakly similar to NP_001042269.1 [Oryza sativa (japonica cultivar-group)]                              |
| Les.3070.1.S1_at      | BG126941   | TC22028 | 2095 | 1556 | 342 | 0.74 | 0.16 | Transcribed locus, weakly similar to NP_001042269.1 [Oryza sativa (japonica cultivar-group)]                              |
| Les.4258.1.A1_at      | BG626687   | TC23571 | 880  | 489  | 143 | 0.56 | 0.16 | Transcribed locus, weakly similar to XP_001104139.1 similar to aarF domain containing kinase 1 isoform 2 [Macaca mulatta] |
| Les.3376.2.S1_at      | AW932459   | TC21732 | 1306 | 828  | 199 | 0.63 | 0.15 | CONSTANS interacting protein 1                                                                                            |
| LesAffx.37212.1.A1_at | AI491145   | TC23069 | 203  | 124  | 30  | 0.61 | 0.15 | ---                                                                                                                       |
| Les.84.1.S1_at        | U50151.1   | TC21723 | 3457 | 3083 | 506 | 0.89 | 0.15 | leucine aminopeptidase                                                                                                    |
| Les.4281.2.S1_at      | BI926015   | DB69892 | 542  | 407  | 76  | 0.75 | 0.14 | Transcribed locus, weakly similar to XP_001110787.1 ectonucleoside triphosphate diphosphohydrolase 3 [Macaca mulatta]     |
| LesAffx.1.1.S1_at     | AY656838.1 | TC21732 | 2424 | 1274 | 332 | 0.53 | 0.14 | arginase 2                                                                                                                |
| Les.4923.1.S1_at      | BT012912.1 | TC22925 | 697  | 810  | 93  | 1.16 | 0.13 | Lycopersicon esculentum clone 114030R, mRNA sequence                                                                      |
| LesAffx.29797.1.S1_at | AJ784483   | TC23412 | 409  | 213  | 54  | 0.52 | 0.13 | Transcribed locus, weakly similar to NP_001042863.1 [Oryza sativa (japonica cultivar-group)]                              |
| Les.2504.1.A1_at      | BG628687   | TC23404 | 1244 | 808  | 164 | 0.65 | 0.13 | Transcribed locus, weakly similar to NP_001043990.1 [Oryza sativa (japonica cultivar-group)]                              |
| LesAffx.10091.1.S1_at | AI487223   | TC23911 | 478  | 346  | 63  | 0.72 | 0.13 | Transcribed locus, weakly similar to NP_173851.1 [Arabidopsis thaliana]                                                   |
| LesAffx.56221.1.S1_at | AI894713   | TC24290 | 159  | 130  | 21  | 0.82 | 0.13 | Transcribed locus, weakly similar to NP_001042068.1 [Oryza sativa (japonica cultivar-group)]                              |
| Les.4281.3.S1_at      | AI771846   | TC21921 | 105  | 82   | 13  | 0.78 | 0.13 | Transcribed locus, weakly similar to XP_001110787.1 ectonucleoside triphosphate diphosphohydrolase 3 [Macaca mulatta]     |
| LesAffx.69609.1.S1_at | AW929283   | TC23404 | 563  | 308  | 71  | 0.55 | 0.13 | Transcribed locus, weakly similar to NP_001043990.1 [Oryza sativa (japonica cultivar-group)]                              |
| Les.4281.1.A1_at      | BG626715   | TC21921 | 943  | 681  | 118 | 0.72 | 0.12 | Transcribed locus, weakly similar to XP_001110787.1 ectonucleoside triphosphate diphosphohydrolase 3 [Macaca mulatta]     |
| Les.4258.3.S1_at      | BG128812   | TC23571 | 613  | 327  | 75  | 0.53 | 0.12 | Transcribed locus, weakly similar to XP_001104139.1 similar to aarF domain containing kinase 1 isoform 2 [Macaca mulatta] |
| Les.1314.1.S1_at      | BG630759   | TC24293 | 364  | 291  | 44  | 0.8  | 0.12 | Transcribed locus                                                                                                         |

|                       |            |         |      |      |      |     |      |                                                                                                                                                                     |
|-----------------------|------------|---------|------|------|------|-----|------|---------------------------------------------------------------------------------------------------------------------------------------------------------------------|
| LesAffx.4388.1.S1_at  | BI928506   | TC22582 | 1264 | 638  | 655  | 0.5 | 0.52 | Transcribed locus, weakly similar to NP_001048149.1 [Oryza sativa (japonica cultivar-group)]                                                                        |
| LesAffx.63209.1.S1_at | AW092854   | AW09285 | 205  | 103  | 255  | 0.5 | 1.25 | ---                                                                                                                                                                 |
| Les.822.1.A1_at       | BG629497   | BG73456 | 617  | 310  | 594  | 0.5 | 0.96 | Transcribed locus                                                                                                                                                   |
| Les.2638.1.A1_at      | BG628467   | TC24303 | 456  | 229  | 600  | 0.5 | 1.32 | Transcribed locus, weakly similar to NP_001053399.1 [Oryza sativa (japonica cultivar-group)]                                                                        |
| LesAffx.42825.1.S1_at | BI924900   | TC23069 | 583  | 293  | 326  | 0.5 | 0.56 | Transcribed locus, weakly similar to NP_001046792.1 [Oryza sativa (japonica cultivar-group)]                                                                        |
| Les.2024.2.S1_at      | BG642995   | AI48435 | 1271 | 638  | 371  | 0.5 | 0.29 | Transcribed locus, weakly similar to XP_001105201.1 fructose-1,6-bisphosphatase 1 isoform 1 [Macaca mulatta]                                                        |
| Les.3530.1.S1_at      | AF258808.1 | TC21713 | 1907 | 957  | 1330 | 0.5 | 0.7  | aldehyde oxidase                                                                                                                                                    |
| Les.4707.1.S1_at      | BT012714.1 | TC23557 | 429  | 215  | 1276 | 0.5 | 2.98 | Lycopersicon esculentum clone 113596R, mRNA sequence                                                                                                                |
| Les.1501.1.A1_at      | BG626168   | TC24040 | 7795 | 3906 | 3769 | 0.5 | 0.48 | Transcribed locus, weakly similar to NP_172635.1 protein [Arabidopsis thaliana]                                                                                     |
| Les.3640.1.S1_at      | X95098.1   | TC21838 | 101  | 51   | 57   | 0.5 | 0.56 | ammonium transporter                                                                                                                                                |
| LesAffx.5781.2.S1_at  | AI776965   | TC23407 | 1429 | 716  | 957  | 0.5 | 0.67 | Transcribed locus, weakly similar to XP_001063508.1 similar to emopamil binding related protein, delta8-delta7 sterol isomerase related protein [Rattus norvegicus] |
| Les.3473.1.S1_at      | AF403444.1 | TC21727 | 8983 | 4495 | 7541 | 0.5 | 0.84 | beta-mannosidase enzyme                                                                                                                                             |
| LesAffx.39.1.S1_at    | CN385433   | TC22335 | 458  | 229  | 1162 | 0.5 | 2.54 | Transcribed locus, weakly similar to NP_001042342.1 [Oryza sativa (japonica cultivar-group)]                                                                        |
| Les.3180.3.A1_at      | BG734557   | TC23323 | 841  | 421  | 266  | 0.5 | 0.32 | Transcribed locus, weakly similar to NP_001048006.1 [Oryza sativa (japonica cultivar-group)]                                                                        |
| Les.4276.1.S1_at      | BG626765   | TC24339 | 5706 | 2854 | 3317 | 0.5 | 0.58 | Lycopersicon esculentum clone 134975R, mRNA sequence                                                                                                                |
| Les.3299.2.A1_s_at    | BG626957   | TC21732 | 1995 | 995  | 231  | 0.5 | 0.12 | arginase 2                                                                                                                                                          |
| Les.2723.2.S1_at      | BI203749   | TC22825 | 402  | 200  | 283  | 0.5 | 0.7  | Transcribed locus, weakly similar to XP_001087943.1 similar to carboxypeptidase, vitellogenic-like isoform 4 [Macaca mulatta]                                       |
| LesAffx.66705.1.S1_at | BI207021   | TC23871 | 1575 | 785  | 1105 | 0.5 | 0.7  | Transcribed locus, moderately similar to NP_197266.1 protein [Arabidopsis thaliana]                                                                                 |
| LesAffx.61653.1.S1_at | BE353914   | TC23734 | 25   | 12   | 22   | 0.5 | 0.88 | Transcribed locus, weakly similar to NP_001046281.1 [Oryza sativa (japonica cultivar-group)]                                                                        |
| LesAffx.45439.1.S1_at | AI772978   | TC23250 | 139  | 69   | 73   | 0.5 | 0.53 | Transcribed locus, moderately similar to NP_568801.2 [Arabidopsis thaliana]                                                                                         |
| LesAffx.21585.1.S1_at | AW929168   | TC21793 | 2682 | 1332 | 1642 | 0.5 | 0.61 | Transcribed locus, moderately similar to NP_001042660.1 [Oryza sativa (japonica cultivar-group)]                                                                    |
| LesAffx.18344.1.S1_at | AI484899   | AI48489 | 147  | 73   | 76   | 0.5 | 0.52 | ---                                                                                                                                                                 |
| LesAffx.3438.1.A1_at  | CN385709   | TC23123 | 1193 | 592  | 966  | 0.5 | 0.81 | Transcribed locus, weakly similar to XP_001092746.1 similar to HTPAP protein [Macaca mulatta]                                                                       |
| Les.5075.1.S1_at      | BT013228.1 | TC21844 | 937  | 465  | 552  | 0.5 | 0.59 | Lycopersicon esculentum clone 134470F, mRNA sequence                                                                                                                |

|                       |            |         |      |      |      |      |      |                                                                                                                                                                                                                                          |
|-----------------------|------------|---------|------|------|------|------|------|------------------------------------------------------------------------------------------------------------------------------------------------------------------------------------------------------------------------------------------|
| LesAffx.52232.1.S1_at | BE450207   | TC22642 | 643  | 319  | 759  | 0.5  | 1.18 | Transcribed locus, moderately similar to NP_001044846.1 [Oryza sativa (japonica cultivar-group)]                                                                                                                                         |
| LesAffx.5781.1.S1_at  | BI204122   | BI93464 | 1937 | 959  | 1243 | 0.5  | 0.64 | Transcribed locus, weakly similar to XP_001063508.1 similar to emopamil binding related protein, delta8-delta7 sterol isomerase related protein [Rattus norvegicus]                                                                      |
| Les.4703.1.S1_at      | BT012803.1 | TC23339 | 3749 | 1854 | 3020 | 0.49 | 0.81 | Lycopersicon esculentum clone 113819F, mRNA sequence                                                                                                                                                                                     |
| LesAffx.66486.1.S1_at | BI209424   | BI20942 | 1052 | 519  | 645  | 0.49 | 0.61 | ---                                                                                                                                                                                                                                      |
| LesAffx.6338.1.A1_at  | AW929824   | TC23173 | 3083 | 1522 | 1692 | 0.49 | 0.55 | Transcribed locus, weakly similar to NP_001042207.1 [Oryza sativa (japonica cultivar-group)]                                                                                                                                             |
| Les.4060.1.S1_at      | BT014090.1 | TC24190 | 2597 | 1280 | 1693 | 0.49 | 0.65 | Lycopersicon esculentum (DB217) meloidogyne-induced giant cell protein mRNA, 3' end                                                                                                                                                      |
| Les.753.1.A1_at       | BG627285   | BG62728 | 440  | 217  | 388  | 0.49 | 0.88 | Transcribed locus                                                                                                                                                                                                                        |
| LesAffx.65478.1.S1_at | AW441264   | TC22848 | 650  | 320  | 489  | 0.49 | 0.75 | Transcribed locus, weakly similar to XP_001108618.1 similar to Mortality factor 4-like protein 1 (MORF-related gene 15 protein) (Transcription factor-like protein MRG15) (Testis-expressed gene 189 protein) isoform 2 [Macaca mulatta] |
| LesAffx.55861.1.S1_at | AW932065   | TC22128 | 2785 | 1372 | 1975 | 0.49 | 0.71 | Transcribed locus, weakly similar to NP_001042276.1 [Oryza sativa (japonica cultivar-group)]                                                                                                                                             |
| Les.5579.1.S1_at      | BT014190.1 | TC23962 | 586  | 288  | 887  | 0.49 | 1.52 | Lycopersicon esculentum clone 133367R, mRNA sequence                                                                                                                                                                                     |
| Les.3214.1.S1_at      | BG631018   | TC21991 | 784  | 386  | 344  | 0.49 | 0.44 | Transcribed locus, strongly similar to NP_001064609.1 [Oryza sativa (japonica cultivar-group)]                                                                                                                                           |
| Les.4492.3.S1_at      | CK715138   | TC22356 | 1322 | 650  | 502  | 0.49 | 0.38 | Transcribed locus, weakly similar to XP_001111095.1 aldolase B isoform 5 [Macaca mulatta]                                                                                                                                                |
| Les.4311.1.S1_at      | AY269087.1 | TC24251 | 3552 | 1746 | 2132 | 0.49 | 0.6  | GAI-like protein                                                                                                                                                                                                                         |
| LesAffx.71442.2.S1_at | BG125039   | TC22165 | 1098 | 539  | 722  | 0.49 | 0.66 | Transcribed locus, moderately similar to NP_001043594.1 [Oryza sativa (japonica cultivar-group)]                                                                                                                                         |
| Les.2110.1.A1_at      | BG631670   | TC23758 | 630  | 309  | 338  | 0.49 | 0.54 | Transcribed locus, weakly similar to NP_001045247.1 [Oryza sativa (japonica cultivar-group)]                                                                                                                                             |
| Les.1997.1.S1_at      | BE354113   | TC22008 | 986  | 484  | 429  | 0.49 | 0.44 | Transcribed locus, weakly similar to NP_001737.1 precursor [Homo sapiens]                                                                                                                                                                |
| Les.2453.1.S1_at      | BG735536   | TC23082 | 500  | 246  | 543  | 0.49 | 1.09 | Transcribed locus, weakly similar to NP_001050364.1 [Oryza sativa (japonica cultivar-group)]                                                                                                                                             |
| Les.3290.3.S1_at      | BI933219   | BG12945 | 1200 | 589  | 436  | 0.49 | 0.36 | Transcribed locus, weakly similar to XP_001093616.1 glutamic-pyruvate transaminase (alanine aminotransferase) isoform 1 [Macaca mulatta]                                                                                                 |
| LesAffx.37636.1.S1_at | CN384813   | EG55389 | 44   | 21   | 35   | 0.49 | 0.81 | ---                                                                                                                                                                                                                                      |
| Les.5382.1.S1_at      | BT013811.1 | AI48888 | 2430 | 1192 | 1988 | 0.49 | 0.82 | Lycopersicon esculentum clone 132732F, mRNA sequence                                                                                                                                                                                     |
| Les.4753.1.S1_at      | BT013114.1 | TC22177 | 1323 | 649  | 1047 | 0.49 | 0.79 | Lycopersicon esculentum clone 114401R, mRNA sequence                                                                                                                                                                                     |
| Les.3297.2.S1_at      | AI773077   | TC23571 | 603  | 295  | 138  | 0.49 | 0.23 | Transcribed locus, weakly similar to NP_001043493.1 [Oryza sativa (japonica cultivar-group)]                                                                                                                                             |

|                       |            |         |      |      |      |      |      |                                                                                                                                                                                  |
|-----------------------|------------|---------|------|------|------|------|------|----------------------------------------------------------------------------------------------------------------------------------------------------------------------------------|
| LesAffx.65695.1.A1_at | AA824728   | TC23451 | 758  | 371  | 398  | 0.49 | 0.53 | Transcribed locus, moderately similar to NP_001047304.1 [Oryza sativa (japonica cultivar-group)]                                                                                 |
| LesAffx.55043.1.S1_at | BI927121   | TC22818 | 2049 | 1002 | 1296 | 0.49 | 0.63 | Transcribed locus, moderately similar to NP_001047304.1 [Oryza sativa (japonica cultivar-group)]                                                                                 |
| Les.2327.1.A1_at      | BG734815   | TC24413 | 273  | 133  | 158  | 0.49 | 0.58 | Transcribed locus                                                                                                                                                                |
| Les.3961.1.S1_at      | AY157065.1 | TC23373 | 1215 | 594  | 803  | 0.49 | 0.66 | WRKY transcription factor IId-6                                                                                                                                                  |
| Les.3426.1.A1_at      | BG628304   | GO37605 | 965  | 472  | 1045 | 0.49 | 1.08 | Transcribed locus                                                                                                                                                                |
| Les.5780.1.S1_at      | BT014552.1 | TC22185 | 1295 | 632  | 643  | 0.49 | 0.5  | Lycopersicon esculentum clone 133974R, mRNA sequence                                                                                                                             |
| LesAffx.70441.2.S1_at | BF052016   | TC22588 | 1577 | 769  | 965  | 0.49 | 0.61 | Transcribed locus, weakly similar to XP_001057078.1 similar to Interleukin-1 receptor-associated kinase 1 (IRAK-1) (IRAK) (Pelle-like protein kinase) (mPLK) [Rattus norvegicus] |
| Les.107.1.S1_at       | AJ243452.1 | TC22276 | 248  | 121  | 175  | 0.49 | 0.71 | cyclin A2                                                                                                                                                                        |
| LesAffx.1689.1.S1_at  | BE436059   | TC24218 | 129  | 63   | 99   | 0.49 | 0.77 | ---                                                                                                                                                                              |
| Les.5226.1.S1_at      | BT013530.1 |         | 1008 | 488  | 562  | 0.48 | 0.56 | Lycopersicon esculentum clone 132248F, mRNA sequence                                                                                                                             |
| Les.4412.1.A1_at      | BG627732   | TC23503 | 592  | 287  | 232  | 0.48 | 0.39 | Transcribed locus, weakly similar to NP_001042986.1 [Oryza sativa (japonica cultivar-group)]                                                                                     |
| Les.4300.3.S1_at      | BI932691   | TC21888 | 7764 | 3759 | 3570 | 0.48 | 0.46 | Transcribed locus, weakly similar to NP_001043243.1 [Oryza sativa (japonica cultivar-group)]                                                                                     |
| LesAffx.71000.1.S1_at | BF096685   | TC23035 | 1178 | 568  | 774  | 0.48 | 0.66 | Transcribed locus, moderately similar to NP_001067733.1 [Oryza sativa (japonica cultivar-group)]                                                                                 |
| Les.3962.1.A1_at      | BG630092   | TC24180 | 1285 | 619  | 817  | 0.48 | 0.64 | WRKY transcription factor IId-3                                                                                                                                                  |
| Les.4953.1.S1_at      | BT012976.1 | TC23170 | 434  | 209  | 139  | 0.48 | 0.32 | Lycopersicon esculentum clone 114187R, mRNA sequence                                                                                                                             |
| Les.3322.2.S1_at      | AW091831   | TC22662 | 794  | 382  | 262  | 0.48 | 0.33 | Transcribed locus, moderately similar to NP_001047599.1 [Oryza sativa (japonica cultivar-group)]                                                                                 |
| LesAffx.16672.1.A1_at | AW625117   | TC23550 | 216  | 104  | 108  | 0.48 | 0.5  | Transcribed locus, weakly similar to NP_001055520.1 [Oryza sativa (japonica cultivar-group)]                                                                                     |
| Les.34.1.S1_at        | AF050496.1 | TC21713 | 497  | 238  | 189  | 0.48 | 0.38 | Ca <sup>2+</sup> -ATPase                                                                                                                                                         |
| Les.5253.1.S1_at      | BT013571.1 | TC22485 | 1254 | 600  | 767  | 0.48 | 0.61 | Lycopersicon esculentum clone 132309R, mRNA sequence                                                                                                                             |
| Les.3479.1.S1_at      | AF347614.1 | TC22134 | 1492 | 714  | 654  | 0.48 | 0.44 | sulfate transporter 2                                                                                                                                                            |
| Les.1079.3.A1_at      | BG626088   | GO37592 | 61   | 29   | 30   | 0.48 | 0.48 | Transcribed locus, weakly similar to NP_001043162.1 [Oryza sativa (japonica cultivar-group)]                                                                                     |
| Les.1163.1.A1_at      | BG629779   | TC24214 | 999  | 478  | 523  | 0.48 | 0.52 | Transcribed locus, moderately similar to NP_191007.1 factor [Arabidopsis                                                                                                         |
| LesAffx.53506.1.S1_at | BI206456   | TC22555 | 330  | 158  | 366  | 0.48 | 1.11 | Transcribed locus, weakly similar to XP_001113078.1 similar to protein tyrosine phosphatase-like (proline instead of catalytic arginine), member b [Macaca mulatta]              |
| Les.842.2.S1_at       | AI896617   | TC23080 | 2442 | 1167 | 924  | 0.48 | 0.38 | Transcribed locus, weakly similar to NP_001042177.1 [Oryza sativa (japonica cultivar-group)]                                                                                     |

|                       |            |         |       |      |      |      |      |                                                                                                                                          |
|-----------------------|------------|---------|-------|------|------|------|------|------------------------------------------------------------------------------------------------------------------------------------------|
| Les.1857.1.A1_at      | BG629691   | TC23786 | 47    | 22   | 35   | 0.48 | 0.75 | Transcribed locus, weakly similar to NP_001060003.1 [Oryza sativa (japonica cultivar-group)]                                             |
| Les.5864.1.S1_at      | U20596.1   | TC23921 | 5218  | 2482 | 1688 | 0.48 | 0.32 | hypothetical LOC544002                                                                                                                   |
| LesAffx.67395.1.A1_at | AI490749   | TC23607 | 292   | 139  | 154  | 0.47 | 0.53 | Transcribed locus, weakly similar to NP_001055520.1 [Oryza sativa (japonica cultivar-group)]                                             |
| Les.3290.1.S1_at      | BG123573   | TC22022 | 1043  | 495  | 393  | 0.47 | 0.38 | Transcribed locus, weakly similar to XP_001093616.1 glutamic-pyruvate transaminase (alanine aminotransferase) isoform 1 [Macaca mulatta] |
| Les.928.1.S1_at       | BG735170   | TC22279 | 2159  | 1024 | 2526 | 0.47 | 1.17 | Lycopersicon esculentum clone 132994F, mRNA sequence                                                                                     |
| Les.355.1.A1_at       | BG627591   | TC23931 | 663   | 315  | 310  | 0.47 | 0.47 | Transcribed locus                                                                                                                        |
| LesAffx.286.2.S1_a_at | BG629460   | BP89354 | 11575 | 5482 | 5507 | 0.47 | 0.48 | similar to aquaporin                                                                                                                     |
| Les.5316.1.S1_at      | BT013701.1 | TC24245 | 808   | 382  | 474  | 0.47 | 0.59 | Lycopersicon esculentum clone 132543F, mRNA sequence                                                                                     |
| Les.5271.1.S1_s_at    | BT013613.1 | TC23091 | 247   | 117  | 124  | 0.47 | 0.5  | HD-ZIP protein                                                                                                                           |
| Les.2659.2.A1_at      | BG626591   | TC23900 | 298   | 141  | 279  | 0.47 | 0.94 | Transcribed locus, weakly similar to NP_001053382.1 [Oryza sativa (japonica cultivar-group)]                                             |
| Les.24.1.S1_at        | AF191823.1 | TC21735 | 201   | 95   | 30   | 0.47 | 0.15 | alpha-galactosidase                                                                                                                      |
| LesAffx.30938.1.A1_at | AJ785088   | TC22113 | 188   | 89   | 56   | 0.47 | 0.3  | Transcribed locus, weakly similar to NP_001042177.1 [Oryza sativa (japonica cultivar-group)]                                             |
| Les.5263.1.S1_at      | BT013600.1 | TC22756 | 143   | 68   | 89   | 0.47 | 0.62 | Lycopersicon esculentum clone 132364F, mRNA sequence                                                                                     |
| LesAffx.16672.1.S1_at | AW625117   | TC23550 | 870   | 411  | 594  | 0.47 | 0.68 | Transcribed locus, weakly similar to NP_001055520.1 [Oryza sativa (japonica cultivar-group)]                                             |
| Les.5198.1.A1_at      | BT013491.1 |         | 154   | 73   | 99   | 0.47 | 0.64 | Lycopersicon esculentum clone 132175F, mRNA sequence                                                                                     |
| Les.2924.1.S1_at      | BT012789.1 | TC23389 | 1642  | 773  | 1092 | 0.47 | 0.66 | Lycopersicon esculentum clone 113783F, mRNA sequence                                                                                     |
| Les.744.1.S1_at       | BT013096.1 | TC23212 | 1489  | 700  | 1024 | 0.47 | 0.69 | Lycopersicon esculentum clone 114362R, mRNA sequence                                                                                     |
| LesAffx.66165.1.S1_at | AW649540   | TC22272 | 1121  | 525  | 604  | 0.47 | 0.54 | Transcribed locus, weakly similar to XP_001105944.1 similar to WW-domain oxidoreductase [Macaca mulatta]                                 |
| LesAffx.30937.1.S1_at | AJ785090   |         | 1951  | 914  | 997  | 0.47 | 0.51 | ---                                                                                                                                      |
| Les.19.1.S1_at        | BG626377   | TC24377 | 3622  | 1692 | 1355 | 0.47 | 0.37 | Transcribed locus, moderately similar to NP_001042358.1 [Oryza sativa (japonica cultivar-group)]                                         |
| LesAffx.1959.2.S1_at  | AW216683   | TC23208 | 2286  | 1066 | 1287 | 0.47 | 0.56 | Transcribed locus, weakly similar to XP_001120892.1 similar to CG14214-PA [Apis mellifera]                                               |
| Les.1977.1.S1_at      | BG630657   | TC22750 | 2032  | 947  | 789  | 0.47 | 0.39 | Transcribed locus, weakly similar to XP_001097638.1 similar to CG32699-PA [Macaca mulatta]                                               |
| Les.4597.1.S1_at      | BT012921.1 |         | 267   | 124  | 145  | 0.47 | 0.54 | Lycopersicon esculentum clone 114084R, mRNA sequence                                                                                     |
| LesAffx.53517.1.S1_at | AI773309   | TC23424 | 3300  | 1533 | 2177 | 0.46 | 0.66 | Transcribed locus, weakly similar to NP_001042342.1 [Oryza sativa (japonica cultivar-group)]                                             |

|                       |            |         |      |      |      |      |      |                                                                                                  |
|-----------------------|------------|---------|------|------|------|------|------|--------------------------------------------------------------------------------------------------|
| LesAffx.26471.1.S1_at | BG126065   | TC22883 | 947  | 440  | 718  | 0.46 | 0.76 | Transcribed locus, weakly similar to NP_001054088.1 [Oryza sativa (japonica cultivar-group)]     |
| Les.3748.1.A1_at      | AB023388.1 | TC22967 | 411  | 191  | 168  | 0.46 | 0.41 | acid phosphatase                                                                                 |
| LesAffx.41816.1.S1_at | AW649474   | TC22094 | 232  | 107  | 170  | 0.46 | 0.73 | Transcribed locus, weakly similar to XP_001102886.1 hexosaminidase B isoform 1 [Macaca mulatta]  |
| Les.4008.1.S1_a_at    | BG630151   | TC21741 | 6129 | 2843 | 4048 | 0.46 | 0.66 | xyloglucan endotransglycosylase/hydrolase 16 protein                                             |
| Les.5255.1.S1_at      | BT013579.1 | BP87874 | 1114 | 516  | 630  | 0.46 | 0.57 | Lycopersicon esculentum clone 132324R, mRNA sequence                                             |
| LesAffx.10346.1.S1_at | CK715067   | TC22642 | 616  | 285  | 329  | 0.46 | 0.53 | Transcribed locus, weakly similar to NP_001053447.1 [Oryza sativa (japonica cultivar-group)]     |
| Les.109.1.S1_at       | AF154424.1 | TC22392 | 2994 | 1386 | 2765 | 0.46 | 0.92 | TBG6 protein                                                                                     |
| Les.5114.1.S1_at      | BT013305.1 | TC24276 | 109  | 51   | 49   | 0.46 | 0.45 | Lycopersicon esculentum clone 134950R, mRNA sequence                                             |
| Les.2305.1.S1_at      | AW622769   | TC22654 | 2692 | 1243 | 1343 | 0.46 | 0.5  | Transcribed locus, weakly similar to NP_001044221.1 [Oryza sativa (japonica cultivar-group)]     |
| Les.1997.3.A1_at      | BG630825   | TC24117 | 806  | 372  | 242  | 0.46 | 0.3  | Transcribed locus, weakly similar to NP_001737.1 precursor [Homo sapiens]                        |
| Les.3175.1.S1_at      | BG626608   | TC23958 | 3439 | 1585 | 1408 | 0.46 | 0.41 | Lycopersicon esculentum clone 132976F, mRNA sequence                                             |
| Les.3983.1.S1_at      | U20591.1   | TC23477 | 213  | 98   | 54   | 0.46 | 0.25 | flower-specific gamma-thionin-like protein/acidic protein precursor                              |
| Les.5515.1.S1_at      | BT014060.1 |         | 1807 | 831  | 1067 | 0.46 | 0.59 | Lycopersicon esculentum clone 133158F, mRNA sequence                                             |
| Les.5601.1.S1_at      | BT014233.1 | TC22079 | 472  | 217  | 156  | 0.46 | 0.33 | Lycopersicon esculentum clone 133432F, mRNA sequence                                             |
| Les.61.1.S1_at        | Y10403.1   | TC22152 | 1715 | 787  | 779  | 0.46 | 0.45 | RNA-directed RNA polymerase                                                                      |
| Les.3967.1.S1_at      | AY157317.2 | TC22150 | 1725 | 790  | 556  | 0.46 | 0.32 | omega-3 fatty acid desaturase                                                                    |
| LesAffx.65695.2.S1_at | AI484733   | TC23451 | 1906 | 873  | 1205 | 0.46 | 0.63 | Transcribed locus, moderately similar to NP_001047304.1 [Oryza sativa (japonica cultivar-group)] |
| Les.266.1.S1_a_at     | M84801.1   | AI48785 | 68   | 31   | 23   | 0.46 | 0.33 | prosystemin                                                                                      |
|                       |            |         | 35   | 16   | 31   | 0.46 | 0.87 | ---                                                                                              |
| LesAffx.69601.2.S1_at | AW429229   | TC21962 | 356  | 163  | 244  | 0.46 | 0.69 | Transcribed locus, weakly similar to NP_001048441.1 [Oryza sativa (japonica cultivar-group)]     |
| Les.2415.2.S1_at      | BE431455   | TC23842 | 1478 | 674  | 396  | 0.46 | 0.27 | Transcribed locus, moderately similar to NP_001061906.1 [Oryza sativa (japonica cultivar-group)] |
| LesAffx.65060.1.A1_at | CK716180   | DV10448 | 1701 | 775  | 729  | 0.46 | 0.43 | ---                                                                                              |
| Les.4857.2.S1_at      | BT013315.1 | TC24509 | 1355 | 617  | 1157 | 0.46 | 0.85 | Lycopersicon esculentum clone 113755R, mRNA sequence                                             |
| Les.842.1.S1_at       | BI931450   | TC23080 | 2736 | 1246 | 881  | 0.46 | 0.32 | Transcribed locus, weakly similar to NP_001042177.1 [Oryza sativa (japonica cultivar-group)]     |
| Les.4520.1.S1_at      | BT013422.1 | GO37596 | 5428 | 2470 | 2743 | 0.46 | 0.51 | Lycopersicon esculentum clone 132061R, mRNA sequence                                             |
| LesAffx.64675.2.A1_at | AJ784544   | TC21939 | 434  | 198  | 205  | 0.45 | 0.47 | Transcribed locus, weakly similar to NP_001052406.1 [Oryza sativa (japonica cultivar-group)]     |
| Les.5282.1.S1_at      | BT013633.1 | BE46052 | 203  | 92   | 114  | 0.45 | 0.56 | Lycopersicon esculentum clone 132435R, mRNA sequence                                             |



|                       |            |         |      |      |      |      |      |                                                                                                                               |
|-----------------------|------------|---------|------|------|------|------|------|-------------------------------------------------------------------------------------------------------------------------------|
| Les.1784.2.A1_at      | BG628995   | TC24140 | 176  | 80   | 62   | 0.45 | 0.35 | Transcribed locus, weakly similar to XP_001118335.1 similar to intestinal facilitative glucose transporter 7 [Macaca mulatta] |
| Les.5318.1.S1_at      | BT013703.1 | TC24128 | 3932 | 1779 | 1064 | 0.45 | 0.27 | Lycopersicon esculentum clone 132545F, mRNA sequence                                                                          |
| LesAffx.34276.1.S1_at | BE433400   | TC22379 | 262  | 118  | 68   | 0.45 | 0.26 | Transcribed locus, weakly similar to NP_001043674.1 [Oryza sativa (japonica cultivar-group)]                                  |
| LesAffx.9975.1.A1_at  | AI487405   | AI48740 | 63   | 28   | 33   | 0.45 | 0.52 | ---                                                                                                                           |
| LesAffx.30807.1.S1_at | AW624957   | AW62495 | 1172 | 529  | 1035 | 0.45 | 0.88 | Transcribed locus, weakly similar to XP_001116629.1 similar to fatty acid desaturase 2 isoform 2 [Macaca mulatta]             |
| LesAffx.69295.1.S1_at | BI933687   | TC23040 | 243  | 109  | 51   | 0.45 | 0.21 | Transcribed locus, weakly similar to NP_001045746.1 [Oryza sativa (japonica cultivar-group)]                                  |
| Les.2933.1.S1_at      | BT012764.1 | TC23454 | 2013 | 907  | 502  | 0.45 | 0.25 | Lycopersicon esculentum clone 113710R, mRNA sequence                                                                          |
| Les.3198.1.S1_at      | L13654.1   | TC22193 | 49   | 22   | 30   | 0.45 | 0.62 | Lycopersicon esculentum peroxidase (TPX1)                                                                                     |
| Les.2044.2.S1_at      | AW443278   | TC23957 | 2460 | 1107 | 1134 | 0.45 | 0.46 | Transcribed locus, weakly similar to NP_001043713.1 [Oryza sativa (japonica cultivar-group)]                                  |
| Les.3279.3.S1_at      | BE450546   | TC21783 | 1995 | 897  | 841  | 0.45 | 0.42 | Transcribed locus, weakly similar to NP_001042478.1 [Oryza sativa (japonica cultivar-group)]                                  |
| Les.5160.1.S1_at      | BT013410.1 | TC23771 | 886  | 399  | 788  | 0.45 | 0.89 | Lycopersicon esculentum clone 132046F, mRNA sequence                                                                          |
| LesAffx.54132.1.S1_at | BM535606   | TC23181 | 984  | 442  | 602  | 0.45 | 0.61 | Transcribed locus, weakly similar to XP_001110795.1 similar to WD and tetratricopeptide repeats 1 [Macaca mulatta]            |
| LesAffx.70136.2.S1_at | AI899680   | TC23538 | 488  | 219  | 102  | 0.45 | 0.21 | Transcribed locus, weakly similar to NP_001044898.1 [Oryza sativa (japonica cultivar-group)]                                  |
| LesAffx.51641.1.S1_at | BM535284   | TC23056 | 116  | 52   | 60   | 0.45 | 0.52 | ---                                                                                                                           |
| LesAffx.65695.2.A1_at | AI484733   | TC23451 | 418  | 188  | 202  | 0.45 | 0.48 | Transcribed locus, moderately similar to NP_001047304.1 [Oryza sativa (japonica cultivar-group)]                              |
| Les.21.1.S1_at        | AJ006377.1 | TC23436 | 578  | 259  | 213  | 0.45 | 0.37 | subtilisin-like protease                                                                                                      |
| Les.3054.1.S1_at      | AI773693   | TC23429 | 2558 | 1146 | 395  | 0.45 | 0.15 | Lycopersicon esculentum clone 135718R, mRNA sequence                                                                          |
| LesAffx.3570.4.S1_at  | AW624180   | TC22612 | 1001 | 447  | 569  | 0.45 | 0.57 | Ribosomal protein L2                                                                                                          |
| Les.2415.3.A1_at      | BG735370   | TC23842 | 2115 | 943  | 527  | 0.45 | 0.25 | Transcribed locus, moderately similar to NP_001061906.1 [Oryza sativa (japonica cultivar-group)]                              |
| LesAffx.56.6.S1_at    | BM536076   | TC23980 | 92   | 41   | 115  | 0.45 | 1.25 | Transcribed locus, weakly similar to NP_004311.1 Ca++ transporting, fast twitch 1 isoform b [Homo sapiens]                    |
| LesAffx.32563.1.S1_at | AI778206   | TC22260 | 695  | 309  | 633  | 0.45 | 0.91 | Transcribed locus, weakly similar to NP_001053075.1 [Oryza sativa (japonica cultivar-group)]                                  |
| Les.326.1.A1_at       | BG630477   | TC23669 | 847  | 377  | 995  | 0.45 | 1.17 | Transcribed locus                                                                                                             |
| LesAffx.52329.1.S1_at | BI927716   | BI92771 | 475  | 211  | 200  | 0.44 | 0.42 | ---                                                                                                                           |

|                         |            |         |      |      |      |      |      |                                                                                                                 |
|-------------------------|------------|---------|------|------|------|------|------|-----------------------------------------------------------------------------------------------------------------|
| LesAffx.31451.1.S1_at   | BM409478   | TC22107 | 234  | 104  | 108  | 0.44 | 0.46 | Transcribed locus, weakly similar to NP_001048751.1 [Oryza sativa (japonica cultivar-group)]                    |
| Les.4334.2.S1_at        | BI928683   | TC22597 | 705  | 313  | 331  | 0.44 | 0.47 | Transcribed locus, weakly similar to XP_001109838.1 ribulose-5-phosphate-3-epimerase isoform 5 [Macaca mulatta] |
| LesAffx.64675.1.S1_a_at | CN385903   | TC21939 | 844  | 374  | 477  | 0.44 | 0.57 | Transcribed locus, weakly similar to NP_001052406.1 [Oryza sativa (japonica cultivar-group)]                    |
| Les.842.2.S1_a_at       | AI896617   | TC23080 | 3161 | 1402 | 1023 | 0.44 | 0.32 | Transcribed locus, weakly similar to NP_001042177.1 [Oryza sativa (japonica cultivar-group)]                    |
| LesAffx.50610.1.S1_at   | AI775987   | TC24497 | 380  | 168  | 176  | 0.44 | 0.46 | ---                                                                                                             |
| Les.4825.1.S1_at        | BT012681.1 | TC22418 | 761  | 336  | 411  | 0.44 | 0.54 | Lycopersicon esculentum clone 113528F, mRNA sequence                                                            |
| Les.3279.1.A1_at        | BG734827   | TC22261 | 1997 | 883  | 1043 | 0.44 | 0.52 | Transcribed locus, weakly similar to NP_001042478.1 [Oryza sativa (japonica cultivar-group)]                    |
| LesAffx.69601.1.S1_at   | AW030431   | TC21962 | 315  | 139  | 205  | 0.44 | 0.65 | Transcribed locus, weakly similar to NP_001048441.1 [Oryza sativa (japonica cultivar-group)]                    |
| Les.3297.1.S1_at        | BG630303   | TC21776 | 2131 | 941  | 464  | 0.44 | 0.22 | Transcribed locus, weakly similar to NP_001043493.1 [Oryza sativa (japonica cultivar-group)]                    |
| LesAffx.10346.1.A1_at   | CK715067   | TC22642 | 1573 | 694  | 978  | 0.44 | 0.62 | Transcribed locus, weakly similar to NP_001053447.1 [Oryza sativa (japonica cultivar-group)]                    |
| Les.4982.1.S1_at        | BT013044.1 | AW62120 | 132  | 58   | 56   | 0.44 | 0.42 | Lycopersicon esculentum clone 114294R, mRNA sequence                                                            |
| Les.2068.1.A1_at        | BG631401   | TC24040 | 513  | 224  | 298  | 0.44 | 0.58 | Transcribed locus, weakly similar to NP_001045667.1 [Oryza sativa (japonica cultivar-group)]                    |
| Les.1501.2.S1_at        | BM412826   | TC24040 | 5568 | 2435 | 2301 | 0.44 | 0.41 | Transcribed locus, weakly similar to NP_172635.1 protein [Arabidopsis thaliana]                                 |
| Les.2261.1.A1_at        | BG735361   | BG73536 | 95   | 41   | 51   | 0.44 | 0.54 | Transcribed locus                                                                                               |
| Les.3330.1.S1_at        | AW650121   | TC24355 | 850  | 371  | 391  | 0.44 | 0.46 | Transcribed locus, weakly similar to NP_001044764.1 [Oryza sativa (japonica cultivar-group)]                    |
| LesAffx.24799.1.S1_at   | CK715756   | TC23394 | 295  | 129  | 201  | 0.44 | 0.68 | Transcribed locus, weakly similar to NP_001045764.1 [Oryza sativa (japonica cultivar-group)]                    |
| LesAffx.46815.1.S1_at   | BI934723   | TC21911 | 398  | 174  | 202  | 0.44 | 0.51 | Hypothetical LOC544002                                                                                          |
| LesAffx.47142.1.S1_at   | BF114155   | TC22906 | 57   | 25   | 29   | 0.44 | 0.5  | Transcribed locus, weakly similar to NP_001042988.1 [Oryza sativa (japonica cultivar-group)]                    |
| Les.4563.1.S1_at        | BT014344.1 | TC23345 | 430  | 187  | 233  | 0.43 | 0.54 | Lycopersicon esculentum clone 133619F, mRNA sequence                                                            |
| LesAffx.66879.1.A1_at   | BG631312   | TC22769 | 891  | 386  | 696  | 0.43 | 0.78 | CDNA, clone: FC04CE09, HTC in fruit                                                                             |
| Les.2917.1.S1_at        | BM412347   | TC22799 | 464  | 201  | 152  | 0.43 | 0.33 | Transcribed locus                                                                                               |
| Les.3368.1.S1_at        | BT014303.1 | TC22868 | 2553 | 1105 | 1358 | 0.43 | 0.53 | Lycopersicon esculentum clone 133554R, mRNA sequence                                                            |
| Les.1562.1.S1_at        | BG629310   | TC23006 | 316  | 137  | 119  | 0.43 | 0.38 | Lycopersicon esculentum clone 133516F, mRNA sequence                                                            |
| Les.4549.1.S1_at        | BT013085.1 | TC24365 | 101  | 44   | 41   | 0.43 | 0.4  | Lycopersicon esculentum clone 114349R, mRNA sequence                                                            |

|                       |            |         |      |      |      |      |      |                                                                                                                 |
|-----------------------|------------|---------|------|------|------|------|------|-----------------------------------------------------------------------------------------------------------------|
| LesAffx.24799.2.A1_at | BI209670   | TC24255 | 217  | 94   | 144  | 0.43 | 0.67 | Transcribed locus, weakly similar to NP_001045764.1 [Oryza sativa (japonica cultivar-group)]                    |
| Les.4334.1.A1_at      | BG626518   | TC24039 | 1164 | 502  | 553  | 0.43 | 0.48 | Transcribed locus, weakly similar to XP_001109838.1 ribulose-5-phosphate-3-epimerase isoform 5 [Macaca mulatta] |
| Les.4899.1.S1_a_at    | BT012863.1 |         | 22   | 9    | 12   | 0.43 | 0.54 | Lycopersicon esculentum clone 113951F, mRNA sequence                                                            |
| Les.1808.1.A1_at      | BG629204   |         | 9    | 4    | 5    | 0.43 | 0.56 | Transcribed locus                                                                                               |
| LesAffx.9007.1.S1_at  | CN385923   | GO37540 | 1335 | 573  | 830  | 0.43 | 0.62 | Transcribed locus, weakly similar to NP_001042158.1 [Oryza sativa (japonica cultivar-group)]                    |
| Les.4529.1.S1_at      | AY497478.1 | TC21903 | 336  | 144  | 89   | 0.43 | 0.26 | xyloglucan endotransglucosylase-hydrolase XTH7                                                                  |
| Les.4880.1.S1_at      | BT012820.1 | TC24340 | 541  | 231  | 533  | 0.43 | 0.99 | Lycopersicon esculentum clone 113867R, mRNA sequence                                                            |
| Les.799.1.A1_at       | BG627521   | BG62752 | 1066 | 456  | 270  | 0.43 | 0.25 | Transcribed locus, weakly similar to NP_001052094.1 [Oryza sativa (japonica cultivar-group)]                    |
| Les.5221.1.S1_at      | BT013523.1 | TC24473 | 511  | 218  | 398  | 0.43 | 0.78 | Lycopersicon esculentum clone 132241R, mRNA sequence                                                            |
| Les.1079.1.S1_at      | BI931317   | TC21949 | 119  | 51   | 59   | 0.43 | 0.5  | Transcribed locus, weakly similar to NP_001043162.1 [Oryza sativa (japonica cultivar-group)]                    |
| Les.4615.1.S1_at      | BE462687   | TC22537 | 3031 | 1293 | 3045 | 0.43 | 1    | Lycopersicon esculentum clone 113657R, mRNA sequence                                                            |
| LesAffx.7472.2.S1_at  | AW651303   | TC23954 | 119  | 51   | 42   | 0.43 | 0.35 | Transcribed locus, weakly similar to NP_001043730.1 [Oryza sativa (japonica cultivar-group)]                    |
| LesAffx.24696.1.S1_at | AW034874   | DB70637 | 120  | 51   | 162  | 0.43 | 1.35 | Transcribed locus, weakly similar to NP_001043378.1 [Oryza sativa (japonica cultivar-group)]                    |
| Les.3819.1.S1_at      | AY140893.1 | TC21842 | 1121 | 477  | 1073 | 0.43 | 0.96 | ovate protein                                                                                                   |
| LesAffx.55463.1.S1_at | AW651085   | TC23651 | 83   | 35   | 68   | 0.43 | 0.81 | ---                                                                                                             |
| Les.1977.3.S1_at      | BM410747   | TC23608 | 1239 | 526  | 419  | 0.42 | 0.34 | Transcribed locus, weakly similar to XP_001097638.1 similar to CG32699-PA [Macaca mulatta]                      |
| LesAffx.58110.1.A1_at | AJ785349   | BE43527 | 265  | 112  | 94   | 0.42 | 0.36 | ---                                                                                                             |
| Les.3011.1.S1_at      | BT012732.1 | TC23275 | 1382 | 586  | 799  | 0.42 | 0.58 | Light dependent NADH:protochlorophyllide oxidoreductase 2                                                       |
| LesAffx.67395.1.S1_at | AI490749   | TC23607 | 987  | 418  | 583  | 0.42 | 0.59 | Transcribed locus, weakly similar to NP_001055520.1 [Oryza sativa (japonica cultivar-group)]                    |
| Les.2122.1.A1_at      | BG631753   | TC22836 | 14   | 6    | 27   | 0.42 | 2    | Transcribed locus                                                                                               |
| LesAffx.65060.1.S1_at | CK716180   | DV10448 | 953  | 402  | 299  | 0.42 | 0.31 | ---                                                                                                             |
| Les.1310.1.S1_at      | BT013430.1 | TC22042 | 2741 | 1155 | 787  | 0.42 | 0.29 | Lycopersicon esculentum clone 132070F, mRNA sequence                                                            |
| Les.5610.1.S1_at      | BT014251.1 | TC22162 | 3516 | 1481 | 3012 | 0.42 | 0.86 | Lycopersicon esculentum clone 133453R, mRNA sequence                                                            |
| LesAffx.46815.2.S1_at | BI929852   | TC22829 | 1145 | 482  | 605  | 0.42 | 0.53 | Hypothetical LOC544002                                                                                          |
| Les.5865.1.S1_at      | BT013275.1 | TC23540 | 1276 | 537  | 1964 | 0.42 | 1.54 | Lycopersicon esculentum clone 134853R, mRNA sequence                                                            |
| Les.67.1.S1_at        | U49330.1   | TC21724 | 6290 | 2639 | 4581 | 0.42 | 0.73 | pectin methylesterase                                                                                           |

|                       |            |         |      |     |      |      |      |                                                                                                                 |
|-----------------------|------------|---------|------|-----|------|------|------|-----------------------------------------------------------------------------------------------------------------|
| LesAffx.26471.2.S1_at | AW218197   | TC22883 | 46   | 19  | 44   | 0.42 | 0.96 | Transcribed locus, weakly similar to NP_001054088.1 [Oryza sativa (japonica cultivar-group)]                    |
| Les.5786.1.S1_at      | BT014563.1 | TC22614 | 2066 | 866 | 1024 | 0.42 | 0.5  | Lycopersicon esculentum clone 134017R, mRNA sequence                                                            |
| LesAffx.33890.1.S1_at | BG134582   | TC22584 | 60   | 25  | 50   | 0.42 | 0.83 | Transcribed locus, weakly similar to NP_001067602.1 [Oryza sativa (japonica cultivar-group)]                    |
| LesAffx.54718.1.S1_at | BM411779   | TC22617 | 331  | 138 | 167  | 0.42 | 0.5  | Transcribed locus, moderately similar to NP_001044227.1 [Oryza sativa (japonica cultivar-group)]                |
| Les.2012.1.S1_at      | BG627650   | TC23373 | 196  | 82  | 46   | 0.42 | 0.24 | Myo-inositol-1-phosphate synthase                                                                               |
| LesAffx.71563.1.A1_at | AI487345   | TC22892 | 310  | 129 | 122  | 0.42 | 0.39 | ---                                                                                                             |
| Les.1940.1.A1_at      | BG630347   | TC22797 | 803  | 333 | 427  | 0.41 | 0.53 | Transcribed locus, weakly similar to NP_001046378.1 [Oryza sativa (japonica cultivar-group)]                    |
| Les.1179.1.A1_at      | BG629888   | TC24291 | 241  | 100 | 180  | 0.41 | 0.75 | Transcribed locus                                                                                               |
| LesAffx.39072.1.S1_at | BI211118   | TC22430 | 1594 | 661 | 918  | 0.41 | 0.58 | Transcribed locus, weakly similar to NP_172552.2 protein [Arabidopsis thaliana]                                 |
| Les.5198.1.S1_at      | BT013491.1 |         | 448  | 186 | 367  | 0.41 | 0.82 | Lycopersicon esculentum clone 132175F, mRNA sequence                                                            |
| Les.3748.1.S1_at      | AB023388.1 | TC22967 | 1360 | 563 | 668  | 0.41 | 0.49 | acid phosphatase                                                                                                |
| Les.3094.3.S1_at      | BG125458   | TC23596 | 1412 | 583 | 420  | 0.41 | 0.3  | Transcribed locus, weakly similar to NP_001041542.1 P450, family 51, subfamily A, polypeptide 1 [Gallus gallus] |
| Les.3733.1.S1_at      | AF096776.1 | TC21836 | 791  | 326 | 599  | 0.41 | 0.76 | expansin                                                                                                        |
| Les.3771.1.S1_at      | Y14387.1   | TC22876 | 191  | 78  | 119  | 0.41 | 0.62 | lycopene epsilon-cyclase                                                                                        |
| Les.2529.2.S1_at      | BI421300   | TC22334 | 624  | 257 | 481  | 0.41 | 0.77 | Transcribed locus, weakly similar to NP_001041768.1 [Oryza sativa (japonica cultivar-group)]                    |
| Les.206.1.S1_at       | AW625821   | TC23716 | 1292 | 530 | 1725 | 0.41 | 1.34 | Transcribed locus, moderately similar to NP_001046132.1 [Oryza sativa (japonica cultivar-group)]                |
| Les.3034.1.S1_at      | BG631511   | TC22683 | 1900 | 779 | 1399 | 0.41 | 0.74 | Lycopersicon esculentum clone 114419R, mRNA sequence                                                            |
| Les.5223.1.S1_at      | BT013527.1 | TC23738 | 1467 | 600 | 1178 | 0.41 | 0.8  | Lycopersicon esculentum clone 132245R, mRNA sequence                                                            |
| LesAffx.68607.1.S1_at | BM409831   | TC23658 | 1132 | 461 | 564  | 0.41 | 0.5  | Transcribed locus, weakly similar to NP_001049586.1 [Oryza sativa (japonica cultivar-group)]                    |
| Les.4097.1.A1_at      | AF022018.1 | TC22516 | 568  | 231 | 202  | 0.41 | 0.36 | IAA7 protein                                                                                                    |
| LesAffx.56.16.A1_at   | BG643188   | AI89840 | 359  | 146 | 174  | 0.41 | 0.48 | Transcribed locus, moderately similar to NP_001059779.1 [Oryza sativa (japonica cultivar-group)]                |
| Les.3214.2.S1_at      | BF050423   | TC21991 | 587  | 239 | 191  | 0.41 | 0.32 | Transcribed locus, strongly similar to NP_001064609.1 [Oryza sativa (japonica cultivar-group)]                  |
| Les.4089.1.S1_at      | BG642986   | TC22862 | 870  | 353 | 626  | 0.41 | 0.72 | Transcribed locus                                                                                               |
| LesAffx.30937.1.A1_at | AJ785090   |         | 575  | 234 | 191  | 0.41 | 0.33 | ---                                                                                                             |
| Les.2168.1.S1_at      | BT013274.1 | TC23964 | 2082 | 846 | 344  | 0.41 | 0.17 | Lycopersicon esculentum clone 134851R, mRNA sequence                                                            |
| Les.3016.1.S1_at      | BT012757.1 | TC24030 | 815  | 330 | 122  | 0.4  | 0.15 | Lycopersicon esculentum clone 113701F, mRNA sequence                                                            |

|                       |            |         |      |      |      |      |      |                                                                                                                 |
|-----------------------|------------|---------|------|------|------|------|------|-----------------------------------------------------------------------------------------------------------------|
| Les.3216.3.S1_at      | AW649713   | TC22776 | 491  | 198  | 229  | 0.4  | 0.47 | Transcribed locus, moderately similar to NP_001043347.1 [Oryza sativa (japonica cultivar-group)]                |
| Les.4097.1.S1_at      | AF022018.1 | TC22516 | 1611 | 650  | 655  | 0.4  | 0.41 | IAA7 protein                                                                                                    |
| Les.4564.1.S1_at      | BT013856.1 | TC21760 | 2870 | 1155 | 1916 | 0.4  | 0.67 | Lycopersicon esculentum clone 132816F, mRNA sequence                                                            |
| LesAffx.65678.1.S1_at | AW442323   | AW22314 | 727  | 292  | 296  | 0.4  | 0.41 | Transcribed locus, weakly similar to XP_001091707.1 interleukin-1 receptor-associated kinase 4 [Macaca mulatta] |
| Les.5791.1.S1_at      | BT014572.1 | TC22816 | 794  | 319  | 373  | 0.4  | 0.47 | Lycopersicon esculentum clone 134027R, mRNA sequence                                                            |
| Les.3247.1.S1_at      | BT013622.1 | TC22319 | 2639 | 1057 | 1295 | 0.4  | 0.49 | Lycopersicon esculentum clone 132423F, mRNA sequence                                                            |
| Les.3636.1.S1_at      | Y11268.1   | TC23558 | 357  | 143  | 388  | 0.4  | 1.09 | endo-1,4-beta-D-glucanase                                                                                       |
| LesAffx.24799.2.S1_at | BI209670   | TC24255 | 472  | 189  | 327  | 0.4  | 0.69 | Transcribed locus, weakly similar to NP_001045764.1 [Oryza sativa (japonica cultivar-group)]                    |
| LesAffx.30938.1.S1_at | AJ785088   | TC22113 | 391  | 156  | 127  | 0.4  | 0.32 | Transcribed locus, weakly similar to NP_001042177.1 [Oryza sativa (japonica cultivar-group)]                    |
| Les.3019.1.S1_at      | BI926148   | TC23144 | 415  | 165  | 199  | 0.4  | 0.48 | Transcribed locus, weakly similar to NP_065956.1 dehydrogenase 14 (all-trans and 9-cis) [Homo sapiens]          |
| Les.5214.1.S1_at      | BT013515.1 | DB71633 | 1065 | 423  | 648  | 0.4  | 0.61 | Lycopersicon esculentum clone 132232R, mRNA sequence                                                            |
| Les.3279.2.S1_at      | BI933014   | TC21783 | 2940 | 1166 | 1240 | 0.4  | 0.42 | Transcribed locus, weakly similar to NP_001042478.1 [Oryza sativa (japonica cultivar-group)]                    |
| Les.5670.1.S1_at      | BT014359.1 | TC22878 | 185  | 73   | 152  | 0.4  | 0.82 | Lycopersicon esculentum clone 133637R, mRNA sequence                                                            |
| LesAffx.17924.1.S1_at | BG124217   | TC24101 | 891  | 353  | 435  | 0.4  | 0.49 | Transcribed locus, weakly similar to NP_001049241.1 [Oryza sativa (japonica cultivar-group)]                    |
| LesAffx.48876.1.S1_at | AW622727   | AW62272 | 48   | 19   | 43   | 0.4  | 0.89 | ---                                                                                                             |
| LesAffx.64206.1.S1_at | AW034232   | TC21738 | 2480 | 981  | 1230 | 0.4  | 0.5  | Transcribed locus, weakly similar to NP_001041979.1 [Oryza sativa (japonica cultivar-group)]                    |
| Les.790.1.A1_at       | BG627458   | TC23127 | 413  | 163  | 120  | 0.4  | 0.29 | Transcribed locus, weakly similar to NP_001052896.1 [Oryza sativa (japonica cultivar-group)]                    |
| LesAffx.56237.1.S1_at | AW218110   | TC22223 | 213  | 84   | 214  | 0.39 | 1.01 | Transcribed locus, weakly similar to NP_001041856.1 [Oryza sativa (japonica cultivar-group)]                    |
| Les.394.1.A1_at       | BG627056   | TC23820 | 698  | 275  | 281  | 0.39 | 0.4  | Transcribed locus                                                                                               |
| Les.720.1.A1_at       | BG631868   | TC24279 | 2556 | 1005 | 994  | 0.39 | 0.39 | Transcribed locus, weakly similar to NP_001042731.1 [Oryza sativa (japonica cultivar-group)]                    |
| LesAffx.58110.1.S1_at | BE435276   | BE43527 | 1191 | 469  | 422  | 0.39 | 0.35 | ---                                                                                                             |
| Les.2923.1.S1_at      | BI925625   | TC23094 | 4746 | 1865 | 2978 | 0.39 | 0.63 | Transcribed locus, weakly similar to NP_001044052.1 [Oryza sativa (japonica cultivar-group)]                    |
| Les.2141.1.A1_at      | BG734555   | BG73455 | 191  | 75   | 86   | 0.39 | 0.45 | Transcribed locus                                                                                               |
| Les.3569.1.S1_at      | AF059487.1 | TC21833 | 1553 | 608  | 1055 | 0.39 | 0.68 | expansin A3                                                                                                     |

|                       |            |         |      |      |      |      |      |                                                                                                          |
|-----------------------|------------|---------|------|------|------|------|------|----------------------------------------------------------------------------------------------------------|
| Les.1977.2.S1_at      | AW930109   | TC21826 | 834  | 326  | 270  | 0.39 | 0.32 | Transcribed locus, weakly similar to XP_001097638.1 similar to CG32699-PA [Macaca mulatta]               |
| Les.2529.1.A1_at      | BG631274   | TC24469 | 1087 | 424  | 784  | 0.39 | 0.72 | Transcribed locus, weakly similar to NP_001041768.1 [Oryza sativa (japonica cultivar-group)]             |
| Les.4962.1.S1_at      | BI204454   | TC22450 | 778  | 303  | 702  | 0.39 | 0.9  | Lycopersicon esculentum clone 114228R, mRNA sequence                                                     |
| Les.3330.2.S1_at      | BE458823   | TC24355 | 1703 | 664  | 698  | 0.39 | 0.41 | Transcribed locus, weakly similar to NP_001044764.1 [Oryza sativa (japonica cultivar-group)]             |
| Les.5290.1.S1_at      | BT013644.1 | TC23296 | 2617 | 1019 | 1603 | 0.39 | 0.61 | Lycopersicon esculentum clone 132449R, mRNA sequence                                                     |
| LesAffx.66226.1.S1_at | BI926952   | TC22735 | 282  | 110  | 319  | 0.39 | 1.13 | Transcribed locus, weakly similar to NP_001041821.1 [Oryza sativa (japonica cultivar-group)]             |
| Les.1835.1.S1_at      | BG629491   | TC23603 | 787  | 306  | 442  | 0.39 | 0.56 | Lycopersicon esculentum clone 132743F, mRNA sequence                                                     |
| LesAffx.71563.1.S1_at | AW930851   | TC22892 | 429  | 167  | 188  | 0.39 | 0.44 | ---                                                                                                      |
| Les.828.1.A1_at       | BG627663   | TC24124 | 384  | 149  | 91   | 0.39 | 0.24 | Transcribed locus                                                                                        |
| Les.2545.1.S1_at      | BT014360.1 | TC22148 | 3725 | 1440 | 2894 | 0.39 | 0.78 | Lycopersicon esculentum clone 133646R, mRNA sequence                                                     |
| Les.4259.1.S1_at      | BG629037   | TC24424 | 3428 | 1323 | 1204 | 0.39 | 0.35 | Transcribed locus, weakly similar to XP_001082599.1 cysteine and glycine-rich protein 2 [Macaca mulatta] |
| Les.3216.2.S1_at      | BG129507   | TC22776 | 2130 | 821  | 942  | 0.39 | 0.44 | Transcribed locus, moderately similar to NP_001043347.1 [Oryza sativa (japonica cultivar-group)]         |
| Les.5419.1.S1_at      | BT013877.1 | TC23973 | 1085 | 418  | 779  | 0.39 | 0.72 | Lycopersicon esculentum clone 132857F, mRNA sequence                                                     |
| Les.2547.1.A1_at      | BG627349   | TC23877 | 318  | 122  | 365  | 0.38 | 1.15 | Transcribed locus, weakly similar to NP_001041979.1 [Oryza sativa (japonica cultivar-group)]             |
| Les.1988.1.A1_at      | BG630760   | BG62625 | 2201 | 846  | 698  | 0.38 | 0.32 | Transcribed locus                                                                                        |
| Les.4613.1.S1_at      | BT013526.1 |         | 4698 | 1803 | 3213 | 0.38 | 0.68 | Lycopersicon esculentum clone 132244R, mRNA sequence                                                     |
| Les.4007.1.S1_at      | BG629658   | TC22991 | 2626 | 1007 | 1283 | 0.38 | 0.49 | 33 kDa oxygen-evolving protein                                                                           |
| Les.2626.1.S1_at      | BG735008   | TC22245 | 1281 | 490  | 1223 | 0.38 | 0.95 | Lycopersicon esculentum clone 132901F, mRNA sequence                                                     |
| Les.1851.1.A1_at      | BG629607   | BG62960 | 934  | 357  | 606  | 0.38 | 0.65 | Transcribed locus                                                                                        |
| Les.3330.3.A1_at      | BG629064   | TC24355 | 1804 | 686  | 768  | 0.38 | 0.43 | Transcribed locus, weakly similar to NP_001044764.1 [Oryza sativa (japonica cultivar-group)]             |
| Les.3500.1.S1_at      | AF043085.1 | TC21717 | 750  | 283  | 358  | 0.38 | 0.48 | ethylene receptor homolog                                                                                |
| Les.3065.1.S1_at      | BI929558   | TC22543 | 310  | 117  | 74   | 0.38 | 0.24 | Transcribed locus, weakly similar to NP_001042793.1 [Oryza sativa (japonica cultivar-group)]             |
| Les.2325.1.S1_at      | BG625896   | TC22401 | 271  | 102  | 139  | 0.38 | 0.51 | yfe37 protein                                                                                            |
| Les.1212.1.S1_at      | AY584532.1 | GO37246 | 6864 | 2577 | 3489 | 0.38 | 0.51 | DWARF1/DIMINUTO                                                                                          |
| Les.3017.1.A1_at      | BG629826   | AI78132 | 1113 | 417  | 828  | 0.37 | 0.74 | Transcribed locus, weakly similar to XP_001084411.1 aquaporin 1 [Macaca mulatta]                         |

|                       |            |         |      |      |      |      |      |                                                                                                                               |
|-----------------------|------------|---------|------|------|------|------|------|-------------------------------------------------------------------------------------------------------------------------------|
| Les.3216.1.S1_at      | AW930422   | TC22776 | 2629 | 984  | 1066 | 0.37 | 0.41 | Transcribed locus, moderately similar to NP_001043347.1 [Oryza sativa (japonica cultivar-group)]                              |
| Les.1465.1.S1_at      | BG631822   | TC23566 | 1045 | 391  | 234  | 0.37 | 0.22 | Lycopersicon esculentum clone 132131F, mRNA sequence                                                                          |
| LesAffx.53474.1.S1_at | BG133264   | TC22918 | 1281 | 475  | 509  | 0.37 | 0.4  | Transcribed locus, weakly similar to NP_001042043.1 [Oryza sativa (japonica cultivar-group)]                                  |
| LesAffx.5776.1.S1_at  | BG127982   | BG12798 | 146  | 54   | 66   | 0.37 | 0.45 | phytochromobilin synthase                                                                                                     |
| Les.3122.1.S1_a_at    | BT013364.1 | TC21726 | 108  | 40   | 96   | 0.37 | 0.89 | pectin esterase                                                                                                               |
| LesAffx.770.1.S1_at   | BI210904   | BI21090 | 177  | 66   | 99   | 0.37 | 0.56 | ---                                                                                                                           |
| Les.1784.1.S1_at      | BI931777   | TC24140 | 2175 | 803  | 554  | 0.37 | 0.25 | Transcribed locus, weakly similar to XP_001118335.1 similar to intestinal facilitative glucose transporter 7 [Macaca mulatta] |
| Les.4008.1.S1_at      | BG630151   | TC21741 | 4876 | 1801 | 2552 | 0.37 | 0.52 | xyloglucan endotransglycosylase/hydrolase 16 protein                                                                          |
| Les.4170.1.A1_at      | BG628936   | BG62893 | 9    | 3    | 8    | 0.37 | 0.91 | Transcribed locus                                                                                                             |
| Les.5312.1.S1_at      | BT013697.1 | TC22735 | 2479 | 913  | 357  | 0.37 | 0.14 | Lycopersicon esculentum clone 132539F, mRNA sequence                                                                          |
| LesAffx.56.16.S1_at   | BG643188   | AI89840 | 2285 | 840  | 1468 | 0.37 | 0.64 | Transcribed locus, moderately similar to NP_001059779.1 [Oryza sativa (japonica cultivar-group)]                              |
| LesAffx.286.9.S1_at   | CK716206   | BP89354 | 2786 | 1023 | 885  | 0.37 | 0.32 | ---                                                                                                                           |
| Les.5333.1.S1_at      | BT013726.1 | TC22354 | 1478 | 542  | 993  | 0.37 | 0.67 | Lycopersicon esculentum clone 132585F, mRNA sequence                                                                          |
| LesAffx.66966.1.S1_at | BG135649   | TC22051 | 317  | 116  | 174  | 0.37 | 0.55 | Transcribed locus, weakly similar to XP_001102266.1 alpha-N-acetylgalactosaminidase [Macaca mulatta]                          |
| Les.3312.2.S1_at      | BI932707   | TC21843 | 4904 | 1790 | 2843 | 0.37 | 0.58 | Transcribed locus, weakly similar to NP_001043993.1 [Oryza sativa (japonica cultivar-group)]                                  |
| LesAffx.53061.1.S1_at | BI208217   | TC23775 | 392  | 143  | 251  | 0.36 | 0.64 | Transcribed locus, weakly similar to NP_001059549.1 [Oryza sativa (japonica cultivar-group)]                                  |
| Les.3019.2.S1_at      | BG128957   | BI93132 | 493  | 179  | 225  | 0.36 | 0.46 | Transcribed locus, weakly similar to NP_065956.1 dehydrogenase 14 (all-trans and 9-cis) [Homo sapiens]                        |
| LesAffx.58019.1.S1_at | BI929233   | TC22171 | 233  | 84   | 208  | 0.36 | 0.89 | Transcribed locus, weakly similar to NP_001052012.1 [Oryza sativa (japonica cultivar-group)]                                  |
| Les.1197.2.A1_at      | BG630003   | TC23124 | 2960 | 1070 | 1176 | 0.36 | 0.4  | Transcribed locus, weakly similar to XP_001090911.1 LanC lantibiotic synthetase component C-like 2 isoform 2 [Macaca mulatta] |
| Les.5150.1.S1_at      | BT013389.1 | AW92832 | 548  | 197  | 177  | 0.36 | 0.32 | Lycopersicon esculentum clone 135570F, mRNA sequence                                                                          |
| Les.3299.1.S1_at      | BI933484   | TC23916 | 258  | 93   | 59   | 0.36 | 0.23 | Arginase 2                                                                                                                    |
| Les.2831.1.S1_at      | BG627219   | TC22500 | 3936 | 1415 | 2031 | 0.36 | 0.52 | Lycopersicon esculentum clone 132363R, mRNA sequence                                                                          |
| Les.5120.1.S1_at      | BT013322.1 | TC21818 | 657  | 235  | 222  | 0.36 | 0.34 | Lycopersicon esculentum clone 135034F, mRNA sequence                                                                          |
| LesAffx.14321.1.S1_at | AW737808   | AW73780 | 176  | 63   | 51   | 0.36 | 0.29 | ---                                                                                                                           |
| Les.1557.1.A1_at      | BG626732   | TC24262 | 2121 | 758  | 812  | 0.36 | 0.38 | Transcribed locus                                                                                                             |
| Les.3055.1.S1_at      | AJ002590.1 | TC21769 | 453  | 161  | 357  | 0.36 | 0.79 | CycD3;3 protein                                                                                                               |

|                       |            |         |      |      |      |      |      |                                                                                                                                |
|-----------------------|------------|---------|------|------|------|------|------|--------------------------------------------------------------------------------------------------------------------------------|
| Les.4008.2.S1_at      | BG643663   | TC21741 | 4486 | 1595 | 2258 | 0.36 | 0.5  | xyloglucan endotransglycosylase/hydrolase 16 protein                                                                           |
| Les.181.1.A1_at       | BG630947   | TC23820 | 242  | 86   | 95   | 0.35 | 0.39 | Transcribed locus, weakly similar to NP_001043252.1 [Oryza sativa (japonica cultivar-group)]                                   |
| LesAffx.105.1.S1_at   | CK715483   | TC22543 | 70   | 25   | 59   | 0.35 | 0.84 | Transcribed locus, weakly similar to NP_001052215.1 [Oryza sativa (japonica cultivar-group)]                                   |
| Les.1959.1.A1_at      | BG630503   | TC23129 | 74   | 26   | 28   | 0.35 | 0.38 | Transcribed locus                                                                                                              |
| Les.1654.1.A1_at      | BG627748   | TC23489 | 2541 | 897  | 1011 | 0.35 | 0.4  | Transcribed locus, weakly similar to NP_001042315.1 [Oryza sativa (japonica cultivar-group)]                                   |
| LesAffx.71503.1.S1_at | AW648310   | TC22254 | 961  | 338  | 538  | 0.35 | 0.56 | Transcribed locus, weakly similar to NP_001044300.1 [Oryza sativa (japonica cultivar-group)]                                   |
| Les.4696.1.S1_at      | BT014502.1 | TC22932 | 1936 | 679  | 772  | 0.35 | 0.4  | Lycopersicon esculentum clone 133876F, mRNA sequence                                                                           |
| Les.1258.1.S1_at      | AY240230.1 | TC21731 | 2255 | 790  | 467  | 0.35 | 0.21 | gamma-aminobutyrate transaminase subunit precursor isozyme 2                                                                   |
| Les.1042.1.A1_at      | BG629025   | TC22972 | 134  | 47   | 119  | 0.35 | 0.89 | Transcribed locus, weakly similar to NP_001042141.1 [Oryza sativa (japonica cultivar-group)]                                   |
| Les.778.1.A1_at       | BG627417   | TC23561 | 486  | 169  | 322  | 0.35 | 0.66 | Transcribed locus                                                                                                              |
| Les.4444.1.S1_s_at    | BI207010   | TC22444 | 235  | 81   | 186  | 0.34 | 0.79 | CycD3;3 protein                                                                                                                |
| LesAffx.69264.1.S1_at | BF113833   | TC23903 | 1648 | 566  | 1212 | 0.34 | 0.74 | Transcribed locus, weakly similar to NP_001047317.1 [Oryza sativa (japonica cultivar-group)]                                   |
| Les.6.1.S1_at         | AF261141.1 | TC22389 | 939  | 322  | 322  | 0.34 | 0.34 | hypothetical LOC543656                                                                                                         |
| Les.3409.1.A1_at      | BG735108   | GO37597 | 2962 | 1016 | 915  | 0.34 | 0.31 | Transcribed locus, weakly similar to NP_001044764.1 [Oryza sativa (japonica cultivar-group)]                                   |
| Les.5832.1.S1_at      | BT014414.1 | TC22401 | 2216 | 760  | 463  | 0.34 | 0.21 | Lycopersicon esculentum clone 133722R, mRNA sequence                                                                           |
| LesAffx.65028.1.S1_at | BG128587   | TC22082 | 2314 | 790  | 1172 | 0.34 | 0.51 | Transcribed locus, weakly similar to NP_001054271.1 [Oryza sativa (japonica cultivar-group)]                                   |
| Les.305.3.S1_at       | AW930072   | TC23404 | 1365 | 462  | 386  | 0.34 | 0.28 | Transcribed locus, weakly similar to XP_001100725.1 similar to eukaryotic translation initiation factor 2C, 2 [Macaca mulatta] |
| Les.1197.1.S1_at      | BI925087   | TC22471 | 858  | 290  | 273  | 0.34 | 0.32 | Transcribed locus, weakly similar to XP_001090911.1 LanC lantibiotic synthetase component C-like 2 isoform 2 [Macaca mulatta]  |
| LesAffx.10497.2.A1_at | AI897776   | TC24435 | 2131 | 716  | 765  | 0.34 | 0.36 | Transcribed locus, weakly similar to NP_001042618.1 [Oryza sativa (japonica cultivar-group)]                                   |
| Les.305.2.S1_at       | CD002775   | TC23749 | 2555 | 856  | 776  | 0.34 | 0.3  | Transcribed locus, weakly similar to XP_001100725.1 similar to eukaryotic translation initiation factor 2C, 2 [Macaca mulatta] |
| Les.3017.3.S1_at      | BE462343   | TC21898 | 760  | 254  | 526  | 0.33 | 0.69 | Transcribed locus, weakly similar to XP_001084411.1 aquaporin 1 [Macaca mulatta]                                               |
| LesAffx.10279.1.S1_at | CK720579   | TC23575 | 356  | 119  | 178  | 0.33 | 0.5  | Transcribed locus, weakly similar to NP_001043142.1 [Oryza sativa (japonica cultivar-group)]                                   |



|                       |            |         |      |      |      |      |      |                                                                                                  |
|-----------------------|------------|---------|------|------|------|------|------|--------------------------------------------------------------------------------------------------|
| Les.4473.1.S1_at      | AJ606077.1 | TC22116 | 586  | 195  | 285  | 0.33 | 0.49 | spe4 protein                                                                                     |
| Les.3123.1.S1_at      | BT013406.1 | TC23016 | 2549 | 846  | 917  | 0.33 | 0.36 | Lycopersicon esculentum clone 135721R, mRNA sequence                                             |
| Les.369.1.S1_at       | AF059489.1 | TC21922 | 1890 | 622  | 1420 | 0.33 | 0.75 | expansin                                                                                         |
| Les.263.1.S1_at       | M98466.1   | TC21722 | 3864 | 1268 | 4277 | 0.33 | 1.11 | polygalacturonase isoenzyme 1 beta subunit                                                       |
| Les.4835.1.S1_at      | BT012722.1 | TC24498 | 370  | 121  | 149  | 0.33 | 0.4  | Lycopersicon esculentum clone 113649F, mRNA sequence                                             |
| Les.4987.1.S1_at      | BT013055.1 | TC23511 | 2308 | 756  | 1346 | 0.33 | 0.58 | Lycopersicon esculentum clone 114311F, mRNA sequence                                             |
| Les.174.1.A1_at       | BG627544   | TC24015 | 365  | 119  | 92   | 0.33 | 0.25 | Transcribed locus, moderately similar to NP_001045188.1 [Oryza sativa (japonica cultivar-group)] |
| Les.70.1.S1_at        | AF000141.1 | NP00014 | 2600 | 848  | 1027 | 0.33 | 0.39 | class I knotted-like homeodomain protein                                                         |
| LesAffx.41518.1.S1_at | AW930080   | TC23094 | 265  | 86   | 140  | 0.32 | 0.53 | Transcribed locus, weakly similar to NP_001050851.1 [Oryza sativa (japonica cultivar-group)]     |
| Les.4731.1.S1_at      | BT013577.1 | TC23297 | 2609 | 845  | 1921 | 0.32 | 0.74 | Lycopersicon esculentum clone 132322R, mRNA sequence                                             |
| Les.2316.2.A1_at      | BG626036   | TC22940 | 3248 | 1050 | 172  | 0.32 | 0.05 | Transcribed locus, weakly similar to NP_001044252.1 [Oryza sativa (japonica cultivar-group)]     |
| Les.3409.2.S1_at      | BF050508   | TC21920 | 1653 | 532  | 440  | 0.32 | 0.27 | Transcribed locus, weakly similar to NP_001044764.1 [Oryza sativa (japonica cultivar-group)]     |
| Les.1108.1.A1_at      | BG629434   | TC22374 | 419  | 135  | 467  | 0.32 | 1.11 | Transcribed locus, weakly similar to NP_001042402.1 [Oryza sativa (japonica cultivar-group)]     |
| LesAffx.65984.1.S1_at | BG125327   | GO37430 | 2600 | 833  | 791  | 0.32 | 0.3  | Transcribed locus, weakly similar to NP_001044052.1 [Oryza sativa (japonica cultivar-group)]     |
| Les.252.1.S1_at       | U35643.1   | DB68734 | 2965 | 945  | 1343 | 0.32 | 0.45 | Alpha-dioxygenase 2                                                                              |
| LesAffx.10279.1.A1_at | CK720579   | TC23575 | 515  | 163  | 256  | 0.32 | 0.5  | Transcribed locus, weakly similar to NP_001043142.1 [Oryza sativa (japonica cultivar-group)]     |
| Les.4738.1.S1_at      | BT013480.1 | GO37558 | 2215 | 702  | 1325 | 0.32 | 0.6  | Lycopersicon esculentum clone 132163F, mRNA sequence                                             |
| Les.3630.1.S1_at      | U50985.1   | TC21720 | 224  | 71   | 204  | 0.32 | 0.91 | pectin esterase                                                                                  |
| Les.2923.2.S1_at      | BI935057   | TC23094 | 2412 | 763  | 1225 | 0.32 | 0.51 | Transcribed locus, weakly similar to NP_001044052.1 [Oryza sativa (japonica cultivar-group)]     |
| Les.513.1.S1_at       | BG626001   | TC22866 | 301  | 95   | 68   | 0.32 | 0.23 | Lycopersicon esculentum clone 132360F, mRNA sequence                                             |
| Les.2091.1.S1_at      | BT013457.1 | TC22626 | 893  | 282  | 438  | 0.32 | 0.49 | Lycopersicon esculentum clone 132113R, mRNA sequence                                             |
| LesAffx.66226.2.S1_at | BI205336   | TC22735 | 802  | 253  | 929  | 0.32 | 1.16 | Transcribed locus, weakly similar to NP_001041821.1 [Oryza sativa (japonica cultivar-group)]     |
| Les.204.1.S1_at       | L41126.1   | TC21759 | 2599 | 816  | 1150 | 0.31 | 0.44 | ADP-glucose pyrophosphorylase small subunit                                                      |
| Les.1376.2.A1_at      | BG629093   | TC23229 | 729  | 228  | 420  | 0.31 | 0.58 | Transcribed locus, weakly similar to NP_001043392.1 [Oryza sativa (japonica cultivar-group)]     |
| Les.1376.1.A1_at      | BG631198   | TC23229 | 2283 | 715  | 1191 | 0.31 | 0.52 | Transcribed locus, weakly similar to NP_001043392.1 [Oryza sativa (japonica cultivar-group)]     |

|                       |            |         |      |      |      |      |      |                                                                                                                                 |
|-----------------------|------------|---------|------|------|------|------|------|---------------------------------------------------------------------------------------------------------------------------------|
| Les.3303.1.S1_at      | BT012987.1 | TC23470 | 1909 | 591  | 689  | 0.31 | 0.36 | Lycopersicon esculentum clone 114205R, mRNA sequence                                                                            |
| Les.4334.3.A1_at      | BG735063   | TC22597 | 127  | 39   | 66   | 0.31 | 0.52 | Transcribed locus, weakly similar to XP_001109838.1 ribulose-5-phosphate-3-epimerase isoform 5 [Macaca mulatta]                 |
| Les.642.1.S1_at       | BG626672   | BG62667 | 112  | 35   | 46   | 0.31 | 0.41 | Lycopersicon esculentum clone 132200F, mRNA sequence                                                                            |
| LesAffx.61000.1.S1_at | BM410987   | TC23050 | 1059 | 324  | 287  | 0.31 | 0.27 | Transcribed locus, weakly similar to NP_001045184.1 [Oryza sativa (japonica cultivar-group)]                                    |
| Les.4312.2.S1_at      | BG626083   | TC22795 | 3678 | 1114 | 680  | 0.3  | 0.18 | CDNA, clone: FC02DB04, HTC in fruit                                                                                             |
| Les.406.1.A1_at       | BG629308   | TC24082 | 933  | 282  | 564  | 0.3  | 0.6  | Transcribed locus, weakly similar to NP_196850.1 binding [Arabidopsis thaliana]                                                 |
| Les.4405.1.A1_at      | BG630861   | TC24428 | 1572 | 476  | 216  | 0.3  | 0.14 | Transcribed locus, moderately similar to NP_001047599.1 [Oryza sativa (japonica cultivar-group)]                                |
| LesAffx.39973.1.S1_at | BI932177   | DV10487 | 278  | 84   | 124  | 0.3  | 0.45 | Transcribed locus, weakly similar to NP_001044052.1 [Oryza sativa (japonica cultivar-group)]                                    |
| Les.3065.2.A1_at      | BG630869   | TC22543 | 538  | 160  | 92   | 0.3  | 0.17 | Transcribed locus, weakly similar to NP_001042793.1 [Oryza sativa (japonica cultivar-group)]                                    |
| LesAffx.70738.1.A1_at | BG630069   | TC23199 | 1053 | 310  | 302  | 0.29 | 0.29 | Transcribed locus, weakly similar to XP_001101267.1 similar to myeloblastosis proto-oncogene product isoform 2 [Macaca mulatta] |
| Les.2092.2.S1_at      | BI203427   | BG63176 | 1338 | 393  | 620  | 0.29 | 0.46 | Transcribed locus, weakly similar to XP_001111095.1 aldolase B isoform 5 [Macaca mulatta]                                       |
| Les.1205.2.S1_at      | BM536081   | TC21911 | 690  | 202  | 100  | 0.29 | 0.14 | Transcribed locus, weakly similar to NP_001059455.1 [Oryza sativa (japonica cultivar-group)]                                    |
| LesAffx.13252.1.S1_at | BI929109   | TC22202 | 2857 | 831  | 1463 | 0.29 | 0.51 | Transcribed locus, weakly similar to NP_001042395.1 [Oryza sativa (japonica cultivar-group)]                                    |
| Les.852.1.A1_at       | BG627744   | TC24030 | 88   | 25   | 20   | 0.29 | 0.23 | Transcribed locus                                                                                                               |
| Les.3322.1.S1_at      | BI935557   | TC22083 | 608  | 175  | 69   | 0.29 | 0.11 | Transcribed locus, moderately similar to NP_001047599.1 [Oryza sativa (japonica cultivar-group)]                                |
| LesAffx.13252.2.A1_at | BG124820   | TC22202 | 519  | 149  | 200  | 0.29 | 0.38 | Transcribed locus, weakly similar to NP_001042395.1 [Oryza sativa (japonica cultivar-group)]                                    |
| LesAffx.41330.1.A1_at | CK574967   | TC24064 | 205  | 59   | 90   | 0.29 | 0.44 | Transcribed locus, weakly similar to NP_001067668.1 [Oryza sativa (japonica cultivar-group)]                                    |
| Les.3322.3.S1_at      | AW443800   | BP90402 | 852  | 244  | 118  | 0.29 | 0.14 | Transcribed locus, moderately similar to NP_001047599.1 [Oryza sativa (japonica cultivar-group)]                                |
| Les.5161.1.S1_at      | BT013412.1 | AI77756 | 289  | 83   | 115  | 0.29 | 0.4  | Lycopersicon esculentum clone 132049R, mRNA sequence                                                                            |
| LesAffx.41330.2.S1_at | AI899559   | TC24064 | 324  | 92   | 128  | 0.29 | 0.4  | Transcribed locus, weakly similar to NP_001067668.1 [Oryza sativa (japonica cultivar-group)]                                    |
| Les.3064.1.S1_at      | U81033.1   | TC21721 | 1463 | 418  | 596  | 0.29 | 0.41 | ADP-glucose pyrophosphorylase large subunit                                                                                     |

|                       |            |         |      |      |      |      |      |                                                                                                                           |
|-----------------------|------------|---------|------|------|------|------|------|---------------------------------------------------------------------------------------------------------------------------|
| LesAffx.70270.1.S1_at | AI773931   | TC23665 | 3342 | 953  | 1469 | 0.29 | 0.44 | Transcribed locus, moderately similar to NP_001046164.1 [Oryza sativa (japonica cultivar-group)]                          |
| LesAffx.64757.1.A1_at | AI490042   | TC22570 | 292  | 83   | 102  | 0.28 | 0.35 | Transcribed locus                                                                                                         |
| Les.547.1.S1_at       | AW648331   | TC22628 | 296  | 84   | 305  | 0.28 | 1.03 | Transcribed locus                                                                                                         |
| Les.2316.1.S1_at      | AW623527   | TC22940 | 3123 | 881  | 146  | 0.28 | 0.05 | Transcribed locus, weakly similar to NP_001044252.1 [Oryza sativa (japonica cultivar-group)]                              |
| Les.360.1.S1_at       | M86724.1   | TC23986 | 4174 | 1174 | 5063 | 0.28 | 1.21 | alcohol dehydrogenase                                                                                                     |
| Les.1205.1.A1_at      | BG630057   | TC21911 | 471  | 132  | 115  | 0.28 | 0.24 | Transcribed locus, weakly similar to NP_001059455.1 [Oryza sativa (japonica cultivar-group)]                              |
| LesAffx.885.1.S1_at   | BI205930   | BI20593 | 352  | 98   | 130  | 0.28 | 0.37 | ---                                                                                                                       |
| Les.2092.1.S1_at      | BG626759   | TC22657 | 2338 | 651  | 1349 | 0.28 | 0.58 | Transcribed locus, weakly similar to XP_001111095.1 aldolase B isoform 5 [Macaca mulatta]                                 |
| Les.4794.1.S1_at      | BT014116.1 | TC23742 | 2907 | 806  | 886  | 0.28 | 0.3  | Lycopersicon esculentum clone 133221F, mRNA sequence                                                                      |
| Les.3972.1.S1_at      | AJ243340.1 | TC22219 | 4144 | 1136 | 4381 | 0.27 | 1.06 | expansin9                                                                                                                 |
| Les.4136.1.S1_at      | AJ538329.1 | NP59756 | 1016 | 278  | 145  | 0.27 | 0.14 | wuschel protein                                                                                                           |
| Les.1205.3.S1_at      | BM410805   | TC21911 | 1136 | 310  | 145  | 0.27 | 0.13 | Transcribed locus, weakly similar to NP_001059455.1 [Oryza sativa (japonica cultivar-group)]                              |
| LesAffx.48215.1.S1_at | AW945008   | TC23968 | 2359 | 642  | 893  | 0.27 | 0.38 | Transcribed locus, weakly similar to NP_001043647.1 [Oryza sativa (japonica cultivar-group)]                              |
| Les.1348.1.A1_at      | BG631005   | TC22489 | 1419 | 386  | 607  | 0.27 | 0.43 | Transcribed locus, weakly similar to NP_199517.1 protein [Arabidopsis thaliana]                                           |
| LesAffx.4981.1.S1_at  | AW623022   | TC22429 | 3443 | 928  | 715  | 0.27 | 0.21 | Transcribed locus, weakly similar to NP_001041979.1 [Oryza sativa (japonica cultivar-group)]                              |
| Les.4397.2.A1_at      | AW218741   | TC23761 | 671  | 179  | 251  | 0.27 | 0.37 | CDNA, clone: FC25AG12, HTC in fruit                                                                                       |
| LesAffx.61034.1.S1_at | BG643132   | TC21983 | 1159 | 308  | 728  | 0.27 | 0.63 | Transcribed locus, weakly similar to NP_001043558.1 [Oryza sativa (japonica cultivar-group)]                              |
| Les.5850.1.S1_at      | BT014189.1 | TC21894 | 350  | 92   | 164  | 0.26 | 0.47 | Lycopersicon esculentum clone 133366R, mRNA sequence                                                                      |
| Les.876.1.A1_at       | BG627344   | TC22377 | 179  | 46   | 45   | 0.26 | 0.25 | Transcribed locus, weakly similar to NP_001051973.1 [Oryza sativa (japonica cultivar-group)]                              |
| Les.3069.1.S1_at      | BG630752   | TC21938 | 695  | 175  | 447  | 0.25 | 0.64 | Lycopersicon esculentum clone 132988F, mRNA sequence                                                                      |
| LesAffx.66974.1.S1_at | BG135595   | TC23429 | 106  | 26   | 125  | 0.25 | 1.19 | Transcribed locus, weakly similar to NP_001046313.1 [Oryza sativa (japonica cultivar-group)]                              |
| Les.4397.1.S1_at      | BG127578   | TC23761 | 263  | 65   | 101  | 0.25 | 0.38 | CDNA, clone: FC25AG12, HTC in fruit                                                                                       |
| Les.2474.1.S1_at      | BG791226   | TC23985 | 839  | 204  | 211  | 0.24 | 0.25 | Transcribed locus, weakly similar to XP_001108186.1 similar to 24-dehydrocholesterol reductase precursor [Macaca mulatta] |
| LesAffx.64757.1.S1_at | AI490042   | TC22570 | 464  | 112  | 182  | 0.24 | 0.39 | Transcribed locus                                                                                                         |

|                       |            |         |      |      |      |      |      |                                                                                                                                       |
|-----------------------|------------|---------|------|------|------|------|------|---------------------------------------------------------------------------------------------------------------------------------------|
| Les.2474.2.A1_at      | BG735266   | TC23985 | 1462 | 354  | 398  | 0.24 | 0.27 | Transcribed locus, weakly similar to XP_001108186.1 similar to 24-dehydrocholesterol reductase precursor [Macaca mulatta]             |
| LesAffx.53591.1.S1_at | AI899018   | TC22292 | 122  | 29   | 38   | 0.24 | 0.31 | Transcribed locus, weakly similar to XP_001101267.1 similar to myeloblastosis proto-oncogene product isoform 2 [Macaca mulatta]       |
| Les.5918.1.S1_at      | AY224079.1 | TC21718 | 143  | 34   | 57   | 0.24 | 0.4  | ferric-chelate reductase                                                                                                              |
| Les.3519.1.S1_at      | AJ002589.1 | TC23298 | 577  | 138  | 350  | 0.24 | 0.61 | CycD3;2 protein                                                                                                                       |
| Les.1951.1.A1_at      | BG630440   | TC23845 | 5340 | 1270 | 2134 | 0.24 | 0.4  | Transcribed locus, weakly similar to NP_188563.1 binding [Arabidopsis thaliana]                                                       |
| LesAffx.13252.2.S1_at | BG124820   | TC22202 | 2033 | 482  | 916  | 0.24 | 0.45 | Transcribed locus, weakly similar to NP_001042395.1 [Oryza sativa (japonica cultivar-group)]                                          |
| LesAffx.56547.2.S1_at | BI207815   | TC22569 | 1323 | 312  | 231  | 0.24 | 0.17 | Transcribed locus, weakly similar to NP_001042475.1 [Oryza sativa (japonica cultivar-group)]                                          |
| LesAffx.46085.1.S1_at | AW928724   | TC22038 | 411  | 96   | 80   | 0.23 | 0.2  | Transcribed locus, weakly similar to XP_001114240.1 cytochrome P450, family 21, subfamily A, polypeptide 2 isoform 3 [Macaca mulatta] |
| Les.15.1.S1_at        | X98929.1   | TC21718 | 3016 | 705  | 2083 | 0.23 | 0.69 | SBT1 protein                                                                                                                          |
| LesAffx.44609.1.S1_at | BG631285   | TC23469 | 1392 | 322  | 940  | 0.23 | 0.68 | Transcribed locus, weakly similar to NP_187615.2 factor [Arabidopsis thaliana]                                                        |
| Les.5941.1.A1_at      | CK715706   | TC22893 | 1396 | 322  | 728  | 0.23 | 0.52 | Transcribed locus, weakly similar to NP_001042315.1 [Oryza sativa (japonica cultivar-group)]                                          |
| Les.1549.1.A1_at      | BG626692   | TC23631 | 1106 | 253  | 392  | 0.23 | 0.35 | Transcribed locus                                                                                                                     |
| LesAffx.16472.1.S1_at | AI774397   | TC24204 | 227  | 52   | 154  | 0.23 | 0.68 | ---                                                                                                                                   |
| Les.68.2.S1_a_at      | BT013727.1 | TC21796 | 2320 | 524  | 1106 | 0.23 | 0.48 | endo-beta-1,4-D-glucanase                                                                                                             |
| Les.4749.1.S1_at      | BT013546.1 | AI77484 | 554  | 124  | 254  | 0.22 | 0.46 | Lycopersicon esculentum clone 132267F, mRNA sequence                                                                                  |
| Les.3792.1.S1_s_at    | AF249329.1 | GO37419 | 2871 | 631  | 611  | 0.22 | 0.21 | Lycopersicon esculentum putative cytochrome P450                                                                                      |
| Les.857.1.S1_at       | BT013838.1 | TC22565 | 693  | 151  | 159  | 0.22 | 0.23 | Lycopersicon esculentum clone 132795F, mRNA sequence                                                                                  |
| LesAffx.1251.1.S1_at  | BG125851   | BG12585 | 266  | 58   | 222  | 0.22 | 0.83 | ---                                                                                                                                   |
| Les.4710.1.S1_at      | BT014526.1 | TC24079 | 94   | 20   | 17   | 0.22 | 0.18 | Lycopersicon esculentum clone 133940F, mRNA sequence                                                                                  |
| Les.1714.1.A1_at      | BG628281   | TC24400 | 471  | 100  | 299  | 0.21 | 0.63 | Transcribed locus                                                                                                                     |
| Les.33.1.S1_at        | AF148934.1 | TC22018 | 2943 | 614  | 2034 | 0.21 | 0.69 | phantastica                                                                                                                           |
| Les.4065.1.A1_at      | L24019.1   |         | 66   | 14   | 22   | 0.21 | 0.33 | Lycopersicon esculentum (DB166) meloidogyne-induced giant cell protein mRNA, 3' end                                                   |
| Les.3372.1.S1_at      | BG631141   | TC23249 | 2722 | 556  | 577  | 0.2  | 0.21 | Lycopersicon esculentum clone 132813R, mRNA sequence                                                                                  |
| Les.9.1.S1_at         | AB010992.1 | TC22813 | 1634 | 324  | 323  | 0.2  | 0.2  | 3b-hydroxylase                                                                                                                        |
| LesAffx.23349.1.S1_at | AI782014   | TC21920 | 1000 | 193  | 764  | 0.19 | 0.76 | ADP/ATP translocator                                                                                                                  |
| Les.1614.1.A1_at      | BG628742   | TC23793 | 554  | 102  | 209  | 0.18 | 0.38 | Transcribed locus, moderately similar to NP_001049792.1 [Oryza sativa (japonica cultivar-group)]                                      |
| Les.4938.1.S1_at      | BT012940.1 | TC22310 | 2255 | 399  | 643  | 0.18 | 0.29 | Lycopersicon esculentum clone 114108R, mRNA sequence                                                                                  |

|                      |            |         |      |     |      |      |      |                                                                                                                               |
|----------------------|------------|---------|------|-----|------|------|------|-------------------------------------------------------------------------------------------------------------------------------|
| LesAffx.9038.1.S1_at | BI930643   | TC22956 | 957  | 164 | 161  | 0.17 | 0.17 | Transcribed locus, weakly similar to NP_001042297.1 [Oryza sativa (japonica cultivar-group)]                                  |
| Les.5664.1.S1_at     | BT014348.1 | AW03195 | 881  | 146 | 1364 | 0.17 | 1.55 | Lycopersicon esculentum clone 133623F, mRNA sequence                                                                          |
| LesAffx.56.4.S1_at   | BG128707   | TC22262 | 421  | 62  | 296  | 0.15 | 0.7  | Transcribed locus, weakly similar to XP_001087943.1 similar to carboxypeptidase, vitellogenic-like isoform 4 [Macaca mulatta] |
| Les.4594.1.S1_at     | BT012739.1 | TC23704 | 3669 | 513 | 1376 | 0.14 | 0.38 | Lycopersicon esculentum clone 113677R, mRNA sequence                                                                          |
| LesAffx.3099.1.S1_at | CK574995   | GO37548 | 5135 | 577 | 611  | 0.11 | 0.12 | Transcribed locus, moderately similar to NP_001044625.1 [Oryza sativa (japonica cultivar-group)]                              |

---
