# Supplementary material for: Transcriptome Analysis of Tomato Flower Pedicel Tissues Reveals Abscission Zone-Specific Modulation of Key Meristem Activity Genes
Source: PubMed Central journal article supplement (PMC3563536; doi:10.1371/journal.pone.0055238), 2013-02-04
Supplement: pone.0055238.s006.pdf [file pone.0055238.s006.pdf]

**Table S4.** Differentially expressed genes in the basal portion after 3 h and/or 6 h ethylene treatment.

| Affymetrix Probe Set ID | GenBank Accession | Tomato Gene Index | 0BP  | 3BP  | 6BP  | 3BP/0BP | 6BP/0BP | GenBank Annotation                                                                                                                       |
|-------------------------|-------------------|-------------------|------|------|------|---------|---------|------------------------------------------------------------------------------------------------------------------------------------------|
| Les.3646.1.S1_at        | U70481.1          | TC21735           | 190  | 1814 | 1522 | 9.57    | 8.03    | abscission polygalacturonase                                                                                                             |
| LesAffx.56389.1.S1_at   | AW034707          | TC23934           | 168  | 1459 | 1257 | 8.67    | 7.47    | Transcribed locus, weakly similar to NP_001033715.2 F synthase [ <i>Sus scrofa</i> ]                                                     |
| Les.4885.1.S1_at        | BT012835.1        | TC24138           | 559  | 4064 | 3024 | 7.27    | 5.41    | <i>Lycopersicon esculentum</i> clone 113896R, mRNA sequence                                                                              |
| Les.3665.1.S1_at        | U23053.1          | TC21734           | 9    | 58   | 75   | 6.79    | 8.79    | polygalacturonase precursor                                                                                                              |
| Les.132.1.S1_at         | X58885.1          | TC21743           | 1017 | 6766 | 7754 | 6.65    | 7.63    | ethylene-forming enzyme                                                                                                                  |
| Les.3712.1.S1_at        | AF154003.1        | TC24028           | 443  | 2198 | 1780 | 4.96    | 4.02    | pirin                                                                                                                                    |
| Les.3647.1.S1_at        | U70480.1          | TC21734           | 89   | 414  | 361  | 4.68    | 4.07    | abscission polygalacturonase                                                                                                             |
| Les.113.1.S1_at         | CN384955          | TC23130           | 940  | 4379 | 3468 | 4.66    | 3.69    | CDNA, clone: FC02BG03, HTC in fruit                                                                                                      |
| LesAffx.31873.1.S1_at   | BI928574          | BI92857           | 108  | 432  | 957  | 4.02    | 8.9     | ---                                                                                                                                      |
| LesAffx.13365.1.S1_at   | BM411110          | TC21920           | 588  | 2335 | 765  | 3.97    | 1.3     | Transcribed locus, weakly similar to NP_001066487.1 [ <i>Oryza sativa</i> (japonica cultivar-group)]                                     |
| LesAffx.70406.1.S1_at   | AW036249          | TC22360           | 103  | 398  | 610  | 3.87    | 5.92    | Transcribed locus, weakly similar to XP_001114236.1 branched chain aminotransferase 2, mitochondrial isoform 2 [ <i>Macaca mulatta</i> ] |
| Les.3818.1.S1_at        | AF502085.1        | TC21752           | 90   | 331  | 388  | 3.69    | 4.33    | ethylene responsive element binding protein                                                                                              |
| LesAffx.64582.2.A1_at   | AI490624          | TC24338           | 107  | 377  | 199  | 3.54    | 1.87    | ---                                                                                                                                      |
| LesAffx.64582.1.S1_at   | AI894448          | TC24338           | 243  | 834  | 441  | 3.43    | 1.81    | ---                                                                                                                                      |
| Les.244.2.S1_a_at       | AI485696          | TC22935           | 341  | 1145 | 1009 | 3.36    | 2.96    | Calmodulin                                                                                                                               |
| LesAffx.54536.1.S1_at   | BM409044          | TC23408           | 233  | 779  | 630  | 3.34    | 2.71    | Transcribed locus, weakly similar to NP_001046834.1 [ <i>Oryza sativa</i> (japonica cultivar-group)]                                     |
| LesAffx.63659.1.S1_at   | BI921813          | TC22794           | 389  | 1272 | 1078 | 3.27    | 2.77    | Transcribed locus, weakly similar to NP_001047062.1 [ <i>Oryza sativa</i> (japonica cultivar-group)]                                     |
| LesAffx.33607.1.S1_s_at | AW223067          | TC23890           | 463  | 1480 | 1331 | 3.2     | 2.88    | Calmodulin                                                                                                                               |
| LesAffx.50112.1.S1_at   | AI898985          | TC23361           | 532  | 1676 | 1458 | 3.15    | 2.74    | Transcribed locus, weakly similar to NP_001047062.1 [ <i>Oryza sativa</i> (japonica cultivar-group)]                                     |
| Les.2084.1.S1_at        | BF097539          | TC22764           | 518  | 1632 | 1251 | 3.15    | 2.41    | Transcribed locus, weakly similar to NP_001041763.1 [ <i>Oryza sativa</i> (japonica cultivar-group)]                                     |
| LesAffx.33607.2.S1_s_at | AI775872          | TC23890           | 1215 | 3815 | 3399 | 3.14    | 2.8     | Calmodulin                                                                                                                               |
| LesAffx.56301.1.S1_at   | AI895341          | TC22182           | 1312 | 4090 | 4843 | 3.12    | 3.69    | Transcribed locus, weakly similar to NP_001048145.1 [ <i>Oryza sativa</i> (japonica cultivar-group)]                                     |
| Les.5915.1.S1_at        | AY344539.1        | TC22182           | 23   | 71   | 148  | 3.09    | 6.41    | alpha-DOX1                                                                                                                               |
| Les.1524.1.A1_at        | BG626458          | BG62645           | 471  | 1443 | 964  | 3.07    | 2.05    | Transcribed locus                                                                                                                        |
| LesAffx.69349.2.S1_at   | AW623862          | AW62386           | 243  | 739  | 749  | 3.04    | 3.09    | Transcribed locus, weakly similar to NP_001043801.1 [ <i>Oryza sativa</i> (japonica cultivar-group)]                                     |

|                       |            |          |      |       |      |      |      |                                                                                                                    |
|-----------------------|------------|----------|------|-------|------|------|------|--------------------------------------------------------------------------------------------------------------------|
| LesAffx.63739.1.S1_at | AW033134   | TC21965  | 167  | 502   | 292  | 3    | 1.74 | Transcribed locus, weakly similar to NP_001043665.1 [Oryza sativa (japonica cultivar-group)]                       |
| LesAffx.61149.1.S1_at | BE460847   | TC24084  | 284  | 845   | 1294 | 2.97 | 4.55 | Transcribed locus, weakly similar to NP_001042177.1 [Oryza sativa (japonica cultivar-group)]                       |
| Les.4287.1.S1_at      | CB751564   | TC21784  | 1204 | 3536  | 5184 | 2.94 | 4.31 | Transcribed locus, weakly similar to XP_001094505.1 proteasome 26S non-ATPase subunit 3 isoform 4 [Macaca mulatta] |
| Les.2899.1.S1_at      | BG628131   | TC22810  | 3975 | 11581 | 7784 | 2.91 | 1.96 | Transcribed locus, weakly similar to XP_001108862.1 cathepsin H isoform 2 [Macaca mulatta]                         |
| LesAffx.60582.1.S1_at | AI899413   | TC23540  | 128  | 372   | 195  | 2.9  | 1.52 | Transcribed locus, weakly similar to NP_001048083.1 [Oryza sativa (japonica cultivar-group)]                       |
| LesAffx.52437.1.S1_at | BI925563   | TC23341  | 257  | 738   | 266  | 2.87 | 1.04 | Transcribed locus, weakly similar to NP_001044627.1 [Oryza sativa (japonica cultivar-group)]                       |
| LesAffx.58502.1.S1_at | BM412364   | TC22738  | 635  | 1781  | 1087 | 2.81 | 1.71 | Transcribed locus, weakly similar to NP_001042057.1 [Oryza sativa (japonica cultivar-group)]                       |
| LesAffx.8850.1.S1_at  | AW034398   | TC22181  | 118  | 330   | 1018 | 2.8  | 8.65 | Subtilisin-like protease                                                                                           |
| Les.423.1.S1_at       | BM409421   | TC22953  | 998  | 2794  | 1641 | 2.8  | 1.64 | CDNA, clone: FC09CF07, HTC in fruit                                                                                |
| Les.1046.1.S1_at      | X72730.1   | TC22785  | 359  | 1003  | 575  | 2.79 | 1.6  | (ERT 10) ripening-related mRNA                                                                                     |
| Les.244.2.S1_at       | AI485696   | TC22935  | 161  | 448   | 298  | 2.79 | 1.85 | Calmodulin                                                                                                         |
| LesAffx.71660.2.S1_at | AW218025   | TC24516  | 1    | 3     | 4    | 2.73 | 3.25 | ---                                                                                                                |
| LesAffx.22583.1.S1_at | AI484022   | TC23670  | 319  | 868   | 758  | 2.73 | 2.38 | Transcribed locus, weakly similar to NP_001044974.1 [Oryza sativa (japonica cultivar-group)]                       |
| LesAffx.68306.1.S1_at | BE461086   | TC23074  | 144  | 391   | 131  | 2.72 | 0.91 | Transcribed locus, weakly similar to NP_001055605.1 [Oryza sativa (japonica cultivar-group)]                       |
| Les.4341.1.A1_at      | BG626075   | TC23787  | 4    | 11    | 9    | 2.72 | 2.22 | Transcribed locus                                                                                                  |
| LesAffx.62138.1.S1_at | AW737374   | TC24364  | 107  | 288   | 251  | 2.69 | 2.34 | ---                                                                                                                |
| Les.4527.1.S1_at      | AJ635323.1 | TC22837  | 44   | 118   | 97   | 2.69 | 2.22 | polyphenol oxidase A                                                                                               |
| LesAffx.57163.2.S1_at | BI421649   | TC22802  | 621  | 1652  | 210  | 2.66 | 0.34 | Transcribed locus, weakly similar to NP_001044707.1 [Oryza sativa (japonica cultivar-group)]                       |
| Les.3693.1.S1_at      | AF426174.1 | TC22813  | 38   | 100   | 92   | 2.65 | 2.43 | blind                                                                                                              |
| Les.3645.1.S1_at      | U54770.1   | NP924378 | 926  | 2443  | 2252 | 2.64 | 2.43 | 6-deoxocastasterone oxidase                                                                                        |
| LesAffx.62232.1.S1_at | AW649113   | TC23914  | 60   | 159   | 166  | 2.64 | 2.74 | Transcribed locus, weakly similar to NP_001048167.1 [Oryza sativa (japonica cultivar-group)]                       |
| LesAffx.70522.1.S1_at | BI423015   | TC23029  | 480  | 1264  | 1366 | 2.63 | 2.85 | Transcribed locus, weakly similar to NP_001055496.1 [Oryza sativa (japonica cultivar-group)]                       |
| Les.3545.1.S1_at      | Y14809.1   | TC22310  | 1073 | 2804  | 1229 | 2.61 | 1.15 | beta-carotene hydroxylase                                                                                          |

|                       |            |         |      |      |       |      |      |                                                                                              |
|-----------------------|------------|---------|------|------|-------|------|------|----------------------------------------------------------------------------------------------|
| LesAffx.50687.1.S1_at | AI773710   | TC22384 | 514  | 1337 | 1403  | 2.6  | 2.73 | Transcribed locus, weakly similar to NP_001046905.1 [Oryza sativa (japonica cultivar-group)] |
| Les.702.1.S1_at       | BG627003   | TC21772 | 956  | 2486 | 1111  | 2.6  | 1.16 | Lycopersicon esculentum clone 134862F, mRNA sequence                                         |
| Les.1115.1.A1_at      | BG629468   | BG62946 | 12   | 31   | 28    | 2.54 | 2.29 | Transcribed locus                                                                            |
| Les.4034.1.S1_at      | AF204789.1 | BW68739 | 7    | 16   | 9     | 2.51 | 1.44 | Lycopersicon esculentum ripening regulated protein (DDTFR20) mRNA, partial sequence          |
| Les.4307.1.S1_at      | AY257487.1 | TC21819 | 3580 | 8972 | 12193 | 2.51 | 3.41 | PR5-like protein                                                                             |
| Les.3610.1.S1_at      | BG629712   | TC23477 | 53   | 133  | 238   | 2.5  | 4.47 | glycine rich protein                                                                         |
| Les.5051.1.S1_at      | BT013182.1 | TC22934 | 195  | 488  | 512   | 2.5  | 2.63 | Lycopersicon esculentum clone 134258F, mRNA sequence                                         |
| Les.3619.1.S1_at      | J04099.1   | TC23203 | 2446 | 6027 | 8095  | 2.46 | 3.31 | proteinase inhibitor I                                                                       |
| LesAffx.4116.1.S1_at  | BI933542   | TC23165 | 101  | 247  | 225   | 2.45 | 2.24 | Transcribed locus, weakly similar to NP_001047564.1 [Oryza sativa (japonica cultivar-group)] |
| LesAffx.3467.1.S1_at  | CN384781   | TC23179 | 397  | 974  | 1287  | 2.45 | 3.24 | Transcribed locus, weakly similar to NP_001047645.1 [Oryza sativa (japonica cultivar-group)] |
| Les.5126.1.S1_at      | BT013336.1 | TC22310 | 307  | 751  | 565   | 2.45 | 1.84 | Lycopersicon esculentum clone 135126R, mRNA sequence                                         |
| Les.4335.2.S1_at      | AW931003   | TC22074 | 980  | 2390 | 985   | 2.44 | 1.01 | Pathogenesis-related protein P2                                                              |
| LesAffx.20450.1.S1_at | AW223514   | TC21776 | 2363 | 5757 | 5293  | 2.44 | 2.24 | Transcribed locus, weakly similar to NP_001042868.1 [Oryza sativa (japonica cultivar-group)] |
| LesAffx.51158.2.S1_at | AI898095   | TC23014 | 30   | 73   | 62    | 2.42 | 2.06 | Transcribed locus, weakly similar to NP_001048008.1 [Oryza sativa (japonica cultivar-group)] |
| LesAffx.66953.1.S1_at | AW651552   | TC23604 | 1494 | 3608 | 4184  | 2.41 | 2.8  | Transcribed locus, weakly similar to NP_001042903.1 [Oryza sativa (japonica cultivar-group)] |
| Les.4022.1.S1_at      | X94946.1   | TC21814 | 368  | 889  | 433   | 2.41 | 1.18 | proteinase inhibitor II                                                                      |
| LesAffx.3467.1.A1_at  | CN384781   | TC23179 | 185  | 441  | 569   | 2.38 | 3.07 | Transcribed locus, weakly similar to NP_001047645.1 [Oryza sativa (japonica cultivar-group)] |
| LesAffx.66354.1.S1_at | AI773917   | TC22427 | 168  | 399  | 287   | 2.37 | 1.71 | Transcribed locus, weakly similar to NP_001057807.1 [Oryza sativa (japonica cultivar-group)] |
| Les.5152.1.S1_at      | BT013393.1 | TC24469 | 462  | 1088 | 794   | 2.36 | 1.72 | Lycopersicon esculentum clone 135647R, mRNA sequence                                         |
| Les.4443.1.A1_s_at    | BG630528   | TC21730 | 1261 | 2893 | 2623  | 2.29 | 2.08 | 6-deoxocastasterone oxidase                                                                  |
| LesAffx.37563.1.S1_at | Z70216.1   | TC23549 | 215  | 489  | 535   | 2.28 | 2.49 | ---                                                                                          |
| LesAffx.71623.1.S1_at | AW035747   | TC24095 | 1496 | 3381 | 2761  | 2.26 | 1.85 | Transcribed locus, weakly similar to NP_001041763.1 [Oryza sativa (japonica cultivar-group)] |
| LesAffx.51158.1.S1_at | AI897068   | TC23014 | 34   | 77   | 60    | 2.24 | 1.74 | Transcribed locus, weakly similar to NP_001048008.1 [Oryza sativa (japonica cultivar-group)] |
| Les.5146.1.S1_at      | BT013382.1 | AW64874 | 156  | 349  | 253   | 2.23 | 1.62 | Lycopersicon esculentum clone 135514R, mRNA sequence                                         |

|                         |            |         |      |      |      |      |      |                                                                                                                                    |
|-------------------------|------------|---------|------|------|------|------|------|------------------------------------------------------------------------------------------------------------------------------------|
| LesAffx.67592.1.S1_at   | AW093105   | TC22664 | 166  | 368  | 270  | 2.22 | 1.63 | Transcribed locus, weakly similar to NP_061135.1 (Asp-Glu-Ala-Asp) box polypeptide 43 [Homo sapiens]                               |
| Les.2899.2.S1_at        | BM536145   | TC22810 | 1702 | 3733 | 2893 | 2.19 | 1.7  | Transcribed locus, weakly similar to XP_001108862.1 cathepsin H isoform 2 [Macaca mulatta]                                         |
| Les.3716.1.S1_at        | AJ277944.1 | TC22806 | 428  | 938  | 585  | 2.19 | 1.36 | SANT/MYB domain protein                                                                                                            |
| LesAffx.64741.1.S1_at   | AI775317   | TC22074 | 1003 | 2183 | 2060 | 2.18 | 2.05 | Transcribed locus, weakly similar to XP_001103467.1 similar to 3-hydroxyisobutyryl-Coenzyme A hydrolase isoform 1 [Macaca mulatta] |
| LesAffx.24637.1.S1_at   | CN550618   | TC22796 | 166  | 361  | 710  | 2.17 | 4.26 | Transcribed locus, weakly similar to NP_001049089.1 [Oryza sativa (japonica cultivar-group)]                                       |
| LesAffx.15921.1.S1_at   | BM412286   | TC23758 | 608  | 1316 | 1384 | 2.17 | 2.28 | Transcribed locus, weakly similar to NP_001057315.1 [Oryza sativa (japonica cultivar-group)]                                       |
| LesAffx.56070.1.S1_at   | BF113259   | TC23846 | 416  | 895  | 757  | 2.15 | 1.82 | Transcribed locus, weakly similar to NP_001043915.1 [Oryza sativa (japonica cultivar-group)]                                       |
| LesAffx.49488.1.S1_at   | AI895632   | TC23120 | 329  | 709  | 336  | 2.15 | 1.02 | ---                                                                                                                                |
| LesAffx.69998.1.S1_at   | BI203963   | TC23259 | 79   | 168  | 160  | 2.14 | 2.02 | Transcribed locus, moderately similar to NP_001048806.1 [Oryza sativa (japonica cultivar-group)]                                   |
| LesAffx.124.1.S1_at     | AW443936   | TC23232 | 177  | 377  | 339  | 2.14 | 1.92 | CDNA, clone: FC20CD10, HTC in fruit                                                                                                |
| Les.2988.1.S1_at        | CK715255   | TC22567 | 1991 | 4202 | 2243 | 2.11 | 1.13 | Sucrose transporter                                                                                                                |
| Les.2353.1.A1_at        | BG629059   | TC23606 | 18   | 38   | 29   | 2.1  | 1.58 | Transcribed locus                                                                                                                  |
| Les.1431.1.A1_at        | BG631562   | TC23902 | 376  | 791  | 896  | 2.1  | 2.38 | Transcribed locus, moderately similar to NP_001043710.1 [Oryza sativa (japonica cultivar-group)]                                   |
| Les.3455.1.S1_at        | AF243040.1 | NP33401 | 5    | 11   | 9    | 2.09 | 1.75 | receptor-like protein kinase 3                                                                                                     |
| LesAffx.70722.1.S1_at   | AW030137   | TC22649 | 485  | 1011 | 370  | 2.09 | 0.76 | Transcribed locus, moderately similar to NP_001045420.1 [Oryza sativa (japonica cultivar-group)]                                   |
| Les.2667.2.S1_at        | AW621251   | TC22610 | 2065 | 4303 | 3517 | 2.08 | 1.7  | Transcribed locus, weakly similar to NP_001042221.1 [Oryza sativa (japonica cultivar-group)]                                       |
| Les.4895.1.S1_at        | BT012856.1 | TC23595 | 2087 | 4345 | 2000 | 2.08 | 0.96 | Lycopersicon esculentum clone 113942F, mRNA sequence                                                                               |
| Les.5091.1.S1_at        | BT013255.1 | TC22888 | 341  | 709  | 476  | 2.08 | 1.4  | Lycopersicon esculentum clone 134773R, mRNA sequence                                                                               |
| Les.3752.1.S1_at        | AW036285   | NP16439 | 597  | 1239 | 674  | 2.08 | 1.13 | CDNA, clone: FC23CF12, HTC in fruit                                                                                                |
| LesAffx.71065.1.S1_at   | BM413117   | TC22472 | 1421 | 2935 | 2297 | 2.07 | 1.62 | Transcribed locus, weakly similar to NP_001042582.1 [Oryza sativa (japonica cultivar-group)]                                       |
| Les.934.1.S1_at         | BG628248   | GO37331 | 1599 | 3292 | 2000 | 2.06 | 1.25 | Cell wall protein                                                                                                                  |
| LesAffx.71606.1.S1_s_at | AI896002   | TC24027 | 3258 | 6700 | 6087 | 2.06 | 1.87 | Lycopersicon esculentum clone 114334F, mRNA sequence                                                                               |
| Les.28.2.S1_a_at        | AF092654.1 | TC23972 | 61   | 125  | 69   | 2.05 | 1.13 | NRT2;1 protein                                                                                                                     |
| Les.59.1.S1_at          | AF014809.1 | TC22468 | 1736 | 3552 | 4040 | 2.05 | 2.33 | proline transporter 2                                                                                                              |
| Les.3289.1.S1_at        | AY240229.1 | TC21835 | 3049 | 6225 | 4919 | 2.04 | 1.61 | gamma-aminobutyrate transaminase subunit precursor isozyme 1                                                                       |

|                       |            |         |      |      |      |      |      |                                                                                                                               |
|-----------------------|------------|---------|------|------|------|------|------|-------------------------------------------------------------------------------------------------------------------------------|
| LesAffx.70414.1.S1_at | AW034339   | TC21936 | 1694 | 3454 | 2654 | 2.04 | 1.57 | Transcribed locus, weakly similar to NP_001045308.1 [Oryza sativa (japonica cultivar-group)]                                  |
| LesAffx.9910.1.S1_at  | CN385590   | TC22147 | 733  | 1494 | 1880 | 2.04 | 2.56 | Transcribed locus, weakly similar to NP_001046094.1 [Oryza sativa (japonica cultivar-group)]                                  |
| LesAffx.62131.1.S1_at | BE437087   | TC23252 | 1649 | 3342 | 1770 | 2.03 | 1.07 | Transcribed locus, weakly similar to XP_001081745.1 similar to threonine aldolase 1 [Rattus norvegicus]                       |
| Les.796.1.A1_at       | BG627506   | TC22633 | 675  | 1365 | 901  | 2.02 | 1.33 | Transcribed locus, weakly similar to NP_001043676.1 [Oryza sativa (japonica cultivar-group)]                                  |
| Les.5130.1.S1_at      | BT013342.1 | TC23433 | 274  | 552  | 714  | 2.02 | 2.61 | Lycopersicon esculentum clone 135145F, mRNA sequence                                                                          |
| Les.3986.1.S1_at      | AF454634.1 | TC22373 | 8    | 16   | 14   | 2.01 | 1.75 | Lycopersicon esculentum cytochrome P450 CYP74C3                                                                               |
| LesAffx.64990.1.S1_at | BI422984   | TC21791 | 542  | 1083 | 885  | 2    | 1.63 | Transcribed locus, weakly similar to NP_001051696.1 [Oryza sativa (japonica cultivar-group)]                                  |
| LesAffx.63489.1.S1_at | BI921137   | TC22082 | 555  | 1110 | 2146 | 2    | 3.87 | Transcribed locus, weakly similar to XP_001117063.1 transmembrane BAX inhibitor motif containing 4 isoform 1 [Macaca mulatta] |
|                       |            |         | 2    | 4    | 6    | 2    | 3.15 | ---                                                                                                                           |
| Les.5916.1.S1_at      | AJ715788.1 | TC23545 | 748  | 1494 | 1528 | 2    | 2.04 | anaerobic basic leucine zipper protein                                                                                        |
| Les.5177.1.S1_at      | BT013446.1 | TC24190 | 28   | 25   | 254  | 0.91 | 9.21 | Lycopersicon esculentum clone 132101F, mRNA sequence                                                                          |
| Les.5442.1.S1_at      | BT013931.1 | TC22814 | 266  | 514  | 1981 | 1.94 | 7.46 | Lycopersicon esculentum clone 132929R, mRNA sequence                                                                          |
| Les.129.1.S1_at       | AF317515.1 | TC21823 | 122  | 239  | 864  | 1.96 | 7.06 | divinyl ether synthase                                                                                                        |
| LesAffx.52594.1.S1_at | AI895802   | TC22372 | 40   | 75   | 256  | 1.86 | 6.34 | Transcribed locus, weakly similar to NP_001047179.1 [Oryza sativa (japonica cultivar-group)]                                  |
| LesAffx.3455.1.S1_at  | BI421254   | TC23177 | 149  | 262  | 697  | 1.76 | 4.67 | Transcribed locus, weakly similar to NP_001042297.1 [Oryza sativa (japonica cultivar-group)]                                  |
| LesAffx.3455.2.S1_at  | CN385030   | TC23177 | 307  | 524  | 1393 | 1.71 | 4.53 | Transcribed locus, weakly similar to NP_001042297.1 [Oryza sativa (japonica cultivar-group)]                                  |
| Les.54.1.S1_at        | AW218809   | TC22203 | 170  | 297  | 747  | 1.75 | 4.4  | PR-1a1 protein                                                                                                                |
| LesAffx.26180.1.S1_at | BG132890   | BG13289 | 159  | 295  | 660  | 1.86 | 4.15 | ---                                                                                                                           |
| Les.4317.1.S1_at      | AW625684   | TC23953 | 1266 | 2194 | 5165 | 1.73 | 4.08 | asparagine synthetase                                                                                                         |
| LesAffx.59842.1.S1_at | BI205718   | TC21823 | 45   | 34   | 174  | 0.75 | 3.89 | Transcribed locus, weakly similar to NP_001042297.1 [Oryza sativa (japonica cultivar-group)]                                  |
| Les.5934.1.S1_at      | AI895164   | TC21861 | 264  | 406  | 1020 | 1.53 | 3.86 | Transcribed locus, weakly similar to NP_001047927.1 [Oryza sativa (japonica cultivar-group)]                                  |
| Les.3735.1.S1_at      | AY007561.1 | TC22594 | 338  | 476  | 1271 | 1.41 | 3.76 | hypothetical LOC543816                                                                                                        |
| LesAffx.33082.1.S1_at | BG133383   | TC23204 | 25   | 37   | 92   | 1.5  | 3.73 | ---                                                                                                                           |
| Les.2591.1.S1_at      | M80608.1   |         | 2433 | 3930 | 9023 | 1.62 | 3.71 | beta-1,3-glucanase                                                                                                            |
| Les.1350.1.A1_at      | BG631017   | TC24319 | 93   | 82   | 342  | 0.88 | 3.68 | Transcribed locus                                                                                                             |

|                       |            |         |      |      |      |      |      |                                                                                                                                                                     |
|-----------------------|------------|---------|------|------|------|------|------|---------------------------------------------------------------------------------------------------------------------------------------------------------------------|
| LesAffx.8720.1.S1_at  | BI921446   | BI92223 | 214  | 406  | 742  | 1.9  | 3.47 | Transcribed locus, weakly similar to NP_663449.2 P450-like [Mus musculus]                                                                                           |
| LesAffx.3455.2.A1_at  | CN385030   | TC23177 | 43   | 58   | 149  | 1.34 | 3.47 | Transcribed locus, weakly similar to NP_001042297.1 [Oryza sativa (japonica cultivar-group)]                                                                        |
| Les.1.1.S1_at         | AF154421.1 | TC21715 | 1857 | 2580 | 6436 | 1.39 | 3.47 | beta-galactosidase                                                                                                                                                  |
| Les.4693.1.S1_at      | M69247.1   | TC23231 | 600  | 952  | 2061 | 1.59 | 3.44 | pathogenesis-related protein P4                                                                                                                                     |
| LesAffx.8720.2.S1_at  | AI895030   | TC22019 | 371  | 690  | 1229 | 1.86 | 3.31 | Transcribed locus, weakly similar to NP_663449.2 P450-like [Mus musculus]                                                                                           |
| Les.5917.1.S1_at      | AJ715790.1 | TC21740 | 1327 | 2449 | 4228 | 1.85 | 3.19 | 1-aminocyclopropane-1-carboxylate oxidase                                                                                                                           |
| Les.1741.1.A1_at      | BG628577   | TC24082 | 2    | 4    | 6    | 1.87 | 3.16 | Transcribed locus, weakly similar to NP_001042587.1 [Oryza sativa (japonica cultivar-group)]                                                                        |
| LesAffx.43198.1.S1_at | BF113993   | BF11399 | 163  | 295  | 511  | 1.81 | 3.13 | Transcribed locus, weakly similar to NP_001045064.1 [Oryza sativa (japonica cultivar-group)]                                                                        |
| Les.3707.1.S1_at      | AF022013.1 | TC24298 | 56   | 29   | 170  | 0.51 | 3.04 | IAA2 protein                                                                                                                                                        |
| LesAffx.59592.1.S1_at | BI210118   | TC22019 | 21   | 12   | 64   | 0.56 | 3.03 | Transcribed locus, weakly similar to NP_065956.1 dehydrogenase 14 (all-trans and 9-cis) [Homo sapiens]                                                              |
| LesAffx.59622.1.S1_at | BI210866   | TC22863 | 341  | 406  | 1018 | 1.19 | 2.99 | Transcribed locus, weakly similar to NP_565922.1 (EARLY FLOWERING 4) [Arabidopsis thaliana]                                                                         |
| LesAffx.68092.1.S1_at | BE459012   | TC22815 | 176  | 218  | 523  | 1.23 | 2.96 | Transcribed locus, weakly similar to NP_001044783.1 [Oryza sativa (japonica cultivar-group)]                                                                        |
| Les.5884.1.S1_at      | CK716273   | TC21763 | 1065 | 1944 | 3134 | 1.83 | 2.94 | Transcribed locus, weakly similar to NP_173228.1 inhibitor [Arabidopsis thaliana]                                                                                   |
| Les.3491.1.S1_at      | AF077339.1 | TC23081 | 118  | 159  | 346  | 1.35 | 2.94 | endo-1,4-beta-glucanase                                                                                                                                             |
| Les.3042.2.S1_at      | AW934591   | BE46335 | 34   | 62   | 97   | 1.85 | 2.88 | Transcribed locus, weakly similar to NP_001062055.1 [Oryza sativa (japonica cultivar-group)]                                                                        |
| Les.3683.1.S1_at      | AY093595.1 | TC24086 | 716  | 1335 | 2054 | 1.86 | 2.87 | PR-5x                                                                                                                                                               |
| Les.3625.1.S1_at      | L22188.1   | TC23715 | 289  | 200  | 785  | 0.69 | 2.72 | RSI-1 protein                                                                                                                                                       |
| Les.3706.1.S1_at      | AF022014.1 | TC21953 | 228  | 179  | 620  | 0.79 | 2.72 | IAA3 protein                                                                                                                                                        |
| Les.3575.1.S1_at      | U89256.1   | TC22509 | 99   | 156  | 267  | 1.57 | 2.7  | Pti5                                                                                                                                                                |
| Les.3583.1.A1_at      | Y15846.1   | TC22445 | 210  | 216  | 562  | 1.03 | 2.67 | TSI-1 protein                                                                                                                                                       |
| LesAffx.17387.1.S1_at | BM534931   | BM53493 | 379  | 597  | 1012 | 1.58 | 2.67 | ---                                                                                                                                                                 |
| LesAffx.22100.1.S1_at | AW216933   | TC22078 | 155  | 267  | 410  | 1.73 | 2.65 | Transcribed locus, weakly similar to XP_001061027.1 similar to Heat shock factor protein 1 (HSF 1) (Heat shock transcription factor 1) (HSTF 1) [Rattus norvegicus] |
| LesAffx.24042.1.S1_at | CN385197   | DB67876 | 696  | 1089 | 1832 | 1.56 | 2.63 | Transcribed locus, weakly similar to NP_663449.2 P450-like [Mus musculus]                                                                                           |
| LesAffx.59625.1.S1_at | BI204607   | TC22866 | 184  | 172  | 484  | 0.94 | 2.63 | Transcribed locus, weakly similar to NP_001049721.1 [Oryza sativa (japonica cultivar-group)]                                                                        |
| Les.5597.1.S1_at      | BT014226.1 | AW09450 | 46   | 40   | 120  | 0.87 | 2.63 | Lycopersicon esculentum clone 133421F, mRNA sequence                                                                                                                |
| LesAffx.32607.1.S1_at | BI206284   | TC23179 | 13   | 19   | 34   | 1.45 | 2.62 | ---                                                                                                                                                                 |

|                       |            |         |      |      |      |      |      |                                                                                                                                                            |
|-----------------------|------------|---------|------|------|------|------|------|------------------------------------------------------------------------------------------------------------------------------------------------------------|
| LesAffx.56802.1.S1_at | BI423210   | TC21932 | 859  | 1572 | 2248 | 1.83 | 2.62 | Transcribed locus, weakly similar to NP_001044900.1 [Oryza sativa (japonica cultivar-group)]                                                               |
| Les.3669.1.S1_at      | L19762.1   | TC21717 | 229  | 290  | 589  | 1.27 | 2.57 | sucrose synthase                                                                                                                                           |
| LesAffx.3253.1.S1_at  | BM412445   | TC21903 | 123  | 144  | 315  | 1.17 | 2.56 | Transcribed locus, weakly similar to XP_001091435.1 similar to cytochrome P450, family 26, subfamily A, polypeptide 1 isoform 1 isoform 3 [Macaca mulatta] |
| LesAffx.59769.1.S1_at | BI203677   | TC23621 | 798  | 1439 | 2042 | 1.8  | 2.56 | ---                                                                                                                                                        |
| LesAffx.52595.1.S1_at | AI778688   | TC22841 | 478  | 897  | 1218 | 1.88 | 2.55 | Transcribed locus, weakly similar to XP_001103792.1 ERO1-like isoform 1 [Macaca mulatta]                                                                   |
| Les.3408.1.S2_at      | Y08804.1   | TC21800 | 37   | 48   | 92   | 1.31 | 2.5  | PR protein                                                                                                                                                 |
| LesAffx.3554.1.A1_at  | CK720570   | CK72057 | 19   | 19   | 47   | 1.02 | 2.49 | ---                                                                                                                                                        |
| Les.3396.2.S1_at      | AW221386   | TC22284 | 1822 | 3009 | 4514 | 1.65 | 2.48 | Transcribed locus, weakly similar to NP_001042402.1 [Oryza sativa (japonica cultivar-group)]                                                               |
| LesAffx.31514.1.S1_at | BG127453   | TC22656 | 795  | 1155 | 1954 | 1.45 | 2.46 | Transcribed locus, weakly similar to NP_001041856.1 [Oryza sativa (japonica cultivar-group)]                                                               |
| Les.3465.1.S1_at      | AY079426.1 | TC21718 | 189  | 357  | 463  | 1.89 | 2.46 | ethylene receptor-like protein                                                                                                                             |
| LesAffx.44395.1.S1_at | BM409907   | TC22503 | 757  | 637  | 1856 | 0.84 | 2.45 | CDNA, clone: FC04BC05, HTC in fruit                                                                                                                        |
| Les.63.1.S1_at        | AF049900.1 | TC22864 | 20   | 19   | 50   | 0.93 | 2.43 | gibberellin 20-oxidase-3                                                                                                                                   |
| Les.3591.1.S1_at      | CN385613   | FS19591 | 517  | 674  | 1250 | 1.31 | 2.42 | Partial mRNA (clone SENU1)                                                                                                                                 |
| Les.3706.1.A1_at      | AF022014.1 | TC21953 | 107  | 69   | 258  | 0.64 | 2.41 | IAA3 protein                                                                                                                                               |
| Les.4346.1.S1_at      | AF020390.2 | TC21717 | 606  | 689  | 1442 | 1.14 | 2.38 | ss-galactosidase                                                                                                                                           |
| Les.4718.1.S1_at      | BT013487.1 | BI92390 | 124  | 79   | 295  | 0.63 | 2.37 | Lycopersicon esculentum clone 132171F, mRNA sequence                                                                                                       |
| LesAffx.15953.1.S1_at | AW033344   | TC23158 | 77   | 84   | 181  | 1.09 | 2.36 | Transcribed locus, weakly similar to NP_181965.1 protein [Arabidopsis thaliana]                                                                            |
| Les.4966.1.S1_at      | BT013015.1 | BF17648 | 144  | 127  | 339  | 0.88 | 2.35 | Lycopersicon esculentum clone 114253R, mRNA sequence                                                                                                       |
| Les.3700.1.S1_at      | AY026343.1 | TC22149 | 1055 | 1090 | 2478 | 1.03 | 2.35 | Lycopersicon esculentum non-symbiotic hemoglobin class 1 (Glb1)                                                                                            |
| Les.4888.1.S1_at      | BI927238   | TC24096 | 532  | 903  | 1245 | 1.7  | 2.34 | Lycopersicon esculentum clone 113905R, mRNA sequence                                                                                                       |
| LesAffx.37916.1.S1_at | BM536108   | TC23806 | 90   | 125  | 209  | 1.39 | 2.33 | Transcribed locus, weakly similar to NP_001048479.1 [Oryza sativa (japonica cultivar-group)]                                                               |
| Les.3707.1.A1_at      | AF022013.1 | TC24298 | 29   | 22   | 66   | 0.76 | 2.28 | IAA2 protein                                                                                                                                               |
| Les.3597.1.S1_at      | S40549.1   | TC22411 | 637  | 639  | 1454 | 1    | 2.28 | deoxyuridine triphosphatase                                                                                                                                |
| Les.3673.1.S1_at      | M80604.1   |         | 851  | 1187 | 1936 | 1.39 | 2.27 | beta-1,3-glucanase                                                                                                                                         |
| LesAffx.64333.1.S1_at | CN384866   | TC21750 | 2976 | 2409 | 6744 | 0.81 | 2.27 | Transcribed locus, weakly similar to NP_565383.1 protein [Arabidopsis thaliana]                                                                            |
| LesAffx.62690.1.S1_at | BI206793   | TC22770 | 449  | 764  | 1004 | 1.7  | 2.24 | Transcribed locus, weakly similar to NP_001043439.1 [Oryza sativa (japonica cultivar-group)]                                                               |
| LesAffx.62570.2.S1_at | CD003040   | TC24016 | 189  | 370  | 421  | 1.96 | 2.23 | Transcribed locus, weakly similar to NP_001044685.1 [Oryza sativa (japonica cultivar-group)]                                                               |

|                       |            |         |      |      |      |      |      |                                                                                              |
|-----------------------|------------|---------|------|------|------|------|------|----------------------------------------------------------------------------------------------|
| LesAffx.62690.2.S1_at | CD003021   | CD00302 | 882  | 1447 | 1953 | 1.64 | 2.21 | Transcribed locus, weakly similar to NP_001043439.1 [Oryza sativa (japonica cultivar-group)] |
| Les.3663.1.S1_at      | X55193.1   | TC22989 | 258  | 193  | 569  | 0.75 | 2.2  | 9612 protein                                                                                 |
| Les.909.1.A1_at       | BG628078   | TC23979 | 14   | 19   | 31   | 1.37 | 2.2  | Transcribed locus                                                                            |
| Les.5339.1.S1_at      | BT013735.1 | TC23231 | 658  | 947  | 1434 | 1.44 | 2.18 | Lycopersicon esculentum clone 132595F, mRNA sequence                                         |
| Les.1568.1.A1_at      | BG626849   | TC24275 | 18   | 28   | 40   | 1.51 | 2.18 | Transcribed locus                                                                            |
| Les.977.1.A1_at       | BG628563   | TC24335 | 3    | 6    | 7    | 1.84 | 2.17 | Transcribed locus                                                                            |
| LesAffx.68294.1.S1_at | BM408981   | TC22580 | 279  | 162  | 603  | 0.58 | 2.17 | Transcribed locus, weakly similar to NP_001046934.1 [Oryza sativa (japonica cultivar-group)] |
| Les.5855.1.S1_at      | BT014384.1 | TC22983 | 1306 | 2416 | 2823 | 1.85 | 2.16 | Lycopersicon esculentum clone 133681F, mRNA sequence                                         |
| Les.2026.1.S1_at      | BF051105   | TC22543 | 616  | 893  | 1326 | 1.45 | 2.15 | Transcribed locus, weakly similar to NP_001047542.1 [Oryza sativa (japonica cultivar-group)] |
| LesAffx.44422.1.S1_at | AW441968   | TC21789 | 388  | 634  | 831  | 1.63 | 2.14 | Transcribed locus, weakly similar to NP_001041874.1 [Oryza sativa (japonica cultivar-group)] |
| LesAffx.3059.1.S1_at  | AI776626   | AI77662 | 25   | 48   | 52   | 1.94 | 2.13 | ---                                                                                          |
| LesAffx.15986.1.S1_at | CK715617   | TC23538 | 67   | 107  | 142  | 1.61 | 2.13 | Transcribed locus, weakly similar to XP_001116334.1 myo-inositol oxygenase [Macaca mulatta]  |
| Les.1606.1.S1_at      | BG627189   | TC23013 | 1498 | 1601 | 3188 | 1.07 | 2.13 | Lycopersicon esculentum clone 114287R, mRNA sequence                                         |
| Les.2643.1.S1_at      | BG128842   | TC23690 | 238  | 284  | 503  | 1.2  | 2.12 | Transcribed locus                                                                            |
| LesAffx.1695.1.S1_at  | BE435747   | TC21794 | 101  | 115  | 210  | 1.14 | 2.09 | Transcribed locus, weakly similar to NP_001042242.1 [Oryza sativa (japonica cultivar-group)] |
| LesAffx.735.1.S1_at   | AW217158   | TC22685 | 232  | 451  | 485  | 1.94 | 2.09 | Transcribed locus, weakly similar to NP_001042221.1 [Oryza sativa (japonica cultivar-group)] |
| LesAffx.3554.1.S1_at  | CK720570   | CK72057 | 16   | 20   | 33   | 1.26 | 2.09 | ---                                                                                          |
| Les.288.1.S1_at       | BM410927   | TC23438 | 63   | 91   | 132  | 1.44 | 2.08 | NAC domain protein                                                                           |
| LesAffx.52960.1.S1_at | BI207845   | TC23617 | 286  | 460  | 593  | 1.61 | 2.07 | ---                                                                                          |
| LesAffx.24696.1.S1_at | AW034874   | DB70637 | 105  | 55   | 216  | 0.52 | 2.05 | Transcribed locus, weakly similar to NP_001043378.1 [Oryza sativa (japonica cultivar-group)] |
| LesAffx.56137.1.A1_at | AI490099   | TC22599 | 47   | 55   | 97   | 1.15 | 2.04 | Transcribed locus, weakly similar to NP_001041909.1 [Oryza sativa (japonica cultivar-group)] |
| LesAffx.18686.1.S1_at | BI203812   | TC22685 | 52   | 77   | 107  | 1.48 | 2.04 | Transcribed locus, weakly similar to NP_001043492.1 [Oryza sativa (japonica cultivar-group)] |
| LesAffx.62690.2.A1_at | CD003021   | CD00302 | 263  | 406  | 534  | 1.54 | 2.03 | Transcribed locus, weakly similar to NP_001043439.1 [Oryza sativa (japonica cultivar-group)] |
| Les.220.1.S1_at       | CK716059   | TC21926 | 2468 | 3955 | 5008 | 1.6  | 2.03 | Transcribed locus, weakly similar to NP_001055699.1 [Oryza sativa (japonica cultivar-group)] |



|                       |            |         |      |      |      |      |      |                                                                                                              |
|-----------------------|------------|---------|------|------|------|------|------|--------------------------------------------------------------------------------------------------------------|
| LesAffx.69783.1.S1_at | AW220917   | TC23448 | 1140 | 2235 | 2307 | 1.96 | 2.02 | Transcribed locus, weakly similar to NP_001067067.1 [Oryza sativa (japonica cultivar-group)]                 |
| Les.797.1.S1_at       | X92854.1   | TC24488 | 721  | 1070 | 1454 | 1.48 | 2.02 | Exon 1 of AMT1 gene                                                                                          |
| Les.5567.1.S1_at      | BT014164.1 | TC22700 | 629  | 558  | 1263 | 0.89 | 2.01 | Lycopersicon esculentum clone 133286F, mRNA sequence                                                         |
| LesAffx.60369.1.S1_at | BG130091   | TC22835 | 1091 | 1444 | 2189 | 1.32 | 2.01 | Transcribed locus, moderately similar to NP_001064827.1 [Oryza sativa (japonica cultivar-group)]             |
| Les.2137.1.S1_at      | AY359965.1 | TC21714 | 1033 | 1480 | 2072 | 1.43 | 2.01 | EIX receptor 1                                                                                               |
| LesAffx.38395.2.S1_at | AI488594   | AI48859 | 197  | 250  | 395  | 1.27 | 2    | ---                                                                                                          |
| Les.2832.1.S1_at      | CN384480   | TC21748 | 1542 | 1268 | 3086 | 0.82 | 2    | peroxidase                                                                                                   |
| Les.4493.1.S1_at      | BG734807   | TC22690 | 3276 | 2959 | 1653 | 0.9  | 0.5  | ADP/ATP translocator                                                                                         |
| Les.4488.1.S1_at      | BG628643   | TC22827 | 6203 | 5929 | 3128 | 0.96 | 0.5  | threonine deaminase                                                                                          |
| Les.5493.1.S1_at      | BT014016.1 | AW62178 | 420  | 408  | 211  | 0.97 | 0.5  | Lycopersicon esculentum clone 133078F, mRNA sequence                                                         |
| Les.2024.2.S1_at      | BG642995   | AI48435 | 1207 | 914  | 607  | 0.76 | 0.5  | Transcribed locus, weakly similar to XP_001105201.1 fructose-1,6-bisphosphatase 1 isoform 1 [Macaca mulatta] |
| LesAffx.68320.1.S1_at | BM535633   | ES89343 | 1170 | 1234 | 588  | 1.05 | 0.5  | Transcribed locus, weakly similar to NP_001065587.1 [Oryza sativa (japonica cultivar-group)]                 |
| LesAffx.16884.1.S1_at | BI421819   | TC21771 | 7226 | 6474 | 3632 | 0.9  | 0.5  | Metallothionein-like protein                                                                                 |
| Les.3085.1.S1_at      | BM413323   | TC22204 | 1583 | 1529 | 793  | 0.97 | 0.5  | Transcribed locus, weakly similar to NP_001042186.1 [Oryza sativa (japonica cultivar-group)]                 |
| Les.1603.1.A1_at      | BG630194   | TC23278 | 213  | 147  | 107  | 0.69 | 0.5  | Transcribed locus, weakly similar to NP_001043493.1 [Oryza sativa (japonica cultivar-group)]                 |
| Les.3409.1.A1_at      | BG735108   | GO37597 | 4196 | 2804 | 2095 | 0.67 | 0.5  | Transcribed locus, weakly similar to NP_001044764.1 [Oryza sativa (japonica cultivar-group)]                 |
| Les.3594.1.S1_at      | Z47980.1   | TC21807 | 3702 | 2322 | 1842 | 0.63 | 0.5  | hypothetical LOC544160                                                                                       |
| LesAffx.3394.1.S1_at  | BT013543.1 | TC23598 | 2019 | 1303 | 1002 | 0.65 | 0.5  | ---                                                                                                          |
| LesAffx.66600.1.S1_at | AW040689   | TC23173 | 1918 | 1709 | 952  | 0.89 | 0.5  | Transcribed locus, moderately similar to NP_001045167.1 [Oryza sativa (japonica cultivar-group)]             |
| Les.4459.1.S1_s_at    | X99148.1   | ES89373 | 2038 | 1245 | 1010 | 0.61 | 0.5  | hypothetical LOC544160 /// arabinogalactan                                                                   |
| Les.3983.1.S1_at      | U20591.1   | TC23477 | 65   | 50   | 32   | 0.77 | 0.49 | flower-specific gamma-thionin-like protein/acidic protein precursor                                          |
| LesAffx.53966.1.S1_at | AY026037.1 | TC23466 | 2000 | 1783 | 987  | 0.89 | 0.49 | ---                                                                                                          |
| Les.3550.1.S1_at      | AF096251.1 | TC24195 | 363  | 361  | 179  | 0.99 | 0.49 | ethylene-responsive heat shock protein cognate 70                                                            |
| Les.3175.1.S1_at      | BG626608   | TC23958 | 3901 | 2879 | 1908 | 0.74 | 0.49 | Lycopersicon esculentum clone 132976F, mRNA sequence                                                         |
| LesAffx.29801.1.S1_at | AI489456   | TC23187 | 4574 | 5597 | 2234 | 1.22 | 0.49 | Transcribed locus, weakly similar to NP_001042186.1 [Oryza sativa (japonica cultivar-group)]                 |
| Les.608.1.S1_at       | BG628276   | TC21796 | 6221 | 5262 | 3033 | 0.85 | 0.49 | Lycopersicon esculentum clone 133776F, mRNA sequence                                                         |
| Les.3123.1.S1_at      | BT013406.1 | TC23016 | 3147 | 2078 | 1531 | 0.66 | 0.49 | Lycopersicon esculentum clone 135721R, mRNA sequence                                                         |

|                       |            |         |      |      |      |      |      |                                                                                                                     |
|-----------------------|------------|---------|------|------|------|------|------|---------------------------------------------------------------------------------------------------------------------|
| LesAffx.55629.1.S1_at | BM412122   | TC22287 | 391  | 451  | 190  | 1.15 | 0.49 | Transcribed locus, weakly similar to NP_001044052.1 [Oryza sativa (japonica cultivar-group)]                        |
| Les.2060.1.A1_at      | BG631361   | BG63136 | 7    | 9    | 3    | 1.37 | 0.49 | Transcribed locus, weakly similar to NP_001054945.1 [Oryza sativa (japonica cultivar-group)]                        |
| LesAffx.62950.1.S1_at | AI490601   | TC23296 | 549  | 577  | 266  | 1.05 | 0.48 | Transcribed locus, weakly similar to XP_001104086.1 similar to UDP-galactose-4-epimerase isoform 2 [Macaca mulatta] |
| Les.3593.1.S1_at      | BT012763.1 | TC23407 | 3718 | 3180 | 1800 | 0.86 | 0.48 | TAS14 peptide (AA 1-130)                                                                                            |
| LesAffx.65029.1.S1_at | AJ785063   | TC22116 | 1483 | 1465 | 718  | 0.99 | 0.48 | Transcribed locus, weakly similar to NP_001058029.1 [Oryza sativa (japonica cultivar-group)]                        |
| Les.2620.1.S1_at      | BG631075   | AW44264 | 1185 | 965  | 573  | 0.81 | 0.48 | Transcribed locus, weakly similar to NP_001044402.1 [Oryza sativa (japonica cultivar-group)]                        |
| Les.3180.2.S1_at      | AI775197   | TC22419 | 367  | 267  | 177  | 0.73 | 0.48 | Transcribed locus, weakly similar to NP_001048006.1 [Oryza sativa (japonica cultivar-group)]                        |
| Les.3664.1.S1_at      | U20590.1   | TC22651 | 965  | 583  | 464  | 0.6  | 0.48 | endo-1,4-beta-glucanase precursor                                                                                   |
| LesAffx.64062.1.S1_at | AW040768   | TC22080 | 114  | 84   | 55   | 0.73 | 0.48 | Transcribed locus, weakly similar to NP_001042589.1 [Oryza sativa (japonica cultivar-group)]                        |
| LesAffx.30938.1.S1_at | AJ785088   | TC22113 | 430  | 259  | 204  | 0.6  | 0.47 | Transcribed locus, weakly similar to NP_001042177.1 [Oryza sativa (japonica cultivar-group)]                        |
| Les.2909.1.S1_at      | AW223174   | TC24474 | 2329 | 1636 | 1106 | 0.7  | 0.47 | Transcribed locus, weakly similar to NP_001041799.1 [Oryza sativa (japonica cultivar-group)]                        |
| LesAffx.64062.2.S1_at | BG129043   | TC22887 | 717  | 793  | 340  | 1.11 | 0.47 | Transcribed locus, moderately similar to NP_001044143.1 [Oryza sativa (japonica cultivar-group)]                    |
| Les.641.1.S1_at       | BG626664   | TC23339 | 1329 | 689  | 630  | 0.52 | 0.47 | Lycopersicon esculentum clone 132316F, mRNA sequence                                                                |
| Les.5096.1.S1_at      | BT013271.1 | TC22616 | 159  | 316  | 75   | 1.99 | 0.47 | Lycopersicon esculentum clone 134844R, mRNA sequence                                                                |
| Les.513.1.S1_at       | BG626001   | TC22866 | 374  | 240  | 177  | 0.64 | 0.47 | Lycopersicon esculentum clone 132360F, mRNA sequence                                                                |
| LesAffx.66331.1.S1_at | BI421673   | TC21932 | 196  | 222  | 93   | 1.13 | 0.47 | Transcribed locus, weakly similar to NP_001056463.1 [Oryza sativa (japonica cultivar-group)]                        |
| Les.1596.1.A1_at      | BG627098   | TC23373 | 2237 | 2269 | 1054 | 1.01 | 0.47 | Transcribed locus, moderately similar to NP_001051136.1 [Oryza sativa (japonica cultivar-group)]                    |
| Les.3140.1.S1_at      | BG628034   | TC24291 | 2856 | 2987 | 1341 | 1.05 | 0.47 | Transcribed locus, weakly similar to XP_001088834.1 acetyl-Coenzyme A acyltransferase 1 isoform 2 [Macaca mulatta]  |
| Les.3234.1.A1_at      | BG735047   | TC23423 | 4021 | 4469 | 1887 | 1.11 | 0.47 | Metalloprotease inhibitor                                                                                           |
| LesAffx.30938.1.A1_at | AJ785088   | TC22113 | 186  | 114  | 87   | 0.61 | 0.47 | Transcribed locus, weakly similar to NP_001042177.1 [Oryza sativa (japonica cultivar-group)]                        |
| LesAffx.65029.1.A1_at | AJ785063   | TC22116 | 576  | 482  | 270  | 0.84 | 0.47 | Transcribed locus, weakly similar to NP_001058029.1 [Oryza sativa (japonica cultivar-group)]                        |

|                       |            |         |      |      |      |      |      |                                                                                                                                       |
|-----------------------|------------|---------|------|------|------|------|------|---------------------------------------------------------------------------------------------------------------------------------------|
| LesAffx.66600.1.A1_at | AW036163   | TC23173 | 870  | 722  | 406  | 0.83 | 0.47 | Transcribed locus, moderately similar to NP_001045167.1 [Oryza sativa (japonica cultivar-group)]                                      |
| Les.4944.1.S1_at      | BT012955.1 | TC22653 | 130  | 82   | 61   | 0.63 | 0.47 | Lycopersicon esculentum clone 114142R, mRNA sequence                                                                                  |
| Les.3062.2.S1_at      | AI782456   | TC23728 | 717  | 503  | 334  | 0.7  | 0.47 | Transcribed locus, weakly similar to NP_001043493.1 [Oryza sativa (japonica cultivar-group)]                                          |
| LesAffx.41703.1.S1_at | BG352060   | TC23987 | 267  | 246  | 124  | 0.92 | 0.47 | Transcribed locus, moderately similar to NP_001062462.1 [Oryza sativa (japonica cultivar-group)]                                      |
| LesAffx.38499.1.A1_at | BI209699   | TC22324 | 572  | 331  | 266  | 0.58 | 0.47 | Transcribed locus, moderately similar to NP_001044017.1 [Oryza sativa (japonica cultivar-group)]                                      |
| Les.2418.1.S1_at      | BG735381   | BG73538 | 357  | 374  | 166  | 1.05 | 0.46 | Transcribed locus                                                                                                                     |
| Les.2703.1.S1_at      | BG735318   | TC23293 | 2018 | 1114 | 936  | 0.55 | 0.46 | Lycopersicon esculentum clone 132109R, mRNA sequence                                                                                  |
| Les.4849.1.S1_at      | BT012755.1 | TC21877 | 1190 | 1118 | 550  | 0.94 | 0.46 | Lycopersicon esculentum clone 113699R, mRNA sequence                                                                                  |
| LesAffx.46085.1.S1_at | AW928724   | TC22038 | 276  | 147  | 127  | 0.53 | 0.46 | Transcribed locus, weakly similar to XP_001114240.1 cytochrome P450, family 21, subfamily A, polypeptide 2 isoform 3 [Macaca mulatta] |
| Les.490.1.A1_at       | BG625891   | TC22945 | 315  | 252  | 145  | 0.8  | 0.46 | Transcribed locus, weakly similar to XP_001108145.1 similar to nucleotide binding protein-like [Macaca mulatta]                       |
| Les.5437.1.S1_at      | CK715969   | TC24035 | 1259 | 849  | 579  | 0.67 | 0.46 | Lycopersicon esculentum clone 132916F, mRNA sequence                                                                                  |
| LesAffx.41333.2.S1_at | AW934014   | TC23167 | 295  | 266  | 136  | 0.9  | 0.46 | Transcribed locus, weakly similar to XP_001111662.1 protein phosphatase 1B isoform 6 [Macaca mulatta]                                 |
| LesAffx.41703.1.A1_at | BG352060   | TC23987 | 1183 | 1239 | 543  | 1.05 | 0.46 | Transcribed locus, moderately similar to NP_001062462.1 [Oryza sativa (japonica cultivar-group)]                                      |
| Les.4492.1.S1_at      | BG628012   | TC21878 | 674  | 488  | 309  | 0.72 | 0.46 | Transcribed locus, weakly similar to XP_001111095.1 aldolase B isoform 5 [Macaca mulatta]                                             |
| Les.2934.2.S1_at      | BG128445   | TC22376 | 399  | 338  | 183  | 0.85 | 0.46 | Transcribed locus, weakly similar to NP_001046132.1 [Oryza sativa (japonica cultivar-group)]                                          |
| Les.3266.3.S1_at      | BI935106   | TC22577 | 1982 | 2079 | 904  | 1.05 | 0.46 | Transcribed locus, moderately similar to NP_001047794.1 [Oryza sativa (japonica cultivar-group)]                                      |
| LesAffx.16291.2.S1_at | AW040554   | TC24065 | 540  | 473  | 245  | 0.88 | 0.45 | Transcribed locus, moderately similar to NP_001050499.1 [Oryza sativa (japonica cultivar-group)]                                      |
| Les.3180.3.A1_at      | BG734557   | TC23323 | 1277 | 941  | 580  | 0.74 | 0.45 | Transcribed locus, weakly similar to NP_001048006.1 [Oryza sativa (japonica cultivar-group)]                                          |
| Les.3372.1.S1_at      | BG631141   | TC23249 | 2066 | 1064 | 935  | 0.52 | 0.45 | Lycopersicon esculentum clone 132813R, mRNA sequence                                                                                  |
| Les.3924.1.S1_at      | BE433308   | TC23702 | 5683 | 5622 | 2559 | 0.99 | 0.45 | Hypothetical protein LOC778199                                                                                                        |
| LesAffx.8708.1.S1_at  | AW033860   | AW03386 | 82   | 54   | 37   | 0.65 | 0.45 | ---                                                                                                                                   |
| Les.314.1.A1_at       | CK715040   | TC22072 | 1712 | 1137 | 769  | 0.66 | 0.45 | Transcribed locus, weakly similar to XP_001084411.1 aquaporin 1 [Macaca mulatta]                                                      |
| LesAffx.23510.1.S1_at | AI772286   | TC23430 | 102  | 82   | 46   | 0.8  | 0.45 | Transcribed locus                                                                                                                     |

|                       |            |         |      |      |      |      |      |                                                                                                                    |
|-----------------------|------------|---------|------|------|------|------|------|--------------------------------------------------------------------------------------------------------------------|
| Les.4492.2.S1_at      | CK714954   | TC22356 | 4903 | 3832 | 2196 | 0.78 | 0.45 | Transcribed locus, weakly similar to XP_001111095.1 aldolase B isoform 5 [Macaca mulatta]                          |
| Les.3210.2.A1_at      | AJ320060   | TC22662 | 1665 | 1737 | 742  | 1.04 | 0.45 | Transcribed locus                                                                                                  |
| Les.3113.1.S1_at      | BG131753   | TC21889 | 329  | 315  | 146  | 0.96 | 0.44 | Transcribed locus, weakly similar to XP_001101334.1 sterol-C4-methyl oxidase-like isoform 1 [Macaca mulatta]       |
| LesAffx.26471.2.S1_at | AW218197   | TC22883 | 36   | 20   | 16   | 0.55 | 0.44 | Transcribed locus, weakly similar to NP_001054088.1 [Oryza sativa (japonica cultivar-group)]                       |
| Les.2964.2.S1_at      | BI923596   | TC22145 | 308  | 350  | 136  | 1.13 | 0.44 | Transcribed locus, weakly similar to NP_001042324.1 [Oryza sativa (japonica cultivar-group)]                       |
| Les.3119.1.A1_at      | AW037265   | TC23253 | 585  | 631  | 259  | 1.08 | 0.44 | Transcribed locus, weakly similar to XP_001094505.1 proteasome 26S non-ATPase subunit 3 isoform 4 [Macaca mulatta] |
| Les.1123.1.A1_at      | BG629518   | BG62951 | 50   | 34   | 22   | 0.69 | 0.44 | Transcribed locus                                                                                                  |
| Les.4259.1.S1_at      | BG629037   | TC24424 | 4419 | 3194 | 1954 | 0.72 | 0.44 | Transcribed locus, weakly similar to XP_001082599.1 cysteine and glycine-rich protein 2 [Macaca mulatta]           |
| Les.672.1.S1_at       | BM536270   | TC22195 | 695  | 498  | 306  | 0.72 | 0.44 | Transcribed locus, weakly similar to NP_001042227.1 [Oryza sativa (japonica cultivar-group)]                       |
| Les.2809.1.S1_at      | BT014540.1 | TC24080 | 956  | 870  | 417  | 0.91 | 0.44 | Lycopersicon esculentum clone 133955F, mRNA sequence                                                               |
| LesAffx.18330.1.S1_at | BG129699   | TC24342 | 789  | 641  | 344  | 0.81 | 0.44 | Transcribed locus, weakly similar to NP_001046074.1 [Oryza sativa (japonica cultivar-group)]                       |
| Les.70.1.S1_at        | AF000141.1 | NP00014 | 1980 | 1011 | 857  | 0.51 | 0.43 | class I knotted-like homeodomain protein                                                                           |
| Les.3210.1.S1_at      | AI483637   | TC22662 | 1167 | 1308 | 503  | 1.12 | 0.43 | Transcribed locus                                                                                                  |
| Les.1157.1.A1_at      | BG629717   | BG62971 | 101  | 83   | 43   | 0.82 | 0.43 | Transcribed locus                                                                                                  |
| LesAffx.29801.1.A1_at | AI489456   | TC23187 | 302  | 310  | 129  | 1.03 | 0.43 | Transcribed locus, weakly similar to NP_001042186.1 [Oryza sativa (japonica cultivar-group)]                       |
| Les.3330.3.A1_at      | BG629064   | TC24355 | 3175 | 1761 | 1357 | 0.55 | 0.43 | Transcribed locus, weakly similar to NP_001044764.1 [Oryza sativa (japonica cultivar-group)]                       |
| Les.3409.2.S1_at      | BF050508   | TC21920 | 2577 | 1466 | 1099 | 0.57 | 0.43 | Transcribed locus, weakly similar to NP_001044764.1 [Oryza sativa (japonica cultivar-group)]                       |
| Les.3166.1.S1_at      | AI775188   | TC23957 | 129  | 124  | 55   | 0.96 | 0.42 | Transcribed locus, weakly similar to NP_001047732.1 [Oryza sativa (japonica cultivar-group)]                       |
| Les.110.1.S1_at       | AF154423.1 | TC22330 | 1588 | 871  | 673  | 0.55 | 0.42 | TBG5 protein                                                                                                       |
| LesAffx.64540.1.S1_at | AW441832   | TC22052 | 1279 | 1349 | 541  | 1.05 | 0.42 | Transcribed locus, moderately similar to NP_001053805.1 [Oryza sativa (japonica cultivar-group)]                   |
| LesAffx.21101.1.S1_at | BI924446   | TC21935 | 153  | 108  | 64   | 0.71 | 0.42 | Transcribed locus, weakly similar to NP_001047732.1 [Oryza sativa (japonica cultivar-group)]                       |
| Les.3741.1.S1_at      | AF146691.1 | TC23195 | 1940 | 2543 | 815  | 1.31 | 0.42 | Eli3 protein                                                                                                       |

|                       |            |         |      |      |      |      |      |                                                                                                                               |
|-----------------------|------------|---------|------|------|------|------|------|-------------------------------------------------------------------------------------------------------------------------------|
| Les.3113.2.S1_at      | AI780108   | FS20183 | 295  | 271  | 123  | 0.92 | 0.42 | Transcribed locus, weakly similar to XP_001101334.1 sterol-C4-methyl oxidase-like isoform 1 [Macaca mulatta]                  |
| Les.3741.1.A1_at      | AF146691.1 | TC23195 | 816  | 936  | 339  | 1.15 | 0.42 | Eli3 protein                                                                                                                  |
| Les.1923.1.S1_at      | BG630193   | TC23497 | 334  | 268  | 138  | 0.8  | 0.41 | Transcribed locus, moderately similar to NP_001066340.1 [Oryza sativa (japonica cultivar-group)]                              |
| Les.3119.3.S1_at      | AW092353   | TC23253 | 687  | 753  | 284  | 1.1  | 0.41 | Transcribed locus, weakly similar to XP_001094505.1 proteasome 26S non-ATPase subunit 3 isoform 4 [Macaca mulatta]            |
| Les.1936.1.S1_at      | BG626997   | TC21753 | 1899 | 2626 | 783  | 1.38 | 0.41 | Lycopersicon esculentum clone 133556R, mRNA sequence                                                                          |
| LesAffx.14110.2.S1_at | AW932597   | TC23949 | 1232 | 806  | 507  | 0.65 | 0.41 | Transcribed locus, weakly similar to NP_001042660.1 [Oryza sativa (japonica cultivar-group)]                                  |
| Les.3119.2.S1_at      | BI927792   | TC23253 | 389  | 413  | 160  | 1.06 | 0.41 | Transcribed locus, weakly similar to XP_001094505.1 proteasome 26S non-ATPase subunit 3 isoform 4 [Macaca mulatta]            |
| Les.3330.2.S1_at      | BE458823   | TC24355 | 3030 | 1675 | 1239 | 0.55 | 0.41 | Transcribed locus, weakly similar to NP_001044764.1 [Oryza sativa (japonica cultivar-group)]                                  |
| LesAffx.14110.2.A1_at | AW932597   | TC23949 | 197  | 111  | 80   | 0.56 | 0.41 | Transcribed locus, weakly similar to NP_001042660.1 [Oryza sativa (japonica cultivar-group)]                                  |
| Les.2415.2.S1_at      | BE431455   | TC23842 | 1246 | 875  | 508  | 0.7  | 0.41 | Transcribed locus, moderately similar to NP_001061906.1 [Oryza sativa (japonica cultivar-group)]                              |
| Les.424.2.S1_at       | AI776305   | TC22847 | 2404 | 2043 | 979  | 0.85 | 0.41 | Transcribed locus, weakly similar to NP_001041744.1 [Oryza sativa (japonica cultivar-group)]                                  |
| LesAffx.37588.1.S1_at | BG124246   | TC21902 | 84   | 76   | 34   | 0.9  | 0.41 | Transcribed locus, weakly similar to NP_001046132.1 [Oryza sativa (japonica cultivar-group)]                                  |
| Les.1478.1.S1_at      | BG631500   | TC23304 | 1377 | 1168 | 559  | 0.85 | 0.41 | Lycopersicon esculentum clone 114252R, mRNA sequence                                                                          |
| Les.3668.1.S1_at      | U09026.1   | TC21838 | 963  | 763  | 391  | 0.79 | 0.41 | lipoygenase                                                                                                                   |
| Les.2131.2.S1_at      | BE433043   | TC22249 | 2227 | 2245 | 902  | 1.01 | 0.4  | Transcribed locus, weakly similar to NP_001050262.1 [Oryza sativa (japonica cultivar-group)]                                  |
| Les.4412.1.A1_at      | BG627732   | TC23503 | 1188 | 776  | 481  | 0.65 | 0.4  | Transcribed locus, weakly similar to NP_001042986.1 [Oryza sativa (japonica cultivar-group)]                                  |
| Les.1784.1.S1_at      | BI931777   | TC24140 | 2189 | 1361 | 884  | 0.62 | 0.4  | Transcribed locus, weakly similar to XP_001118335.1 similar to intestinal facilitative glucose transporter 7 [Macaca mulatta] |
| LesAffx.21904.1.S1_at | BM536146   | TC23302 | 340  | 262  | 137  | 0.77 | 0.4  | Transcribed locus, weakly similar to NP_001048363.1 [Oryza sativa (japonica cultivar-group)]                                  |
| LesAffx.34986.1.A1_at | CK715664   | TC23304 | 1182 | 925  | 476  | 0.78 | 0.4  | Transcribed locus, weakly similar to NP_001048569.1 [Oryza sativa (japonica cultivar-group)]                                  |
| Les.424.1.S1_at       | BG628349   | TC22847 | 2534 | 2327 | 1017 | 0.92 | 0.4  | Transcribed locus, weakly similar to NP_001041744.1 [Oryza sativa (japonica cultivar-group)]                                  |

|                       |            |         |      |      |      |      |      |                                                                                                                           |
|-----------------------|------------|---------|------|------|------|------|------|---------------------------------------------------------------------------------------------------------------------------|
| Les.5864.1.S1_at      | U20596.1   | TC23921 | 7593 | 6045 | 3047 | 0.8  | 0.4  | hypothetical LOC544002                                                                                                    |
| Les.4008.1.S1_a_at    | BG630151   | TC21741 | 5134 | 3170 | 2042 | 0.62 | 0.4  | xyloglucan endotransglycosylase/hydrolase 16 protein                                                                      |
| Les.3995.1.S1_at      | AW443014   | TC21771 | 3091 | 2024 | 1226 | 0.65 | 0.4  | methionine rich arabinogalactan                                                                                           |
| Les.2038.1.A1_at      | BG631023   | TC23348 | 889  | 741  | 351  | 0.83 | 0.4  | Transcribed locus, weakly similar to NP_199407.1 ester hydrolase/ hydrolase, acting on ester bonds [Arabidopsis thaliana] |
| LesAffx.81.2.S1_at    | AW648752   | TC22482 | 3290 | 2900 | 1300 | 0.88 | 0.39 | Transcribed locus, weakly similar to XP_001090175.1 hypothetical protein LOC51507 isoform 2 [Macaca mulatta]              |
| Les.2415.3.A1_at      | BG735370   | TC23842 | 1780 | 1341 | 701  | 0.75 | 0.39 | Transcribed locus, moderately similar to NP_001061906.1 [Oryza sativa (japonica cultivar-group)]                          |
| LesAffx.20929.1.S1_at | BI206813   | TC23621 | 308  | 207  | 121  | 0.67 | 0.39 | Transcribed locus, weakly similar to NP_001051650.1 [Oryza sativa (japonica cultivar-group)]                              |
| Les.4359.1.S1_at      | BE462878   | TC23326 | 427  | 273  | 167  | 0.64 | 0.39 | Pathogenesis-related protein P2                                                                                           |
| Les.2063.1.A1_at      | BG631371   | TC24473 | 63   | 47   | 24   | 0.75 | 0.39 | Transcribed locus                                                                                                         |
| Les.3330.1.S1_at      | AW650121   | TC24355 | 1650 | 937  | 644  | 0.57 | 0.39 | Transcribed locus, weakly similar to NP_001044764.1 [Oryza sativa (japonica cultivar-group)]                              |
| Les.314.2.S1_at       | AW217816   | BG64268 | 1773 | 1073 | 690  | 0.61 | 0.39 | Transcribed locus, weakly similar to XP_001084411.1 aquaporin 1 [Macaca mulatta]                                          |
| Les.861.1.A1_at       | BG627791   | TC23388 | 229  | 238  | 89   | 1.04 | 0.39 | Transcribed locus, moderately similar to NP_001065502.1 [Oryza sativa (japonica cultivar-group)]                          |
| Les.349.1.S1_at       | CN385641   | TC23560 | 279  | 259  | 108  | 0.93 | 0.39 | Transcribed locus                                                                                                         |
| Les.953.2.A1_at       | BG628368   | TC22566 | 18   | 19   | 7    | 1.03 | 0.39 | Transcribed locus, weakly similar to XP_001113968.1 similar to solute carrier family 35, member E1 [Macaca mulatta]       |
| Les.790.1.A1_at       | BG627458   | TC23127 | 241  | 163  | 93   | 0.68 | 0.39 | Transcribed locus, weakly similar to NP_001052896.1 [Oryza sativa (japonica cultivar-group)]                              |
| Les.4835.1.S1_at      | BT012722.1 | TC24498 | 444  | 255  | 171  | 0.58 | 0.39 | Lycopersicon esculentum clone 113649F, mRNA sequence                                                                      |
| Les.3273.1.S1_at      | BG627786   | TC24518 | 918  | 1171 | 353  | 1.28 | 0.39 | proline rich protein                                                                                                      |
| Les.2131.1.A1_at      | BG627099   | TC22249 | 2151 | 2123 | 825  | 0.99 | 0.38 | Transcribed locus, weakly similar to NP_001050262.1 [Oryza sativa (japonica cultivar-group)]                              |
| Les.3210.2.A1_a_at    | AJ320060   | TC22662 | 634  | 630  | 243  | 0.99 | 0.38 | Transcribed locus                                                                                                         |
| Les.2933.1.S1_at      | BT012764.1 | TC23454 | 2322 | 1680 | 889  | 0.72 | 0.38 | Lycopersicon esculentum clone 113710R, mRNA sequence                                                                      |
| Les.4522.1.S1_at      | AY497477.1 | TC23773 | 2638 | 2835 | 1009 | 1.07 | 0.38 | xyloglucan endotransglucosylase-hydrolase XTH6                                                                            |
| Les.3073.1.S1_at      | AJ785415   | TC21760 | 436  | 443  | 166  | 1.02 | 0.38 | Fruit-ripening protein                                                                                                    |
| Les.3322.2.S1_at      | AW091831   | TC22662 | 756  | 455  | 288  | 0.6  | 0.38 | Transcribed locus, moderately similar to NP_001047599.1 [Oryza sativa (japonica cultivar-group)]                          |
| Les.4617.1.S1_at      | BT014212.1 | TC23312 | 1620 | 1409 | 617  | 0.87 | 0.38 | Lycopersicon esculentum clone 133389F, mRNA sequence                                                                      |
| Les.4291.2.S1_at      | AW649205   | TC22682 | 3119 | 2421 | 1185 | 0.78 | 0.38 | Transcribed locus, weakly similar to NP_001044127.1 [Oryza sativa (japonica cultivar-group)]                              |

|                       |            |         |      |      |      |      |      |                                                                                                                               |
|-----------------------|------------|---------|------|------|------|------|------|-------------------------------------------------------------------------------------------------------------------------------|
| Les.4291.1.S1_at      | BI934076   | TC22682 | 2435 | 1926 | 921  | 0.79 | 0.38 | Transcribed locus, weakly similar to NP_001044127.1 [Oryza sativa (japonica cultivar-group)]                                  |
| Les.2971.2.A1_at      | BG629234   | TC23191 | 5983 | 6106 | 2236 | 1.02 | 0.37 | Wound-induced proteinase inhibitor I prepropeptide                                                                            |
| Les.375.1.A1_at       | BG734771   | TC22710 | 1350 | 1093 | 503  | 0.81 | 0.37 | Transcribed locus, weakly similar to NP_565660.1 protein [Arabidopsis thaliana]                                               |
| Les.2964.3.A1_at      | BG626300   | TC23599 | 998  | 871  | 371  | 0.87 | 0.37 | Transcribed locus, weakly similar to NP_001042324.1 [Oryza sativa (japonica cultivar-group)]                                  |
| Les.2174.1.S1_at      | CN384833   | TC22746 | 175  | 99   | 65   | 0.56 | 0.37 | Transcribed locus                                                                                                             |
| Les.1784.2.A1_at      | BG628995   | TC24140 | 223  | 136  | 82   | 0.61 | 0.37 | Transcribed locus, weakly similar to XP_001118335.1 similar to intestinal facilitative glucose transporter 7 [Macaca mulatta] |
| Les.3742.1.S1_at      | AF146690.1 | TC22347 | 1098 | 681  | 406  | 0.62 | 0.37 | Pto-responsive gene 1 protein                                                                                                 |
| Les.4492.3.S1_at      | CK715138   | TC22356 | 2764 | 1890 | 1021 | 0.68 | 0.37 | Transcribed locus, weakly similar to XP_001111095.1 aldolase B isoform 5 [Macaca mulatta]                                     |
| LesAffx.37344.1.S1_at | AI897449   | TC21881 | 700  | 497  | 259  | 0.71 | 0.37 | Transcribed locus, weakly similar to NP_001042390.1 [Oryza sativa (japonica cultivar-group)]                                  |
| LesAffx.34986.1.S1_at | CK715664   | TC23304 | 576  | 399  | 212  | 0.69 | 0.37 | Transcribed locus, weakly similar to NP_001048569.1 [Oryza sativa (japonica cultivar-group)]                                  |
| Les.840.1.A1_at       | BG629718   | TC24411 | 847  | 904  | 310  | 1.07 | 0.37 | Transcribed locus                                                                                                             |
| LesAffx.70136.2.S1_at | AI899680   | TC23538 | 373  | 268  | 136  | 0.72 | 0.36 | Transcribed locus, weakly similar to NP_001044898.1 [Oryza sativa (japonica cultivar-group)]                                  |
| Les.5017.1.S1_at      | BT013110.1 | TC23613 | 280  | 256  | 102  | 0.91 | 0.36 | Lycopersicon esculentum clone 114397F, mRNA sequence                                                                          |
| LesAffx.3537.1.S1_at  | AJ784726   | TC24068 | 463  | 334  | 168  | 0.72 | 0.36 | ---                                                                                                                           |
| Les.1562.1.S1_at      | BG629310   | TC23006 | 446  | 232  | 161  | 0.52 | 0.36 | Lycopersicon esculentum clone 133516F, mRNA sequence                                                                          |
| LesAffx.3537.1.A1_at  | AJ784726   | TC24068 | 2229 | 1885 | 799  | 0.85 | 0.36 | ---                                                                                                                           |
| Les.1198.1.A1_at      | BG630006   | TC22356 | 151  | 103  | 54   | 0.68 | 0.36 | Transcribed locus, weakly similar to XP_001111095.1 aldolase B isoform 5 [Macaca mulatta]                                     |
| Les.2792.1.A1_at      | BG629283   | BG62927 | 390  | 393  | 139  | 1.01 | 0.36 | Transcribed locus                                                                                                             |
| Les.4975.1.S1_at      | BT013032.1 | TC23130 | 632  | 628  | 224  | 0.99 | 0.35 | Lycopersicon esculentum clone 114280F, mRNA sequence                                                                          |
| Les.5832.1.S1_at      | BT014414.1 | TC22401 | 2091 | 1147 | 742  | 0.55 | 0.35 | Lycopersicon esculentum clone 133722R, mRNA sequence                                                                          |
| Les.4886.1.S1_at      | BT012836.1 | BE44961 | 336  | 261  | 119  | 0.78 | 0.35 | Lycopersicon esculentum clone 113902F, mRNA sequence                                                                          |
| Les.4359.2.A1_at      | BG630798   | TC23326 | 468  | 275  | 166  | 0.59 | 0.35 | Pathogenesis-related protein P2                                                                                               |
| Les.799.1.A1_at       | BG627521   | BG62752 | 1103 | 758  | 387  | 0.69 | 0.35 | Transcribed locus, weakly similar to NP_001052094.1 [Oryza sativa (japonica cultivar-group)]                                  |
| LesAffx.37344.2.S1_at | BG131634   | TC21881 | 1341 | 897  | 468  | 0.67 | 0.35 | Transcribed locus, weakly similar to NP_001042390.1 [Oryza sativa (japonica cultivar-group)]                                  |
| Les.4982.1.S1_at      | BT013044.1 | AW62120 | 293  | 157  | 102  | 0.54 | 0.35 | Lycopersicon esculentum clone 114294R, mRNA sequence                                                                          |

|                       |            |         |      |      |      |      |      |                                                                                                              |
|-----------------------|------------|---------|------|------|------|------|------|--------------------------------------------------------------------------------------------------------------|
| LesAffx.57163.3.A1_at | AI486803   | TC22802 | 290  | 569  | 101  | 1.96 | 0.35 | Transcribed locus, weakly similar to NP_001042186.1 [Oryza sativa (japonica cultivar-group)]                 |
| LesAffx.69295.1.S1_at | BI933687   | TC23040 | 437  | 304  | 151  | 0.69 | 0.35 | Transcribed locus, weakly similar to NP_001045746.1 [Oryza sativa (japonica cultivar-group)]                 |
| Les.4428.2.S1_at      | CK575032   | TC21729 | 1975 | 2231 | 682  | 1.13 | 0.35 | carbonic anhydrase                                                                                           |
| Les.4974.1.S1_at      | BT013031.1 | TC23280 | 755  | 810  | 261  | 1.07 | 0.35 | Lycopersicon esculentum clone 114279F, mRNA sequence                                                         |
| Les.810.1.S1_at       | BG627575   | TC22972 | 780  | 556  | 268  | 0.71 | 0.34 | Lycopersicon esculentum clone 133744F, mRNA sequence                                                         |
| Les.4312.2.S1_at      | BG626083   | TC22795 | 6347 | 3463 | 2182 | 0.55 | 0.34 | CDNA, clone: FC02DB04, HTC in fruit                                                                          |
| Les.2173.1.A1_at      | BG631444   | TC23409 | 682  | 654  | 234  | 0.96 | 0.34 | Transcribed locus, weakly similar to NP_001044532.1 [Oryza sativa (japonica cultivar-group)]                 |
| Les.4345.1.S1_at      | BG629758   | TC23353 | 8774 | 7472 | 3008 | 0.85 | 0.34 | Lycopersicon esculentum clone 133385R, mRNA sequence                                                         |
| Les.828.1.A1_at       | BG627663   | TC24124 | 298  | 193  | 102  | 0.65 | 0.34 | Transcribed locus                                                                                            |
| Les.4181.1.A1_at      | BG630015   | TC22910 | 149  | 127  | 51   | 0.85 | 0.34 | Transcribed locus                                                                                            |
| LesAffx.37212.1.S1_at | AI491145   | TC23069 | 633  | 446  | 214  | 0.7  | 0.34 | ---                                                                                                          |
| LesAffx.13481.2.S1_at | BI921546   | TC22621 | 1698 | 1469 | 566  | 0.87 | 0.33 | Transcribed locus, weakly similar to NP_001044052.1 [Oryza sativa (japonica cultivar-group)]                 |
| Les.3266.2.S1_at      | BI931445   | TC23669 | 650  | 643  | 216  | 0.99 | 0.33 | Transcribed locus, moderately similar to NP_001047794.1 [Oryza sativa (japonica cultivar-group)]             |
| LesAffx.13481.2.A1_at | BI921546   | TC22621 | 2836 | 3094 | 942  | 1.09 | 0.33 | Transcribed locus, weakly similar to NP_001044052.1 [Oryza sativa (japonica cultivar-group)]                 |
| LesAffx.81.1.S1_at    | BG135419   | TC23216 | 1209 | 1053 | 400  | 0.87 | 0.33 | Transcribed locus, weakly similar to XP_001090175.1 hypothetical protein LOC51507 isoform 2 [Macaca mulatta] |
| Les.5017.1.A1_at      | BT013110.1 | TC23613 | 826  | 848  | 270  | 1.03 | 0.33 | Lycopersicon esculentum clone 114397F, mRNA sequence                                                         |
| Les.4008.2.S1_at      | BG643663   | TC21741 | 3548 | 1806 | 1148 | 0.51 | 0.32 | xyloglucan endotransglycosylase/hydrolase 16 protein                                                         |
| Les.2457.1.A1_at      | BG630077   | TC22085 | 2283 | 1899 | 738  | 0.83 | 0.32 | Transcribed locus                                                                                            |
| Les.4008.1.S1_at      | BG630151   | TC21741 | 3873 | 2084 | 1250 | 0.54 | 0.32 | xyloglucan endotransglycosylase/hydrolase 16 protein                                                         |
| LesAffx.57251.1.S1_at | BI208760   | TC22155 | 249  | 149  | 80   | 0.6  | 0.32 | Transcribed locus, weakly similar to NP_001043814.1 [Oryza sativa (japonica cultivar-group)]                 |
| LesAffx.13481.1.S1_at | BG134320   | TC22621 | 2025 | 2174 | 648  | 1.07 | 0.32 | Transcribed locus, weakly similar to NP_001044052.1 [Oryza sativa (japonica cultivar-group)]                 |
| Les.5157.1.S1_at      | BT013405.1 | TC23882 | 4803 | 4206 | 1529 | 0.88 | 0.32 | Lycopersicon esculentum clone 135719R, mRNA sequence                                                         |
| Les.4428.1.S1_a_at    | AW443158   | DB69734 | 707  | 823  | 222  | 1.16 | 0.31 | carbonic anhydrase                                                                                           |
| LesAffx.69609.1.S1_at | AW929283   | TC23404 | 208  | 147  | 65   | 0.71 | 0.31 | Transcribed locus, weakly similar to NP_001043990.1 [Oryza sativa (japonica cultivar-group)]                 |
| Les.2964.1.A1_at      | BG627802   | TC23599 | 1413 | 1110 | 442  | 0.79 | 0.31 | Transcribed locus, weakly similar to NP_001042324.1 [Oryza sativa (japonica cultivar-group)]                 |



|                       |            |         |      |      |      |      |      |                                                                                                                           |
|-----------------------|------------|---------|------|------|------|------|------|---------------------------------------------------------------------------------------------------------------------------|
| Les.144.1.S1_at       | Z75519.1   | TC22816 | 608  | 869  | 190  | 1.43 | 0.31 | Partial mRNA (clone SEND32)                                                                                               |
| Les.327.1.S1_at       | BT014378.1 | TC22961 | 4422 | 4496 | 1377 | 1.02 | 0.31 | Lycopersicon esculentum clone 133667F, mRNA sequence                                                                      |
| Les.3128.2.S1_s_at    | BI423262   | TC23347 | 471  | 512  | 145  | 1.09 | 0.31 | Lycopersicon esculentum clone 114279F, mRNA sequence                                                                      |
| Les.4508.2.S1_s_at    | AW623685   | TC23882 | 5220 | 4769 | 1603 | 0.91 | 0.31 | Lycopersicon esculentum clone 135719R, mRNA sequence                                                                      |
| LesAffx.33796.2.S1_at | AW650353   | TC23406 | 1963 | 1086 | 595  | 0.55 | 0.3  | ---                                                                                                                       |
| Les.3718.1.S1_at      | AF384374.1 | TC21922 | 2821 | 2954 | 853  | 1.05 | 0.3  | allene oxide cyclase                                                                                                      |
| Les.2504.1.A1_at      | BG628687   | TC23404 | 483  | 368  | 146  | 0.76 | 0.3  | Transcribed locus, weakly similar to NP_001043990.1 [Oryza sativa (japonica cultivar-group)]                              |
| LesAffx.56547.2.S1_at | BI207815   | TC22569 | 773  | 448  | 232  | 0.58 | 0.3  | Transcribed locus, weakly similar to NP_001042475.1 [Oryza sativa (japonica cultivar-group)]                              |
| LesAffx.56221.1.S1_at | AI894713   | TC24290 | 112  | 138  | 34   | 1.23 | 0.3  | Transcribed locus, weakly similar to NP_001042068.1 [Oryza sativa (japonica cultivar-group)]                              |
| Les.3515.1.S1_at      | AF242849.1 | TC21891 | 1107 | 1224 | 330  | 1.11 | 0.3  | wound-inducible carboxypeptidase                                                                                          |
| Les.3286.1.S1_at      | BT013249.1 | TC23425 | 5271 | 5601 | 1557 | 1.06 | 0.3  | Lycopersicon esculentum inducible plastid-lipid associated protein (CHRD)                                                 |
| LesAffx.37212.1.A1_at | AI491145   | TC23069 | 192  | 104  | 56   | 0.54 | 0.29 | ---                                                                                                                       |
| LesAffx.1.1.S1_at     | AY656838.1 | TC21732 | 2243 | 2378 | 653  | 1.06 | 0.29 | arginase 2                                                                                                                |
| Les.3376.1.A1_at      | BG630058   | TC21732 | 2956 | 2942 | 859  | 1    | 0.29 | CONSTANS interacting protein 1                                                                                            |
| LesAffx.71535.1.S1_at | AW040299   | TC23102 | 277  | 300  | 79   | 1.08 | 0.29 | Transcribed locus, weakly similar to NP_001049750.1 [Oryza sativa (japonica cultivar-group)]                              |
| Les.24.1.S1_at        | AF191823.1 | TC21735 | 410  | 262  | 116  | 0.64 | 0.28 | alpha-galactosidase                                                                                                       |
| Les.4953.1.S1_at      | BT012976.1 | TC23170 | 1282 | 897  | 361  | 0.7  | 0.28 | Lycopersicon esculentum clone 114187R, mRNA sequence                                                                      |
| Les.3065.2.A1_at      | BG630869   | TC22543 | 941  | 480  | 263  | 0.51 | 0.28 | Transcribed locus, weakly similar to NP_001042793.1 [Oryza sativa (japonica cultivar-group)]                              |
| Les.4345.4.A1_x_at    | BG631293   | TC22725 | 2058 | 1449 | 569  | 0.7  | 0.28 | Pathogenesis-related protein P2                                                                                           |
| Les.4345.3.S1_x_at    | AI775226   | TC22725 | 5727 | 4434 | 1582 | 0.77 | 0.28 | Pathogenesis-related protein P2                                                                                           |
| Les.1219.1.A1_at      | BG630155   | TC23499 | 161  | 201  | 45   | 1.25 | 0.28 | Transcribed locus, weakly similar to NP_001047376.1 [Oryza sativa (japonica cultivar-group)]                              |
| Les.3376.2.S1_at      | AW932459   | TC21732 | 1317 | 1274 | 361  | 0.97 | 0.27 | CONSTANS interacting protein 1                                                                                            |
| Les.1258.1.S1_at      | AY240230.1 | TC21731 | 2797 | 1685 | 767  | 0.6  | 0.27 | gamma-aminobutyrate transaminase subunit precursor isozyme 2                                                              |
| Les.4258.1.A1_at      | BG626687   | TC23571 | 793  | 604  | 217  | 0.76 | 0.27 | Transcribed locus, weakly similar to XP_001104139.1 similar to aarF domain containing kinase 1 isoform 2 [Macaca mulatta] |
| Les.2971.1.S1_at      | AI781668   | TC23191 | 2987 | 3170 | 806  | 1.06 | 0.27 | Wound-induced proteinase inhibitor I prepropeptide                                                                        |
| Les.3299.2.A1_s_at    | BG626957   | TC21732 | 1838 | 1968 | 495  | 1.07 | 0.27 | arginase 2                                                                                                                |
| Les.4258.3.S1_at      | BG128812   | TC23571 | 492  | 355  | 132  | 0.72 | 0.27 | Transcribed locus, weakly similar to XP_001104139.1 similar to aarF domain containing kinase 1 isoform 2 [Macaca mulatta] |
| Les.2168.1.S1_at      | BT013274.1 | TC23964 | 3447 | 2528 | 914  | 0.73 | 0.27 | Lycopersicon esculentum clone 134851R, mRNA sequence                                                                      |

|                       |            |         |      |      |      |      |      |                                                                                                                       |
|-----------------------|------------|---------|------|------|------|------|------|-----------------------------------------------------------------------------------------------------------------------|
| Les.4345.4.A1_at      | BG631293   | TC22725 | 2387 | 1550 | 631  | 0.65 | 0.26 | Pathogenesis-related protein P2                                                                                       |
| Les.4508.1.S1_s_at    | AI780576   | BG12438 | 4722 | 3993 | 1220 | 0.85 | 0.26 | Lycopersicon esculentum clone 135719R, mRNA sequence                                                                  |
| Les.1832.1.A1_at      | BG629451   | TC23307 | 1172 | 1556 | 301  | 1.33 | 0.26 | Transcribed locus, moderately similar to NP_001062542.1 [Oryza sativa (japonica cultivar-group)]                      |
| Les.3297.1.S1_at      | BG630303   | TC21776 | 5073 | 3472 | 1277 | 0.68 | 0.25 | Transcribed locus, weakly similar to NP_001043493.1 [Oryza sativa (japonica cultivar-group)]                          |
| Les.4345.2.A1_x_at    | AI781554   | TC23670 | 6562 | 5221 | 1622 | 0.8  | 0.25 | Pathogenesis-related protein P2                                                                                       |
| Les.3297.2.S1_at      | AI773077   | TC23571 | 1395 | 840  | 345  | 0.6  | 0.25 | Transcribed locus, weakly similar to NP_001043493.1 [Oryza sativa (japonica cultivar-group)]                          |
| LesAffx.10650.1.S1_at | AW036686   | TC23252 | 1928 | 1945 | 476  | 1.01 | 0.25 | CDNA, clone: FC20BC08, HTC in fruit                                                                                   |
| Les.2012.1.S1_at      | BG627650   | TC23373 | 258  | 189  | 62   | 0.73 | 0.24 | Myo-inositol-1-phosphate synthase                                                                                     |
| Les.174.1.A1_at       | BG627544   | TC24015 | 109  | 68   | 26   | 0.62 | 0.24 | Transcribed locus, moderately similar to NP_001045188.1 [Oryza sativa (japonica cultivar-group)]                      |
| Les.1314.1.S1_at      | BG630759   | TC24293 | 344  | 387  | 81   | 1.12 | 0.24 | Transcribed locus                                                                                                     |
| Les.3054.1.S1_at      | AI773693   | TC23429 | 4567 | 3441 | 1063 | 0.75 | 0.23 | Lycopersicon esculentum clone 135718R, mRNA sequence                                                                  |
| Les.4428.1.S1_at      | AW443158   | DB69734 | 457  | 551  | 105  | 1.2  | 0.23 | carbonic anhydrase                                                                                                    |
| Les.233.1.S1_at       | M17558.1   | TC23200 | 4325 | 3370 | 987  | 0.78 | 0.23 | chlorophyll a/b-binding protein precursor                                                                             |
| Les.4345.2.A1_a_at    | AI781554   | TC23670 | 5915 | 4475 | 1332 | 0.76 | 0.23 | Lycopersicon esculentum clone 133385R, mRNA sequence                                                                  |
| Les.4766.1.S1_at      | CN385384   | TC23006 | 3456 | 2381 | 776  | 0.69 | 0.22 | Lycopersicon esculentum clone 133946F, mRNA sequence                                                                  |
| Les.84.1.S1_at        | U50151.1   | TC21723 | 4421 | 4639 | 987  | 1.05 | 0.22 | leucine aminopeptidase                                                                                                |
| Les.4868.1.S1_at      | BT012795.1 | TC22912 | 167  | 156  | 37   | 0.94 | 0.22 | Lycopersicon esculentum clone 113794R, mRNA sequence                                                                  |
| Les.3070.1.S1_at      | BG126941   | TC22028 | 3102 | 2930 | 658  | 0.94 | 0.21 | Transcribed locus, weakly similar to NP_001042269.1 [Oryza sativa (japonica cultivar-group)]                          |
| Les.3070.2.A1_at      | BG629293   | TC22028 | 4745 | 4233 | 1003 | 0.89 | 0.21 | Transcribed locus, weakly similar to NP_001042269.1 [Oryza sativa (japonica cultivar-group)]                          |
| Les.4281.3.S1_at      | AI771846   | TC21921 | 179  | 186  | 38   | 1.04 | 0.21 | Transcribed locus, weakly similar to XP_001110787.1 ectonucleoside triphosphate diphosphohydrolase 3 [Macaca mulatta] |
| Les.4988.1.S1_at      | BT013056.1 | TC22946 | 2992 | 2643 | 617  | 0.88 | 0.21 | Lycopersicon esculentum clone 114312R, mRNA sequence                                                                  |
| LesAffx.10091.1.S1_at | AI487223   | TC23911 | 233  | 170  | 48   | 0.73 | 0.21 | Transcribed locus, weakly similar to NP_173851.1 [Arabidopsis thaliana]                                               |
| Les.4281.1.A1_at      | BG626715   | TC21921 | 1554 | 1651 | 319  | 1.06 | 0.21 | Transcribed locus, weakly similar to XP_001110787.1 ectonucleoside triphosphate diphosphohydrolase 3 [Macaca mulatta] |
| Les.4281.2.S1_at      | BI926015   | DB69892 | 932  | 1089 | 189  | 1.17 | 0.2  | Transcribed locus, weakly similar to XP_001110787.1 ectonucleoside triphosphate diphosphohydrolase 3 [Macaca mulatta] |
| Les.4923.1.S1_at      | BT012912.1 | TC22925 | 566  | 759  | 113  | 1.34 | 0.2  | Lycopersicon esculentum clone 114030R, mRNA sequence                                                                  |
| Les.4405.1.A1_at      | BG630861   | TC24428 | 1573 | 832  | 302  | 0.53 | 0.19 | Transcribed locus, moderately similar to NP_001047599.1 [Oryza sativa (japonica cultivar-group)]                      |

|                       |            |         |      |      |      |      |      |                                                                                                                 |
|-----------------------|------------|---------|------|------|------|------|------|-----------------------------------------------------------------------------------------------------------------|
| LesAffx.65984.1.S1_at | BG125327   | GO37430 | 2430 | 1237 | 462  | 0.51 | 0.19 | Transcribed locus, weakly similar to NP_001044052.1 [Oryza sativa (japonica cultivar-group)]                    |
| Les.3322.3.S1_at      | AW443800   | BP90402 | 850  | 445  | 159  | 0.52 | 0.19 | Transcribed locus, moderately similar to NP_001047599.1 [Oryza sativa (japonica cultivar-group)]                |
| Les.3016.1.S1_at      | BT012757.1 | TC24030 | 1306 | 828  | 200  | 0.63 | 0.15 | Lycopersicon esculentum clone 113701F, mRNA sequence                                                            |
| Les.2316.2.A1_at      | BG626036   | TC22940 | 3550 | 2137 | 522  | 0.6  | 0.15 | Transcribed locus, weakly similar to NP_001044252.1 [Oryza sativa (japonica cultivar-group)]                    |
| Les.2316.1.S1_at      | AW623527   | TC22940 | 3402 | 2037 | 458  | 0.6  | 0.13 | Transcribed locus, weakly similar to NP_001044252.1 [Oryza sativa (japonica cultivar-group)]                    |
| Les.147.1.S1_at       | BG629070   | TC22473 | 419  | 392  | 53   | 0.93 | 0.13 | chlorophyll a/b-binding protein precursor                                                                       |
| LesAffx.29797.1.S1_at | AJ784483   | TC23412 | 497  | 391  | 58   | 0.79 | 0.12 | Transcribed locus, weakly similar to NP_001042863.1 [Oryza sativa (japonica cultivar-group)]                    |
| Les.5201.1.S1_at      | BT013496.1 | FS19239 | 451  | 228  | 384  | 0.5  | 0.85 | Lycopersicon esculentum clone 132182F, mRNA sequence                                                            |
| LesAffx.53474.1.S1_at | BG133264   | TC22918 | 1208 | 609  | 654  | 0.5  | 0.54 | Transcribed locus, weakly similar to NP_001042043.1 [Oryza sativa (japonica cultivar-group)]                    |
| Les.3017.3.S1_at      | BE462343   | TC21898 | 465  | 234  | 378  | 0.5  | 0.81 | Transcribed locus, weakly similar to XP_001084411.1 aquaporin 1 [Macaca mulatta]                                |
| LesAffx.59952.1.S1_at | BF114023   | TC23767 | 10   | 5    | 9    | 0.5  | 0.88 | Transcribed locus, moderately similar to NP_001047491.1 [Oryza sativa (japonica cultivar-group)]                |
| Les.5263.1.S1_at      | BT013600.1 | TC22756 | 284  | 143  | 208  | 0.5  | 0.73 | Lycopersicon esculentum clone 132364F, mRNA sequence                                                            |
| LesAffx.66226.2.S1_at | BI205336   | TC22735 | 438  | 220  | 335  | 0.5  | 0.76 | Transcribed locus, weakly similar to NP_001041821.1 [Oryza sativa (japonica cultivar-group)]                    |
| LesAffx.9975.1.A1_at  | AI487405   | AI48740 | 51   | 26   | 34   | 0.5  | 0.66 | ---                                                                                                             |
| Les.3701.1.S1_at      | AF022022.1 | TC24440 | 35   | 18   | 70   | 0.5  | 1.98 | IAA11 protein                                                                                                   |
| Les.34.1.S1_at        | AF050496.1 | TC21713 | 472  | 236  | 283  | 0.5  | 0.6  | Ca <sup>2+</sup> -ATPase                                                                                        |
| Les.2626.1.S1_at      | BG735008   | TC22245 | 3727 | 1860 | 1994 | 0.5  | 0.54 | Lycopersicon esculentum clone 132901F, mRNA sequence                                                            |
| Les.3094.3.S1_at      | BG125458   | TC23596 | 1688 | 842  | 608  | 0.5  | 0.36 | Transcribed locus, weakly similar to NP_001041542.1 P450, family 51, subfamily A, polypeptide 1 [Gallus gallus] |
| Les.876.1.A1_at       | BG627344   | TC22377 | 215  | 107  | 85   | 0.5  | 0.4  | Transcribed locus, weakly similar to NP_001051973.1 [Oryza sativa (japonica cultivar-group)]                    |
| LesAffx.47070.1.S1_at | AW651406   | AW65140 | 45   | 22   | 39   | 0.5  | 0.88 | Transcribed locus, moderately similar to NP_001042375.1 [Oryza sativa (japonica cultivar-group)]                |
| Les.1654.1.A1_at      | BG627748   | TC23489 | 2715 | 1349 | 1705 | 0.5  | 0.63 | Transcribed locus, weakly similar to NP_001042315.1 [Oryza sativa (japonica cultivar-group)]                    |
| LesAffx.54718.1.S1_at | BM411779   | TC22617 | 804  | 399  | 315  | 0.5  | 0.39 | Transcribed locus, moderately similar to NP_001044227.1 [Oryza sativa (japonica cultivar-group)]                |

|                       |            |         |      |      |      |      |      |                                                                                                                                |
|-----------------------|------------|---------|------|------|------|------|------|--------------------------------------------------------------------------------------------------------------------------------|
| LesAffx.71388.1.S1_at | AW034384   | TC22565 | 237  | 118  | 93   | 0.5  | 0.39 | Transcribed locus, weakly similar to NP_001042342.1 [Oryza sativa (japonica cultivar-group)]                                   |
| Les.355.1.A1_at       | BG627591   | TC23931 | 599  | 297  | 263  | 0.5  | 0.44 | Transcribed locus                                                                                                              |
| LesAffx.65695.2.A1_at | AI484733   | TC23451 | 319  | 158  | 223  | 0.49 | 0.7  | Transcribed locus, moderately similar to NP_001047304.1 [Oryza sativa (japonica cultivar-group)]                               |
| Les.1079.3.A1_at      | BG626088   | GO37592 | 70   | 35   | 34   | 0.49 | 0.48 | Transcribed locus, weakly similar to NP_001043162.1 [Oryza sativa (japonica cultivar-group)]                                   |
| Les.3322.1.S1_at      | BI935557   | TC22083 | 595  | 293  | 112  | 0.49 | 0.19 | Transcribed locus, moderately similar to NP_001047599.1 [Oryza sativa (japonica cultivar-group)]                               |
| Les.5290.1.S1_at      | BT013644.1 | TC23296 | 2487 | 1225 | 2254 | 0.49 | 0.91 | Lycopersicon esculentum clone 132449R, mRNA sequence                                                                           |
| Les.46.1.S1_at        | X60760.1   | NP00035 | 238  | 117  | 202  | 0.49 | 0.85 | TDR8 protein                                                                                                                   |
| LesAffx.7472.2.S1_at  | AW651303   | TC23954 | 287  | 141  | 84   | 0.49 | 0.29 | Transcribed locus, weakly similar to NP_001043730.1 [Oryza sativa (japonica cultivar-group)]                                   |
| Les.1197.1.S1_at      | BI925087   | TC22471 | 542  | 266  | 218  | 0.49 | 0.4  | Transcribed locus, weakly similar to XP_001090911.1 LanC lantibiotic synthetase component C-like 2 isoform 2 [Macaca mulatta]  |
| Les.2092.1.S1_at      | BG626759   | TC22657 | 2326 | 1141 | 2102 | 0.49 | 0.9  | Transcribed locus, weakly similar to XP_001111095.1 aldolase B isoform 5 [Macaca mulatta]                                      |
| LesAffx.66458.1.A1_at | CK720557   | TC23194 | 77   | 38   | 47   | 0.49 | 0.61 | ---                                                                                                                            |
| Les.2068.1.A1_at      | BG631401   | TC24040 | 454  | 222  | 320  | 0.49 | 0.71 | Transcribed locus, weakly similar to NP_001045667.1 [Oryza sativa (japonica cultivar-group)]                                   |
| Les.1376.2.A1_at      | BG629093   | TC23229 | 475  | 232  | 379  | 0.49 | 0.8  | Transcribed locus, weakly similar to NP_001043392.1 [Oryza sativa (japonica cultivar-group)]                                   |
| Les.3792.1.S1_s_at    | AF249329.1 | GO37419 | 1758 | 858  | 270  | 0.49 | 0.15 | Lycopersicon esculentum putative cytochrome P450                                                                               |
| Les.1248.2.A1_at      | BT012749.1 | TC21728 | 865  | 422  | 435  | 0.49 | 0.5  | GDP-mannose pyrophosphorylase                                                                                                  |
| Les.4707.1.S1_at      | BT012714.1 | TC23557 | 567  | 276  | 396  | 0.49 | 0.7  | Lycopersicon esculentum clone 113596R, mRNA sequence                                                                           |
| Les.4896.1.S1_at      | BT012857.1 | TC23109 | 2404 | 1172 | 933  | 0.49 | 0.39 | Lycopersicon esculentum clone 113944R, mRNA sequence                                                                           |
| LesAffx.41330.2.S1_at | AI899559   | TC24064 | 499  | 243  | 217  | 0.49 | 0.43 | Transcribed locus, weakly similar to NP_001067668.1 [Oryza sativa (japonica cultivar-group)]                                   |
| LesAffx.71503.1.S1_at | AW648310   | TC22254 | 1050 | 511  | 898  | 0.49 | 0.85 | Transcribed locus, weakly similar to NP_001044300.1 [Oryza sativa (japonica cultivar-group)]                                   |
| Les.5312.1.S1_at      | BT013697.1 | TC22735 | 4469 | 2175 | 742  | 0.49 | 0.17 | Lycopersicon esculentum clone 132539F, mRNA sequence                                                                           |
| Les.3017.1.A1_at      | BG629826   | AI78132 | 735  | 358  | 611  | 0.49 | 0.83 | Transcribed locus, weakly similar to XP_001084411.1 aquaporin 1 [Macaca mulatta]                                               |
| Les.3506.1.S1_at      | AF365930.1 | TC21713 | 883  | 429  | 1004 | 0.49 | 1.14 | verticillium wilt disease resistance protein Ve2                                                                               |
| Les.305.3.S1_at       | AW930072   | TC23404 | 1000 | 486  | 566  | 0.49 | 0.57 | Transcribed locus, weakly similar to XP_001100725.1 similar to eukaryotic translation initiation factor 2C, 2 [Macaca mulatta] |
| Les.4493.3.S1_at      | CN385077   | TC23105 | 195  | 95   | 84   | 0.49 | 0.43 | ADP/ATP translocator                                                                                                           |

|                       |            |         |      |      |      |      |      |                                                                                                                               |
|-----------------------|------------|---------|------|------|------|------|------|-------------------------------------------------------------------------------------------------------------------------------|
| LesAffx.24799.1.S1_at | CK715756   | TC23394 | 625  | 303  | 402  | 0.48 | 0.64 | Transcribed locus, weakly similar to NP_001045764.1 [Oryza sativa (japonica cultivar-group)]                                  |
| Les.1108.1.A1_at      | BG629434   | TC22374 | 492  | 238  | 302  | 0.48 | 0.61 | Transcribed locus, weakly similar to NP_001042402.1 [Oryza sativa (japonica cultivar-group)]                                  |
| Les.4397.1.S1_at      | BG127578   | TC23761 | 268  | 129  | 170  | 0.48 | 0.63 | CDNA, clone: FC25AG12, HTC in fruit                                                                                           |
| Les.4397.2.A1_at      | AW218741   | TC23761 | 693  | 334  | 427  | 0.48 | 0.62 | CDNA, clone: FC25AG12, HTC in fruit                                                                                           |
| Les.1205.2.S1_at      | BM536081   | TC21911 | 688  | 331  | 180  | 0.48 | 0.26 | Transcribed locus, weakly similar to NP_001059455.1 [Oryza sativa (japonica cultivar-group)]                                  |
| LesAffx.41330.1.A1_at | CK574967   | TC24064 | 326  | 157  | 138  | 0.48 | 0.42 | Transcribed locus, weakly similar to NP_001067668.1 [Oryza sativa (japonica cultivar-group)]                                  |
| LesAffx.64675.2.A1_at | AJ784544   | TC21939 | 207  | 100  | 127  | 0.48 | 0.61 | Transcribed locus, weakly similar to NP_001052406.1 [Oryza sativa (japonica cultivar-group)]                                  |
| Les.1465.1.S1_at      | BG631822   | TC23566 | 1249 | 601  | 491  | 0.48 | 0.39 | Lycopersicon esculentum clone 132131F, mRNA sequence                                                                          |
| Les.1320.1.A1_at      | BG630795   | BG63079 | 25   | 12   | 14   | 0.48 | 0.58 | Transcribed locus                                                                                                             |
| Les.5352.1.S1_at      | BT013754.1 | TC23917 | 1980 | 946  | 1078 | 0.48 | 0.54 | Lycopersicon esculentum clone 132620F, mRNA sequence                                                                          |
| Les.2219.1.A1_at      | BG735134   | TC23582 | 768  | 365  | 391  | 0.47 | 0.51 | Transcribed locus, weakly similar to NP_568624.1 protein [Arabidopsis thaliana]                                               |
| Les.1197.2.A1_at      | BG630003   | TC23124 | 2179 | 1029 | 943  | 0.47 | 0.43 | Transcribed locus, weakly similar to XP_001090911.1 LanC lantibiotic synthetase component C-like 2 isoform 2 [Macaca mulatta] |
| LesAffx.44609.1.S1_at | BG631285   | TC23469 | 498  | 235  | 657  | 0.47 | 1.32 | Transcribed locus, weakly similar to NP_187615.2 factor [Arabidopsis thaliana]                                                |
| Les.1857.1.A1_at      | BG629691   | TC23786 | 90   | 43   | 86   | 0.47 | 0.96 | Transcribed locus, weakly similar to NP_001060003.1 [Oryza sativa (japonica cultivar-group)]                                  |
| Les.4050.1.A1_at      | L26982.1   |         | 394  | 185  | 221  | 0.47 | 0.56 | Lycopersicon esculentum (DB173) mRNA fragment                                                                                 |
| LesAffx.17150.1.A1_at | AW039265   | TC23237 | 262  | 123  | 129  | 0.47 | 0.49 | Nitrite reductase                                                                                                             |
| LesAffx.67767.1.S1_at | BF096648   | TC22922 | 185  | 87   | 261  | 0.47 | 1.41 | Transcribed locus, weakly similar to NP_568700.1 protein [Arabidopsis thaliana]                                               |
| LesAffx.46046.1.S1_at | BI208410   | TC24515 | 280  | 131  | 420  | 0.47 | 1.5  | ---                                                                                                                           |
| Les.1205.3.S1_at      | BM410805   | TC21911 | 1109 | 520  | 289  | 0.47 | 0.26 | Transcribed locus, weakly similar to NP_001059455.1 [Oryza sativa (japonica cultivar-group)]                                  |
| LesAffx.41518.1.S1_at | AW930080   | TC23094 | 250  | 116  | 149  | 0.47 | 0.59 | Transcribed locus, weakly similar to NP_001050851.1 [Oryza sativa (japonica cultivar-group)]                                  |
| LesAffx.71563.1.S1_at | AW930851   | TC22892 | 491  | 228  | 294  | 0.46 | 0.6  | ---                                                                                                                           |
| Les.2474.2.A1_at      | BG735266   | TC23985 | 1861 | 861  | 503  | 0.46 | 0.27 | Transcribed locus, weakly similar to XP_001108186.1 similar to 24-dehydrocholesterol reductase precursor [Macaca mulatta]     |
| Les.3519.1.S1_at      | AJ002589.1 | TC23298 | 302  | 139  | 163  | 0.46 | 0.54 | CycD3;2 protein                                                                                                               |
| Les.68.2.S1_a_at      | BT013727.1 | TC21796 | 2136 | 988  | 906  | 0.46 | 0.42 | endo-beta-1,4-D-glucanase                                                                                                     |
| Les.1821.1.A1_at      | BG629348   | BG62934 | 341  | 157  | 201  | 0.46 | 0.59 | Transcribed locus                                                                                                             |

|                       |            |         |      |      |      |      |      |                                                                                                                   |
|-----------------------|------------|---------|------|------|------|------|------|-------------------------------------------------------------------------------------------------------------------|
| Les.181.1.A1_at       | BG630947   | TC23820 | 325  | 149  | 177  | 0.46 | 0.55 | Transcribed locus, weakly similar to NP_001043252.1 [Oryza sativa (japonica cultivar-group)]                      |
| Les.4979.1.S1_at      | BT013040.1 | TC21739 | 457  | 210  | 300  | 0.46 | 0.66 | Lycopersicon esculentum clone 114290R, mRNA sequence                                                              |
| LesAffx.885.1.S1_at   | BI205930   | BI20593 | 262  | 121  | 145  | 0.46 | 0.55 | ---                                                                                                               |
| Les.1376.1.A1_at      | BG631198   | TC23229 | 1540 | 706  | 1125 | 0.46 | 0.73 | Transcribed locus, weakly similar to NP_001043392.1 [Oryza sativa (japonica cultivar-group)]                      |
| LesAffx.26471.3.A1_at | AW218200   | TC22883 | 289  | 132  | 152  | 0.46 | 0.53 | Transcribed locus, weakly similar to NP_001054088.1 [Oryza sativa (japonica cultivar-group)]                      |
| Les.1179.1.A1_at      | BG629888   | TC24291 | 211  | 96   | 183  | 0.46 | 0.87 | Transcribed locus                                                                                                 |
| LesAffx.24799.2.S1_at | BI209670   | TC24255 | 1037 | 473  | 653  | 0.46 | 0.63 | Transcribed locus, weakly similar to NP_001045764.1 [Oryza sativa (japonica cultivar-group)]                      |
| LesAffx.3570.4.S1_at  | AW624180   | TC22612 | 1125 | 512  | 886  | 0.46 | 0.79 | Ribosomal protein L2                                                                                              |
| LesAffx.46550.1.S1_at | BG134870   | BG13487 | 127  | 58   | 130  | 0.46 | 1.02 | ---                                                                                                               |
| LesAffx.30807.1.S1_at | AW624957   | AW62495 | 1352 | 615  | 1013 | 0.45 | 0.75 | Transcribed locus, weakly similar to XP_001116629.1 similar to fatty acid desaturase 2 isoform 2 [Macaca mulatta] |
| Les.3477.1.S1_at      | AF230198.2 | TC23205 | 112  | 51   | 41   | 0.45 | 0.37 | hypothetical LOC543641                                                                                            |
| Les.857.1.S1_at       | BT013838.1 | TC22565 | 575  | 260  | 244  | 0.45 | 0.42 | Lycopersicon esculentum clone 132795F, mRNA sequence                                                              |
| Les.3198.1.S1_at      | L13654.1   | TC22193 | 232  | 105  | 80   | 0.45 | 0.35 | Lycopersicon esculentum peroxidase (TPX1)                                                                         |
| Les.3065.1.S1_at      | BI929558   | TC22543 | 618  | 279  | 191  | 0.45 | 0.31 | Transcribed locus, weakly similar to NP_001042793.1 [Oryza sativa (japonica cultivar-group)]                      |
| Les.2688.1.S1_at      | AJ560646.1 | TC21917 | 431  | 194  | 578  | 0.45 | 1.34 | expansin11                                                                                                        |
| Les.5327.1.S1_at      | BT013719.1 | TC24178 | 1067 | 476  | 630  | 0.45 | 0.59 | Lycopersicon esculentum clone 132567F, mRNA sequence                                                              |
| Les.360.1.S1_at       | M86724.1   | TC23986 | 2417 | 1075 | 3862 | 0.44 | 1.6  | alcohol dehydrogenase                                                                                             |
| Les.3312.2.S1_at      | BI932707   | TC21843 | 1807 | 802  | 1307 | 0.44 | 0.72 | Transcribed locus, weakly similar to NP_001043993.1 [Oryza sativa (japonica cultivar-group)]                      |
| Les.4050.1.S1_at      | L26982.1   |         | 409  | 182  | 229  | 0.44 | 0.56 | Lycopersicon esculentum (DB173) mRNA fragment                                                                     |
| Les.2014.1.A1_at      | BG629750   | TC23266 | 2443 | 1081 | 1800 | 0.44 | 0.74 | Transcribed locus, weakly similar to NP_001046281.1 [Oryza sativa (japonica cultivar-group)]                      |
| Les.5161.1.S1_at      | BT013412.1 | AI77756 | 331  | 146  | 204  | 0.44 | 0.61 | Lycopersicon esculentum clone 132049R, mRNA sequence                                                              |
| LesAffx.5088.1.S1_at  | BI206366   | BI20636 | 63   | 28   | 33   | 0.44 | 0.52 | ---                                                                                                               |
| Les.5579.1.S1_at      | BT014190.1 | TC23962 | 970  | 425  | 961  | 0.44 | 0.99 | Lycopersicon esculentum clone 133367R, mRNA sequence                                                              |
| Les.5150.1.S1_at      | BT013389.1 | AW92832 | 538  | 233  | 288  | 0.43 | 0.53 | Lycopersicon esculentum clone 135570F, mRNA sequence                                                              |
| Les.5233.1.S1_at      | CN384566   | EG55296 | 258  | 111  | 245  | 0.43 | 0.95 | Lycopersicon esculentum clone 132260F, mRNA sequence                                                              |
| LesAffx.4981.1.S1_at  | AW623022   | TC22429 | 4746 | 2048 | 1251 | 0.43 | 0.26 | Transcribed locus, weakly similar to NP_001041979.1 [Oryza sativa (japonica cultivar-group)]                      |

|                       |            |         |      |      |      |      |      |                                                                                                                           |
|-----------------------|------------|---------|------|------|------|------|------|---------------------------------------------------------------------------------------------------------------------------|
| Les.2474.1.S1_at      | BG791226   | TC23985 | 996  | 430  | 284  | 0.43 | 0.29 | Transcribed locus, weakly similar to XP_001108186.1 similar to 24-dehydrocholesterol reductase precursor [Macaca mulatta] |
| LesAffx.62070.1.S1_at | BI924487   | TC23266 | 2797 | 1201 | 2107 | 0.43 | 0.75 | Transcribed locus, weakly similar to NP_001046281.1 [Oryza sativa (japonica cultivar-group)]                              |
| LesAffx.58227.1.S1_at | CK714930   | CK71493 | 351  | 150  | 230  | 0.43 | 0.66 | ---                                                                                                                       |
| LesAffx.66879.1.A1_at | BG631312   | TC22769 | 1037 | 442  | 548  | 0.43 | 0.53 | CDNA, clone: FC04CE09, HTC in fruit                                                                                       |
| LesAffx.58110.1.S1_at | BE435276   | BE43527 | 1314 | 559  | 590  | 0.43 | 0.45 | ---                                                                                                                       |
| LesAffx.61034.1.S1_at | BG643132   | TC21983 | 1515 | 644  | 1233 | 0.42 | 0.81 | Transcribed locus, weakly similar to NP_001043558.1 [Oryza sativa (japonica cultivar-group)]                              |
| Les.4962.1.S1_at      | BI204454   | TC22450 | 929  | 394  | 798  | 0.42 | 0.86 | Lycopersicon esculentum clone 114228R, mRNA sequence                                                                      |
| LesAffx.61000.1.S1_at | BM410987   | TC23050 | 1288 | 543  | 600  | 0.42 | 0.47 | Transcribed locus, weakly similar to NP_001045184.1 [Oryza sativa (japonica cultivar-group)]                              |
| LesAffx.67767.1.A1_at | AI486022   | TC22922 | 152  | 64   | 155  | 0.42 | 1.02 | Transcribed locus, weakly similar to NP_568700.1 protein [Arabidopsis thaliana]                                           |
| Les.4710.1.S1_at      | BT014526.1 | TC24079 | 67   | 28   | 23   | 0.42 | 0.34 | Lycopersicon esculentum clone 133940F, mRNA sequence                                                                      |
| Les.252.1.S1_at       | U35643.1   | DB68734 | 2438 | 1021 | 1852 | 0.42 | 0.76 | Alpha-dioxygenase 2                                                                                                       |
| LesAffx.56.16.A1_at   | BG643188   | AI89840 | 234  | 98   | 150  | 0.42 | 0.64 | Transcribed locus, moderately similar to NP_001059779.1 [Oryza sativa (japonica cultivar-group)]                          |
| Les.2092.2.S1_at      | BI203427   | BG63176 | 1322 | 550  | 1088 | 0.42 | 0.82 | Transcribed locus, weakly similar to XP_001111095.1 aldolase B isoform 5 [Macaca mulatta]                                 |
| LesAffx.24799.2.A1_at | BI209670   | TC24255 | 483  | 199  | 284  | 0.41 | 0.59 | Transcribed locus, weakly similar to NP_001045764.1 [Oryza sativa (japonica cultivar-group)]                              |
| Les.3064.1.S1_at      | U81033.1   | TC21721 | 1637 | 674  | 963  | 0.41 | 0.59 | ADP-glucose pyrophosphorylase large subunit                                                                               |
| LesAffx.23349.1.S1_at | AI782014   | TC21920 | 887  | 361  | 1050 | 0.41 | 1.18 | ADP/ATP translocator                                                                                                      |
| Les.2091.1.S1_at      | BT013457.1 | TC22626 | 621  | 252  | 502  | 0.41 | 0.81 | Lycopersicon esculentum clone 132113R, mRNA sequence                                                                      |
| LesAffx.46815.2.S1_at | BI929852   | TC22829 | 2607 | 1058 | 1179 | 0.41 | 0.45 | Hypothetical LOC544002                                                                                                    |
| Les.5918.1.S1_at      | AY224079.1 | TC21718 | 376  | 152  | 281  | 0.41 | 0.75 | ferric-chelate reductase                                                                                                  |
| LesAffx.9038.1.S1_at  | BI930643   | TC22956 | 946  | 381  | 272  | 0.4  | 0.29 | Transcribed locus, weakly similar to NP_001042297.1 [Oryza sativa (japonica cultivar-group)]                              |
| LesAffx.41774.1.S1_at | AW031192   | TC22848 | 915  | 368  | 635  | 0.4  | 0.69 | Transcribed locus, weakly similar to NP_001045466.1 [Oryza sativa (japonica cultivar-group)]                              |
| Les.2539.1.A1_at      | BG628858   | TC24275 | 119  | 47   | 95   | 0.4  | 0.8  | Transcribed locus                                                                                                         |
| LesAffx.58019.1.S1_at | BI929233   | TC22171 | 269  | 106  | 136  | 0.4  | 0.5  | Transcribed locus, weakly similar to NP_001052012.1 [Oryza sativa (japonica cultivar-group)]                              |
| LesAffx.33890.1.S1_at | BG134582   | TC22584 | 190  | 75   | 108  | 0.39 | 0.57 | Transcribed locus, weakly similar to NP_001067602.1 [Oryza sativa (japonica cultivar-group)]                              |
|                       |            |         | 43   | 17   | 24   | 0.39 | 0.57 | ---                                                                                                                       |

|                       |            |         |      |      |      |      |      |                                                                                                                                 |
|-----------------------|------------|---------|------|------|------|------|------|---------------------------------------------------------------------------------------------------------------------------------|
| Les.5850.1.S1_at      | BT014189.1 | TC21894 | 438  | 170  | 224  | 0.39 | 0.51 | Lycopersicon esculentum clone 133366R, mRNA sequence                                                                            |
| LesAffx.4617.1.A1_at  | BG735509   | TC23088 | 864  | 335  | 478  | 0.39 | 0.55 | Transcribed locus, weakly similar to NP_001041735.1 [Oryza sativa (japonica cultivar-group)]                                    |
| LesAffx.58110.1.A1_at | AJ785349   | BE43527 | 312  | 121  | 126  | 0.39 | 0.4  | ---                                                                                                                             |
| Les.263.1.S1_at       | M98466.1   | TC21722 | 2490 | 963  | 1824 | 0.39 | 0.73 | polygalacturonase isoenzyme 1 beta subunit                                                                                      |
| LesAffx.17924.1.S1_at | BG124217   | TC24101 | 1606 | 619  | 803  | 0.39 | 0.5  | Transcribed locus, weakly similar to NP_001049241.1 [Oryza sativa (japonica cultivar-group)]                                    |
| LesAffx.71563.1.A1_at | AI487345   | TC22892 | 380  | 146  | 191  | 0.38 | 0.5  | ---                                                                                                                             |
| LesAffx.16472.1.S1_at | AI774397   | TC24204 | 125  | 48   | 116  | 0.38 | 0.93 | ---                                                                                                                             |
| LesAffx.46815.1.S1_at | BI934723   | TC21911 | 935  | 357  | 394  | 0.38 | 0.42 | Hypothetical LOC544002                                                                                                          |
| Les.642.1.S1_at       | BG626672   | BG62667 | 135  | 51   | 48   | 0.38 | 0.35 | Lycopersicon esculentum clone 132200F, mRNA sequence                                                                            |
| LesAffx.62334.1.S1_at | AW647879   | AW64787 | 29   | 11   | 25   | 0.38 | 0.86 | ---                                                                                                                             |
| LesAffx.37636.1.S1_at | CN384813   | EG55389 | 60   | 22   | 43   | 0.37 | 0.72 | ---                                                                                                                             |
| LesAffx.53591.1.S1_at | AI899018   | TC22292 | 242  | 90   | 36   | 0.37 | 0.15 | Transcribed locus, weakly similar to XP_001101267.1 similar to myeloblastosis proto-oncogene product isoform 2 [Macaca mulatta] |
| Les.1549.1.A1_at      | BG626692   | TC23631 | 811  | 301  | 431  | 0.37 | 0.53 | Transcribed locus                                                                                                               |
| LesAffx.30937.1.A1_at | AJ785090   |         | 285  | 105  | 152  | 0.37 | 0.53 | ---                                                                                                                             |
| LesAffx.64757.1.S1_at | AI490042   | TC22570 | 1101 | 403  | 624  | 0.37 | 0.57 | Transcribed locus                                                                                                               |
| LesAffx.6110.1.S1_at  | BF098450   | TC22721 | 141  | 51   | 46   | 0.36 | 0.33 | ---                                                                                                                             |
| LesAffx.63209.1.S1_at | AW092854   | AW09285 | 265  | 95   | 385  | 0.36 | 1.45 | ---                                                                                                                             |
| LesAffx.10497.2.A1_at | AI897776   | TC24435 | 4369 | 1559 | 2285 | 0.36 | 0.52 | Transcribed locus, weakly similar to NP_001042618.1 [Oryza sativa (japonica cultivar-group)]                                    |
| Les.369.1.S1_at       | AF059489.1 | TC21922 | 2377 | 836  | 2268 | 0.35 | 0.95 | expansin                                                                                                                        |
| Les.6.1.S1_at         | AF261141.1 | TC22389 | 1181 | 414  | 512  | 0.35 | 0.43 | hypothetical LOC543656                                                                                                          |
| Les.1205.1.A1_at      | BG630057   | TC21911 | 934  | 325  | 278  | 0.35 | 0.3  | Transcribed locus, weakly similar to NP_001059455.1 [Oryza sativa (japonica cultivar-group)]                                    |
| Les.4529.1.S1_at      | AY497478.1 | TC21903 | 1468 | 508  | 281  | 0.35 | 0.19 | xyloglucan endotransglucosylase-hydrolase XTH7                                                                                  |
| LesAffx.71035.1.S1_at | BI207404   | TC23510 | 796  | 276  | 824  | 0.35 | 1.03 | Transcribed locus, weakly similar to NP_179716.1 protein [Arabidopsis thaliana]                                                 |
| Les.3552.1.A1_at      | AF081021.1 | TC24327 | 57   | 19   | 30   | 0.34 | 0.53 | hypoxia-induced protein 242                                                                                                     |
| Les.4549.1.S1_at      | BT013085.1 | TC24365 | 182  | 62   | 73   | 0.34 | 0.4  | Lycopersicon esculentum clone 114349R, mRNA sequence                                                                            |
| LesAffx.10497.2.S1_at | AI897776   | TC24435 | 853  | 288  | 373  | 0.34 | 0.44 | Transcribed locus, weakly similar to NP_001042618.1 [Oryza sativa (japonica cultivar-group)]                                    |
| Les.4938.1.S1_at      | BT012940.1 | TC22310 | 628  | 212  | 247  | 0.34 | 0.39 | Lycopersicon esculentum clone 114108R, mRNA sequence                                                                            |
| Les.4749.1.S1_at      | BT013546.1 | AI77484 | 842  | 280  | 597  | 0.33 | 0.71 | Lycopersicon esculentum clone 132267F, mRNA sequence                                                                            |
| LesAffx.64757.1.A1_at | AI490042   | TC22570 | 683  | 227  | 375  | 0.33 | 0.55 | Transcribed locus                                                                                                               |



|                       |            |         |      |      |      |      |      |                                                                                                                                 |
|-----------------------|------------|---------|------|------|------|------|------|---------------------------------------------------------------------------------------------------------------------------------|
| LesAffx.41816.1.S1_at | AW649474   | TC22094 | 300  | 99   | 229  | 0.33 | 0.76 | Transcribed locus, weakly similar to XP_001102886.1 hexosaminidase B isoform 1 [Macaca mulatta]                                 |
| LesAffx.3099.1.S1_at  | CK574995   | GO37548 | 5316 | 1733 | 1247 | 0.33 | 0.23 | Transcribed locus, moderately similar to NP_001044625.1 [Oryza sativa (japonica cultivar-group)]                                |
| LesAffx.56.4.S1_at    | BG128707   | TC22262 | 311  | 100  | 139  | 0.32 | 0.45 | Transcribed locus, weakly similar to XP_001087943.1 similar to carboxypeptidase, vitellogenic-like isoform 4 [Macaca mulatta]   |
| Les.1959.1.A1_at      | BG630503   | TC23129 | 139  | 45   | 71   | 0.32 | 0.51 | Transcribed locus                                                                                                               |
| Les.4731.1.S1_at      | BT013577.1 | TC23297 | 3148 | 952  | 2661 | 0.3  | 0.85 | Lycopersicon esculentum clone 132322R, mRNA sequence                                                                            |
| Les.2325.1.S1_at      | BG625896   | TC22401 | 834  | 249  | 337  | 0.3  | 0.4  | yfe37 protein                                                                                                                   |
| Les.1714.1.A1_at      | BG628281   | TC24400 | 550  | 164  | 263  | 0.3  | 0.48 | Transcribed locus                                                                                                               |
| Les.5664.1.S1_at      | BT014348.1 | AW03195 | 525  | 156  | 665  | 0.3  | 1.27 | Lycopersicon esculentum clone 133623F, mRNA sequence                                                                            |
| Les.852.1.A1_at       | BG627744   | TC24030 | 117  | 35   | 34   | 0.3  | 0.29 | Transcribed locus                                                                                                               |
| Les.1614.1.A1_at      | BG628742   | TC23793 | 386  | 112  | 157  | 0.29 | 0.41 | Transcribed locus, moderately similar to NP_001049792.1 [Oryza sativa (japonica cultivar-group)]                                |
| Les.4594.1.S1_at      | BT012739.1 | TC23704 | 2671 | 757  | 1627 | 0.28 | 0.61 | Lycopersicon esculentum clone 113677R, mRNA sequence                                                                            |
| Les.4473.1.S1_at      | AJ606077.1 | TC22116 | 301  | 85   | 364  | 0.28 | 1.21 | spe4 protein                                                                                                                    |
| LesAffx.13252.1.S1_at | BI929109   | TC22202 | 1288 | 359  | 362  | 0.28 | 0.28 | Transcribed locus, weakly similar to NP_001042395.1 [Oryza sativa (japonica cultivar-group)]                                    |
| Les.3069.1.S1_at      | BG630752   | TC21938 | 830  | 228  | 531  | 0.27 | 0.64 | Lycopersicon esculentum clone 132988F, mRNA sequence                                                                            |
| Les.3733.1.S1_at      | AF096776.1 | TC21836 | 933  | 245  | 569  | 0.26 | 0.61 | expansin                                                                                                                        |
| LesAffx.70738.1.A1_at | BG630069   | TC23199 | 488  | 120  | 122  | 0.25 | 0.25 | Transcribed locus, weakly similar to XP_001101267.1 similar to myeloblastosis proto-oncogene product isoform 2 [Macaca mulatta] |
| LesAffx.13252.2.S1_at | BG124820   | TC22202 | 800  | 196  | 186  | 0.25 | 0.23 | Transcribed locus, weakly similar to NP_001042395.1 [Oryza sativa (japonica cultivar-group)]                                    |
| LesAffx.13252.2.A1_at | BG124820   | TC22202 | 237  | 57   | 64   | 0.24 | 0.27 | Transcribed locus, weakly similar to NP_001042395.1 [Oryza sativa (japonica cultivar-group)]                                    |
| Les.5941.1.A1_at      | CK715706   | TC22893 | 1477 | 351  | 1097 | 0.24 | 0.74 | Transcribed locus, weakly similar to NP_001042315.1 [Oryza sativa (japonica cultivar-group)]                                    |
| Les.9.1.S1_at         | AB010992.1 | TC22813 | 1614 | 368  | 482  | 0.23 | 0.3  | 3b-hydroxylase                                                                                                                  |
| Les.406.1.A1_at       | BG629308   | TC24082 | 1036 | 204  | 297  | 0.2  | 0.29 | Transcribed locus, weakly similar to NP_196850.1 binding [Arabidopsis thaliana]                                                 |
| LesAffx.1251.1.S1_at  | BG125851   | BG12585 | 307  | 51   | 204  | 0.17 | 0.66 | ---                                                                                                                             |
