# Supplementary material for: Transcriptome Analysis of Tomato Flower Pedicel Tissues Reveals Abscission Zone-Specific Modulation of Key Meristem Activity Genes
Source: PubMed Central journal article supplement (PMC3563536; doi:10.1371/journal.pone.0055238), 2013-02-04
Supplement: pone.0055238.s007.pdf [file pone.0055238.s007.pdf]

**Table S5.** Differentially expressed genes in the apical portion after 3 h and/or 6 h of ethylene treatment.

| Affymetrix Probe Set ID | GenBank Accession | Tomato Gene Index | 0AP  | 3AP   | 6AP   | 3AP/0AP | 6AP/0AP | GenBank Annotation                                                                                                                       |
|-------------------------|-------------------|-------------------|------|-------|-------|---------|---------|------------------------------------------------------------------------------------------------------------------------------------------|
| Les.4885.1.S1_at        | BT012835.1        | TC24138           | 136  | 2376  | 1202  | 17.48   | 8.84    | Lycopersicon esculentum clone 113896R, mRNA sequence                                                                                     |
| Les.113.1.S1_at         | CN384955          | TC23130           | 443  | 4256  | 6495  | 9.6     | 14.64   | CDNA, clone: FC02BG03, HTC in fruit                                                                                                      |
| LesAffx.56389.1.S1_at   | AW034707          | TC23934           | 81   | 666   | 2651  | 8.21    | 32.65   | Transcribed locus, weakly similar to NP_001033715.2 F synthase [ <i>Sus scrofa</i> ]                                                     |
| Les.3465.1.S1_at        | AY079426.1        | TC21718           | 129  | 927   | 799   | 7.18    | 6.19    | ethylene receptor-like protein                                                                                                           |
| LesAffx.56301.1.S1_at   | AI895341          | TC22182           | 597  | 3810  | 2471  | 6.38    | 4.14    | Transcribed locus, weakly similar to NP_001048145.1 [ <i>Oryza sativa</i> (japonica cultivar-group)]                                     |
| Les.3712.1.S1_at        | AF154003.1        | TC24028           | 565  | 3223  | 3549  | 5.7     | 6.28    | pirin                                                                                                                                    |
| LesAffx.54536.1.S1_at   | BM409044          | TC23408           | 128  | 721   | 703   | 5.66    | 5.51    | Transcribed locus, weakly similar to NP_001046834.1 [ <i>Oryza sativa</i> (japonica cultivar-group)]                                     |
| LesAffx.13365.1.S1_at   | BM411110          | TC21920           | 542  | 2989  | 778   | 5.51    | 1.43    | Transcribed locus, weakly similar to NP_001066487.1 [ <i>Oryza sativa</i> (japonica cultivar-group)]                                     |
| LesAffx.24637.1.S1_at   | CN550618          | TC22796           | 276  | 1413  | 4587  | 5.12    | 16.63   | Transcribed locus, weakly similar to NP_001049089.1 [ <i>Oryza sativa</i> (japonica cultivar-group)]                                     |
| LesAffx.66953.1.S1_at   | AW651552          | TC23604           | 508  | 2527  | 2910  | 4.97    | 5.72    | Transcribed locus, weakly similar to NP_001042903.1 [ <i>Oryza sativa</i> (japonica cultivar-group)]                                     |
| Les.3645.1.S1_at        | U54770.1          | NP924378          | 668  | 3317  | 6227  | 4.96    | 9.32    | 6-deoxocastasterone oxidase                                                                                                              |
| LesAffx.70406.1.S1_at   | AW036249          | TC22360           | 109  | 539   | 1056  | 4.93    | 9.66    | Transcribed locus, weakly similar to XP_001114236.1 branched chain aminotransferase 2, mitochondrial isoform 2 [ <i>Macaca mulatta</i> ] |
| Les.2899.1.S1_at        | BG628131          | TC22810           | 2384 | 11063 | 8998  | 4.64    | 3.77    | Transcribed locus, weakly similar to XP_001108862.1 cathepsin H isoform 2 [ <i>Macaca mulatta</i> ]                                      |
| LesAffx.69349.2.S1_at   | AW623862          | AW62386           | 214  | 955   | 1041  | 4.47    | 4.87    | Transcribed locus, weakly similar to NP_001043801.1 [ <i>Oryza sativa</i> (japonica cultivar-group)]                                     |
| Les.4443.1.A1_s_at      | BG630528          | TC21730           | 928  | 4136  | 6638  | 4.46    | 7.16    | 6-deoxocastasterone oxidase                                                                                                              |
| Les.4287.1.S1_at        | CB751564          | TC21784           | 1045 | 4642  | 6634  | 4.44    | 6.35    | Transcribed locus, weakly similar to XP_001094505.1 proteasome 26S non-ATPase subunit 3 isoform 4 [ <i>Macaca mulatta</i> ]              |
| LesAffx.63659.1.S1_at   | BI921813          | TC22794           | 380  | 1633  | 2849  | 4.3     | 7.51    | Transcribed locus, weakly similar to NP_001047062.1 [ <i>Oryza sativa</i> (japonica cultivar-group)]                                     |
| LesAffx.50112.1.S1_at   | AI898985          | TC23361           | 524  | 2248  | 3667  | 4.29    | 7       | Transcribed locus, weakly similar to NP_001047062.1 [ <i>Oryza sativa</i> (japonica cultivar-group)]                                     |
| Les.132.1.S1_at         | X58885.1          | TC21743           | 2652 | 11261 | 11802 | 4.25    | 4.45    | ethylene-forming enzyme                                                                                                                  |
| LesAffx.9910.1.S1_at    | CN385590          | TC22147           | 394  | 1669  | 2163  | 4.23    | 5.49    | Transcribed locus, weakly similar to NP_001046094.1 [ <i>Oryza sativa</i> (japonica cultivar-group)]                                     |

|                         |            |         |      |      |       |      |      |                                                                                                                               |
|-------------------------|------------|---------|------|------|-------|------|------|-------------------------------------------------------------------------------------------------------------------------------|
| Les.2084.1.S1_at        | BF097539   | TC22764 | 372  | 1539 | 1802  | 4.14 | 4.84 | Transcribed locus, weakly similar to NP_001041763.1 [Oryza sativa (japonica cultivar-group)]                                  |
| LesAffx.15921.1.S1_at   | BM412286   | TC23758 | 473  | 1900 | 1903  | 4.02 | 4.03 | Transcribed locus, weakly similar to NP_001057315.1 [Oryza sativa (japonica cultivar-group)]                                  |
| LesAffx.64582.2.A1_at   | AI490624   | TC24338 | 54   | 215  | 141   | 3.96 | 2.59 | ---                                                                                                                           |
| Les.1524.1.A1_at        | BG626458   | BG62645 | 322  | 1275 | 1097  | 3.96 | 3.41 | Transcribed locus                                                                                                             |
| LesAffx.37563.1.S1_at   | Z70216.1   | TC23549 | 61   | 237  | 103   | 3.89 | 1.69 | ---                                                                                                                           |
| Les.2899.2.S1_at        | BM536145   | TC22810 | 992  | 3859 | 3060  | 3.89 | 3.08 | Transcribed locus, weakly similar to XP_001108862.1 cathepsin H isoform 2 [Macaca mulatta]                                    |
| Les.5442.1.S1_at        | BT013931.1 | TC22814 | 385  | 1497 | 2777  | 3.88 | 7.21 | Lycopersicon esculentum clone 132929R, mRNA sequence                                                                          |
| Les.4055.1.S1_at        | BM536050   | TC23122 | 112  | 427  | 436   | 3.8  | 3.89 | Lycopersicon esculentum (DB222) meloidogyne-induced giant cell protein mRNA, 3' end                                           |
| Les.4307.1.S1_at        | AY257487.1 | TC21819 | 2647 | 9970 | 10398 | 3.77 | 3.93 | PR5-like protein                                                                                                              |
| Les.5126.1.S1_at        | BT013336.1 | TC22310 | 240  | 894  | 1809  | 3.73 | 7.54 | Lycopersicon esculentum clone 135126R, mRNA sequence                                                                          |
| LesAffx.58502.1.S1_at   | BM412364   | TC22738 | 421  | 1567 | 886   | 3.72 | 2.1  | Transcribed locus, weakly similar to NP_001042057.1 [Oryza sativa (japonica cultivar-group)]                                  |
| Les.244.2.S1_a_at       | AI485696   | TC22935 | 298  | 1096 | 1049  | 3.68 | 3.53 | Calmodulin                                                                                                                    |
| Les.3683.1.S1_at        | AY093595.1 | TC24086 | 261  | 956  | 1187  | 3.66 | 4.54 | PR-5x                                                                                                                         |
| LesAffx.64582.1.S1_at   | AI894448   | TC24338 | 141  | 510  | 349   | 3.62 | 2.48 | ---                                                                                                                           |
| LesAffx.33607.1.S1_s_at | AW223067   | TC23890 | 410  | 1475 | 1444  | 3.6  | 3.52 | Calmodulin                                                                                                                    |
| Les.423.1.S1_at         | BM409421   | TC22953 | 976  | 3493 | 3886  | 3.58 | 3.98 | CDNA, clone: FC09CF07, HTC in fruit                                                                                           |
| LesAffx.63489.1.S1_at   | BI921137   | TC22082 | 654  | 2341 | 879   | 3.58 | 1.34 | Transcribed locus, weakly similar to XP_001117063.1 transmembrane BAX inhibitor motif containing 4 isoform 1 [Macaca mulatta] |
| LesAffx.33607.2.S1_s_at | AI775872   | TC23890 | 1015 | 3632 | 3683  | 3.58 | 3.63 | Calmodulin                                                                                                                    |
| Les.1046.1.S1_at        | X72730.1   | TC22785 | 315  | 1122 | 1067  | 3.56 | 3.39 | (ERT 10) ripening-related mRNA                                                                                                |
| LesAffx.22583.1.S1_at   | AI484022   | TC23670 | 216  | 755  | 725   | 3.5  | 3.36 | Transcribed locus, weakly similar to NP_001044974.1 [Oryza sativa (japonica cultivar-group)]                                  |
| Les.796.1.A1_at         | BG627506   | TC22633 | 145  | 501  | 994   | 3.44 | 6.84 | Transcribed locus, weakly similar to NP_001043676.1 [Oryza sativa (japonica cultivar-group)]                                  |
| LesAffx.57163.2.S1_at   | BI421649   | TC22802 | 114  | 388  | 64    | 3.39 | 0.56 | Transcribed locus, weakly similar to NP_001044707.1 [Oryza sativa (japonica cultivar-group)]                                  |
| Les.2591.1.S1_at        | M80608.1   |         | 1087 | 3649 | 6411  | 3.36 | 5.9  | beta-1,3-glucanase                                                                                                            |
| Les.4223.1.S1_at        | AY034148.1 | TC21729 | 363  | 1169 | 1344  | 3.22 | 3.7  | alternative oxidase 1a                                                                                                        |
| LesAffx.3467.1.S1_at    | CN384781   | TC23179 | 554  | 1699 | 1930  | 3.07 | 3.48 | Transcribed locus, weakly similar to NP_001047645.1 [Oryza sativa (japonica cultivar-group)]                                  |

|                         |            |         |      |      |      |      |       |                                                                                                                                                                                                                             |
|-------------------------|------------|---------|------|------|------|------|-------|-----------------------------------------------------------------------------------------------------------------------------------------------------------------------------------------------------------------------------|
| LesAffx.63739.1.S1_at   | AW033134   | TC21965 | 104  | 317  | 395  | 3.04 | 3.79  | Transcribed locus, weakly similar to NP_001043665.1 [Oryza sativa (japonica cultivar-group)]                                                                                                                                |
| Les.4999.1.A1_at        | BT013077.1 | TC23341 | 299  | 907  | 781  | 3.04 | 2.62  | Lycopersicon esculentum clone 114334F, mRNA sequence                                                                                                                                                                        |
| LesAffx.30544.1.S1_at   | AI489986   | TC24194 | 1128 | 3404 | 3828 | 3.02 | 3.39  | ---                                                                                                                                                                                                                         |
| LesAffx.30544.1.A1_at   | AI489986   | TC24194 | 427  | 1283 | 1388 | 3    | 3.25  | ---                                                                                                                                                                                                                         |
| LesAffx.68306.1.S1_at   | BE461086   | TC23074 | 108  | 324  | 137  | 3    | 1.27  | Transcribed locus, weakly similar to NP_001055605.1 [Oryza sativa (japonica cultivar-group)]                                                                                                                                |
| LesAffx.47221.1.S1_at   | AW033464   | AW03346 | 1056 | 3158 | 3833 | 2.99 | 3.63  | Transcribed locus, weakly similar to NP_001041994.1 [Oryza sativa (japonica cultivar-group)]                                                                                                                                |
| Les.4483.1.S1_at        | AY498713.1 | TC21812 | 605  | 1802 | 1519 | 2.98 | 2.51  | NAC domain protein                                                                                                                                                                                                          |
| LesAffx.59769.1.S1_at   | BI203677   | TC23621 | 804  | 2387 | 3826 | 2.97 | 4.76  | ---                                                                                                                                                                                                                         |
| LesAffx.64741.1.S1_at   | AI775317   | TC22074 | 1088 | 3210 | 3433 | 2.95 | 3.16  | Transcribed locus, weakly similar to XP_001103467.1 similar to 3-hydroxyisobutyryl-Coenzyme A hydrolase isoform 1 [Macaca mulatta]                                                                                          |
| LesAffx.56596.1.S1_at   | AW036395   | AW03639 | 44   | 129  | 114  | 2.95 | 2.61  | ---                                                                                                                                                                                                                         |
| Les.3668.1.S1_at        | U09026.1   | TC21838 | 89   | 261  | 497  | 2.95 | 5.61  | lipoygenase                                                                                                                                                                                                                 |
| LesAffx.71606.1.S1_s_at | AI896002   | TC24027 | 1348 | 3965 | 3500 | 2.94 | 2.6   | Lycopersicon esculentum clone 114334F, mRNA sequence                                                                                                                                                                        |
| LesAffx.61149.1.S1_at   | BE460847   | TC24084 | 262  | 763  | 1473 | 2.91 | 5.61  | Transcribed locus, weakly similar to NP_001042177.1 [Oryza sativa (japonica cultivar-group)]                                                                                                                                |
| LesAffx.43198.1.S1_at   | BF113993   | BF11399 | 134  | 388  | 463  | 2.9  | 3.45  | Transcribed locus, weakly similar to NP_001045064.1 [Oryza sativa (japonica cultivar-group)]                                                                                                                                |
| LesAffx.124.1.S1_at     | AW443936   | TC23232 | 41   | 118  | 139  | 2.89 | 3.4   | CDNA, clone: FC20CD10, HTC in fruit                                                                                                                                                                                         |
| Les.3646.1.S1_at        | U70481.1   | TC21735 | 14   | 41   | 173  | 2.89 | 12.26 | abscission polygalacturonase                                                                                                                                                                                                |
| LesAffx.47179.1.S1_at   | BM411655   | TC24073 | 653  | 1884 | 970  | 2.89 | 1.49  | Transcribed locus, weakly similar to NP_010015.2 serine/threonine protein kinase most similar to cyclic nucleotide-dependent protein kinase subfamily and the protein kinase C subfamily; Kin82p [Saccharomyces cerevisiae] |
| Les.3752.1.S1_at        | AW036285   | NP16439 | 87   | 250  | 141  | 2.87 | 1.62  | CDNA, clone: FC23CF12, HTC in fruit                                                                                                                                                                                         |
| Les.3383.1.S1_at        | BI208081   | TC22532 | 745  | 2134 | 1169 | 2.86 | 1.57  | Transcribed locus, weakly similar to XP_001118353.1 similar to olfactory specific medium-chain acyl CoA synthetase [Macaca mulatta]                                                                                         |
| Les.2137.1.S1_at        | AY359965.1 | TC21714 | 732  | 2096 | 2411 | 2.86 | 3.29  | EIX receptor 1                                                                                                                                                                                                              |
| LesAffx.3467.1.A1_at    | CN384781   | TC23179 | 257  | 729  | 776  | 2.84 | 3.02  | Transcribed locus, weakly similar to NP_001047645.1 [Oryza sativa (japonica cultivar-group)]                                                                                                                                |
| Les.702.1.S1_at         | BG627003   | TC21772 | 1100 | 3118 | 1998 | 2.84 | 1.82  | Lycopersicon esculentum clone 134862F, mRNA sequence                                                                                                                                                                        |
| Les.217.1.S1_at         | AF243180.1 | TC22069 | 499  | 1404 | 1814 | 2.81 | 3.63  | dicyanin                                                                                                                                                                                                                    |
| LesAffx.70522.1.S1_at   | BI423015   | TC23029 | 414  | 1144 | 1269 | 2.76 | 3.07  | Transcribed locus, weakly similar to NP_001055496.1 [Oryza sativa (japonica cultivar-group)]                                                                                                                                |
| Les.5091.1.S1_at        | BT013255.1 | TC22888 | 203  | 557  | 401  | 2.74 | 1.98  | Lycopersicon esculentum clone 134773R, mRNA sequence                                                                                                                                                                        |

|                       |            |         |      |      |      |      |      |                                                                                                  |
|-----------------------|------------|---------|------|------|------|------|------|--------------------------------------------------------------------------------------------------|
| Les.3619.1.S1_at      | J04099.1   | TC23203 | 2564 | 6966 | 8264 | 2.72 | 3.22 | proteinase inhibitor I                                                                           |
| Les.3735.1.S1_at      | AY007561.1 | TC22594 | 166  | 450  | 672  | 2.72 | 4.05 | hypothetical LOC543816                                                                           |
| LesAffx.64990.1.S1_at | BI422984   | TC21791 | 441  | 1188 | 1001 | 2.7  | 2.27 | Transcribed locus, weakly similar to NP_001051696.1 [Oryza sativa (japonica cultivar-group)]     |
| Les.3486.1.S1_at      | AF416289.1 | TC22056 | 910  | 2449 | 3009 | 2.69 | 3.31 | auxin-regulated protein                                                                          |
| LesAffx.56802.1.S1_at | BI423210   | TC21932 | 894  | 2401 | 4008 | 2.69 | 4.48 | Transcribed locus, weakly similar to NP_001044900.1 [Oryza sativa (japonica cultivar-group)]     |
| LesAffx.20450.1.S1_at | AW223514   | TC21776 | 2151 | 5730 | 4550 | 2.66 | 2.12 | Transcribed locus, weakly similar to NP_001042868.1 [Oryza sativa (japonica cultivar-group)]     |
| Les.2212.1.A1_at      | BG735110   | BG73511 | 117  | 310  | 266  | 2.66 | 2.28 | Lycopersicon esculentum clone 133400R, mRNA sequence                                             |
| LesAffx.57163.3.A1_at | AI486803   | TC22802 | 61   | 164  | 46   | 2.66 | 0.75 | Transcribed locus, weakly similar to NP_001042186.1 [Oryza sativa (japonica cultivar-group)]     |
| LesAffx.17387.1.S1_at | BM534931   | BM53493 | 259  | 682  | 1245 | 2.63 | 4.8  | ---                                                                                              |
| LesAffx.66354.1.S1_at | AI773917   | TC22427 | 65   | 169  | 118  | 2.62 | 1.83 | Transcribed locus, weakly similar to NP_001057807.1 [Oryza sativa (japonica cultivar-group)]     |
| LesAffx.69783.1.S1_at | AW220917   | TC23448 | 1210 | 3165 | 3428 | 2.61 | 2.83 | Transcribed locus, weakly similar to NP_001067067.1 [Oryza sativa (japonica cultivar-group)]     |
| Les.244.2.S1_at       | AI485696   | TC22935 | 134  | 348  | 375  | 2.6  | 2.8  | Calmodulin                                                                                       |
| Les.91.1.S1_at        | Z97215.1   | TC22836 | 549  | 1422 | 1461 | 2.59 | 2.66 | nine-cis-epoxycarotenoid dioxygenase                                                             |
| Les.3545.1.S1_at      | Y14809.1   | TC22310 | 985  | 2541 | 1684 | 2.58 | 1.71 | beta-carotene hydroxylase                                                                        |
| Les.4264.1.A1_s_at    | L24012.1   | TC22590 | 206  | 526  | 455  | 2.56 | 2.21 | gamma-aminobutyrate transaminase subunit precursor isozyme 3                                     |
| Les.31.1.S1_s_at      | AF110518.1 | NP00011 | 711  | 1816 | 1198 | 2.55 | 1.68 | ethylene-inducible CTR1-like protein kinase                                                      |
| Les.2667.2.S1_at      | AW621251   | TC22610 | 1562 | 3987 | 4038 | 2.55 | 2.58 | Transcribed locus, weakly similar to NP_001042221.1 [Oryza sativa (japonica cultivar-group)]     |
| Les.3818.1.S1_at      | AF502085.1 | TC21752 | 39   | 99   | 123  | 2.53 | 3.15 | ethylene responsive element binding protein                                                      |
| LesAffx.58497.1.S1_at | BM411367   | TC23480 | 40   | 100  | 141  | 2.53 | 3.54 | ---                                                                                              |
| Les.3667.1.S1_at      | U13054.1   | TC21851 | 733  | 1853 | 4922 | 2.53 | 6.72 | endo-1,4-beta-glucanase precursor                                                                |
| Les.4335.2.S1_at      | AW931003   | TC22074 | 683  | 1721 | 1288 | 2.52 | 1.89 | Pathogenesis-related protein P2                                                                  |
| Les.5339.1.S1_at      | BT013735.1 | TC23231 | 682  | 1705 | 2841 | 2.5  | 4.17 | Lycopersicon esculentum clone 132595F, mRNA sequence                                             |
| Les.4999.1.S1_at      | BT013077.1 | TC23341 | 1978 | 4895 | 4582 | 2.47 | 2.32 | Lycopersicon esculentum clone 114334F, mRNA sequence                                             |
| LesAffx.22026.1.S1_at | AW218437   | TC23971 | 877  | 2148 | 2112 | 2.45 | 2.41 | Transcribed locus, weakly similar to NP_001043479.1 [Oryza sativa (japonica cultivar-group)]     |
| Les.2560.1.S1_at      | CN384809   | TC22909 | 2172 | 5319 | 6149 | 2.45 | 2.83 | gene product (aa 1-295)                                                                          |
| LesAffx.3299.1.S1_at  | AI486708   | TC23796 | 178  | 435  | 185  | 2.44 | 1.04 | Transcribed locus, weakly similar to NP_194461.1 factor/ zinc ion binding [Arabidopsis thaliana] |

|                       |            |         |      |      |      |      |      |                                                                                                                                                                              |
|-----------------------|------------|---------|------|------|------|------|------|------------------------------------------------------------------------------------------------------------------------------------------------------------------------------|
| LesAffx.56070.1.S1_at | BF113259   | TC23846 | 300  | 733  | 631  | 2.44 | 2.1  | Transcribed locus, weakly similar to NP_001043915.1 [Oryza sativa (japonica cultivar-group)]                                                                                 |
| Les.2344.1.A1_at      | BG631466   | TC23883 | 5    | 13   | 10   | 2.44 | 1.91 | Transcribed locus                                                                                                                                                            |
| LesAffx.65156.1.A1_at | CD003450   | TC23971 | 21   | 50   | 75   | 2.44 | 3.64 | Transcribed locus                                                                                                                                                            |
| Les.1020.1.A1_at      | BG628781   | TC23783 | 340  | 829  | 746  | 2.44 | 2.19 | Transcribed locus, weakly similar to XP_001108540.1 similar to phosphatidylinositol-3-phosphate/phosphatidylinositol 5-kinase, type III isoform 2 isoform 4 [Macaca mulatta] |
| LesAffx.29757.2.S1_at | AI898522   | TC23303 | 1062 | 2578 | 4035 | 2.43 | 3.8  | Transcribed locus, moderately similar to NP_001062087.1 [Oryza sativa (japonica cultivar-group)]                                                                             |
| Les.5530.1.S1_at      | BT014086.1 | TC23075 | 637  | 1539 | 1987 | 2.42 | 3.12 | Lycopersicon esculentum clone 133190R, mRNA sequence                                                                                                                         |
| LesAffx.47116.1.S1_at | AW224087   | TC23403 | 1031 | 2487 | 2725 | 2.41 | 2.64 | Transcribed locus, weakly similar to XP_001089495.1 cystinosis, nephropathic isoform 1 [Macaca mulatta]                                                                      |
| Les.546.1.A1_at       | AY157063.1 | TC22025 | 747  | 1797 | 2131 | 2.41 | 2.85 | WRKY transcription factor IId-4                                                                                                                                              |
| Les.1617.3.A1_s_at    | BG627478   | TC21950 | 104  | 250  | 153  | 2.41 | 1.47 | Lycopersicon esculentum clone 114145F, mRNA sequence                                                                                                                         |
| LesAffx.42260.1.S1_at | AW441621   | AW44162 | 3    | 6    | 4    | 2.4  | 1.71 | ---                                                                                                                                                                          |
| Les.5855.1.S1_at      | BT014384.1 | TC22983 | 1523 | 3651 | 4905 | 2.4  | 3.22 | Lycopersicon esculentum clone 133681F, mRNA sequence                                                                                                                         |
| Les.1899.1.A1_at      | BG630030   | TC24035 | 11   | 27   | 21   | 2.39 | 1.82 | Transcribed locus                                                                                                                                                            |
| LesAffx.62420.1.S1_at | AW218614   | TC22371 | 401  | 955  | 894  | 2.38 | 2.23 | Transcribed locus, weakly similar to NP_001042177.1 [Oryza sativa (japonica cultivar-group)]                                                                                 |
| LesAffx.29757.2.A1_at | AI898522   | TC23303 | 148  | 352  | 489  | 2.38 | 3.31 | Transcribed locus, moderately similar to NP_001062087.1 [Oryza sativa (japonica cultivar-group)]                                                                             |
| LesAffx.71623.1.S1_at | AW035747   | TC24095 | 1918 | 4554 | 5064 | 2.37 | 2.64 | Transcribed locus, weakly similar to NP_001041763.1 [Oryza sativa (japonica cultivar-group)]                                                                                 |
| LesAffx.32607.1.S1_at | BI206284   | TC23179 | 13   | 30   | 19   | 2.37 | 1.5  | ---                                                                                                                                                                          |
| LesAffx.22297.1.S1_at | AW041000   | TC21723 | 539  | 1280 | 1460 | 2.37 | 2.71 | CYP710A7 mRNA for sterol 22-desaturase                                                                                                                                       |
| LesAffx.33082.1.S1_at | BG133383   | TC23204 | 22   | 51   | 145  | 2.36 | 6.7  | ---                                                                                                                                                                          |
| LesAffx.51158.2.S1_at | AI898095   | TC23014 | 415  | 979  | 1399 | 2.36 | 3.37 | Transcribed locus, weakly similar to NP_001048008.1 [Oryza sativa (japonica cultivar-group)]                                                                                 |
| LesAffx.40648.1.S1_at | BE461455   | TC24357 | 606  | 1429 | 1392 | 2.36 | 2.3  | Transcribed locus, weakly similar to NP_001043479.1 [Oryza sativa (japonica cultivar-group)]                                                                                 |
| LesAffx.6125.1.S1_at  | CK468687   | TC22217 | 171  | 403  | 299  | 2.36 | 1.74 | Transcribed locus, weakly similar to NP_001042057.1 [Oryza sativa (japonica cultivar-group)]                                                                                 |
| LesAffx.4116.1.S1_at  | BI933542   | TC23165 | 173  | 408  | 756  | 2.35 | 4.36 | Transcribed locus, weakly similar to NP_001047564.1 [Oryza sativa (japonica cultivar-group)]                                                                                 |
| LesAffx.60006.1.S1_at | BG643009   | TC22674 | 134  | 313  | 763  | 2.34 | 5.7  | Transcribed locus, weakly similar to NP_001055441.1 [Oryza sativa (japonica cultivar-group)]                                                                                 |

|                       |            |         |      |      |      |      |      |                                                                                                                                                                              |
|-----------------------|------------|---------|------|------|------|------|------|------------------------------------------------------------------------------------------------------------------------------------------------------------------------------|
| Les.909.1.A1_at       | BG628078   | TC23979 | 21   | 50   | 100  | 2.33 | 4.69 | Transcribed locus                                                                                                                                                            |
| Les.5130.1.S1_at      | BT013342.1 | TC23433 | 272  | 633  | 818  | 2.33 | 3.01 | Lycopersicon esculentum clone 135145F, mRNA sequence                                                                                                                         |
| Les.4233.2.A1_at      | BG628148   | TC23601 | 252  | 586  | 774  | 2.32 | 3.07 | Iron superoxide dismutase                                                                                                                                                    |
| Les.5672.1.S1_at      | BT014363.1 | TC23335 | 50   | 116  | 77   | 2.32 | 1.55 | Lycopersicon esculentum clone 133649F, mRNA sequence                                                                                                                         |
| LesAffx.62232.1.S1_at | AW649113   | TC23914 | 39   | 91   | 129  | 2.32 | 3.27 | Transcribed locus, weakly similar to NP_001048167.1 [Oryza sativa (japonica cultivar-group)]                                                                                 |
| Les.1431.1.A1_at      | BG631562   | TC23902 | 298  | 690  | 1181 | 2.32 | 3.97 | Transcribed locus, moderately similar to NP_001043710.1 [Oryza sativa (japonica cultivar-group)]                                                                             |
| Les.4233.1.S1_at      | BM412148   | TC23601 | 155  | 360  | 461  | 2.32 | 2.97 | Iron superoxide dismutase                                                                                                                                                    |
| Les.1826.1.A1_at      | BG629397   | TC23561 | 173  | 401  | 636  | 2.31 | 3.67 | Transcribed locus                                                                                                                                                            |
| LesAffx.51158.1.S1_at | AI897068   | TC23014 | 446  | 1028 | 1367 | 2.3  | 3.07 | Transcribed locus, weakly similar to NP_001048008.1 [Oryza sativa (japonica cultivar-group)]                                                                                 |
| LesAffx.3299.1.A1_at  | BG130520   | TC22413 | 335  | 771  | 345  | 2.3  | 1.03 | Transcribed locus, weakly similar to NP_194461.1 factor/ zinc ion binding [Arabidopsis thaliana]                                                                             |
| LesAffx.52595.1.S1_at | AI778688   | TC22841 | 462  | 1061 | 1078 | 2.3  | 2.33 | Transcribed locus, weakly similar to XP_001103792.1 ERO1-like isoform 1 [Macaca mulatta]                                                                                     |
| Les.5091.1.A1_at      | BT013255.1 | TC22888 | 126  | 286  | 204  | 2.27 | 1.62 | Lycopersicon esculentum clone 134773R, mRNA sequence                                                                                                                         |
| Les.3396.2.S1_at      | AW221386   | TC22284 | 2157 | 4885 | 9418 | 2.27 | 4.37 | Transcribed locus, weakly similar to NP_001042402.1 [Oryza sativa (japonica cultivar-group)]                                                                                 |
| LesAffx.60693.1.S1_at | BI210284   | TC23596 | 449  | 1016 | 1185 | 2.26 | 2.64 | ---                                                                                                                                                                          |
| LesAffx.52960.1.S1_at | BI207845   | TC23617 | 313  | 706  | 1160 | 2.25 | 3.7  | ---                                                                                                                                                                          |
| Les.1020.1.A1_a_at    | BG628781   | TC23783 | 593  | 1333 | 1217 | 2.25 | 2.05 | Transcribed locus, weakly similar to XP_001108540.1 similar to phosphatidylinositol-3-phosphate/phosphatidylinositol 5-kinase, type III isoform 2 isoform 4 [Macaca mulatta] |
| Les.4067.1.S1_at      | AY240231.1 | TC22590 | 1250 | 2810 | 2459 | 2.25 | 1.97 | gamma-aminobutyrate transaminase subunit precursor isozyme 3                                                                                                                 |
| Les.2256.1.S1_at      | BT014302.1 | GO37635 | 105  | 235  | 616  | 2.25 | 5.87 | Lycopersicon esculentum clone 133553F, mRNA sequence                                                                                                                         |
| Les.4022.1.S1_at      | X94946.1   | TC21814 | 88   | 196  | 315  | 2.24 | 3.59 | proteinase inhibitor II                                                                                                                                                      |
| Les.638.1.S1_at       | BT012771.1 | TC21816 | 3065 | 6853 | 7472 | 2.24 | 2.44 | Lycopersicon esculentum clone 113749F, mRNA sequence                                                                                                                         |
| LesAffx.51158.2.A1_at | AI898095   | TC23014 | 230  | 513  | 650  | 2.23 | 2.83 | Transcribed locus, weakly similar to NP_001048008.1 [Oryza sativa (japonica cultivar-group)]                                                                                 |
| Les.220.1.S1_at       | CK716059   | TC21926 | 1275 | 2835 | 3988 | 2.22 | 3.13 | Transcribed locus, weakly similar to NP_001055699.1 [Oryza sativa (japonica cultivar-group)]                                                                                 |
| LesAffx.65156.1.S1_at | CD003450   | TC23971 | 132  | 292  | 378  | 2.22 | 2.87 | Transcribed locus                                                                                                                                                            |
| Les.5859.1.S1_at      | BT013818.1 | TC22390 | 1856 | 4118 | 4291 | 2.22 | 2.31 | Lycopersicon esculentum clone 132739F, mRNA sequence                                                                                                                         |
| LesAffx.295.2.S1_at   | AI772896   | TC22228 | 1021 | 2259 | 2965 | 2.21 | 2.91 | Transcribed locus, weakly similar to NP_001042227.1 [Oryza sativa (japonica cultivar-group)]                                                                                 |

|                       |            |         |      |      |      |      |      |                                                                                                                                               |
|-----------------------|------------|---------|------|------|------|------|------|-----------------------------------------------------------------------------------------------------------------------------------------------|
| Les.4264.1.S1_at      | L24012.1   | TC22590 | 227  | 502  | 418  | 2.21 | 1.84 | Lycopersicon esculentum (DB149) meloidogyne-induced giant cell protein mRNA, 3' end                                                           |
| Les.3543.1.S1_at      | AJ011914.1 | TC23261 | 145  | 319  | 215  | 2.2  | 1.49 | THY5 protein                                                                                                                                  |
| Les.4946.1.S1_at      | BT012957.1 | TC22395 | 110  | 243  | 163  | 2.2  | 1.48 | Lycopersicon esculentum clone 114145F, mRNA sequence                                                                                          |
| LesAffx.3379.1.A1_at  | AW039492   | TC24415 | 624  | 1368 | 1830 | 2.19 | 2.93 | Transcribed locus, moderately similar to XP_001096794.1 similar to methylcrotonoyl-Coenzyme A carboxylase 2 (beta) isoform 2 [Macaca mulatta] |
| Les.1764.2.A1_at      | BG628826   | TC23284 | 17   | 37   | 27   | 2.18 | 1.58 | Transcribed locus, weakly similar to NP_001056202.1 [Oryza sativa (japonica cultivar-group)]                                                  |
| Les.4264.1.A1_at      | L24012.1   | TC22590 | 21   | 45   | 33   | 2.18 | 1.58 | Lycopersicon esculentum (DB149) meloidogyne-induced giant cell protein mRNA, 3' end                                                           |
| Les.2988.1.S1_at      | CK715255   | TC22567 | 1399 | 3039 | 1795 | 2.17 | 1.28 | Sucrose transporter                                                                                                                           |
| LesAffx.36837.1.S1_at | AI780027   | TC23516 | 108  | 233  | 371  | 2.17 | 3.44 | Transcribed locus, weakly similar to NP_001051963.1 [Oryza sativa (japonica cultivar-group)]                                                  |
| LesAffx.295.1.S1_at   | BM408538   | TC22228 | 552  | 1192 | 1361 | 2.16 | 2.46 | Transcribed locus, weakly similar to NP_001042227.1 [Oryza sativa (japonica cultivar-group)]                                                  |
| Les.5916.1.S1_at      | AJ715788.1 | TC23545 | 442  | 955  | 1140 | 2.16 | 2.58 | anaerobic basic leucine zipper protein                                                                                                        |
| Les.5064.1.S1_at      | BT013211.1 | AI78070 | 712  | 1534 | 1082 | 2.15 | 1.52 | Lycopersicon esculentum clone 134421R, mRNA sequence                                                                                          |
| LesAffx.71065.1.S1_at | BM413117   | TC22472 | 1042 | 2241 | 2379 | 2.15 | 2.28 | Transcribed locus, weakly similar to NP_001042582.1 [Oryza sativa (japonica cultivar-group)]                                                  |
| LesAffx.735.1.S1_at   | AW217158   | TC22685 | 157  | 338  | 408  | 2.15 | 2.6  | Transcribed locus, weakly similar to NP_001042221.1 [Oryza sativa (japonica cultivar-group)]                                                  |
| Les.1189.1.A1_at      | BG629967   | BG62996 | 3    | 7    | 5    | 2.15 | 1.68 | Transcribed locus, weakly similar to NP_001062206.1 [Oryza sativa (japonica cultivar-group)]                                                  |
| Les.4948.1.S1_at      | BT012962.1 | TC23041 | 413  | 886  | 1559 | 2.15 | 3.78 | Lycopersicon esculentum clone 114152R, mRNA sequence                                                                                          |
| LesAffx.25133.1.S1_at | BI925723   | TC23184 | 446  | 949  | 1197 | 2.13 | 2.68 | Transcribed locus, weakly similar to NP_001055158.1 [Oryza sativa (japonica cultivar-group)]                                                  |
| Les.5395.1.S1_at      | BT013835.1 | TC23018 | 1445 | 3072 | 2770 | 2.13 | 1.92 | Lycopersicon esculentum clone 132792R, mRNA sequence                                                                                          |
| LesAffx.62131.1.S1_at | BE437087   | TC23252 | 787  | 1673 | 1027 | 2.12 | 1.3  | Transcribed locus, weakly similar to XP_001081745.1 similar to threonine aldolase 1 [Rattus norvegicus]                                       |
| LesAffx.12060.1.A1_at | BI204528   | TC24300 | 153  | 325  | 360  | 2.12 | 2.36 | ---                                                                                                                                           |
| Les.3396.1.A1_at      | AW224542   | TC22094 | 1485 | 3154 | 4930 | 2.12 | 3.32 | Transcribed locus, weakly similar to NP_001042402.1 [Oryza sativa (japonica cultivar-group)]                                                  |
| LesAffx.57303.1.S1_at | AW625293   | TC22186 | 490  | 1037 | 1501 | 2.12 | 3.07 | Transcribed locus, weakly similar to NP_198885.1 protein [Arabidopsis thaliana]                                                               |
| Les.4040.1.A1_at      | X83420.1   | AW09681 | 373  | 791  | 1312 | 2.12 | 3.51 | Alu I-fragment                                                                                                                                |
| LesAffx.50687.1.S1_at | AI773710   | TC22384 | 386  | 817  | 1249 | 2.11 | 3.23 | Transcribed locus, weakly similar to NP_001046905.1 [Oryza sativa (japonica cultivar-group)]                                                  |

|                       |            |         |      |      |      |      |       |                                                                                                  |
|-----------------------|------------|---------|------|------|------|------|-------|--------------------------------------------------------------------------------------------------|
| Les.3289.1.S1_at      | AY240229.1 | TC21835 | 2566 | 5391 | 5937 | 2.1  | 2.31  | gamma-aminobutyrate transaminase subunit precursor isozyme 1                                     |
| LesAffx.70414.1.S1_at | AW034339   | TC21936 | 1533 | 3213 | 2717 | 2.1  | 1.77  | Transcribed locus, weakly similar to NP_001045308.1 [Oryza sativa (japonica cultivar-group)]     |
| Les.4317.1.S1_at      | AW625684   | TC23953 | 950  | 1990 | 6525 | 2.09 | 6.87  | asparagine synthetase                                                                            |
| Les.4888.1.S1_at      | BI927238   | TC24096 | 554  | 1159 | 1136 | 2.09 | 2.05  | Lycopersicon esculentum clone 113905R, mRNA sequence                                             |
| LesAffx.51554.1.S1_at | AW093474   | GO37601 | 696  | 1452 | 816  | 2.09 | 1.17  | ---                                                                                              |
| LesAffx.68459.2.S1_at | BM411992   | TC22747 | 105  | 219  | 452  | 2.08 | 4.29  | Transcribed locus, weakly similar to NP_001051596.1 [Oryza sativa (japonica cultivar-group)]     |
| Les.5848.2.S1_at      | BM535694   | TC22461 | 155  | 322  | 211  | 2.08 | 1.36  | Transcribed locus, weakly similar to XP_001121814.1 similar to CG9009-PA [Apis mellifera]        |
| LesAffx.66163.1.S1_at | AW222774   | TC22788 | 404  | 839  | 857  | 2.08 | 2.12  | Transcribed locus, weakly similar to NP_001046543.1 [Oryza sativa (japonica cultivar-group)]     |
| Les.2667.3.S1_at      | BE433811   | TC23595 | 684  | 1416 | 1291 | 2.07 | 1.89  | Transcribed locus, weakly similar to NP_001042221.1 [Oryza sativa (japonica cultivar-group)]     |
| LesAffx.26180.1.S1_at | BG132890   | BG13289 | 272  | 557  | 1188 | 2.05 | 4.36  | ---                                                                                              |
| LesAffx.57010.1.S1_at | AI898096   | TC21847 | 336  | 685  | 769  | 2.04 | 2.29  | Transcribed locus, weakly similar to NP_001041759.1 [Oryza sativa (japonica cultivar-group)]     |
| LesAffx.31022.1.A1_at | AI897508   | TC23408 | 2932 | 5980 | 5520 | 2.04 | 1.88  | Transcribed locus, weakly similar to NP_001053420.1 [Oryza sativa (japonica cultivar-group)]     |
| Les.3869.1.S1_at      | BG626913   | TC24136 | 254  | 518  | 776  | 2.04 | 3.05  | Lycopersicon esculentum clone 133624F, mRNA sequence                                             |
| Les.2353.1.A1_at      | BG629059   | TC23606 | 18   | 36   | 24   | 2.03 | 1.36  | Transcribed locus                                                                                |
| Les.5152.1.S1_at      | BT013393.1 | TC24469 | 250  | 508  | 747  | 2.03 | 2.99  | Lycopersicon esculentum clone 135647R, mRNA sequence                                             |
| LesAffx.52437.1.S1_at | BI925563   | TC23341 | 345  | 699  | 474  | 2.03 | 1.38  | Transcribed locus, weakly similar to NP_001044627.1 [Oryza sativa (japonica cultivar-group)]     |
| Les.3526.1.S1_a_at    | AF198259.1 | TC22267 | 474  | 951  | 1064 | 2.01 | 2.24  | calmodulin-binding diacylglycerol kinase                                                         |
| Les.5958.1.S1_at      | CN384731   | TC23315 | 469  | 940  | 1308 | 2    | 2.79  | Transcribed locus, weakly similar to NP_998286.2 kinase CKM3 [Danio rerio]                       |
| LesAffx.60722.1.S1_at | AW092522   | TC22954 | 515  | 1028 | 1068 | 2    | 2.07  | Transcribed locus, weakly similar to NP_001046772.1 [Oryza sativa (japonica cultivar-group)]     |
| LesAffx.60242.1.S1_at | BI207558   | TC23660 | 318  | 635  | 746  | 2    | 2.34  | Transcribed locus, moderately similar to NP_001058564.1 [Oryza sativa (japonica cultivar-group)] |
| Les.5177.1.S1_at      | BT013446.1 | TC24190 | 28   | 43   | 910  | 1.54 | 32.93 | Lycopersicon esculentum clone 132101F, mRNA sequence                                             |
| LesAffx.59842.1.S1_at | BI205718   | TC21823 | 104  | 128  | 1997 | 1.23 | 19.21 | Transcribed locus, weakly similar to NP_001042297.1 [Oryza sativa (japonica cultivar-group)]     |
| LesAffx.8850.1.S1_at  | AW034398   | TC22181 | 52   | 81   | 667  | 1.56 | 12.85 | Subtilisin-like protease                                                                         |
| Les.1.1.S1_at         | AF154421.1 | TC21715 | 917  | 1503 | 7080 | 1.64 | 7.72  | beta-galactosidase                                                                               |
| Les.63.1.S1_at        | AF049900.1 | TC22864 | 47   | 35   | 320  | 0.74 | 6.81  | gibberellin 20-oxidase-3                                                                         |



|                       |            |         |      |      |      |      |      |                                                                                              |
|-----------------------|------------|---------|------|------|------|------|------|----------------------------------------------------------------------------------------------|
| Les.4346.1.S1_at      | AF020390.2 | TC21717 | 376  | 505  | 2547 | 1.34 | 6.77 | ss-galactosidase                                                                             |
| LesAffx.56137.1.A1_at | AI490099   | TC22599 | 81   | 136  | 472  | 1.67 | 5.79 | Transcribed locus, weakly similar to NP_001041909.1 [Oryza sativa (japonica cultivar-group)] |
| LesAffx.56137.1.S1_at | AI490099   | TC22599 | 353  | 570  | 2015 | 1.62 | 5.71 | Transcribed locus, weakly similar to NP_001041909.1 [Oryza sativa (japonica cultivar-group)] |
| LesAffx.17773.1.S1_at | BF113622   | DB69166 | 652  | 827  | 3604 | 1.27 | 5.52 | Transcribed locus, weakly similar to NP_001045544.1 [Oryza sativa (japonica cultivar-group)] |
| Les.4026.1.S1_at      | AY155579.1 | TC21731 | 566  | 787  | 2833 | 1.39 | 5    | xyloglucan-specific fungal endoglucanase inhibitor protein precursor                         |
| LesAffx.3455.2.S1_at  | CN385030   | TC23177 | 35   | 63   | 168  | 1.81 | 4.83 | Transcribed locus, weakly similar to NP_001042297.1 [Oryza sativa (japonica cultivar-group)] |
| LesAffx.34771.1.S1_at | AW930136   | AW93013 | 572  | 958  | 2729 | 1.68 | 4.77 | ---                                                                                          |
| Les.5884.1.S1_at      | CK716273   | TC21763 | 1114 | 2204 | 5316 | 1.98 | 4.77 | Transcribed locus, weakly similar to NP_173228.1 inhibitor [Arabidopsis thaliana]            |
| Les.3232.1.A1_at      | BG627277   | TC21879 | 55   | 66   | 258  | 1.2  | 4.71 | Transcribed locus, weakly similar to NP_001043730.1 [Oryza sativa (japonica cultivar-group)] |
| LesAffx.8720.1.S1_at  | BI921446   | BI92223 | 107  | 164  | 501  | 1.53 | 4.66 | Transcribed locus, weakly similar to NP_663449.2 P450-like [Mus musculus]                    |
| Les.3610.1.S1_at      | BG629712   | TC23477 | 96   | 165  | 444  | 1.72 | 4.62 | glycine rich protein                                                                         |
| Les.3575.1.S1_at      | U89256.1   | TC22509 | 45   | 83   | 207  | 1.85 | 4.62 | Pti5                                                                                         |
| Les.4693.1.S1_at      | M69247.1   | TC23231 | 95   | 161  | 441  | 1.68 | 4.61 | pathogenesis-related protein P4                                                              |
| Les.3476.1.S1_at      | AF179246.1 | TC21724 | 23   | 15   | 103  | 0.67 | 4.53 | 1-aminocyclopropane-1-carboxylate synthase 5                                                 |
| LesAffx.65135.1.S1_at | CK468698   | TC23660 | 19   | 23   | 82   | 1.26 | 4.4  | Transcribed locus                                                                            |
| LesAffx.62906.1.S1_at | BI923447   | TC23590 | 84   | 161  | 367  | 1.91 | 4.36 | Transcribed locus, weakly similar to NP_065266.1 translocase [Mus musculus]                  |
| Les.1945.1.A1_at      | BG630386   | BG63038 | 318  | 500  | 1351 | 1.57 | 4.25 | Transcribed locus                                                                            |
| LesAffx.62549.1.S1_at | AW649200   | TC24034 | 383  | 533  | 1622 | 1.39 | 4.24 | Transcribed locus, weakly similar to NP_001042875.1 [Oryza sativa (japonica cultivar-group)] |
| LesAffx.8720.2.S1_at  | AI895030   | TC22019 | 201  | 314  | 848  | 1.56 | 4.22 | Transcribed locus, weakly similar to NP_663449.2 P450-like [Mus musculus]                    |
| Les.5051.1.S1_at      | BT013182.1 | TC22934 | 132  | 260  | 546  | 1.97 | 4.14 | Lycopersicon esculentum clone 134258F, mRNA sequence                                         |
| LesAffx.68047.1.S1_at | BM535639   | TC21800 | 62   | 70   | 255  | 1.13 | 4.12 | Transcribed locus, weakly similar to NP_001043730.1 [Oryza sativa (japonica cultivar-group)] |
| LesAffx.68092.1.S1_at | BE459012   | TC22815 | 176  | 224  | 712  | 1.27 | 4.03 | Transcribed locus, weakly similar to NP_001044783.1 [Oryza sativa (japonica cultivar-group)] |
| Les.1350.1.A1_at      | BG631017   | TC24319 | 109  | 94   | 434  | 0.86 | 3.98 | Transcribed locus                                                                            |
| Les.5711.1.S1_at      | BT014429.1 | TC21831 | 199  | 302  | 776  | 1.52 | 3.9  | Lycopersicon esculentum clone 133747F, mRNA sequence                                         |
| Les.559.1.A1_at       | BG626246   | TC22601 | 217  | 380  | 841  | 1.75 | 3.88 | Transcribed locus, weakly similar to NP_001043106.1 [Oryza sativa (japonica cultivar-group)] |
| Les.5759.1.S1_at      | BM956714   | TC22993 | 305  | 422  | 1181 | 1.38 | 3.88 | Lycopersicon esculentum clone 133897F, mRNA sequence                                         |
| Les.3693.1.S1_at      | AF426174.1 | TC22813 | 15   | 18   | 57   | 1.21 | 3.82 | blind                                                                                        |

|                       |            |         |      |      |      |      |      |                                                                                                                                                            |
|-----------------------|------------|---------|------|------|------|------|------|------------------------------------------------------------------------------------------------------------------------------------------------------------|
| Les.5934.1.S1_at      | AI895164   | TC21861 | 166  | 207  | 602  | 1.25 | 3.62 | Transcribed locus, weakly similar to NP_001047927.1 [Oryza sativa (japonica cultivar-group)]                                                               |
| Les.3706.1.S1_at      | AF022014.1 | TC21953 | 333  | 453  | 1192 | 1.36 | 3.57 | IAA3 protein                                                                                                                                               |
| LesAffx.56237.1.S1_at | AW218110   | TC22223 | 183  | 175  | 649  | 0.96 | 3.54 | Transcribed locus, weakly similar to NP_001041856.1 [Oryza sativa (japonica cultivar-group)]                                                               |
| LesAffx.57437.1.S1_at | BI928709   | TC21886 | 428  | 566  | 1500 | 1.32 | 3.51 | Transcribed locus, weakly similar to NP_001042998.1 [Oryza sativa (japonica cultivar-group)]                                                               |
| LesAffx.3253.1.S1_at  | BM412445   | TC21903 | 69   | 115  | 240  | 1.67 | 3.5  | Transcribed locus, weakly similar to XP_001091435.1 similar to cytochrome P450, family 26, subfamily A, polypeptide 1 isoform 1 isoform 3 [Macaca mulatta] |
| Les.3632.1.S1_at      | U37840.1   | TC21802 | 1594 | 2394 | 5434 | 1.5  | 3.41 | lipoyxygenase                                                                                                                                              |
| Les.3583.1.A1_at      | Y15846.1   | TC22445 | 122  | 155  | 414  | 1.27 | 3.39 | TSI-1 protein                                                                                                                                              |
| Les.4040.1.S1_at      | X83420.1   | AW09681 | 1816 | 3562 | 6100 | 1.96 | 3.36 | Alu I-fragment                                                                                                                                             |
| Les.3706.1.A1_at      | AF022014.1 | TC21953 | 119  | 166  | 399  | 1.39 | 3.35 | IAA3 protein                                                                                                                                               |
| LesAffx.24042.1.S1_at | CN385197   | DB67876 | 391  | 555  | 1310 | 1.42 | 3.35 | Transcribed locus, weakly similar to NP_663449.2 P450-like [Mus musculus]                                                                                  |
| LesAffx.59592.1.S1_at | BI210118   | TC22019 | 22   | 16   | 72   | 0.72 | 3.31 | Transcribed locus, weakly similar to NP_065956.1 dehydrogenase 14 (all-trans and 9-cis) [Homo sapiens]                                                     |
| LesAffx.58326.1.A1_at | CD002272   | TC23714 | 461  | 717  | 1523 | 1.55 | 3.3  | Transcribed locus, weakly similar to NP_001042998.1 [Oryza sativa (japonica cultivar-group)]                                                               |
| LesAffx.59622.1.S1_at | BI210866   | TC22863 | 344  | 368  | 1122 | 1.07 | 3.27 | Transcribed locus, weakly similar to NP_565922.1 (EARLY FLOWERING 4) [Arabidopsis thaliana]                                                                |
| LesAffx.15986.1.S1_at | CK715617   | TC23538 | 43   | 54   | 138  | 1.26 | 3.25 | Transcribed locus, weakly similar to XP_001116334.1 myo-inositol oxygenase [Macaca mulatta]                                                                |
| LesAffx.15353.1.S1_at | BM967389   | BM96738 | 57   | 62   | 184  | 1.1  | 3.24 | Transcribed locus, weakly similar to NP_001046337.1 [Oryza sativa (japonica cultivar-group)]                                                               |
| LesAffx.62670.1.S1_at | BF113967   | TC22120 | 790  | 1051 | 2489 | 1.33 | 3.15 | Transcribed locus, weakly similar to NP_565423.1 protein [Arabidopsis thaliana]                                                                            |
| LesAffx.3455.1.S1_at  | BI421254   | TC23177 | 22   | 37   | 70   | 1.68 | 3.14 | Transcribed locus, weakly similar to NP_001042297.1 [Oryza sativa (japonica cultivar-group)]                                                               |
| Les.3042.2.S1_at      | AW934591   | BE46335 | 59   | 84   | 184  | 1.44 | 3.14 | Transcribed locus, weakly similar to NP_001062055.1 [Oryza sativa (japonica cultivar-group)]                                                               |
| LesAffx.44422.1.S1_at | AW441968   | TC21789 | 475  | 865  | 1485 | 1.82 | 3.13 | Transcribed locus, weakly similar to NP_001041874.1 [Oryza sativa (japonica cultivar-group)]                                                               |
| Les.54.1.S1_at        | AW218809   | TC22203 | 97   | 141  | 302  | 1.46 | 3.12 | PR-1a1 protein                                                                                                                                             |
| LesAffx.62690.1.S1_at | BI206793   | TC22770 | 516  | 829  | 1562 | 1.61 | 3.03 | Transcribed locus, weakly similar to NP_001043439.1 [Oryza sativa (japonica cultivar-group)]                                                               |
| Les.4625.1.S1_at      | BT013972.1 | AW03556 | 1310 | 2326 | 3957 | 1.77 | 3.02 | Lycopersicon esculentum clone 133016F, mRNA sequence                                                                                                       |
| Les.3707.1.S1_at      | AF022013.1 | TC24298 | 85   | 54   | 254  | 0.64 | 3    | IAA2 protein                                                                                                                                               |

|                       |            |         |      |      |      |      |      |                                                                                                                            |
|-----------------------|------------|---------|------|------|------|------|------|----------------------------------------------------------------------------------------------------------------------------|
| LesAffx.56797.1.S1_at | BG127803   | AW21639 | 313  | 361  | 937  | 1.15 | 2.99 | Transcribed locus, weakly similar to NP_001041856.1 [Oryza sativa (japonica cultivar-group)]                               |
| LesAffx.17017.1.S1_at | CN384671   | TC24170 | 188  | 367  | 558  | 1.96 | 2.97 | Transcribed locus, weakly similar to NP_186978.1 protein [Arabidopsis thaliana]                                            |
| Les.2341.1.A1_at      | BG734949   | BG73494 | 23   | 24   | 68   | 1.02 | 2.93 | Transcribed locus                                                                                                          |
| Les.1044.1.A1_at      | BG629030   | TC23609 | 194  | 207  | 563  | 1.07 | 2.91 | Transcribed locus                                                                                                          |
| LesAffx.51274.1.A1_at | CN385340   | TC22133 | 42   | 80   | 122  | 1.92 | 2.91 | Transcribed locus, moderately similar to NP_001044266.1 [Oryza sativa (japonica cultivar-group)]                           |
| Les.50.1.S1_at        | X79338.1   | TC22030 | 550  | 682  | 1595 | 1.24 | 2.9  | ribonuclease                                                                                                               |
|                       |            |         | 3    | 4    | 8    | 1.62 | 2.89 | ---                                                                                                                        |
| Les.3415.3.S1_at      | AI779314   | TC24218 | 1568 | 1287 | 4507 | 0.82 | 2.87 | CDNA, clone: FC24DE01, HTC in fruit                                                                                        |
| Les.2708.1.S1_at      | BG734625   | TC21907 | 2283 | 4124 | 6556 | 1.81 | 2.87 | Transcribed locus, moderately similar to NP_001044464.1 [Oryza sativa (japonica cultivar-group)]                           |
| LesAffx.51274.1.S1_at | CN385340   | TC22133 | 155  | 299  | 444  | 1.93 | 2.87 | Transcribed locus, moderately similar to NP_001044266.1 [Oryza sativa (japonica cultivar-group)]                           |
| LesAffx.344.10.S1_at  | AI773570   | AI77357 | 1123 | 1806 | 3195 | 1.61 | 2.84 | Transcribed locus, weakly similar to XP_001089325.1 similar to cellular repressor of E1A-stimulated genes [Macaca mulatta] |
| Les.2026.1.S1_at      | BF051105   | TC22543 | 673  | 922  | 1908 | 1.37 | 2.83 | Transcribed locus, weakly similar to NP_001047542.1 [Oryza sativa (japonica cultivar-group)]                               |
| Les.1397.1.A1_at      | BG631327   | BG63132 | 914  | 761  | 2567 | 0.83 | 2.81 | Transcribed locus, weakly similar to NP_001042152.1 [Oryza sativa (japonica cultivar-group)]                               |
| Les.2026.2.A1_at      | BG631061   | TC22543 | 305  | 439  | 850  | 1.44 | 2.79 | Transcribed locus, weakly similar to NP_001047542.1 [Oryza sativa (japonica cultivar-group)]                               |
| LesAffx.41862.1.S1_at | AW650745   | TC22822 | 305  | 356  | 836  | 1.17 | 2.74 | Transcribed locus, weakly similar to NP_001042874.1 [Oryza sativa (japonica cultivar-group)]                               |
| LesAffx.62690.2.S1_at | CD003021   | CD00302 | 992  | 1489 | 2704 | 1.5  | 2.73 | Transcribed locus, weakly similar to NP_001043439.1 [Oryza sativa (japonica cultivar-group)]                               |
| LesAffx.56797.2.S1_at | BI922633   | TC22427 | 533  | 633  | 1432 | 1.19 | 2.68 | Transcribed locus, weakly similar to NP_001041856.1 [Oryza sativa (japonica cultivar-group)]                               |
| LesAffx.3244.2.S1_at  | CD002790   | TC22222 | 438  | 644  | 1172 | 1.47 | 2.67 | Transcribed locus, weakly similar to NP_001045327.1 [Oryza sativa (japonica cultivar-group)]                               |
| Les.129.1.S1_at       | AF317515.1 | TC21823 | 38   | 68   | 101  | 1.81 | 2.67 | divinyl ether synthase                                                                                                     |
| LesAffx.64333.1.S1_at | CN384866   | TC21750 | 2898 | 2047 | 7730 | 0.71 | 2.67 | Transcribed locus, weakly similar to NP_565383.1 protein [Arabidopsis thaliana]                                            |
| Les.2859.2.A1_at      | BG735561   | TC21767 | 784  | 1347 | 2084 | 1.72 | 2.66 | Transcribed locus, weakly similar to NP_001042083.1 [Oryza sativa (japonica cultivar-group)]                               |
| Les.4254.1.S1_at      | BG631257   | TC24002 | 2565 | 4444 | 6818 | 1.73 | 2.66 | Transcribed locus, moderately similar to NP_001061342.1 [Oryza sativa (japonica cultivar-group)]                           |

|                       |            |         |      |      |      |      |      |                                                                                                                                                                     |
|-----------------------|------------|---------|------|------|------|------|------|---------------------------------------------------------------------------------------------------------------------------------------------------------------------|
| LesAffx.269.2.S1_at   | AW039256   | TC22480 | 1115 | 2216 | 2959 | 1.99 | 2.66 | Transcribed locus, weakly similar to XP_001082734.1 ATP-binding cassette, sub-family B, member 10 [Macaca mulatta]                                                  |
| Les.4222.1.S1_at      | AY034149.1 | TC21756 | 130  | 235  | 344  | 1.8  | 2.65 | alternative oxidase 1b                                                                                                                                              |
| Les.2759.1.S1_at      | AW096587   | TC22503 | 2598 | 4037 | 6845 | 1.55 | 2.64 | Transcribed locus, strongly similar to NP_001042468.1 [Oryza sativa (japonica cultivar-group)]                                                                      |
| LesAffx.69647.2.S1_at | AI774131   | TC24417 | 326  | 345  | 855  | 1.06 | 2.62 | ---                                                                                                                                                                 |
| LesAffx.62690.2.A1_at | CD003021   | CD00302 | 270  | 422  | 701  | 1.56 | 2.6  | Transcribed locus, weakly similar to NP_001043439.1 [Oryza sativa (japonica cultivar-group)]                                                                        |
| Les.5567.1.S1_at      | BT014164.1 | TC22700 | 989  | 1080 | 2554 | 1.09 | 2.58 | Lycopersicon esculentum clone 133286F, mRNA sequence                                                                                                                |
| LesAffx.61848.1.S1_at | BG131606   | TC23542 | 1030 | 1414 | 2653 | 1.37 | 2.58 | Transcribed locus, weakly similar to XP_526649.2 similar to cytochrome P450 [Pan troglodytes]                                                                       |
| Les.45.1.S1_at        | X70787.1   | TC21849 | 2529 | 4573 | 6493 | 1.81 | 2.57 | pathogenesis-related protein PR P23                                                                                                                                 |
| LesAffx.38740.1.S1_at | BM412691   | TC23535 | 518  | 582  | 1326 | 1.12 | 2.56 | Transcribed locus, weakly similar to XP_001104086.1 similar to UDP-galactose-4-epimerase isoform 2 [Macaca mulatta]                                                 |
| Les.1510.1.S1_at      | AW030786   | TC23573 | 918  | 1743 | 2341 | 1.9  | 2.55 | Transcribed locus, weakly similar to XP_001106861.1 similar to sphingosine-1-phosphate lyase 1 [Macaca mulatta]                                                     |
| Les.104.1.S1_at       | AJ243455.1 | TC23544 | 28   | 34   | 72   | 1.18 | 2.55 | cyclin B2                                                                                                                                                           |
| Les.5654.1.S1_at      | BT014325.1 | TC22622 | 1449 | 2827 | 3682 | 1.95 | 2.54 | Lycopersicon esculentum clone 133598F, mRNA sequence                                                                                                                |
| Les.2759.2.A1_at      | BG629504   | TC22503 | 1339 | 2118 | 3377 | 1.58 | 2.52 | Transcribed locus, strongly similar to NP_001042468.1 [Oryza sativa (japonica cultivar-group)]                                                                      |
| Les.5065.1.S1_at      | BT013212.1 | TC22270 | 1314 | 1495 | 3299 | 1.14 | 2.51 | Lycopersicon esculentum clone 134422F, mRNA sequence                                                                                                                |
| Les.293.1.S1_at       | AY007560.1 | TC21902 | 519  | 610  | 1300 | 1.18 | 2.5  | hypothetical LOC543815                                                                                                                                              |
| LesAffx.22100.1.S1_at | AW216933   | TC22078 | 119  | 219  | 298  | 1.84 | 2.5  | Transcribed locus, weakly similar to XP_001061027.1 similar to Heat shock factor protein 1 (HSF 1) (Heat shock transcription factor 1) (HSTF 1) [Rattus norvegicus] |
| LesAffx.62138.1.S1_at | AW737374   | TC24364 | 110  | 195  | 273  | 1.77 | 2.48 | ---                                                                                                                                                                 |
| LesAffx.23309.1.S1_at | AI777449   | AI77744 | 330  | 393  | 816  | 1.19 | 2.48 | ---                                                                                                                                                                 |
| Les.2859.1.S1_at      | BG134254   | TC21767 | 347  | 580  | 857  | 1.67 | 2.47 | Transcribed locus, weakly similar to NP_001042083.1 [Oryza sativa (japonica cultivar-group)]                                                                        |
| LesAffx.37916.1.S1_at | BM536108   | TC23806 | 92   | 156  | 227  | 1.7  | 2.46 | Transcribed locus, weakly similar to NP_001048479.1 [Oryza sativa (japonica cultivar-group)]                                                                        |
| Les.5044.1.S1_at      | BT013168.1 | TC22109 | 1078 | 1736 | 2645 | 1.61 | 2.45 | Lycopersicon esculentum clone 134231R, mRNA sequence                                                                                                                |
| LesAffx.51285.1.S1_at | CN385118   | TC24451 | 85   | 106  | 207  | 1.25 | 2.45 | ---                                                                                                                                                                 |
| Les.4912.1.S1_at      | BT012886.1 | TC22592 | 773  | 1183 | 1887 | 1.53 | 2.44 | Lycopersicon esculentum clone 113990R, mRNA sequence                                                                                                                |
|                       |            |         | 1    | 2    | 2    | 1.67 | 2.44 | ---                                                                                                                                                                 |
| Les.2708.2.S1_at      | AW218185   | TC21907 | 1814 | 3174 | 4423 | 1.75 | 2.44 | Transcribed locus, moderately similar to NP_001044464.1 [Oryza sativa (japonica cultivar-group)]                                                                    |

|                       |            |          |      |      |      |      |      |                                                                                                                                         |
|-----------------------|------------|----------|------|------|------|------|------|-----------------------------------------------------------------------------------------------------------------------------------------|
| LesAffx.52594.1.S1_at | AI895802   | TC22372  | 28   | 36   | 68   | 1.27 | 2.42 | Transcribed locus, weakly similar to NP_001047179.1 [Oryza sativa (japonica cultivar-group)]                                            |
| Les.23.1.S1_at        | AF011555.1 | TC22224  | 1767 | 3428 | 4264 | 1.94 | 2.41 | jasmonic acid 2                                                                                                                         |
| Les.5591.1.S1_at      | BT014216.1 | TC23430  | 1555 | 2185 | 3697 | 1.4  | 2.38 | Lycopersicon esculentum clone 133394F, mRNA sequence                                                                                    |
| Les.4803.1.S1_at      | BT013418.1 | TC21851  | 125  | 235  | 296  | 1.88 | 2.37 | Lycopersicon esculentum clone 132056R, mRNA sequence                                                                                    |
| LesAffx.3244.1.S1_at  | BI934720   | TC22222  | 844  | 1116 | 1998 | 1.32 | 2.37 | Transcribed locus, weakly similar to NP_001045327.1 [Oryza sativa (japonica cultivar-group)]                                            |
| Les.1369.1.A1_at      | BG631144   | BG63114  | 32   | 47   | 77   | 1.46 | 2.37 | Transcribed locus                                                                                                                       |
| Les.1568.1.A1_at      | BG626849   | TC24275  | 45   | 74   | 107  | 1.64 | 2.36 | Transcribed locus                                                                                                                       |
| Les.5499.1.S1_at      | BT014028.1 | TC21914  | 1842 | 3303 | 4346 | 1.79 | 2.36 | Lycopersicon esculentum clone 133090F, mRNA sequence                                                                                    |
| Les.1610.1.S1_at      | BG735104   | TC23584  | 1892 | 3085 | 4457 | 1.63 | 2.36 | Proline dehydrogenase                                                                                                                   |
| Les.4523.1.S1_at      | AY497475.1 | TC21776  | 893  | 1700 | 2101 | 1.9  | 2.35 | xyloglucan endotransglucosylase-hydrolase XTH5                                                                                          |
| Les.582.1.A1_at       | BG628493   | TC24387  | 163  | 225  | 381  | 1.38 | 2.34 | Transcribed locus                                                                                                                       |
| Les.471.1.S1_at       | AJ270956.1 | TC22981  | 785  | 1042 | 1837 | 1.33 | 2.34 | Lycopersicon esculentum partial mRNA for subtilisin-like protein, clone mo5-3C11/1                                                      |
| Les.5264.1.S1_at      | BT013603.1 | TC23455  | 1455 | 1432 | 3387 | 0.98 | 2.33 | Lycopersicon esculentum clone 132370R, mRNA sequence                                                                                    |
| LesAffx.51285.1.A1_at | CN385118   | TC24451  | 37   | 51   | 86   | 1.38 | 2.33 | ---                                                                                                                                     |
| Les.1650.1.A1_at      | BG627719   | TC24168  | 1393 | 1918 | 3228 | 1.38 | 2.32 | Transcribed locus, weakly similar to XP_001110187.1 similar to peroxisomal short-chain alcohol dehydrogenase isoform 7 [Macaca mulatta] |
| Les.1287.2.S1_at      | AW621773   | TC22852  | 810  | 713  | 1860 | 0.88 | 2.3  | CDNA, clone: FC07DG10, HTC in fruit                                                                                                     |
| LesAffx.64505.1.S1_at | AI894738   | TC22840  | 863  | 1286 | 1980 | 1.49 | 2.29 | Transcribed locus, weakly similar to NP_001041763.1 [Oryza sativa (japonica cultivar-group)]                                            |
| LesAffx.51483.1.A1_at | CK348350   | CK34835  | 10   | 16   | 23   | 1.56 | 2.28 | ---                                                                                                                                     |
| Les.2123.2.S1_at      | BM413006   | TC23290  | 1500 | 2056 | 3412 | 1.37 | 2.28 | Transcribed locus, weakly similar to XP_001109429.1 similar to hect domain and RLD 2 [Macaca mulatta]                                   |
| Les.3710.1.S1_at      | AJ312131.1 | TC21745  | 154  | 290  | 350  | 1.88 | 2.27 | alternaria stem canker resistance protein                                                                                               |
| LesAffx.36979.1.S1_at | AI775450   | TC22380  | 820  | 1240 | 1861 | 1.51 | 2.27 | Transcribed locus, weakly similar to XP_001104766.1 calmodulin-like 5 [Macaca mulatta]                                                  |
| Les.5597.1.S1_at      | BT014226.1 | AW09450  | 40   | 49   | 92   | 1.21 | 2.27 | Lycopersicon esculentum clone 133421F, mRNA sequence                                                                                    |
| LesAffx.67017.1.S1_at | AW032581   | TC22724  | 37   | 56   | 84   | 1.52 | 2.27 | Transcribed locus, moderately similar to NP_001046101.1 [Oryza sativa (japonica cultivar-group)]                                        |
| Les.5778.1.S1_at      | BT014550.1 | NP924383 | 1792 | 3458 | 4050 | 1.93 | 2.26 | (Sodium/potassium)/proton exchanger 3                                                                                                   |
| LesAffx.69647.1.S1_at | AW223794   | TC24165  | 557  | 568  | 1257 | 1.02 | 2.26 | Transcribed locus, weakly similar to NP_001043992.1 [Oryza sativa (japonica cultivar-group)]                                            |
| LesAffx.38103.1.S1_at | BM410411   | TC24474  | 409  | 525  | 918  | 1.29 | 2.25 | ---                                                                                                                                     |
| LesAffx.45130.1.S1_at | BI933466   | BI93346  | 26   | 38   | 59   | 1.45 | 2.24 | ---                                                                                                                                     |
| Les.3665.1.S1_at      | U23053.1   | TC21734  | 6    | 5    | 13   | 0.86 | 2.24 | polygalacturonase precursor                                                                                                             |

|                       |            |         |      |      |       |      |      |                                                                                                                               |
|-----------------------|------------|---------|------|------|-------|------|------|-------------------------------------------------------------------------------------------------------------------------------|
| LesAffx.69872.1.S1_at | CN385882   | TC23745 | 127  | 139  | 282   | 1.1  | 2.23 | Transcribed locus                                                                                                             |
| Les.4217.1.S1_at      | Z48736.1   | BI20478 | 4673 | 2933 | 10392 | 0.63 | 2.22 | Cyp-3 gene for pre-pro-cysteine proteinase                                                                                    |
| LesAffx.60831.1.S1_at | AW928514   | TC22802 | 56   | 53   | 124   | 0.95 | 2.22 | Transcribed locus, weakly similar to NP_001042342.1 [Oryza sativa (japonica cultivar-group)]                                  |
| Les.5410.1.S1_at      | BT013860.1 | TC22889 | 1955 | 2502 | 4321  | 1.28 | 2.21 | Lycopersicon esculentum clone 132840F, mRNA sequence                                                                          |
| Les.3611.1.S1_at      | BI933029   | TC21908 | 1316 | 1956 | 2907  | 1.49 | 2.21 | biotin-containing subunit of methylcrotonyl-CoA carboxylase                                                                   |
| Les.1243.1.A1_at      | BG630316   | TC23603 | 416  | 739  | 917   | 1.78 | 2.2  | Transcribed locus                                                                                                             |
| Les.150.1.S1_at       | BT013117.1 | AW65015 | 477  | 619  | 1049  | 1.3  | 2.2  | Lycopersicon esculentum clone 114407R, mRNA sequence                                                                          |
| LesAffx.8337.1.S1_at  | AW094574   | TC22963 | 85   | 134  | 187   | 1.57 | 2.2  | Transcribed locus, weakly similar to NP_001051197.1 [Oryza sativa (japonica cultivar-group)]                                  |
| Les.3071.3.S1_at      | BI921398   | TC23091 | 564  | 771  | 1237  | 1.37 | 2.19 | Transcribed locus, weakly similar to XP_231524.4 similar to amino adipate-semialdehyde synthase precursor [Rattus norvegicus] |
| LesAffx.11542.1.S1_at | BI922302   | TC21973 | 75   | 100  | 164   | 1.34 | 2.18 | Transcribed locus, weakly similar to NP_001044352.1 [Oryza sativa (japonica cultivar-group)]                                  |
| Les.2569.1.S1_at      | BI421923   | TC22983 | 2681 | 5124 | 5844  | 1.91 | 2.18 | Transcribed locus, weakly similar to NP_001041763.1 [Oryza sativa (japonica cultivar-group)]                                  |
| LesAffx.1695.1.S1_at  | BE435747   | TC21794 | 92   | 97   | 200   | 1.06 | 2.18 | Transcribed locus, weakly similar to NP_001042242.1 [Oryza sativa (japonica cultivar-group)]                                  |
| Les.73.1.S1_at        | AF022873.1 | TC21721 | 2362 | 3311 | 5107  | 1.4  | 2.16 | hypothetical LOC544136                                                                                                        |
| Les.3935.1.S1_at      | BT013403.1 | TC21790 | 4181 | 7241 | 9035  | 1.73 | 2.16 | Lycopersicon esculentum clone 135717R, mRNA sequence                                                                          |
| Les.1961.1.A1_at      | BG630514   | BG63051 | 6    | 9    | 13    | 1.57 | 2.16 | Transcribed locus                                                                                                             |
| Les.4959.1.S1_at      | BT012990.1 | TC24411 | 271  | 339  | 584   | 1.25 | 2.16 | Lycopersicon esculentum clone 114210R, mRNA sequence                                                                          |
| Les.59.1.S1_at        | AF014809.1 | TC22468 | 3311 | 6201 | 7145  | 1.87 | 2.16 | proline transporter 2                                                                                                         |
| LesAffx.62570.2.S1_at | CD003040   | TC24016 | 137  | 216  | 295   | 1.57 | 2.15 | Transcribed locus, weakly similar to NP_001044685.1 [Oryza sativa (japonica cultivar-group)]                                  |
| LesAffx.65515.1.S1_at | BM411507   | TC23812 | 78   | 112  | 166   | 1.44 | 2.14 | Transcribed locus, weakly similar to NP_001046014.1 [Oryza sativa (japonica cultivar-group)]                                  |
| LesAffx.26054.1.S1_at | BG135770   | TC21811 | 94   | 178  | 201   | 1.88 | 2.13 | CDNA, clone: FC09AA01, HTC in fruit                                                                                           |
| LesAffx.70064.1.S1_at | BE435236   | DB72318 | 419  | 514  | 892   | 1.23 | 2.13 | Transcribed locus, weakly similar to NP_001041976.1 [Oryza sativa (japonica cultivar-group)]                                  |
| Les.4356.3.S1_at      | BE432137   | TC23318 | 855  | 1374 | 1818  | 1.61 | 2.13 | Cytosolic ascorbate peroxidase 2                                                                                              |
| LesAffx.70885.1.S1_at | BI422537   | TC22623 | 529  | 800  | 1123  | 1.51 | 2.12 | Transcribed locus, weakly similar to NP_001042660.1 [Oryza sativa (japonica cultivar-group)]                                  |
|                       |            |         | 6    | 8    | 14    | 1.22 | 2.12 | ---                                                                                                                           |
| LesAffx.64505.2.S1_at | AW032569   | TC21897 | 2531 | 3819 | 5368  | 1.51 | 2.12 | Transcribed locus, weakly similar to NP_001041763.1 [Oryza sativa (japonica cultivar-group)]                                  |

|                       |            |         |      |      |      |      |      |                                                                                                                                                            |
|-----------------------|------------|---------|------|------|------|------|------|------------------------------------------------------------------------------------------------------------------------------------------------------------|
| Les.471.1.A1_at       | AJ270956.1 | TC22981 | 279  | 364  | 591  | 1.31 | 2.12 | Lycopersicon esculentum partial mRNA for subtilisin-like protein, clone mo5-3C11/1                                                                         |
| Les.3403.2.S1_at      | BI925376   | TC22472 | 1151 | 1895 | 2434 | 1.65 | 2.11 | Transcribed locus, weakly similar to NP_001046332.1 [Oryza sativa (japonica cultivar-group)]                                                               |
| LesAffx.18872.1.S1_at | BI204261   | BI20426 | 355  | 528  | 748  | 1.49 | 2.11 | ---                                                                                                                                                        |
| Les.3042.1.S1_at      | BI926173   | TC23899 | 31   | 39   | 64   | 1.26 | 2.1  | Transcribed locus, weakly similar to NP_001062055.1 [Oryza sativa (japonica cultivar-group)]                                                               |
| Les.4038.1.S1_at      | AY081908.1 | TC21781 | 192  | 351  | 402  | 1.83 | 2.09 | Lycopersicon esculentum N-hydroxycinnamoyl-CoA:tyramine N-hydroxycinnamoyl transferase THT1-4 (THT1-4) pseudogene                                          |
| LesAffx.68054.1.S1_at | AI898501   | TC22471 | 262  | 264  | 548  | 1.01 | 2.09 | Transcribed locus, weakly similar to NP_001049859.1 [Oryza sativa (japonica cultivar-group)]                                                               |
| LesAffx.64980.1.S1_at | CN384849   | TC22156 | 49   | 69   | 103  | 1.41 | 2.09 | CDNA, clone: FC09BG05, HTC in fruit                                                                                                                        |
| LesAffx.70873.1.S1_at | BG124340   | TC23574 | 315  | 488  | 658  | 1.55 | 2.09 | Transcribed locus, weakly similar to NP_201445.1 protein [Arabidopsis thaliana]                                                                            |
| LesAffx.50480.1.S1_at | AI780229   | TC21985 | 447  | 698  | 927  | 1.56 | 2.08 | Transcribed locus, weakly similar to NP_001044365.1 [Oryza sativa (japonica cultivar-group)]                                                               |
| LesAffx.35587.1.S1_at | AW442015   | TC23327 | 3113 | 3695 | 6454 | 1.19 | 2.07 | Transcribed locus, weakly similar to XP_001092047.1 legumain [Macaca mulatta]                                                                              |
| LesAffx.3253.2.S1_at  | AW034203   | TC22113 | 65   | 83   | 134  | 1.29 | 2.07 | Transcribed locus, weakly similar to XP_001091435.1 similar to cytochrome P450, family 26, subfamily A, polypeptide 1 isoform 1 isoform 3 [Macaca mulatta] |
| LesAffx.54411.1.S1_at | CD003054   | DB70399 | 123  | 147  | 254  | 1.2  | 2.06 | Transcribed locus, weakly similar to NP_001047524.1 [Oryza sativa (japonica cultivar-group)]                                                               |
| Les.4356.2.S1_at      | BM410801   | TC23318 | 1416 | 2225 | 2920 | 1.57 | 2.06 | Cytosolic ascorbate peroxidase 2                                                                                                                           |
| LesAffx.68107.1.S1_at | AI485479   | TC23454 | 126  | 173  | 260  | 1.37 | 2.06 | Transcribed locus, moderately similar to NP_001048067.1 [Oryza sativa (japonica cultivar-group)]                                                           |
| Les.4934.1.S1_at      | BT012932.1 | TC22421 | 169  | 298  | 348  | 1.76 | 2.06 | Lycopersicon esculentum clone 114095R, mRNA sequence                                                                                                       |
| LesAffx.71532.1.S1_at | AI772343   | TC22607 | 1340 | 2621 | 2750 | 1.96 | 2.05 | Transcribed locus, weakly similar to NP_001041930.1 [Oryza sativa (japonica cultivar-group)]                                                               |
| Les.5104.1.S1_at      | BT013286.1 | TC21728 | 1380 | 1949 | 2830 | 1.41 | 2.05 | arginase 1                                                                                                                                                 |
| Les.450.1.S1_at       | AJ441250.2 | TC23501 | 390  | 755  | 799  | 1.94 | 2.05 | p27KIP1-related-protein 2                                                                                                                                  |
| Les.4355.1.S1_at      | BG128350   | TC23169 | 345  | 536  | 706  | 1.55 | 2.05 | Ferredoxin-I                                                                                                                                               |
| Les.5917.1.S1_at      | AJ715790.1 | TC21740 | 1850 | 2836 | 3780 | 1.53 | 2.04 | 1-aminocyclopropane-1-carboxylate oxidase                                                                                                                  |
| Les.7.1.S1_at         | BI921853   | TC21823 | 2474 | 3217 | 5043 | 1.3  | 2.04 | homogentisate 1,2-dioxygenase                                                                                                                              |
| LesAffx.50270.1.S1_at | BI422773   | TC22961 | 896  | 1139 | 1823 | 1.27 | 2.03 | Transcribed locus, weakly similar to XP_001098383.1 chromosome 20 open reading frame 3 isoform 1 [Macaca mulatta]                                          |
| Les.3388.2.S1_at      | BM535881   | TC23309 | 87   | 118  | 177  | 1.35 | 2.02 | Transcribed locus, weakly similar to NP_001042227.1 [Oryza sativa (japonica cultivar-group)]                                                               |
| LesAffx.49103.1.A1_at | AW224716   | TC22913 | 1060 | 1614 | 2142 | 1.52 | 2.02 | Transcribed locus, weakly similar to NP_065615.1 acid (GABA(A)) receptor-associated protein-like 1 [Mus musculus]                                          |

|                       |            |         |      |       |       |      |      |                                                                                                                          |
|-----------------------|------------|---------|------|-------|-------|------|------|--------------------------------------------------------------------------------------------------------------------------|
| Les.1061.1.A1_at      | AI488184   | TC23906 | 69   | 91    | 139   | 1.32 | 2.02 | Transcribed locus, weakly similar to NP_568700.1 protein [Arabidopsis thaliana]                                          |
| Les.411.1.S1_at       | BI204543   | TC23306 | 6150 | 11713 | 12396 | 1.9  | 2.02 | Transcribed locus, weakly similar to NP_001046222.1 [Oryza sativa (japonica cultivar-group)]                             |
| Les.3499.1.S1_at      | AF387785.1 | TC21887 | 483  | 515   | 971   | 1.07 | 2.01 | leucine-zipper transcription factor                                                                                      |
| LesAffx.63935.1.S1_at | AW442721   | TC23203 | 117  | 168   | 234   | 1.45 | 2.01 | Transcribed locus, weakly similar to XP_001098000.1 matrix metalloproteinase 8 [Macaca mulatta]                          |
| Les.170.1.S1_at       | AY026344.1 | TC22471 | 267  | 299   | 536   | 1.12 | 2.01 | non-symbiotic hemoglobin class 2                                                                                         |
| LesAffx.50270.2.S1_at | BI205699   | TC22751 | 710  | 891   | 1425  | 1.26 | 2.01 | Transcribed locus, weakly similar to XP_001098383.1 chromosome 20 open reading frame 3 isoform 1 [Macaca mulatta]        |
| LesAffx.34425.1.S1_at | BE354536   | TC23085 | 253  | 400   | 506   | 1.58 | 2    | Transcribed locus, weakly similar to NP_001044062.1 [Oryza sativa (japonica cultivar-group)]                             |
| Les.4526.1.S1_at      | AY534757.1 | TC21751 | 2391 | 2938  | 4790  | 1.23 | 2    | protein phosphatase 2C                                                                                                   |
| Les.2544.1.A1_at      | BG629373   | TC23776 | 835  | 1595  | 1669  | 1.91 | 2    | Transcribed locus, weakly similar to NP_001042177.1 [Oryza sativa (japonica cultivar-group)]                             |
| Les.5621.1.S1_at      | BT014267.1 |         | 243  | 302   | 486   | 1.24 | 2    | Lycopersicon esculentum clone 133492F, mRNA sequence                                                                     |
| Les.4300.1.A1_at      | BG628954   | TC21888 | 5624 | 4431  | 2831  | 0.79 | 0.5  | Transcribed locus, weakly similar to NP_001043243.1 [Oryza sativa (japonica cultivar-group)]                             |
| Les.5510.1.S1_at      | BT014047.1 | TC22069 | 289  | 245   | 146   | 0.85 | 0.5  | Lycopersicon esculentum clone 133144F, mRNA sequence                                                                     |
| LesAffx.60168.2.S1_at | BI204956   | TC22806 | 184  | 110   | 93    | 0.6  | 0.5  | Transcribed locus, weakly similar to XP_001104442.1 similar to chromatin modifying protein 2B isoform 3 [Macaca mulatta] |
| LesAffx.59336.1.S1_at | BI203548   | TC21953 | 179  | 129   | 90    | 0.72 | 0.5  | Transcribed locus, weakly similar to NP_001044161.1 [Oryza sativa (japonica cultivar-group)]                             |
| Les.5493.1.S1_at      | BT014016.1 | AW62178 | 299  | 194   | 150   | 0.65 | 0.5  | Lycopersicon esculentum clone 133078F, mRNA sequence                                                                     |
| Les.4083.1.S1_at      | BG735070   | TC22596 | 8653 | 6378  | 4334  | 0.74 | 0.5  | Lycopersicon esculentum clone 132756F, mRNA sequence                                                                     |
| Les.2409.1.S1_at      | BG735325   | TC23979 | 1988 | 1218  | 994   | 0.61 | 0.5  | Lycopersicon esculentum clone 133918F, mRNA sequence                                                                     |
| LesAffx.65060.1.A1_at | CK716180   | DV10448 | 1036 | 719   | 517   | 0.69 | 0.5  | ---                                                                                                                      |
| Les.3618.1.S1_at      | U20592.1   | TC21795 | 8791 | 7195  | 4382  | 0.82 | 0.5  | hypothetical LOC544001                                                                                                   |
| LesAffx.62950.1.S1_at | AI490601   | TC23296 | 339  | 321   | 169   | 0.95 | 0.5  | Transcribed locus, weakly similar to XP_001104086.1 similar to UDP-galactose-4-epimerase isoform 2 [Macaca mulatta]      |
| Les.3748.1.S1_at      | AB023388.1 | TC22967 | 2170 | 1260  | 1080  | 0.58 | 0.5  | acid phosphatase                                                                                                         |
| LesAffx.10095.1.A1_at | AA824679   | TC23852 | 2562 | 2026  | 1275  | 0.79 | 0.5  | ---                                                                                                                      |
| Les.2265.1.S1_at      | BG735394   | TC24162 | 440  | 343   | 218   | 0.78 | 0.5  | Lycopersicon esculentum clone 133691F, mRNA sequence                                                                     |
| LesAffx.44490.1.S1_at | AJ785174   | TC22044 | 1664 | 964   | 826   | 0.58 | 0.5  | Transcribed locus, weakly similar to NP_177118.1 factor [Arabidopsis thaliana]                                           |
| Les.110.1.S1_at       | AF154423.1 | TC22330 | 989  | 631   | 490   | 0.64 | 0.5  | TBG5 protein                                                                                                             |
| Les.1394.1.A1_at      | BG631315   | AI77731 | 2486 | 1733  | 1232  | 0.7  | 0.5  | Transcribed locus, strongly similar to NP_054477.1 II protein D1 [Nicotiana tabacum]                                     |



|                       |            |         |      |      |      |      |      |                                                                                                                                          |
|-----------------------|------------|---------|------|------|------|------|------|------------------------------------------------------------------------------------------------------------------------------------------|
| LesAffx.70144.1.S1_at | BI422600   | TC22131 | 1251 | 979  | 619  | 0.78 | 0.5  | Transcribed locus, moderately similar to NP_001067589.1 [Oryza sativa (japonica cultivar-group)]                                         |
| LesAffx.66226.2.S1_at | BI205336   | TC22735 | 412  | 217  | 204  | 0.53 | 0.49 | Transcribed locus, weakly similar to NP_001041821.1 [Oryza sativa (japonica cultivar-group)]                                             |
| Les.5560.1.S1_at      | BT014148.1 | TC22942 | 1599 | 1116 | 791  | 0.7  | 0.49 | Lycopersicon esculentum clone 133267F, mRNA sequence                                                                                     |
| LesAffx.55337.1.S1_at | BM410261   | TC22580 | 1196 | 1140 | 591  | 0.95 | 0.49 | Transcribed locus, weakly similar to NP_001043235.1 [Oryza sativa (japonica cultivar-group)]                                             |
| Les.3168.1.S1_at      | BT013505.1 | TC23152 | 913  | 726  | 451  | 0.8  | 0.49 | INS-1P protein                                                                                                                           |
| Les.3732.1.A1_at      | AF308936.1 | NP28032 | 20   | 12   | 10   | 0.62 | 0.49 | endo-beta-1,4-D-glucanase                                                                                                                |
| Les.224.1.A1_at       | AJ277561.1 | TC21885 | 952  | 567  | 469  | 0.6  | 0.49 | gts1 protein                                                                                                                             |
| Les.3290.1.S1_at      | BG123573   | TC22022 | 1029 | 668  | 506  | 0.65 | 0.49 | Transcribed locus, weakly similar to XP_001093616.1 glutamic-pyruvate transaminase (alanine aminotransferase) isoform 1 [Macaca mulatta] |
| Les.3290.3.S1_at      | BI933219   | BG12945 | 1168 | 770  | 574  | 0.66 | 0.49 | Transcribed locus, weakly similar to XP_001093616.1 glutamic-pyruvate transaminase (alanine aminotransferase) isoform 1 [Macaca mulatta] |
| Les.5933.1.S1_at      | BG123740   | TC23593 | 849  | 470  | 417  | 0.55 | 0.49 | CDNA, clone: FC08AD03, HTC in fruit                                                                                                      |
| LesAffx.71003.1.S1_at | AI779846   | TC22050 | 614  | 607  | 301  | 0.99 | 0.49 | Transcribed locus, weakly similar to NP_001054553.1 [Oryza sativa (japonica cultivar-group)]                                             |
| Les.3640.1.S1_at      | X95098.1   | TC21838 | 39   | 21   | 19   | 0.54 | 0.49 | ammonium transporter                                                                                                                     |
| Les.1997.1.S1_at      | BE354113   | TC22008 | 1163 | 631  | 569  | 0.54 | 0.49 | Transcribed locus, weakly similar to NP_001737.1 precursor [Homo sapiens]                                                                |
| Les.3621.1.S1_at      | K03290.1   | BG63088 | 1946 | 1675 | 950  | 0.86 | 0.49 | wound-induced proteinase inhibitor I prepropeptide                                                                                       |
| Les.4003.1.S1_at      | BG631258   | TC22516 | 2476 | 1737 | 1209 | 0.7  | 0.49 | Lycopersicon esculentum clone 113690F, mRNA sequence                                                                                     |
| LesAffx.34986.1.S1_at | CK715664   | TC23304 | 348  | 286  | 169  | 0.82 | 0.49 | Transcribed locus, weakly similar to NP_001048569.1 [Oryza sativa (japonica cultivar-group)]                                             |
| Les.3718.1.S1_at      | AF384374.1 | TC21922 | 1450 | 1469 | 705  | 1.01 | 0.49 | allene oxide cyclase                                                                                                                     |
| Les.2944.1.A1_s_at    | BG628979   | TC21934 | 1185 | 907  | 574  | 0.77 | 0.48 | Lycopersicon esculentum (DB208) meloidogyne-induced giant cell protein mRNA, 3' end                                                      |
| Les.2964.3.A1_at      | BG626300   | TC23599 | 630  | 573  | 305  | 0.91 | 0.48 | Transcribed locus, weakly similar to NP_001042324.1 [Oryza sativa (japonica cultivar-group)]                                             |
| LesAffx.64583.1.S1_at | BM409701   | TC22829 | 539  | 493  | 260  | 0.91 | 0.48 | Transcribed locus, weakly similar to XP_573107.2 hypothetical protein [Rattus norvegicus]                                                |
| Les.3047.1.S1_at      | BT013001.1 | TC21910 | 210  | 119  | 101  | 0.57 | 0.48 | Expansin18                                                                                                                               |
| Les.3477.1.S1_at      | AF230198.2 | TC23205 | 71   | 42   | 34   | 0.59 | 0.48 | hypothetical LOC543641                                                                                                                   |
| LesAffx.69296.1.S1_at | AW092917   | TC22654 | 2842 | 2221 | 1369 | 0.78 | 0.48 | Transcribed locus, weakly similar to NP_001045764.1 [Oryza sativa (japonica cultivar-group)]                                             |
| Les.3127.1.S1_at      | AW092318   | TC22823 | 3397 | 3033 | 1631 | 0.89 | 0.48 | Transcribed locus, weakly similar to XP_001096387.1 similar to serine hydroxymethyltransferase 1 (soluble) isoform 1 [Macaca mulatta]    |

|                       |            |         |       |      |      |      |      |                                                                                                                 |
|-----------------------|------------|---------|-------|------|------|------|------|-----------------------------------------------------------------------------------------------------------------|
| LesAffx.41703.1.A1_at | BG352060   | TC23987 | 919   | 899  | 440  | 0.98 | 0.48 | Transcribed locus, moderately similar to NP_001062462.1 [Oryza sativa (japonica cultivar-group)]                |
| LesAffx.44490.1.A1_at | AJ785174   | TC22044 | 1203  | 686  | 575  | 0.57 | 0.48 | Transcribed locus, weakly similar to NP_177118.1 factor [Arabidopsis thaliana]                                  |
| Les.4097.1.S1_at      | AF022018.1 | TC22516 | 2150  | 1268 | 1026 | 0.59 | 0.48 | IAA7 protein                                                                                                    |
| Les.4097.1.A1_at      | AF022018.1 | TC22516 | 679   | 403  | 323  | 0.59 | 0.48 | IAA7 protein                                                                                                    |
| LesAffx.3918.1.S1_at  | BM410706   | TC21958 | 1737  | 2154 | 827  | 1.24 | 0.48 | Transcribed locus, weakly similar to NP_001047111.1 [Oryza sativa (japonica cultivar-group)]                    |
| Les.4849.1.S1_at      | BT012755.1 | TC21877 | 1196  | 1028 | 569  | 0.86 | 0.48 | Lycopersicon esculentum clone 113699R, mRNA sequence                                                            |
| Les.840.1.A1_at       | BG629718   | TC24411 | 314   | 350  | 149  | 1.12 | 0.47 | Transcribed locus                                                                                               |
| Les.3681.1.S1_at      | AF466378.1 | TC23533 | 884   | 517  | 418  | 0.58 | 0.47 | hypothetical LOC543709                                                                                          |
| LesAffx.8708.1.S1_at  | AW033860   | AW03386 | 82    | 68   | 39   | 0.83 | 0.47 | ---                                                                                                             |
| Les.3579.1.S1_at      | Z68309.1   | TC23498 | 264   | 165  | 124  | 0.63 | 0.47 | Metallothionein-like protein                                                                                    |
| Les.1997.3.A1_at      | BG630825   | TC24117 | 985   | 516  | 464  | 0.52 | 0.47 | Transcribed locus, weakly similar to NP_001737.1 precursor [Homo sapiens]                                       |
| LesAffx.1084.1.S1_at  | BG133220   | TC23413 | 296   | 175  | 140  | 0.59 | 0.47 | Transcribed locus, weakly similar to XP_001085031.1 similar to Werner syndrome protein [Macaca mulatta]         |
| Les.1248.2.A1_at      | BT012749.1 | TC21728 | 613   | 344  | 288  | 0.56 | 0.47 | GDP-mannose pyrophosphorylase                                                                                   |
| Les.3234.1.A1_at      | BG735047   | TC23423 | 2784  | 2650 | 1309 | 0.95 | 0.47 | Metalloprotease inhibitor                                                                                       |
| LesAffx.71535.1.S1_at | AW040299   | TC23102 | 120   | 134  | 56   | 1.11 | 0.47 | Transcribed locus, weakly similar to NP_001049750.1 [Oryza sativa (japonica cultivar-group)]                    |
| Les.4300.2.S1_at      | AW217635   | TC21888 | 12153 | 8997 | 5696 | 0.74 | 0.47 | Transcribed locus, weakly similar to NP_001043243.1 [Oryza sativa (japonica cultivar-group)]                    |
| Les.490.1.A1_at       | BG625891   | TC22945 | 302   | 247  | 142  | 0.82 | 0.47 | Transcribed locus, weakly similar to XP_001108145.1 similar to nucleotide binding protein-like [Macaca mulatta] |
| Les.4301.1.S1_at      | BG128693   | TC21928 | 3293  | 1880 | 1543 | 0.57 | 0.47 | pre-plastocyanin (AA -64 to 106)                                                                                |
| LesAffx.42825.1.S1_at | BI924900   | TC23069 | 511   | 262  | 239  | 0.51 | 0.47 | Transcribed locus, weakly similar to NP_001046792.1 [Oryza sativa (japonica cultivar-group)]                    |
| Les.1310.1.S1_at      | BT013430.1 | TC22042 | 2094  | 1352 | 976  | 0.65 | 0.47 | Lycopersicon esculentum clone 132070F, mRNA sequence                                                            |
| LesAffx.7472.2.S1_at  | AW651303   | TC23954 | 132   | 77   | 61   | 0.58 | 0.47 | Transcribed locus, weakly similar to NP_001043730.1 [Oryza sativa (japonica cultivar-group)]                    |
| Les.3266.2.S1_at      | BI931445   | TC23669 | 170   | 221  | 79   | 1.3  | 0.47 | Transcribed locus, moderately similar to NP_001047794.1 [Oryza sativa (japonica cultivar-group)]                |
| Les.2946.2.S1_at      | BG130169   | TC22071 | 3709  | 3559 | 1722 | 0.96 | 0.46 | CDNA, clone: FC16CC05, HTC in fruit                                                                             |
| Les.1936.1.S1_at      | BG626997   | TC21753 | 859   | 1077 | 399  | 1.25 | 0.46 | Lycopersicon esculentum clone 133556R, mRNA sequence                                                            |
| Les.2063.1.A1_at      | BG631371   | TC24473 | 44    | 35   | 21   | 0.79 | 0.46 | Transcribed locus                                                                                               |
| Les.2917.1.S1_at      | BM412347   | TC22799 | 425   | 252  | 196  | 0.59 | 0.46 | Transcribed locus                                                                                               |
| Les.1157.1.A1_at      | BG629717   | BG62971 | 110   | 102  | 51   | 0.93 | 0.46 | Transcribed locus                                                                                               |

|                       |            |         |      |      |      |      |      |                                                                                                                                       |
|-----------------------|------------|---------|------|------|------|------|------|---------------------------------------------------------------------------------------------------------------------------------------|
| Les.1481.1.A1_at      | BG625940   | BG62594 | 55   | 52   | 26   | 0.94 | 0.46 | Transcribed locus, weakly similar to NP_001052936.1 [Oryza sativa (japonica cultivar-group)]                                          |
| LesAffx.65060.1.S1_at | CK716180   | DV10448 | 502  | 326  | 231  | 0.65 | 0.46 | ---                                                                                                                                   |
| Les.2038.1.A1_at      | BG631023   | TC23348 | 570  | 532  | 262  | 0.93 | 0.46 | Transcribed locus, weakly similar to NP_199407.1 ester hydrolase/ hydrolase, acting on ester bonds [Arabidopsis thaliana]             |
| Les.3214.1.S1_at      | BG631018   | TC21991 | 1105 | 616  | 507  | 0.56 | 0.46 | Transcribed locus, strongly similar to NP_001064609.1 [Oryza sativa (japonica cultivar-group)]                                        |
| LesAffx.55629.1.S1_at | BM412122   | TC22287 | 484  | 425  | 222  | 0.88 | 0.46 | Transcribed locus, weakly similar to NP_001044052.1 [Oryza sativa (japonica cultivar-group)]                                          |
| Les.672.1.S1_at       | BM536270   | TC22195 | 330  | 202  | 151  | 0.61 | 0.46 | Transcribed locus, weakly similar to NP_001042227.1 [Oryza sativa (japonica cultivar-group)]                                          |
| Les.2944.3.S1_at      | BE462526   | TC21934 | 1451 | 980  | 663  | 0.67 | 0.46 | Pto kinase interactor 1                                                                                                               |
| Les.4492.2.S1_at      | CK714954   | TC22356 | 4075 | 2595 | 1862 | 0.64 | 0.46 | Transcribed locus, weakly similar to XP_001111095.1 aldolase B isoform 5 [Macaca mulatta]                                             |
| Les.2131.2.S1_at      | BE433043   | TC22249 | 2075 | 2069 | 947  | 1    | 0.46 | Transcribed locus, weakly similar to NP_001050262.1 [Oryza sativa (japonica cultivar-group)]                                          |
| Les.5523.1.S1_at      | BT014071.1 | TC21750 | 1899 | 1453 | 864  | 0.77 | 0.45 | Lycopersicon esculentum clone 133171F, mRNA sequence                                                                                  |
| Les.3127.1.S1_a_at    | AW092318   | TC22823 | 2789 | 2542 | 1268 | 0.91 | 0.45 | Transcribed locus, weakly similar to XP_001096387.1 similar to serine hydroxymethyltransferase 1 (soluble) isoform 1 [Macaca mulatta] |
| LesAffx.68547.1.S1_at | AW442497   | TC22270 | 1339 | 808  | 609  | 0.6  | 0.45 | Transcribed locus, weakly similar to NP_001043047.1 [Oryza sativa (japonica cultivar-group)]                                          |
| Les.3174.1.S1_at      | BT012701.1 | TC22568 | 718  | 725  | 326  | 1.01 | 0.45 | Lycopersicon esculentum clone 113575F, mRNA sequence                                                                                  |
| Les.3127.3.S1_at      | AW932976   | AW09372 | 2843 | 2554 | 1288 | 0.9  | 0.45 | Transcribed locus, weakly similar to XP_001096387.1 similar to serine hydroxymethyltransferase 1 (soluble) isoform 1 [Macaca mulatta] |
| LesAffx.286.9.S1_at   | CK716206   | BP89354 | 3018 | 1783 | 1366 | 0.59 | 0.45 | ---                                                                                                                                   |
| Les.2131.1.A1_at      | BG627099   | TC22249 | 2010 | 2120 | 905  | 1.05 | 0.45 | Transcribed locus, weakly similar to NP_001050262.1 [Oryza sativa (japonica cultivar-group)]                                          |
| LesAffx.17157.1.A1_at | CK715404   | CK71540 | 331  | 211  | 149  | 0.64 | 0.45 | ---                                                                                                                                   |
| LesAffx.45315.4.S1_at | AW622607   | TC23315 | 3339 | 2218 | 1502 | 0.66 | 0.45 | Transcribed locus, weakly similar to XP_001105252.1 similar to NAD(P)H:quinone oxidoreductase type 3, polypeptide A2 [Macaca mulatta] |
| Les.4975.1.S1_at      | BT013032.1 | TC23130 | 219  | 215  | 98   | 0.98 | 0.45 | Lycopersicon esculentum clone 114280F, mRNA sequence                                                                                  |
| Les.2809.1.S1_at      | BT014540.1 | TC24080 | 660  | 525  | 296  | 0.8  | 0.45 | Lycopersicon esculentum clone 133955F, mRNA sequence                                                                                  |
| LesAffx.66331.1.S1_at | BI421673   | TC21932 | 195  | 211  | 88   | 1.08 | 0.45 | Transcribed locus, weakly similar to NP_001056463.1 [Oryza sativa (japonica cultivar-group)]                                          |
| Les.5738.1.S1_at      | BT014475.1 | TC23739 | 647  | 339  | 290  | 0.52 | 0.45 | Lycopersicon esculentum clone 133825F, mRNA sequence                                                                                  |

|                       |            |         |       |      |      |      |      |                                                                                                                               |
|-----------------------|------------|---------|-------|------|------|------|------|-------------------------------------------------------------------------------------------------------------------------------|
| LesAffx.1276.1.S1_at  | BG130074   | TC23044 | 2035  | 1506 | 911  | 0.74 | 0.45 | Transcribed locus, weakly similar to NP_001043284.1 [Oryza sativa (japonica cultivar-group)]                                  |
| Les.2024.1.A1_at      | BG631036   | TC23275 | 1119  | 833  | 499  | 0.74 | 0.45 | Transcribed locus, weakly similar to XP_001105201.1 fructose-1,6-bisphosphatase 1 isoform 1 [Macaca mulatta]                  |
| Les.4980.1.S1_at      | BT013041.1 | TC21982 | 818   | 432  | 365  | 0.53 | 0.45 | Lycopersicon esculentum clone 114291R, mRNA sequence                                                                          |
| Les.740.1.A1_at       | BG627220   | TC24320 | 61    | 35   | 27   | 0.58 | 0.44 | Transcribed locus                                                                                                             |
| Les.3594.1.S1_at      | Z47980.1   | TC21807 | 2402  | 1294 | 1068 | 0.54 | 0.44 | hypothetical LOC544160                                                                                                        |
| Les.2478.1.S1_a_at    | AI780323   | TC21757 | 12076 | 7738 | 5359 | 0.64 | 0.44 | Pathogenesis-related protein P2                                                                                               |
| LesAffx.70088.1.S1_at | BI924873   | TC22069 | 961   | 714  | 423  | 0.74 | 0.44 | Transcribed locus, weakly similar to NP_565556.1 protein [Arabidopsis thaliana]                                               |
| Les.3740.1.S1_at      | X73986.1   | TC24046 | 879   | 566  | 386  | 0.64 | 0.44 | cathepsin D inhibitor protein                                                                                                 |
| Les.4520.1.S1_at      | BT013422.1 | GO37596 | 6935  | 3680 | 3042 | 0.53 | 0.44 | Lycopersicon esculentum clone 132061R, mRNA sequence                                                                          |
| Les.827.1.S1_at       | BG626882   | TC23903 | 2925  | 1784 | 1281 | 0.61 | 0.44 | TBG6 protein                                                                                                                  |
| Les.4099.1.S1_at      | AY187634.1 | TC21751 | 572   | 504  | 250  | 0.88 | 0.44 | phosphoenolpyruvate carboxylase kinase 2                                                                                      |
| Les.2971.2.A1_at      | BG629234   | TC23191 | 2748  | 2599 | 1199 | 0.95 | 0.44 | Wound-induced proteinase inhibitor I prepropeptide                                                                            |
| Les.1784.2.A1_at      | BG628995   | TC24140 | 295   | 180  | 129  | 0.61 | 0.44 | Transcribed locus, weakly similar to XP_001118335.1 similar to intestinal facilitative glucose transporter 7 [Macaca mulatta] |
| Les.4488.1.S1_at      | BG628643   | TC22827 | 2818  | 2991 | 1228 | 1.06 | 0.44 | threonine deaminase                                                                                                           |
| LesAffx.70112.1.S1_at | AW092445   | TC22090 | 443   | 298  | 193  | 0.67 | 0.44 | Transcribed locus, moderately similar to NP_001044346.1 [Oryza sativa (japonica cultivar-group)]                              |
| Les.4300.3.S1_at      | BI932691   | TC21888 | 11720 | 8379 | 5105 | 0.71 | 0.44 | Transcribed locus, weakly similar to NP_001043243.1 [Oryza sativa (japonica cultivar-group)]                                  |
| LesAffx.10095.1.S1_at | AA824679   | TC23852 | 933   | 651  | 406  | 0.7  | 0.44 | ---                                                                                                                           |
| LesAffx.66600.1.A1_at | AW036163   | TC23173 | 882   | 703  | 382  | 0.8  | 0.43 | Transcribed locus, moderately similar to NP_001045167.1 [Oryza sativa (japonica cultivar-group)]                              |
| LesAffx.30938.1.S1_at | AJ785088   | TC22113 | 644   | 366  | 279  | 0.57 | 0.43 | Transcribed locus, weakly similar to NP_001042177.1 [Oryza sativa (japonica cultivar-group)]                                  |
| LesAffx.1276.2.S1_at  | AI484083   | TC23044 | 3102  | 2313 | 1342 | 0.75 | 0.43 | Transcribed locus, weakly similar to NP_001043284.1 [Oryza sativa (japonica cultivar-group)]                                  |
| Les.2856.3.S1_at      | BG130913   | TC22367 | 638   | 528  | 276  | 0.83 | 0.43 | Transcribed locus, weakly similar to NP_001043401.1 [Oryza sativa (japonica cultivar-group)]                                  |
| Les.2095.1.A1_at      | BG627157   | TC23577 | 223   | 180  | 96   | 0.8  | 0.43 | Transcribed locus                                                                                                             |
| Les.2418.1.S1_at      | BG735381   | BG73538 | 228   | 244  | 98   | 1.07 | 0.43 | Transcribed locus                                                                                                             |
| LesAffx.58110.1.A1_at | AJ785349   | BE43527 | 235   | 122  | 101  | 0.52 | 0.43 | ---                                                                                                                           |
| LesAffx.5822.1.S1_at  | BG644005   | TC24068 | 260   | 157  | 112  | 0.6  | 0.43 | Transcribed locus, weakly similar to NP_001054370.1 [Oryza sativa (japonica cultivar-group)]                                  |
| Les.4493.1.S1_at      | BG734807   | TC22690 | 2875  | 2105 | 1238 | 0.73 | 0.43 | ADP/ATP translocator                                                                                                          |

|                       |            |         |      |      |      |      |      |                                                                                                                                    |
|-----------------------|------------|---------|------|------|------|------|------|------------------------------------------------------------------------------------------------------------------------------------|
| LesAffx.21101.1.S1_at | BI924446   | TC21935 | 148  | 94   | 64   | 0.64 | 0.43 | Transcribed locus, weakly similar to NP_001047732.1 [Oryza sativa (japonica cultivar-group)]                                       |
| Les.438.1.S1_at       | AF011556.1 | TC22758 | 1139 | 599  | 488  | 0.53 | 0.43 | jasmonic acid 1                                                                                                                    |
| Les.5715.1.S1_at      | BT014438.1 | TC23114 | 692  | 393  | 296  | 0.57 | 0.43 | Lycopersicon esculentum clone 133760F, mRNA sequence                                                                               |
| Les.376.1.S1_at       | BG627516   | TC24390 | 7392 | 5286 | 3157 | 0.72 | 0.43 | ribulose-1,5-bisphosphate carboxylase, small subunit precursor                                                                     |
| Les.349.1.S1_at       | CN385641   | TC23560 | 174  | 142  | 74   | 0.81 | 0.43 | Transcribed locus                                                                                                                  |
| Les.5817.1.S1_at      | AJ785525   |         | 626  | 349  | 267  | 0.56 | 0.43 | Lycopersicon esculentum clone 134124R, mRNA sequence                                                                               |
| Les.1596.1.A1_at      | BG627098   | TC23373 | 2374 | 2004 | 1011 | 0.84 | 0.43 | Transcribed locus, moderately similar to NP_001051136.1 [Oryza sativa (japonica cultivar-group)]                                   |
| Les.3664.1.S1_at      | U20590.1   | TC22651 | 420  | 261  | 179  | 0.62 | 0.43 | endo-1,4-beta-glucanase precursor                                                                                                  |
| Les.314.1.A1_at       | CK715040   | TC22072 | 1491 | 893  | 633  | 0.6  | 0.42 | Transcribed locus, weakly similar to XP_001084411.1 aquaporin 1 [Macaca mulatta]                                                   |
| LesAffx.17150.1.A1_at | AW039265   | TC23237 | 418  | 238  | 178  | 0.57 | 0.42 | Nitrite reductase                                                                                                                  |
| Les.3119.2.S1_at      | BI927792   | TC23253 | 312  | 245  | 132  | 0.79 | 0.42 | Transcribed locus, weakly similar to XP_001094505.1 proteasome 26S non-ATPase subunit 3 isoform 4 [Macaca mulatta]                 |
| Les.4359.2.A1_at      | BG630798   | TC23326 | 130  | 75   | 55   | 0.58 | 0.42 | Pathogenesis-related protein P2                                                                                                    |
| Les.4886.1.S1_at      | BT012836.1 | BE44961 | 137  | 96   | 58   | 0.7  | 0.42 | Lycopersicon esculentum clone 113902F, mRNA sequence                                                                               |
| LesAffx.25097.1.S1_at | BI926331   | TC22738 | 394  | 613  | 167  | 1.56 | 0.42 | Transcribed locus, weakly similar to NP_194461.1 factor/ zinc ion binding [Arabidopsis thaliana]                                   |
| LesAffx.63209.1.S1_at | AW092854   | AW09285 | 608  | 328  | 256  | 0.54 | 0.42 | ---                                                                                                                                |
| Les.3085.1.S1_at      | BM413323   | TC22204 | 948  | 795  | 399  | 0.84 | 0.42 | Transcribed locus, weakly similar to NP_001042186.1 [Oryza sativa (japonica cultivar-group)]                                       |
| LesAffx.53053.1.S1_at | BI211180   | TC22538 | 1252 | 1249 | 525  | 1    | 0.42 | Transcribed locus, weakly similar to NP_001041735.1 [Oryza sativa (japonica cultivar-group)]                                       |
| Les.3322.2.S1_at      | AW091831   | TC22662 | 706  | 413  | 295  | 0.58 | 0.42 | Transcribed locus, moderately similar to NP_001047599.1 [Oryza sativa (japonica cultivar-group)]                                   |
| Les.2299.1.A1_at      | BG734604   | TC23692 | 396  | 296  | 165  | 0.75 | 0.42 | Transcribed locus, weakly similar to NP_001042472.1 [Oryza sativa (japonica cultivar-group)]                                       |
| Les.1018.1.A1_at      | BG628791   | BG62879 | 276  | 169  | 115  | 0.61 | 0.42 | Transcribed locus                                                                                                                  |
| LesAffx.41477.1.S1_at | AI782352   | TC22420 | 1839 | 1491 | 763  | 0.81 | 0.41 | Transcribed locus, weakly similar to NP_001041763.1 [Oryza sativa (japonica cultivar-group)]                                       |
| LesAffx.37588.1.S1_at | BG124246   | TC21902 | 72   | 53   | 30   | 0.73 | 0.41 | Transcribed locus, weakly similar to NP_001046132.1 [Oryza sativa (japonica cultivar-group)]                                       |
| Les.2888.1.S1_at      | AI491181   | TC22589 | 3139 | 2455 | 1285 | 0.78 | 0.41 | Lycopersicon esculentum clone 113533R, mRNA sequence                                                                               |
| LesAffx.68876.1.S1_at | BE436967   | TC24391 | 4035 | 2556 | 1649 | 0.63 | 0.41 | Transcribed locus, weakly similar to XP_001105188.1 similar to 5,10-methylenetetrahydrofolate reductase isoform 3 [Macaca mulatta] |
| LesAffx.48588.1.S1_at | AW650462   | AW65046 | 361  | 290  | 147  | 0.8  | 0.41 | ---                                                                                                                                |

|                       |            |         |      |      |      |      |      |                                                                                                                                                             |
|-----------------------|------------|---------|------|------|------|------|------|-------------------------------------------------------------------------------------------------------------------------------------------------------------|
| LesAffx.21904.1.S1_at | BM536146   | TC23302 | 310  | 194  | 126  | 0.63 | 0.41 | Transcribed locus, weakly similar to NP_001048363.1 [Oryza sativa (japonica cultivar-group)]                                                                |
| LesAffx.68320.1.S1_at | BM535633   | ES89343 | 914  | 788  | 370  | 0.86 | 0.4  | Transcribed locus, weakly similar to NP_001065587.1 [Oryza sativa (japonica cultivar-group)]                                                                |
| Les.3214.2.S1_at      | BF050423   | TC21991 | 724  | 396  | 292  | 0.55 | 0.4  | Transcribed locus, strongly similar to NP_001064609.1 [Oryza sativa (japonica cultivar-group)]                                                              |
| Les.3070.1.S1_at      | BG126941   | TC22028 | 443  | 467  | 179  | 1.05 | 0.4  | Transcribed locus, weakly similar to NP_001042269.1 [Oryza sativa (japonica cultivar-group)]                                                                |
| Les.3297.3.S1_at      | BM410357   | TC22153 | 249  | 144  | 100  | 0.58 | 0.4  | Transcribed locus, weakly similar to NP_001043493.1 [Oryza sativa (japonica cultivar-group)]                                                                |
| Les.3119.3.S1_at      | AW092353   | TC23253 | 551  | 474  | 222  | 0.86 | 0.4  | Transcribed locus, weakly similar to XP_001094505.1 proteasome 26S non-ATPase subunit 3 isoform 4 [Macaca mulatta]                                          |
| Les.608.1.S1_at       | BG628276   | TC21796 | 5774 | 4080 | 2324 | 0.71 | 0.4  | Lycopersicon esculentum clone 133776F, mRNA sequence                                                                                                        |
| LesAffx.64171.2.S1_at | AI779060   | TC23115 | 1233 | 875  | 495  | 0.71 | 0.4  | Transcribed locus, moderately similar to NP_001041918.1 [Oryza sativa (japonica cultivar-group)]                                                            |
| Les.2934.2.S1_at      | BG128445   | TC22376 | 291  | 208  | 116  | 0.72 | 0.4  | Transcribed locus, weakly similar to NP_001046132.1 [Oryza sativa (japonica cultivar-group)]                                                                |
| Les.2703.1.S1_at      | BG735318   | TC23293 | 2046 | 1108 | 815  | 0.54 | 0.4  | Lycopersicon esculentum clone 132109R, mRNA sequence                                                                                                        |
| LesAffx.41477.2.S1_at | BI924534   | TC22420 | 1782 | 1426 | 710  | 0.8  | 0.4  | Transcribed locus, weakly similar to NP_001041763.1 [Oryza sativa (japonica cultivar-group)]                                                                |
| LesAffx.64062.1.S1_at | AW040768   | TC22080 | 133  | 92   | 53   | 0.69 | 0.4  | Transcribed locus, weakly similar to NP_001042589.1 [Oryza sativa (japonica cultivar-group)]                                                                |
| LesAffx.38304.1.S1_at | AI782644   | TC21999 | 44   | 33   | 18   | 0.73 | 0.4  | Transcribed locus, weakly similar to NP_172098.1 (DELTA 9 DESATURASE 1); iron ion binding / oxidoreductase/ stearyl-CoA 9-desaturase [Arabidopsis thaliana] |
| Les.2024.2.S1_at      | BG642995   | AI48435 | 1558 | 925  | 619  | 0.59 | 0.4  | Transcribed locus, weakly similar to XP_001105201.1 fructose-1,6-bisphosphatase 1 isoform 1 [Macaca mulatta]                                                |
| Les.641.1.S1_at       | BG626664   | TC23339 | 1533 | 834  | 608  | 0.54 | 0.4  | Lycopersicon esculentum clone 132316F, mRNA sequence                                                                                                        |
| Les.84.1.S1_at        | U50151.1   | TC21723 | 968  | 1150 | 384  | 1.19 | 0.4  | leucine aminopeptidase                                                                                                                                      |
| Les.1968.1.A1_at      | BG628724   | TC23891 | 512  | 470  | 203  | 0.92 | 0.4  | Transcribed locus, weakly similar to NP_001065587.1 [Oryza sativa (japonica cultivar-group)]                                                                |
| LesAffx.29801.1.S1_at | AI489456   | TC23187 | 5026 | 5603 | 1985 | 1.11 | 0.39 | Transcribed locus, weakly similar to NP_001042186.1 [Oryza sativa (japonica cultivar-group)]                                                                |
| LesAffx.64171.1.S1_at | AW622064   | TC23115 | 1424 | 996  | 561  | 0.7  | 0.39 | Transcribed locus, moderately similar to NP_001041918.1 [Oryza sativa (japonica cultivar-group)]                                                            |
| Les.3073.1.S1_at      | AJ785415   | TC21760 | 297  | 227  | 117  | 0.77 | 0.39 | Fruit-ripening protein                                                                                                                                      |
| Les.3741.1.S1_at      | AF146691.1 | TC23195 | 942  | 1160 | 370  | 1.23 | 0.39 | Eli3 protein                                                                                                                                                |

|                       |            |         |      |      |      |      |      |                                                                                                                    |
|-----------------------|------------|---------|------|------|------|------|------|--------------------------------------------------------------------------------------------------------------------|
| Les.3180.1.S1_at      | AI775150   | DB70250 | 340  | 214  | 133  | 0.63 | 0.39 | Transcribed locus, weakly similar to NP_001048006.1 [Oryza sativa (japonica cultivar-group)]                       |
| Les.3175.1.S1_at      | BG626608   | TC23958 | 3659 | 2252 | 1429 | 0.62 | 0.39 | Lycopersicon esculentum clone 132976F, mRNA sequence                                                               |
| Les.614.1.A1_at       | BG626522   | BG62652 | 394  | 283  | 154  | 0.72 | 0.39 | Transcribed locus                                                                                                  |
| Les.1198.1.A1_at      | BG630006   | TC22356 | 125  | 87   | 49   | 0.7  | 0.39 | Transcribed locus, weakly similar to XP_001111095.1 aldolase B isoform 5 [Macaca mulatta]                          |
| LesAffx.66600.1.S1_at | AW040689   | TC23173 | 2302 | 1709 | 895  | 0.74 | 0.39 | Transcribed locus, moderately similar to NP_001045167.1 [Oryza sativa (japonica cultivar-group)]                   |
| Les.2971.1.S1_at      | AI781668   | TC23191 | 1083 | 972  | 419  | 0.9  | 0.39 | Wound-induced proteinase inhibitor I prepropeptide                                                                 |
| LesAffx.81.2.S1_at    | AW648752   | TC22482 | 3212 | 2441 | 1244 | 0.76 | 0.39 | Transcribed locus, weakly similar to XP_001090175.1 hypothetical protein LOC51507 isoform 2 [Macaca mulatta]       |
| Les.4259.1.S1_at      | BG629037   | TC24424 | 5274 | 2855 | 2042 | 0.54 | 0.39 | Transcribed locus, weakly similar to XP_001082599.1 cysteine and glycine-rich protein 2 [Macaca mulatta]           |
| Les.3286.1.S1_at      | BT013249.1 | TC23425 | 2555 | 2905 | 989  | 1.14 | 0.39 | Lycopersicon esculentum inducible plastid-lipid associated protein (CHRD)                                          |
| LesAffx.64540.1.S1_at | AW441832   | TC22052 | 1305 | 1254 | 500  | 0.96 | 0.38 | Transcribed locus, moderately similar to NP_001053805.1 [Oryza sativa (japonica cultivar-group)]                   |
| LesAffx.30938.1.A1_at | AJ785088   | TC22113 | 274  | 143  | 105  | 0.52 | 0.38 | Transcribed locus, weakly similar to NP_001042177.1 [Oryza sativa (japonica cultivar-group)]                       |
| Les.3017.2.S1_at      | AW738744   | TC23031 | 2032 | 1434 | 774  | 0.71 | 0.38 | Transcribed locus, weakly similar to XP_001084411.1 aquaporin 1 [Macaca mulatta]                                   |
| LesAffx.71016.1.S1_at | BI923152   | TC24047 | 935  | 610  | 356  | 0.65 | 0.38 | Transcribed locus, weakly similar to NP_001052012.1 [Oryza sativa (japonica cultivar-group)]                       |
| Les.2964.1.A1_at      | BG627802   | TC23599 | 931  | 758  | 354  | 0.81 | 0.38 | Transcribed locus, weakly similar to NP_001042324.1 [Oryza sativa (japonica cultivar-group)]                       |
| Les.4371.1.A1_s_at    | X72731.1   | TC21794 | 3961 | 2120 | 1507 | 0.54 | 0.38 | (ERT 13) ripening-related mRNA                                                                                     |
| Les.5617.1.S1_at      | BT014260.1 | TC21794 | 6494 | 3390 | 2447 | 0.52 | 0.38 | CDNA, clone: FC07DG10, HTC in fruit /// Lycopersicon esculentum clone 133464R, mRNA sequence                       |
| Les.5017.1.S1_at      | BT013110.1 | TC23613 | 405  | 295  | 153  | 0.73 | 0.38 | Lycopersicon esculentum clone 114397F, mRNA sequence                                                               |
| Les.1478.1.S1_at      | BG631500   | TC23304 | 1117 | 932  | 419  | 0.83 | 0.37 | Lycopersicon esculentum clone 114252R, mRNA sequence                                                               |
| Les.2173.1.A1_at      | BG631444   | TC23409 | 255  | 206  | 95   | 0.81 | 0.37 | Transcribed locus, weakly similar to NP_001044532.1 [Oryza sativa (japonica cultivar-group)]                       |
| LesAffx.53857.2.S1_at | AI776010   | TC23441 | 121  | 104  | 45   | 0.86 | 0.37 | ---                                                                                                                |
| Les.3119.1.A1_at      | AW037265   | TC23253 | 527  | 433  | 196  | 0.82 | 0.37 | Transcribed locus, weakly similar to XP_001094505.1 proteasome 26S non-ATPase subunit 3 isoform 4 [Macaca mulatta] |
| Les.5017.1.A1_at      | BT013110.1 | TC23613 | 1233 | 907  | 458  | 0.74 | 0.37 | Lycopersicon esculentum clone 114397F, mRNA sequence                                                               |
| Les.4727.1.S1_at      | AI776392   |         | 2720 | 2259 | 1003 | 0.83 | 0.37 | Lycopersicon esculentum clone 133381R, mRNA sequence                                                               |

|                       |            |         |      |      |      |      |      |                                                                                                              |
|-----------------------|------------|---------|------|------|------|------|------|--------------------------------------------------------------------------------------------------------------|
| Les.3180.2.S1_at      | AI775197   | TC22419 | 305  | 204  | 112  | 0.67 | 0.37 | Transcribed locus, weakly similar to NP_001048006.1 [Oryza sativa (japonica cultivar-group)]                 |
| Les.355.1.A1_at       | BG627591   | TC23931 | 641  | 369  | 235  | 0.58 | 0.37 | Transcribed locus                                                                                            |
| LesAffx.29801.1.A1_at | AI489456   | TC23187 | 287  | 325  | 105  | 1.13 | 0.37 | Transcribed locus, weakly similar to NP_001042186.1 [Oryza sativa (japonica cultivar-group)]                 |
| Les.314.2.S1_at       | AW217816   | BG64268 | 1377 | 780  | 504  | 0.57 | 0.37 | Transcribed locus, weakly similar to XP_001084411.1 aquaporin 1 [Macaca mulatta]                             |
| LesAffx.14110.2.A1_at | AW932597   | TC23949 | 214  | 153  | 78   | 0.72 | 0.36 | Transcribed locus, weakly similar to NP_001042660.1 [Oryza sativa (japonica cultivar-group)]                 |
| LesAffx.13481.2.S1_at | BI921546   | TC22621 | 1155 | 1193 | 421  | 1.03 | 0.36 | Transcribed locus, weakly similar to NP_001044052.1 [Oryza sativa (japonica cultivar-group)]                 |
| Les.3180.3.A1_at      | BG734557   | TC23323 | 1153 | 737  | 417  | 0.64 | 0.36 | Transcribed locus, weakly similar to NP_001048006.1 [Oryza sativa (japonica cultivar-group)]                 |
| LesAffx.13481.2.A1_at | BI921546   | TC22621 | 2060 | 2202 | 738  | 1.07 | 0.36 | Transcribed locus, weakly similar to NP_001044052.1 [Oryza sativa (japonica cultivar-group)]                 |
| LesAffx.13481.1.S1_at | BG134320   | TC22621 | 1467 | 1619 | 519  | 1.1  | 0.35 | Transcribed locus, weakly similar to NP_001044052.1 [Oryza sativa (japonica cultivar-group)]                 |
| Les.1079.3.A1_at      | BG626088   | GO37592 | 58   | 29   | 20   | 0.51 | 0.35 | Transcribed locus, weakly similar to NP_001043162.1 [Oryza sativa (japonica cultivar-group)]                 |
| Les.4492.3.S1_at      | CK715138   | TC22356 | 2021 | 1067 | 711  | 0.53 | 0.35 | Transcribed locus, weakly similar to XP_001111095.1 aldolase B isoform 5 [Macaca mulatta]                    |
| Les.3593.1.S1_at      | BT012763.1 | TC23407 | 2036 | 1602 | 714  | 0.79 | 0.35 | TAS14 peptide (AA 1-130)                                                                                     |
| LesAffx.81.1.S1_at    | BG135419   | TC23216 | 1169 | 868  | 407  | 0.74 | 0.35 | Transcribed locus, weakly similar to XP_001090175.1 hypothetical protein LOC51507 isoform 2 [Macaca mulatta] |
| Les.695.1.A1_at       | BG626949   | TC23503 | 693  | 451  | 240  | 0.65 | 0.35 | Transcribed locus, weakly similar to NP_001042986.1 [Oryza sativa (japonica cultivar-group)]                 |
| LesAffx.1.1.S1_at     | AY656838.1 | TC21732 | 755  | 939  | 259  | 1.24 | 0.34 | arginase 2                                                                                                   |
| LesAffx.18330.1.S1_at | BG129699   | TC24342 | 975  | 588  | 333  | 0.6  | 0.34 | Transcribed locus, weakly similar to NP_001046074.1 [Oryza sativa (japonica cultivar-group)]                 |
| Les.5318.1.S1_at      | BT013703.1 | TC24128 | 4198 | 2583 | 1434 | 0.62 | 0.34 | Lycopersicon esculentum clone 132545F, mRNA sequence                                                         |
| Les.506.1.A1_at       | BG625957   | TC22672 | 220  | 169  | 75   | 0.77 | 0.34 | Transcribed locus                                                                                            |
| LesAffx.53857.1.S1_at | AI773690   | TC23441 | 170  | 129  | 58   | 0.76 | 0.34 | Transcribed locus, weakly similar to NP_001043047.1 [Oryza sativa (japonica cultivar-group)]                 |
| LesAffx.14110.2.S1_at | AW932597   | TC23949 | 1775 | 1121 | 595  | 0.63 | 0.33 | Transcribed locus, weakly similar to NP_001042660.1 [Oryza sativa (japonica cultivar-group)]                 |
| LesAffx.69295.1.S1_at | BI933687   | TC23040 | 453  | 240  | 151  | 0.53 | 0.33 | Transcribed locus, weakly similar to NP_001045746.1 [Oryza sativa (japonica cultivar-group)]                 |



|                       |            |         |       |      |      |      |      |                                                                                                  |
|-----------------------|------------|---------|-------|------|------|------|------|--------------------------------------------------------------------------------------------------|
| Les.424.1.S1_at       | BG628349   | TC22847 | 2115  | 1578 | 704  | 0.75 | 0.33 | Transcribed locus, weakly similar to NP_001041744.1 [Oryza sativa (japonica cultivar-group)]     |
| Les.3741.1.A1_at      | AF146691.1 | TC23195 | 435   | 458  | 141  | 1.05 | 0.32 | Eli3 protein                                                                                     |
| Les.424.2.S1_at       | AI776305   | TC22847 | 1867  | 1362 | 602  | 0.73 | 0.32 | Transcribed locus, weakly similar to NP_001041744.1 [Oryza sativa (japonica cultivar-group)]     |
| Les.1923.1.S1_at      | BG630193   | TC23497 | 402   | 286  | 129  | 0.71 | 0.32 | Transcribed locus, moderately similar to NP_001066340.1 [Oryza sativa (japonica cultivar-group)] |
| LesAffx.47070.1.S1_at | AW651406   | AW65140 | 38    | 24   | 12   | 0.64 | 0.32 | Transcribed locus, moderately similar to NP_001042375.1 [Oryza sativa (japonica cultivar-group)] |
| Les.4617.1.S1_at      | BT014212.1 | TC23312 | 1489  | 1145 | 478  | 0.77 | 0.32 | Lycopersicon esculentum clone 133389F, mRNA sequence                                             |
| LesAffx.3537.1.S1_at  | AJ784726   | TC24068 | 374   | 223  | 118  | 0.6  | 0.32 | ---                                                                                              |
| Les.4181.1.A1_at      | BG630015   | TC22910 | 185   | 110  | 58   | 0.6  | 0.31 | Transcribed locus                                                                                |
| Les.2457.1.A1_at      | BG630077   | TC22085 | 1433  | 1197 | 446  | 0.84 | 0.31 | Transcribed locus                                                                                |
| Les.5864.1.S1_at      | U20596.1   | TC23921 | 3526  | 2022 | 1096 | 0.57 | 0.31 | hypothetical LOC544002                                                                           |
| Les.228.1.S1_a_at     | CK714929   | TC23208 | 10238 | 7297 | 3165 | 0.71 | 0.31 | hypothetical LOC543672                                                                           |
| Les.2415.2.S1_at      | BE431455   | TC23842 | 1362  | 769  | 417  | 0.56 | 0.31 | Transcribed locus, moderately similar to NP_001061906.1 [Oryza sativa (japonica cultivar-group)] |
| Les.4953.1.S1_at      | BT012976.1 | TC23170 | 800   | 407  | 244  | 0.51 | 0.31 | Lycopersicon esculentum clone 114187R, mRNA sequence                                             |
| Les.3983.1.S1_at      | U20591.1   | TC23477 | 104   | 68   | 31   | 0.65 | 0.3  | flower-specific gamma-thionin-like protein/acidic protein precursor                              |
| Les.3299.2.A1_s_at    | BG626957   | TC21732 | 606   | 799  | 181  | 1.32 | 0.3  | arginase 2                                                                                       |
| Les.3217.2.S1_at      | CK575028   | TC24389 | 7031  | 6638 | 2094 | 0.94 | 0.3  | Ribulose-1,5-bisphosphate carboxylase, small subunit precursor                                   |
| Les.4412.1.A1_at      | BG627732   | TC23503 | 1315  | 682  | 385  | 0.52 | 0.29 | Transcribed locus, weakly similar to NP_001042986.1 [Oryza sativa (japonica cultivar-group)]     |
| Les.4522.1.S1_at      | AY497477.1 | TC23773 | 980   | 1072 | 283  | 1.09 | 0.29 | xyloglucan endotransglucosylase-hydrolase XTH6                                                   |
| LesAffx.3537.1.A1_at  | AJ784726   | TC24068 | 2166  | 1160 | 611  | 0.54 | 0.28 | ---                                                                                              |
| Les.228.1.S1_at       | CK714929   | TC23208 | 6131  | 4239 | 1724 | 0.69 | 0.28 | hypothetical LOC543672                                                                           |
| Les.810.1.S1_at       | BG627575   | TC22972 | 542   | 309  | 152  | 0.57 | 0.28 | Lycopersicon esculentum clone 133744F, mRNA sequence                                             |
| Les.2415.3.A1_at      | BG735370   | TC23842 | 2172  | 1186 | 605  | 0.55 | 0.28 | Transcribed locus, moderately similar to NP_001061906.1 [Oryza sativa (japonica cultivar-group)] |
| Les.4428.1.S1_at      | AW443158   | DB69734 | 178   | 222  | 49   | 1.25 | 0.27 | carbonic anhydrase                                                                               |
| Les.4345.4.A1_x_at    | BG631293   | TC22725 | 1975  | 1177 | 533  | 0.6  | 0.27 | Pathogenesis-related protein P2                                                                  |
| Les.2316.2.A1_at      | BG626036   | TC22940 | 1125  | 801  | 302  | 0.71 | 0.27 | Transcribed locus, weakly similar to NP_001044252.1 [Oryza sativa (japonica cultivar-group)]     |
| Les.2933.1.S1_at      | BT012764.1 | TC23454 | 2715  | 1543 | 722  | 0.57 | 0.27 | Lycopersicon esculentum clone 113710R, mRNA sequence                                             |
| Les.5157.1.S1_at      | BT013405.1 | TC23882 | 3739  | 2430 | 987  | 0.65 | 0.26 | Lycopersicon esculentum clone 135719R, mRNA sequence                                             |

|                       |            |         |      |      |      |      |      |                                                                                                                           |
|-----------------------|------------|---------|------|------|------|------|------|---------------------------------------------------------------------------------------------------------------------------|
| Les.2316.1.S1_at      | AW623527   | TC22940 | 977  | 628  | 257  | 0.64 | 0.26 | Transcribed locus, weakly similar to NP_001044252.1 [Oryza sativa (japonica cultivar-group)]                              |
| LesAffx.70136.2.S1_at | AI899680   | TC23538 | 396  | 248  | 104  | 0.63 | 0.26 | Transcribed locus, weakly similar to NP_001044898.1 [Oryza sativa (japonica cultivar-group)]                              |
| LesAffx.56221.1.S1_at | AI894713   | TC24290 | 152  | 144  | 38   | 0.95 | 0.25 | Transcribed locus, weakly similar to NP_001042068.1 [Oryza sativa (japonica cultivar-group)]                              |
| LesAffx.57251.1.S1_at | BI208760   | TC22155 | 60   | 35   | 15   | 0.58 | 0.25 | Transcribed locus, weakly similar to NP_001043814.1 [Oryza sativa (japonica cultivar-group)]                              |
| Les.4974.1.S1_at      | BT013031.1 | TC23280 | 871  | 702  | 215  | 0.81 | 0.25 | Lycopersicon esculentum clone 114279F, mRNA sequence                                                                      |
| Les.4258.1.A1_at      | BG626687   | TC23571 | 869  | 660  | 214  | 0.76 | 0.25 | Transcribed locus, weakly similar to XP_001104139.1 similar to aarF domain containing kinase 1 isoform 2 [Macaca mulatta] |
| Les.1314.1.S1_at      | BG630759   | TC24293 | 281  | 344  | 68   | 1.22 | 0.24 | Transcribed locus                                                                                                         |
| Les.4345.4.A1_at      | BG631293   | TC22725 | 2337 | 1342 | 563  | 0.57 | 0.24 | Pathogenesis-related protein P2                                                                                           |
| Les.1832.1.A1_at      | BG629451   | TC23307 | 1317 | 1472 | 310  | 1.12 | 0.24 | Transcribed locus, moderately similar to NP_001062542.1 [Oryza sativa (japonica cultivar-group)]                          |
| Les.233.1.S1_at       | M17558.1   | TC23200 | 3068 | 1602 | 718  | 0.52 | 0.23 | chlorophyll a/b-binding protein precursor                                                                                 |
| Les.3070.2.A1_at      | BG629293   | TC22028 | 790  | 788  | 182  | 1    | 0.23 | Transcribed locus, weakly similar to NP_001042269.1 [Oryza sativa (japonica cultivar-group)]                              |
| Les.3924.1.S1_at      | BE433308   | TC23702 | 5583 | 4652 | 1283 | 0.83 | 0.23 | Hypothetical protein LOC778199                                                                                            |
| Les.4508.2.S1_s_at    | AW623685   | TC23882 | 4124 | 2767 | 944  | 0.67 | 0.23 | Lycopersicon esculentum clone 135719R, mRNA sequence                                                                      |
| Les.4345.3.S1_x_at    | AI775226   | TC22725 | 4099 | 2181 | 937  | 0.53 | 0.23 | Pathogenesis-related protein P2                                                                                           |
| Les.4258.3.S1_at      | BG128812   | TC23571 | 482  | 345  | 110  | 0.72 | 0.23 | Transcribed locus, weakly similar to XP_001104139.1 similar to aarF domain containing kinase 1 isoform 2 [Macaca mulatta] |
| LesAffx.69609.1.S1_at | AW929283   | TC23404 | 211  | 220  | 47   | 1.04 | 0.22 | Transcribed locus, weakly similar to NP_001043990.1 [Oryza sativa (japonica cultivar-group)]                              |
| Les.3128.2.S1_s_at    | BI423262   | TC23347 | 523  | 426  | 114  | 0.81 | 0.22 | Lycopersicon esculentum clone 114279F, mRNA sequence                                                                      |
| Les.1219.1.A1_at      | BG630155   | TC23499 | 242  | 189  | 53   | 0.78 | 0.22 | Transcribed locus, weakly similar to NP_001047376.1 [Oryza sativa (japonica cultivar-group)]                              |
| Les.147.1.S1_at       | BG629070   | TC22473 | 162  | 157  | 34   | 0.97 | 0.21 | chlorophyll a/b-binding protein precursor                                                                                 |
| Les.4508.1.S1_s_at    | AI780576   | BG12438 | 3489 | 2137 | 702  | 0.61 | 0.2  | Lycopersicon esculentum clone 135719R, mRNA sequence                                                                      |
| Les.4923.1.S1_at      | BT012912.1 | TC22925 | 547  | 747  | 110  | 1.37 | 0.2  | Lycopersicon esculentum clone 114030R, mRNA sequence                                                                      |
| Les.3376.1.A1_at      | BG630058   | TC21732 | 3840 | 3331 | 758  | 0.87 | 0.2  | CONSTANS interacting protein 1                                                                                            |
| Les.4868.1.S1_at      | BT012795.1 | TC22912 | 188  | 104  | 34   | 0.55 | 0.18 | Lycopersicon esculentum clone 113794R, mRNA sequence                                                                      |
| Les.327.1.S1_at       | BT014378.1 | TC22961 | 3584 | 3365 | 653  | 0.94 | 0.18 | Lycopersicon esculentum clone 133667F, mRNA sequence                                                                      |
| Les.3054.1.S1_at      | AI773693   | TC23429 | 4281 | 2208 | 763  | 0.52 | 0.18 | Lycopersicon esculentum clone 135718R, mRNA sequence                                                                      |
| Les.3376.2.S1_at      | AW932459   | TC21732 | 1772 | 1445 | 311  | 0.82 | 0.18 | CONSTANS interacting protein 1                                                                                            |

|                       |            |         |      |      |      |      |      |                                                                                                                                 |
|-----------------------|------------|---------|------|------|------|------|------|---------------------------------------------------------------------------------------------------------------------------------|
| Les.4281.2.S1_at      | BI926015   | DB69892 | 703  | 477  | 113  | 0.68 | 0.16 | Transcribed locus, weakly similar to XP_001110787.1 ectonucleoside triphosphate diphosphohydrolase 3 [Macaca mulatta]           |
| Les.4281.1.A1_at      | BG626715   | TC21921 | 1277 | 899  | 202  | 0.7  | 0.16 | Transcribed locus, weakly similar to XP_001110787.1 ectonucleoside triphosphate diphosphohydrolase 3 [Macaca mulatta]           |
| Les.4281.3.S1_at      | AI771846   | TC21921 | 145  | 77   | 19   | 0.53 | 0.13 | Transcribed locus, weakly similar to XP_001110787.1 ectonucleoside triphosphate diphosphohydrolase 3 [Macaca mulatta]           |
| Les.2504.1.A1_at      | BG628687   | TC23404 | 576  | 612  | 59   | 1.06 | 0.1  | Transcribed locus, weakly similar to NP_001043990.1 [Oryza sativa (japonica cultivar-group)]                                    |
| Les.4988.1.S1_at      | BT013056.1 | TC22946 | 3222 | 1848 | 263  | 0.57 | 0.08 | Lycopersicon esculentum clone 114312R, mRNA sequence                                                                            |
| Les.4345.1.S1_at      | BG629758   | TC23353 | 5903 | 2979 | 1334 | 0.5  | 0.23 | Lycopersicon esculentum clone 133385R, mRNA sequence                                                                            |
| LesAffx.3438.1.A1_at  | CN385709   | TC23123 | 1375 | 694  | 948  | 0.5  | 0.69 | Transcribed locus, weakly similar to XP_001092746.1 similar to HTPAP protein [Macaca mulatta]                                   |
| LesAffx.69264.1.S1_at | BF113833   | TC23903 | 1540 | 775  | 1364 | 0.5  | 0.89 | Transcribed locus, weakly similar to NP_001047317.1 [Oryza sativa (japonica cultivar-group)]                                    |
| Les.5201.1.S1_at      | BT013496.1 | FS19239 | 465  | 234  | 337  | 0.5  | 0.72 | Lycopersicon esculentum clone 132182F, mRNA sequence                                                                            |
| Les.2119.1.A1_s_at    | BG626940   | FS19239 | 1178 | 592  | 865  | 0.5  | 0.73 | Lycopersicon esculentum clone 132182F, mRNA sequence                                                                            |
| Les.5382.1.S1_at      | BT013811.1 | AI48888 | 2026 | 1018 | 1122 | 0.5  | 0.55 | Lycopersicon esculentum clone 132732F, mRNA sequence                                                                            |
| Les.842.2.S1_a_at     | AI896617   | TC23080 | 1619 | 813  | 1111 | 0.5  | 0.69 | Transcribed locus, weakly similar to NP_001042177.1 [Oryza sativa (japonica cultivar-group)]                                    |
| Les.4615.1.S1_at      | BE462687   | TC22537 | 3675 | 1844 | 3664 | 0.5  | 1    | Lycopersicon esculentum clone 113657R, mRNA sequence                                                                            |
| Les.1212.1.S1_at      | AY584532.1 | GO37246 | 6785 | 3400 | 4341 | 0.5  | 0.64 | DWARF1/DIMINUTO                                                                                                                 |
| Les.1721.1.A1_at      | BG628370   | TC22831 | 398  | 199  | 265  | 0.5  | 0.67 | Transcribed locus, weakly similar to NP_001065760.1 [Oryza sativa (japonica cultivar-group)]                                    |
| LesAffx.70738.1.A1_at | BG630069   | TC23199 | 1263 | 633  | 482  | 0.5  | 0.38 | Transcribed locus, weakly similar to XP_001101267.1 similar to myeloblastosis proto-oncogene product isoform 2 [Macaca mulatta] |
| LesAffx.37212.1.A1_at | AI491145   | TC23069 | 172  | 86   | 42   | 0.5  | 0.24 | ---                                                                                                                             |
| LesAffx.62349.1.S1_at | BI207106   | TC22646 | 1973 | 985  | 1984 | 0.5  | 1.01 | Transcribed locus, weakly similar to NP_001045429.1 [Oryza sativa (japonica cultivar-group)]                                    |
| LesAffx.60159.1.S1_at | BG134596   | TC23159 | 67   | 34   | 31   | 0.5  | 0.47 | ---                                                                                                                             |
| Les.2305.1.S1_at      | AW622769   | TC22654 | 3476 | 1735 | 1568 | 0.5  | 0.45 | Transcribed locus, weakly similar to NP_001044221.1 [Oryza sativa (japonica cultivar-group)]                                    |
| Les.1784.1.S1_at      | BI931777   | TC24140 | 2664 | 1327 | 1199 | 0.5  | 0.45 | Transcribed locus, weakly similar to XP_001118335.1 similar to intestinal facilitative glucose transporter 7 [Macaca mulatta]   |
| Les.3297.2.S1_at      | AI773077   | TC23571 | 820  | 407  | 191  | 0.5  | 0.23 | Transcribed locus, weakly similar to NP_001043493.1 [Oryza sativa (japonica cultivar-group)]                                    |

|                       |            |         |      |      |      |      |      |                                                                                                  |
|-----------------------|------------|---------|------|------|------|------|------|--------------------------------------------------------------------------------------------------|
| LesAffx.20929.1.S1_at | BI206813   | TC23621 | 416  | 206  | 138  | 0.5  | 0.33 | Transcribed locus, weakly similar to NP_001051650.1 [Oryza sativa (japonica cultivar-group)]     |
| LesAffx.58110.1.S1_at | BE435276   | BE43527 | 1150 | 570  | 530  | 0.5  | 0.46 | ---                                                                                              |
| Les.3123.1.S1_at      | BT013406.1 | TC23016 | 2937 | 1452 | 1105 | 0.49 | 0.38 | Lycopersicon esculentum clone 135721R, mRNA sequence                                             |
| LesAffx.49935.1.S1_at | BF097557   | TC23282 | 945  | 467  | 965  | 0.49 | 1.02 | Transcribed locus, moderately similar to NP_001042088.1 [Oryza sativa (japonica cultivar-group)] |
| LesAffx.66879.1.A1_at | BG631312   | TC22769 | 1426 | 704  | 1154 | 0.49 | 0.81 | CDNA, clone: FC04CE09, HTC in fruit                                                              |
| Les.1721.2.S1_at      | BF113580   | TC22831 | 141  | 69   | 93   | 0.49 | 0.66 | Transcribed locus, weakly similar to NP_001065760.1 [Oryza sativa (japonica cultivar-group)]     |
| Les.3702.1.A1_at      | AJ785373   | TC23512 | 34   | 17   | 22   | 0.49 | 0.66 | IAA10 protein                                                                                    |
| Les.4345.2.A1_x_at    | AI781554   | TC23670 | 4258 | 2099 | 889  | 0.49 | 0.21 | Pathogenesis-related protein P2                                                                  |
| Les.3742.1.S1_at      | AF146690.1 | TC22347 | 1195 | 588  | 444  | 0.49 | 0.37 | Pto-responsive gene 1 protein                                                                    |
| LesAffx.39973.1.S1_at | BI932177   | DV10487 | 334  | 165  | 221  | 0.49 | 0.66 | Transcribed locus, weakly similar to NP_001044052.1 [Oryza sativa (japonica cultivar-group)]     |
| Les.5290.1.S1_at      | BT013644.1 | TC23296 | 2951 | 1445 | 2268 | 0.49 | 0.77 | Lycopersicon esculentum clone 132449R, mRNA sequence                                             |
| Les.2909.2.S1_at      | BM413099   | TC22288 | 2771 | 1357 | 970  | 0.49 | 0.35 | Transcribed locus, weakly similar to NP_001041799.1 [Oryza sativa (japonica cultivar-group)]     |
| Les.822.1.A1_at       | BG629497   | BG73456 | 839  | 410  | 422  | 0.49 | 0.5  | Transcribed locus                                                                                |
| Les.790.1.A1_at       | BG627458   | TC23127 | 293  | 143  | 133  | 0.49 | 0.45 | Transcribed locus, weakly similar to NP_001052896.1 [Oryza sativa (japonica cultivar-group)]     |
| Les.4769.1.S1_at      | BT012708.1 | TC21756 | 1314 | 640  | 967  | 0.49 | 0.74 | Lycopersicon esculentum clone 113586R, mRNA sequence                                             |
| LesAffx.24696.1.S1_at | AW034874   | DB70637 | 106  | 52   | 244  | 0.49 | 2.31 | Transcribed locus, weakly similar to NP_001043378.1 [Oryza sativa (japonica cultivar-group)]     |
| Les.3479.1.S1_at      | AF347614.1 | TC22134 | 2571 | 1252 | 1850 | 0.49 | 0.72 | sulfate transporter 2                                                                            |
| Les.5670.1.S1_at      | BT014359.1 | TC22878 | 229  | 111  | 255  | 0.49 | 1.11 | Lycopersicon esculentum clone 133637R, mRNA sequence                                             |
| LesAffx.37212.1.S1_at | AI491145   | TC23069 | 699  | 340  | 165  | 0.49 | 0.24 | ---                                                                                              |
| Les.4345.2.A1_a_at    | AI781554   | TC23670 | 3718 | 1802 | 725  | 0.48 | 0.2  | Lycopersicon esculentum clone 133385R, mRNA sequence                                             |
| Les.5745.1.S1_at      | BT014484.1 | TC22393 | 876  | 425  | 285  | 0.48 | 0.33 | Lycopersicon esculentum clone 133838F, mRNA sequence                                             |
| Les.2286.1.S1_at      | BT013195.1 | TC22726 | 2309 | 1119 | 1128 | 0.48 | 0.49 | Lycopersicon esculentum clone 134347F, mRNA sequence                                             |
| Les.2168.1.S1_at      | BT013274.1 | TC23964 | 3890 | 1884 | 465  | 0.48 | 0.12 | Lycopersicon esculentum clone 134851R, mRNA sequence                                             |
| Les.2659.1.S1_at      | BE458733   | TC23900 | 274  | 133  | 211  | 0.48 | 0.77 | Transcribed locus, weakly similar to NP_001053382.1 [Oryza sativa (japonica cultivar-group)]     |
| Les.1348.1.A1_at      | BG631005   | TC22489 | 1072 | 518  | 499  | 0.48 | 0.47 | Transcribed locus, weakly similar to NP_199517.1 protein [Arabidopsis thaliana]                  |
| Les.5075.1.S1_at      | BT013228.1 | TC21844 | 1615 | 780  | 1112 | 0.48 | 0.69 | Lycopersicon esculentum clone 134470F, mRNA sequence                                             |
| Les.4992.1.S1_at      | BT013060.1 | TC23556 | 1607 | 776  | 703  | 0.48 | 0.44 | Lycopersicon esculentum clone 114316R, mRNA sequence                                             |
| Les.173.1.S1_at       | AY725511.1 | TC21987 | 2098 | 1013 | 862  | 0.48 | 0.41 | LePIP1 protein                                                                                   |

|                       |            |         |      |      |      |      |      |                                                                                              |
|-----------------------|------------|---------|------|------|------|------|------|----------------------------------------------------------------------------------------------|
| Les.5437.1.S1_at      | CK715969   | TC24035 | 1136 | 548  | 352  | 0.48 | 0.31 | Lycopersicon esculentum clone 132916F, mRNA sequence                                         |
| Les.5221.1.S1_at      | BT013523.1 | TC24473 | 551  | 265  | 515  | 0.48 | 0.93 | Lycopersicon esculentum clone 132241R, mRNA sequence                                         |
| Les.252.1.S1_at       | U35643.1   | DB68734 | 4907 | 2364 | 3795 | 0.48 | 0.77 | Alpha-dioxygenase 2                                                                          |
| Les.2012.1.S1_at      | BG627650   | TC23373 | 237  | 114  | 75   | 0.48 | 0.32 | Myo-inositol-1-phosphate synthase                                                            |
| Les.4899.1.S1_at      | BT012863.1 |         | 43   | 20   | 33   | 0.48 | 0.76 | Lycopersicon esculentum clone 113951F, mRNA sequence                                         |
| Les.2831.1.S1_at      | BG627219   | TC22500 | 3062 | 1470 | 2660 | 0.48 | 0.87 | Lycopersicon esculentum clone 132363R, mRNA sequence                                         |
| LesAffx.66705.1.S1_at | BI207021   | TC23871 | 1777 | 852  | 867  | 0.48 | 0.49 | Transcribed locus, moderately similar to NP_197266.1 protein [Arabidopsis thaliana]          |
| LesAffx.35363.1.S1_at | AW621326   | TC23283 | 1478 | 708  | 809  | 0.48 | 0.55 | Transcribed locus, weakly similar to NP_001046337.1 [Oryza sativa (japonica cultivar-group)] |
| Les.1192.2.S1_at      | BG643122   | TC23222 | 942  | 450  | 744  | 0.48 | 0.79 | Transcribed locus                                                                            |
| LesAffx.885.1.S1_at   | BI205930   | BI20593 | 563  | 269  | 296  | 0.48 | 0.52 | ---                                                                                          |
| Les.2174.1.S1_at      | CN384833   | TC22746 | 171  | 82   | 60   | 0.48 | 0.35 | Transcribed locus                                                                            |
| Les.4929.1.S1_at      | BT012922.1 | TC22857 | 85   | 41   | 40   | 0.48 | 0.47 | Lycopersicon esculentum clone 114085R, mRNA sequence                                         |
| LesAffx.57293.1.S1_at | AI779530   | AI77953 | 101  | 48   | 23   | 0.47 | 0.23 | ---                                                                                          |
| Les.2909.1.S1_at      | AW223174   | TC24474 | 1808 | 855  | 633  | 0.47 | 0.35 | Transcribed locus, weakly similar to NP_001041799.1 [Oryza sativa (japonica cultivar-group)] |
| Les.4982.1.S1_at      | BT013044.1 | AW62120 | 247  | 117  | 112  | 0.47 | 0.45 | Lycopersicon esculentum clone 114294R, mRNA sequence                                         |
| Les.204.1.S1_at       | L41126.1   | TC21759 | 2818 | 1329 | 1106 | 0.47 | 0.39 | ADP-glucose pyrophosphorylase small subunit                                                  |
| Les.2121.1.A1_at      | AY292201.1 | TC22352 | 1470 | 692  | 821  | 0.47 | 0.56 | defense-signaling glycopeptide hormone precursor                                             |
| Les.3630.1.S1_at      | U50985.1   | TC21720 | 82   | 39   | 58   | 0.47 | 0.71 | pectin esterase                                                                              |
| Les.3995.1.S1_at      | AW443014   | TC21771 | 2367 | 1111 | 548  | 0.47 | 0.23 | methionine rich arabinogalactan                                                              |
| LesAffx.32563.1.S1_at | AI778206   | TC22260 | 1389 | 652  | 895  | 0.47 | 0.64 | Transcribed locus, weakly similar to NP_001053075.1 [Oryza sativa (japonica cultivar-group)] |
| Les.5161.1.S1_at      | BT013412.1 | AI77756 | 262  | 123  | 126  | 0.47 | 0.48 | Lycopersicon esculentum clone 132049R, mRNA sequence                                         |
| Les.1988.1.A1_at      | BG630760   | BG62625 | 1761 | 824  | 736  | 0.47 | 0.42 | Transcribed locus                                                                            |
| Les.4794.1.S1_at      | BT014116.1 | TC23742 | 2619 | 1221 | 1093 | 0.47 | 0.42 | Lycopersicon esculentum clone 133221F, mRNA sequence                                         |
| Les.109.1.S1_at       | AF154424.1 | TC22392 | 2621 | 1221 | 1625 | 0.47 | 0.62 | TBG6 protein                                                                                 |
| Les.4707.1.S1_at      | BT012714.1 | TC23557 | 344  | 160  | 163  | 0.47 | 0.47 | Lycopersicon esculentum clone 113596R, mRNA sequence                                         |
| Les.2923.2.S1_at      | BI935057   | TC23094 | 2678 | 1245 | 1238 | 0.46 | 0.46 | Transcribed locus, weakly similar to NP_001044052.1 [Oryza sativa (japonica cultivar-group)] |
| Les.1603.1.A1_at      | BG630194   | TC23278 | 214  | 99   | 91   | 0.46 | 0.43 | Transcribed locus, weakly similar to NP_001043493.1 [Oryza sativa (japonica cultivar-group)] |
| Les.3034.1.S1_at      | BG631511   | TC22683 | 4169 | 1935 | 3335 | 0.46 | 0.8  | Lycopersicon esculentum clone 114419R, mRNA sequence                                         |
| Les.4696.1.S1_at      | BT014502.1 | TC22932 | 3043 | 1409 | 1421 | 0.46 | 0.47 | Lycopersicon esculentum clone 133876F, mRNA sequence                                         |
| LesAffx.47885.1.S1_at | CN384848   | TC23827 | 474  | 219  | 342  | 0.46 | 0.72 | Transcribed locus, weakly similar to XP_001121814.1 similar to CG9009-PA [Apis mellifera]    |

|                         |            |         |      |      |      |      |      |                                                                                                                                                                     |
|-------------------------|------------|---------|------|------|------|------|------|---------------------------------------------------------------------------------------------------------------------------------------------------------------------|
| LesAffx.67948.1.S1_s_at | BE458482   | TC22485 | 3995 | 1847 | 2284 | 0.46 | 0.57 | IAA6 protein                                                                                                                                                        |
| Les.1465.1.S1_at        | BG631822   | TC23566 | 1273 | 588  | 345  | 0.46 | 0.27 | Lycopersicon esculentum clone 132131F, mRNA sequence                                                                                                                |
| Les.33.1.S1_at          | AF148934.1 | TC22018 | 2400 | 1107 | 1610 | 0.46 | 0.67 | phantastica                                                                                                                                                         |
| Les.1557.1.A1_at        | BG626732   | TC24262 | 1307 | 603  | 712  | 0.46 | 0.55 | Transcribed locus                                                                                                                                                   |
| Les.5559.1.S1_at        | BT014147.1 | BE34444 | 714  | 329  | 448  | 0.46 | 0.63 | Lycopersicon esculentum clone 133266F, mRNA sequence                                                                                                                |
| Les.4089.1.S1_at        | BG642986   | TC22862 | 1304 | 600  | 816  | 0.46 | 0.63 | Transcribed locus                                                                                                                                                   |
| Les.4731.1.S1_at        | BT013577.1 | TC23297 | 3010 | 1383 | 3240 | 0.46 | 1.08 | Lycopersicon esculentum clone 132322R, mRNA sequence                                                                                                                |
| Les.1192.1.A1_at        | BG627061   | TC23222 | 999  | 459  | 737  | 0.46 | 0.74 | Transcribed locus                                                                                                                                                   |
| LesAffx.46085.1.S1_at   | AW928724   | TC22038 | 179  | 82   | 79   | 0.46 | 0.44 | Transcribed locus, weakly similar to XP_001114240.1 cytochrome P450, family 21, subfamily A, polypeptide 2 isoform 3 [Macaca mulatta]                               |
| Les.5791.1.S1_at        | BT014572.1 | TC22816 | 936  | 429  | 473  | 0.46 | 0.51 | Lycopersicon esculentum clone 134027R, mRNA sequence                                                                                                                |
| Les.4007.1.S1_at        | BG629658   | TC22991 | 3245 | 1486 | 1662 | 0.46 | 0.51 | 33 kDa oxygen-evolving protein                                                                                                                                      |
| LesAffx.41774.1.S1_at   | AW031192   | TC22848 | 1817 | 832  | 963  | 0.46 | 0.53 | Transcribed locus, weakly similar to NP_001045466.1 [Oryza sativa (japonica cultivar-group)]                                                                        |
| Les.5309.1.S1_at        | BT013691.1 | TC24062 | 610  | 279  | 498  | 0.46 | 0.82 | Lycopersicon esculentum clone 132529R, mRNA sequence                                                                                                                |
| LesAffx.71503.1.S1_at   | AW648310   | TC22254 | 1764 | 805  | 1529 | 0.46 | 0.87 | Transcribed locus, weakly similar to NP_001044300.1 [Oryza sativa (japonica cultivar-group)]                                                                        |
| Les.1654.1.A1_at        | BG627748   | TC23489 | 3560 | 1621 | 1753 | 0.46 | 0.49 | Transcribed locus, weakly similar to NP_001042315.1 [Oryza sativa (japonica cultivar-group)]                                                                        |
| LesAffx.53506.1.S1_at   | BI206456   | TC22555 | 383  | 174  | 415  | 0.45 | 1.08 | Transcribed locus, weakly similar to XP_001113078.1 similar to protein tyrosine phosphatase-like (proline instead of catalytic arginine), member b [Macaca mulatta] |
| Les.2474.2.A1_at        | BG735266   | TC23985 | 816  | 369  | 375  | 0.45 | 0.46 | Transcribed locus, weakly similar to XP_001108186.1 similar to 24-dehydrocholesterol reductase precursor [Macaca mulatta]                                           |
| Les.70.1.S1_at          | AF000141.1 | NP00014 | 1683 | 760  | 680  | 0.45 | 0.4  | class I knotted-like homeodomain protein                                                                                                                            |
| Les.3016.1.S1_at        | BT012757.1 | TC24030 | 1853 | 837  | 268  | 0.45 | 0.14 | Lycopersicon esculentum clone 113701F, mRNA sequence                                                                                                                |
| Les.5198.1.S1_at        | BT013491.1 |         | 311  | 140  | 124  | 0.45 | 0.4  | Lycopersicon esculentum clone 132175F, mRNA sequence                                                                                                                |
| LesAffx.71388.1.S1_at   | AW034384   | TC22565 | 375  | 168  | 285  | 0.45 | 0.76 | Transcribed locus, weakly similar to NP_001042342.1 [Oryza sativa (japonica cultivar-group)]                                                                        |
| LesAffx.24167.1.S1_at   | CK715596   | TC23845 | 108  | 48   | 87   | 0.45 | 0.81 | Transcribed locus                                                                                                                                                   |
| LesAffx.26471.2.S1_at   | AW218197   | TC22883 | 108  | 48   | 60   | 0.45 | 0.55 | Transcribed locus, weakly similar to NP_001054088.1 [Oryza sativa (japonica cultivar-group)]                                                                        |
| Les.4766.1.S1_at        | CN385384   | TC23006 | 1457 | 652  | 213  | 0.45 | 0.15 | Lycopersicon esculentum clone 133946F, mRNA sequence                                                                                                                |
| Les.1857.1.A1_at        | BG629691   | TC23786 | 91   | 41   | 61   | 0.45 | 0.67 | Transcribed locus, weakly similar to NP_001060003.1 [Oryza sativa (japonica cultivar-group)]                                                                        |
| Les.1959.1.A1_at        | BG630503   | TC23129 | 171  | 76   | 51   | 0.45 | 0.3  | Transcribed locus                                                                                                                                                   |

|                       |            |         |      |      |      |      |      |                                                                                                                 |
|-----------------------|------------|---------|------|------|------|------|------|-----------------------------------------------------------------------------------------------------------------|
| Les.2547.1.A1_at      | BG627349   | TC23877 | 299  | 133  | 205  | 0.45 | 0.69 | Transcribed locus, weakly similar to NP_001041979.1 [Oryza sativa (japonica cultivar-group)]                    |
| Les.3198.1.S1_at      | L13654.1   | TC22193 | 55   | 24   | 24   | 0.45 | 0.44 | Lycopersicon esculentum peroxidase (TPX1)                                                                       |
| Les.3303.1.S1_at      | BT012987.1 | TC23470 | 1889 | 840  | 1083 | 0.44 | 0.57 | Lycopersicon esculentum clone 114205R, mRNA sequence                                                            |
| Les.208.1.S1_at       | U44386.1   | TC22299 | 2359 | 1048 | 1277 | 0.44 | 0.54 | heat shock protein                                                                                              |
| Les.3297.1.S1_at      | BG630303   | TC21776 | 3104 | 1377 | 638  | 0.44 | 0.21 | Transcribed locus, weakly similar to NP_001043493.1 [Oryza sativa (japonica cultivar-group)]                    |
| Les.4718.1.S1_at      | BT013487.1 | BI92390 | 181  | 80   | 199  | 0.44 | 1.1  | Lycopersicon esculentum clone 132171F, mRNA sequence                                                            |
| Les.3322.3.S1_at      | AW443800   | BP90402 | 781  | 344  | 174  | 0.44 | 0.22 | Transcribed locus, moderately similar to NP_001047599.1 [Oryza sativa (japonica cultivar-group)]                |
| Les.4962.1.S1_at      | BI204454   | TC22450 | 1416 | 623  | 1003 | 0.44 | 0.71 | Lycopersicon esculentum clone 114228R, mRNA sequence                                                            |
| Les.1108.1.A1_at      | BG629434   | TC22374 | 350  | 154  | 137  | 0.44 | 0.39 | Transcribed locus, weakly similar to NP_001042402.1 [Oryza sativa (japonica cultivar-group)]                    |
| Les.256.1.S1_s_at     | AF022017.1 | TC22485 | 3008 | 1322 | 1637 | 0.44 | 0.54 | IAA6 protein                                                                                                    |
| LesAffx.26471.3.A1_at | AW218200   | TC22883 | 578  | 254  | 326  | 0.44 | 0.56 | Transcribed locus, weakly similar to NP_001054088.1 [Oryza sativa (japonica cultivar-group)]                    |
| Les.4334.3.A1_at      | BG735063   | TC22597 | 238  | 104  | 100  | 0.44 | 0.42 | Transcribed locus, weakly similar to XP_001109838.1 ribulose-5-phosphate-3-epimerase isoform 5 [Macaca mulatta] |
| Les.4277.1.A1_at      | BG628255   | TC24221 | 3215 | 1408 | 1665 | 0.44 | 0.52 | Transcribed locus, moderately similar to NP_001048891.1 [Oryza sativa (japonica cultivar-group)]                |
| Les.5865.1.S1_at      | BT013275.1 | TC23540 | 2209 | 966  | 3530 | 0.44 | 1.6  | Lycopersicon esculentum clone 134853R, mRNA sequence                                                            |
| Les.4703.1.S1_at      | BT012803.1 | TC23339 | 4704 | 2050 | 1964 | 0.44 | 0.42 | Lycopersicon esculentum clone 113819F, mRNA sequence                                                            |
| LesAffx.10497.2.S1_at | AI897776   | TC24435 | 393  | 171  | 158  | 0.43 | 0.4  | Transcribed locus, weakly similar to NP_001042618.1 [Oryza sativa (japonica cultivar-group)]                    |
| Les.5952.1.S1_at      | AY568716.1 | TC22867 | 1531 | 664  | 531  | 0.43 | 0.35 | acyl carrier protein                                                                                            |
| Les.4405.1.A1_at      | BG630861   | TC24428 | 1457 | 630  | 337  | 0.43 | 0.23 | Transcribed locus, moderately similar to NP_001047599.1 [Oryza sativa (japonica cultivar-group)]                |
| LesAffx.70270.1.S1_at | AI773931   | TC23665 | 4305 | 1858 | 2320 | 0.43 | 0.54 | Transcribed locus, moderately similar to NP_001046164.1 [Oryza sativa (japonica cultivar-group)]                |
| LesAffx.9367.1.S1_at  | CN385420   | TC22317 | 638  | 275  | 170  | 0.43 | 0.27 | Transcribed locus, weakly similar to NP_001049918.1 [Oryza sativa (japonica cultivar-group)]                    |
| LesAffx.10091.1.S1_at | AI487223   | TC23911 | 156  | 67   | 41   | 0.43 | 0.26 | Transcribed locus, weakly similar to NP_173851.1 [Arabidopsis thaliana]                                         |
| Les.2659.2.A1_at      | BG626591   | TC23900 | 312  | 133  | 210  | 0.43 | 0.67 | Transcribed locus, weakly similar to NP_001053382.1 [Oryza sativa (japonica cultivar-group)]                    |
| LesAffx.10650.1.S1_at | AW036686   | TC23252 | 1610 | 683  | 314  | 0.42 | 0.2  | CDNA, clone: FC20BC08, HTC in fruit                                                                             |
| LesAffx.3572.1.S1_at  | CK715858   | DV10479 | 1723 | 731  | 829  | 0.42 | 0.48 | ---                                                                                                             |

|                       |            |         |      |      |      |      |      |                                                                                                            |
|-----------------------|------------|---------|------|------|------|------|------|------------------------------------------------------------------------------------------------------------|
| LesAffx.53474.1.S1_at | BG133264   | TC22918 | 1539 | 652  | 620  | 0.42 | 0.4  | Transcribed locus, weakly similar to NP_001042043.1 [Oryza sativa (japonica cultivar-group)]               |
| Les.4277.3.S1_at      | BG643121   | TC24221 | 2649 | 1121 | 1322 | 0.42 | 0.5  | Transcribed locus, moderately similar to NP_001048891.1 [Oryza sativa (japonica cultivar-group)]           |
| LesAffx.5088.1.S1_at  | BI206366   | BI20636 | 45   | 19   | 24   | 0.42 | 0.53 | ---                                                                                                        |
| Les.1871.2.A1_at      | BG629735   | TC21764 | 1823 | 770  | 1403 | 0.42 | 0.77 | Transcribed locus, weakly similar to NP_001044653.1 [Oryza sativa (japonica cultivar-group)]               |
| Les.2092.2.S1_at      | BI203427   | BG63176 | 1563 | 659  | 1151 | 0.42 | 0.74 | Transcribed locus, weakly similar to XP_001111095.1 aldolase B isoform 5 [Macaca mulatta]                  |
| LesAffx.29797.1.S1_at | AJ784483   | TC23412 | 1762 | 743  | 154  | 0.42 | 0.09 | Transcribed locus, weakly similar to NP_001042863.1 [Oryza sativa (japonica cultivar-group)]               |
| LesAffx.56.6.S1_at    | BM536076   | TC23980 | 150  | 63   | 169  | 0.42 | 1.13 | Transcribed locus, weakly similar to NP_004311.1 Ca++ transporting, fast twitch 1 isoform b [Homo sapiens] |
| Les.3409.1.A1_at      | BG735108   | GO37597 | 3684 | 1549 | 1014 | 0.42 | 0.28 | Transcribed locus, weakly similar to NP_001044764.1 [Oryza sativa (japonica cultivar-group)]               |
| Les.119.1.S1_at       | AF218774.1 | TC21978 | 1243 | 521  | 483  | 0.42 | 0.39 | Aqp2 protein                                                                                               |
| Les.3595.1.S1_at      | L76632.1   | TC21885 | 3432 | 1438 | 2086 | 0.42 | 0.61 | osmotin-like protein                                                                                       |
| Les.1549.1.A1_at      | BG626692   | TC23631 | 864  | 362  | 579  | 0.42 | 0.67 | Transcribed locus                                                                                          |
| Les.4008.1.S1_a_at    | BG630151   | TC21741 | 4135 | 1730 | 2005 | 0.42 | 0.48 | xyloglucan endotransglycosylase/hydrolase 16 protein                                                       |
| Les.1179.1.A1_at      | BG629888   | TC24291 | 461  | 193  | 336  | 0.42 | 0.73 | Transcribed locus                                                                                          |
| Les.1821.1.A1_at      | BG629348   | BG62934 | 342  | 143  | 132  | 0.42 | 0.39 | Transcribed locus                                                                                          |
| Les.3312.2.S1_at      | BI932707   | TC21843 | 2541 | 1054 | 1238 | 0.41 | 0.49 | Transcribed locus, weakly similar to NP_001043993.1 [Oryza sativa (japonica cultivar-group)]               |
| Les.5327.1.S1_at      | BT013719.1 | TC24178 | 931  | 384  | 356  | 0.41 | 0.38 | Lycopersicon esculentum clone 132567F, mRNA sequence                                                       |
| LesAffx.3570.4.S1_at  | AW624180   | TC22612 | 1017 | 418  | 498  | 0.41 | 0.49 | Ribosomal protein L2                                                                                       |
| LesAffx.61000.1.S1_at | BM410987   | TC23050 | 850  | 349  | 372  | 0.41 | 0.44 | Transcribed locus, weakly similar to NP_001045184.1 [Oryza sativa (japonica cultivar-group)]               |
| Les.3064.1.S1_at      | U81033.1   | TC21721 | 2277 | 934  | 812  | 0.41 | 0.36 | ADP-glucose pyrophosphorylase large subunit                                                                |
| LesAffx.6110.1.S1_at  | BF098450   | TC22721 | 79   | 32   | 49   | 0.41 | 0.62 | ---                                                                                                        |
| LesAffx.26471.3.S1_at | AW218200   | TC22883 | 2567 | 1048 | 1456 | 0.41 | 0.57 | Transcribed locus, weakly similar to NP_001054088.1 [Oryza sativa (japonica cultivar-group)]               |
| Les.1951.1.A1_at      | BG630440   | TC23845 | 4344 | 1772 | 2057 | 0.41 | 0.47 | Transcribed locus, weakly similar to NP_188563.1 binding [Arabidopsis thaliana]                            |
| LesAffx.9007.1.S1_at  | CN385923   | GO37540 | 1257 | 512  | 1147 | 0.41 | 0.91 | Transcribed locus, weakly similar to NP_001042158.1 [Oryza sativa (japonica cultivar-group)]               |
| Les.1871.1.S1_at      | CN385866   | TC21764 | 2611 | 1060 | 2116 | 0.41 | 0.81 | Transcribed locus, weakly similar to NP_001044653.1 [Oryza sativa (japonica cultivar-group)]               |



|                       |            |         |      |      |      |      |      |                                                                                                                 |
|-----------------------|------------|---------|------|------|------|------|------|-----------------------------------------------------------------------------------------------------------------|
| Les.2092.1.S1_at      | BG626759   | TC22657 | 3052 | 1238 | 2521 | 0.41 | 0.83 | Transcribed locus, weakly similar to XP_001111095.1 aldolase B isoform 5 [Macaca mulatta]                       |
| Les.174.1.A1_at       | BG627544   | TC24015 | 289  | 117  | 42   | 0.41 | 0.15 | Transcribed locus, moderately similar to NP_001045188.1 [Oryza sativa (japonica cultivar-group)]                |
| LesAffx.24799.2.A1_at | BI209670   | TC24255 | 404  | 163  | 146  | 0.4  | 0.36 | Transcribed locus, weakly similar to NP_001045764.1 [Oryza sativa (japonica cultivar-group)]                    |
| Les.4835.1.S1_at      | BT012722.1 | TC24498 | 451  | 182  | 174  | 0.4  | 0.39 | Lycopersicon esculentum clone 113649F, mRNA sequence                                                            |
| Les.4896.1.S1_at      | BT012857.1 | TC23109 | 2174 | 875  | 916  | 0.4  | 0.42 | Lycopersicon esculentum clone 113944R, mRNA sequence                                                            |
| Les.5263.1.S1_at      | BT013600.1 | TC22756 | 223  | 90   | 107  | 0.4  | 0.48 | Lycopersicon esculentum clone 132364F, mRNA sequence                                                            |
| Les.4277.2.S1_at      | AW623709   | TC21859 | 2273 | 912  | 1088 | 0.4  | 0.48 | Transcribed locus, moderately similar to NP_001048891.1 [Oryza sativa (japonica cultivar-group)]                |
| Les.24.1.S1_at        | AF191823.1 | TC21735 | 474  | 190  | 73   | 0.4  | 0.15 | alpha-galactosidase                                                                                             |
| Les.3372.1.S1_at      | BG631141   | TC23249 | 1332 | 533  | 595  | 0.4  | 0.45 | Lycopersicon esculentum clone 132813R, mRNA sequence                                                            |
| LesAffx.41816.1.S1_at | AW649474   | TC22094 | 284  | 114  | 147  | 0.4  | 0.52 | Transcribed locus, weakly similar to XP_001102886.1 hexosaminidase B isoform 1 [Macaca mulatta]                 |
| Les.1205.2.S1_at      | BM536081   | TC21911 | 805  | 321  | 93   | 0.4  | 0.12 | Transcribed locus, weakly similar to NP_001059455.1 [Oryza sativa (japonica cultivar-group)]                    |
| LesAffx.37636.1.S1_at | CN384813   | EG55389 | 90   | 36   | 39   | 0.4  | 0.44 | ---                                                                                                             |
| Les.3094.3.S1_at      | BG125458   | TC23596 | 3360 | 1337 | 991  | 0.4  | 0.29 | Transcribed locus, weakly similar to NP_001041542.1 P450, family 51, subfamily A, polypeptide 1 [Gallus gallus] |
| Les.3330.3.A1_at      | BG629064   | TC24355 | 2943 | 1169 | 1032 | 0.4  | 0.35 | Transcribed locus, weakly similar to NP_001044764.1 [Oryza sativa (japonica cultivar-group)]                    |
| Les.1871.2.A1_a_at    | BG629735   | TC21764 | 952  | 378  | 616  | 0.4  | 0.65 | Transcribed locus, weakly similar to NP_001044653.1 [Oryza sativa (japonica cultivar-group)]                    |
| Les.3701.1.S1_at      | AF022022.1 | TC24440 | 69   | 27   | 49   | 0.4  | 0.7  | IAA11 protein                                                                                                   |
| Les.4312.2.S1_at      | BG626083   | TC22795 | 6555 | 2588 | 741  | 0.39 | 0.11 | CDNA, clone: FC02DB04, HTC in fruit                                                                             |
| LesAffx.770.1.S1_at   | BI210904   | BI21090 | 239  | 94   | 156  | 0.39 | 0.65 | ---                                                                                                             |
| Les.4738.1.S1_at      | BT013480.1 | GO37558 | 1878 | 737  | 1199 | 0.39 | 0.64 | Lycopersicon esculentum clone 132163F, mRNA sequence                                                            |
| LesAffx.24799.2.S1_at | BI209670   | TC24255 | 986  | 386  | 346  | 0.39 | 0.35 | Transcribed locus, weakly similar to NP_001045764.1 [Oryza sativa (japonica cultivar-group)]                    |
| Les.4334.1.A1_at      | BG626518   | TC24039 | 2115 | 828  | 895  | 0.39 | 0.42 | Transcribed locus, weakly similar to XP_001109838.1 ribulose-5-phosphate-3-epimerase isoform 5 [Macaca mulatta] |
| LesAffx.54718.1.S1_at | BM411779   | TC22617 | 644  | 252  | 216  | 0.39 | 0.33 | Transcribed locus, moderately similar to NP_001044227.1 [Oryza sativa (japonica cultivar-group)]                |
| LesAffx.62334.1.S1_at | AW647879   | AW64787 | 38   | 15   | 12   | 0.39 | 0.33 | ---                                                                                                             |

|                       |            |         |      |      |      |      |      |                                                                                                                               |
|-----------------------|------------|---------|------|------|------|------|------|-------------------------------------------------------------------------------------------------------------------------------|
| LesAffx.65028.1.S1_at | BG128587   | TC22082 | 3341 | 1298 | 1290 | 0.39 | 0.39 | Transcribed locus, weakly similar to NP_001054271.1 [Oryza sativa (japonica cultivar-group)]                                  |
| Les.3322.1.S1_at      | BI935557   | TC22083 | 525  | 204  | 112  | 0.39 | 0.21 | Transcribed locus, moderately similar to NP_001047599.1 [Oryza sativa (japonica cultivar-group)]                              |
| Les.4008.1.S1_at      | BG630151   | TC21741 | 2619 | 1015 | 1220 | 0.39 | 0.47 | xyloglucan endotransglycosylase/hydrolase 16 protein                                                                          |
| LesAffx.46550.1.S1_at | BG134870   | BG13487 | 155  | 59   | 72   | 0.38 | 0.46 | ---                                                                                                                           |
| Les.4008.2.S1_at      | BG643663   | TC21741 | 2263 | 867  | 1039 | 0.38 | 0.46 | xyloglucan endotransglycosylase/hydrolase 16 protein                                                                          |
| LesAffx.48215.1.S1_at | AW945008   | TC23968 | 1835 | 703  | 1102 | 0.38 | 0.6  | Transcribed locus, weakly similar to NP_001043647.1 [Oryza sativa (japonica cultivar-group)]                                  |
| Les.5312.1.S1_at      | BT013697.1 | TC22735 | 2597 | 991  | 656  | 0.38 | 0.25 | Lycopersicon esculentum clone 132539F, mRNA sequence                                                                          |
| LesAffx.24096.1.S1_at | AJ785329   | TC23598 | 345  | 131  | 158  | 0.38 | 0.46 | ---                                                                                                                           |
| Les.4334.2.S1_at      | BI928683   | TC22597 | 1421 | 539  | 570  | 0.38 | 0.4  | Transcribed locus, weakly similar to XP_001109838.1 ribulose-5-phosphate-3-epimerase isoform 5 [Macaca mulatta]               |
| Les.3055.1.S1_at      | AJ002590.1 | TC21769 | 375  | 142  | 183  | 0.38 | 0.49 | CycD3;3 protein                                                                                                               |
| LesAffx.30807.1.S1_at | AW624957   | AW62495 | 1784 | 668  | 638  | 0.37 | 0.36 | Transcribed locus, weakly similar to XP_001116629.1 similar to fatty acid desaturase 2 isoform 2 [Macaca mulatta]             |
| Les.4444.1.S1_s_at    | BI207010   | TC22444 | 190  | 71   | 75   | 0.37 | 0.4  | CycD3;3 protein                                                                                                               |
| Les.1205.3.S1_at      | BM410805   | TC21911 | 1376 | 508  | 149  | 0.37 | 0.11 | Transcribed locus, weakly similar to NP_001059455.1 [Oryza sativa (japonica cultivar-group)]                                  |
| Les.1197.2.A1_at      | BG630003   | TC23124 | 2356 | 867  | 1007 | 0.37 | 0.43 | Transcribed locus, weakly similar to XP_001090911.1 LanC lantibiotic synthetase component C-like 2 isoform 2 [Macaca mulatta] |
| Les.1197.1.S1_at      | BI925087   | TC22471 | 550  | 201  | 213  | 0.37 | 0.39 | Transcribed locus, weakly similar to XP_001090911.1 LanC lantibiotic synthetase component C-like 2 isoform 2 [Macaca mulatta] |
| LesAffx.24799.1.S1_at | CK715756   | TC23394 | 612  | 224  | 202  | 0.37 | 0.33 | Transcribed locus, weakly similar to NP_001045764.1 [Oryza sativa (japonica cultivar-group)]                                  |
| LesAffx.44609.1.S1_at | BG631285   | TC23469 | 1162 | 423  | 804  | 0.36 | 0.69 | Transcribed locus, weakly similar to NP_187615.2 factor [Arabidopsis thaliana]                                                |
| LesAffx.56547.2.S1_at | BI207815   | TC22569 | 254  | 92   | 159  | 0.36 | 0.62 | Transcribed locus, weakly similar to NP_001042475.1 [Oryza sativa (japonica cultivar-group)]                                  |
| Les.5579.1.S1_at      | BT014190.1 | TC23962 | 769  | 278  | 241  | 0.36 | 0.31 | Lycopersicon esculentum clone 133367R, mRNA sequence                                                                          |
| LesAffx.105.1.S1_at   | CK715483   | TC22543 | 185  | 66   | 136  | 0.36 | 0.74 | Transcribed locus, weakly similar to NP_001052215.1 [Oryza sativa (japonica cultivar-group)]                                  |
| LesAffx.17924.1.S1_at | BG124217   | TC24101 | 1449 | 514  | 535  | 0.36 | 0.37 | Transcribed locus, weakly similar to NP_001049241.1 [Oryza sativa (japonica cultivar-group)]                                  |
| Les.3330.1.S1_at      | AW650121   | TC24355 | 1469 | 521  | 512  | 0.35 | 0.35 | Transcribed locus, weakly similar to NP_001044764.1 [Oryza sativa (japonica cultivar-group)]                                  |
| Les.4473.1.S1_at      | AJ606077.1 | TC22116 | 1478 | 524  | 780  | 0.35 | 0.53 | spe4 protein                                                                                                                  |

|                       |            |         |      |      |      |      |      |                                                                                              |
|-----------------------|------------|---------|------|------|------|------|------|----------------------------------------------------------------------------------------------|
| Les.1808.1.A1_at      | BG629204   |         | 9    | 3    | 7    | 0.35 | 0.72 | Transcribed locus                                                                            |
| Les.369.1.S1_at       | AF059489.1 | TC21922 | 4053 | 1421 | 1975 | 0.35 | 0.49 | expansin                                                                                     |
| LesAffx.14321.1.S1_at | AW737808   | AW73780 | 110  | 39   | 43   | 0.35 | 0.39 | ---                                                                                          |
| Les.6.1.S1_at         | AF261141.1 | TC22389 | 1804 | 625  | 337  | 0.35 | 0.19 | hypothetical LOC543656                                                                       |
| LesAffx.26471.1.S1_at | BG126065   | TC22883 | 1932 | 668  | 972  | 0.35 | 0.5  | Transcribed locus, weakly similar to NP_001054088.1 [Oryza sativa (japonica cultivar-group)] |
| Les.4987.1.S1_at      | BT013055.1 | TC23511 | 2295 | 791  | 1406 | 0.34 | 0.61 | Lycopersicon esculentum clone 114311F, mRNA sequence                                         |
| Les.876.1.A1_at       | BG627344   | TC22377 | 218  | 75   | 77   | 0.34 | 0.35 | Transcribed locus, weakly similar to NP_001051973.1 [Oryza sativa (japonica cultivar-group)] |
| Les.852.1.A1_at       | BG627744   | TC24030 | 56   | 19   | 17   | 0.34 | 0.3  | Transcribed locus                                                                            |
| Les.4749.1.S1_at      | BT013546.1 | AI77484 | 1052 | 357  | 371  | 0.34 | 0.35 | Lycopersicon esculentum clone 132267F, mRNA sequence                                         |
| Les.3409.2.S1_at      | BF050508   | TC21920 | 1957 | 664  | 470  | 0.34 | 0.24 | Transcribed locus, weakly similar to NP_001044764.1 [Oryza sativa (japonica cultivar-group)] |
| Les.3065.2.A1_at      | BG630869   | TC22543 | 1472 | 495  | 202  | 0.34 | 0.14 | Transcribed locus, weakly similar to NP_001042793.1 [Oryza sativa (japonica cultivar-group)] |
| Les.4549.1.S1_at      | BT013085.1 | TC24365 | 152  | 51   | 53   | 0.34 | 0.35 | Lycopersicon esculentum clone 114349R, mRNA sequence                                         |
| LesAffx.33890.1.S1_at | BG134582   | TC22584 | 160  | 54   | 44   | 0.33 | 0.27 | Transcribed locus, weakly similar to NP_001067602.1 [Oryza sativa (japonica cultivar-group)] |
| Les.3330.2.S1_at      | BE458823   | TC24355 | 2809 | 939  | 922  | 0.33 | 0.33 | Transcribed locus, weakly similar to NP_001044764.1 [Oryza sativa (japonica cultivar-group)] |
| LesAffx.67767.1.A1_at | AI486022   | TC22922 | 254  | 85   | 271  | 0.33 | 1.07 | Transcribed locus, weakly similar to NP_568700.1 protein [Arabidopsis thaliana]              |
| Les.4938.1.S1_at      | BT012940.1 | TC22310 | 134  | 45   | 47   | 0.33 | 0.35 | Lycopersicon esculentum clone 114108R, mRNA sequence                                         |
| Les.3792.1.S1_s_at    | AF249329.1 | GO37419 | 707  | 234  | 126  | 0.33 | 0.18 | Lycopersicon esculentum putative cytochrome P450                                             |
| Les.479.1.S1_at       | AY509122.1 | TC22844 | 418  | 138  | 156  | 0.33 | 0.37 | arachidonic acid-induced DEA1                                                                |
| LesAffx.9038.1.S1_at  | BI930643   | TC22956 | 345  | 113  | 165  | 0.33 | 0.48 | Transcribed locus, weakly similar to NP_001042297.1 [Oryza sativa (japonica cultivar-group)] |
| LesAffx.41518.1.S1_at | AW930080   | TC23094 | 461  | 151  | 177  | 0.33 | 0.39 | Transcribed locus, weakly similar to NP_001050851.1 [Oryza sativa (japonica cultivar-group)] |
| LesAffx.37344.1.S1_at | AI897449   | TC21881 | 472  | 154  | 103  | 0.33 | 0.22 | Transcribed locus, weakly similar to NP_001042390.1 [Oryza sativa (japonica cultivar-group)] |
| LesAffx.48876.1.S1_at | AW622727   | AW62272 | 97   | 32   | 76   | 0.32 | 0.78 | ---                                                                                          |
| Les.5832.1.S1_at      | BT014414.1 | TC22401 | 1538 | 494  | 287  | 0.32 | 0.19 | Lycopersicon esculentum clone 133722R, mRNA sequence                                         |
| Les.4529.1.S1_at      | AY497478.1 | TC21903 | 542  | 174  | 100  | 0.32 | 0.18 | xyloglucan endotransglucosylase-hydrolase XTH7                                               |
| LesAffx.16472.1.S1_at | AI774397   | TC24204 | 424  | 135  | 192  | 0.32 | 0.45 | ---                                                                                          |
| Les.2626.1.S1_at      | BG735008   | TC22245 | 2277 | 725  | 651  | 0.32 | 0.29 | Lycopersicon esculentum clone 132901F, mRNA sequence                                         |
| Les.5850.1.S1_at      | BT014189.1 | TC21894 | 526  | 167  | 325  | 0.32 | 0.62 | Lycopersicon esculentum clone 133366R, mRNA sequence                                         |

|                       |            |         |      |      |      |      |      |                                                                                              |
|-----------------------|------------|---------|------|------|------|------|------|----------------------------------------------------------------------------------------------|
| Les.4493.3.S1_at      | CN385077   | TC23105 | 595  | 189  | 197  | 0.32 | 0.33 | ADP/ATP translocator                                                                         |
| Les.1042.1.A1_at      | BG629025   | TC22972 | 280  | 89   | 302  | 0.32 | 1.08 | Transcribed locus, weakly similar to NP_001042141.1 [Oryza sativa (japonica cultivar-group)] |
| Les.642.1.S1_at       | BG626672   | BG62667 | 229  | 72   | 59   | 0.32 | 0.26 | Lycopersicon esculentum clone 132200F, mRNA sequence                                         |
| LesAffx.41330.1.A1_at | CK574967   | TC24064 | 366  | 115  | 120  | 0.31 | 0.33 | Transcribed locus, weakly similar to NP_001067668.1 [Oryza sativa (japonica cultivar-group)] |
| Les.2529.1.A1_at      | BG631274   | TC24469 | 1575 | 489  | 971  | 0.31 | 0.62 | Transcribed locus, weakly similar to NP_001041768.1 [Oryza sativa (japonica cultivar-group)] |
| Les.10.1.S1_at        | AB010991.1 | TC21912 | 299  | 92   | 117  | 0.31 | 0.39 | 3b-hydroxylase                                                                               |
| Les.1205.1.A1_at      | BG630057   | TC21911 | 926  | 283  | 107  | 0.31 | 0.12 | Transcribed locus, weakly similar to NP_001059455.1 [Oryza sativa (japonica cultivar-group)] |
| Les.2529.2.S1_at      | BI421300   | TC22334 | 823  | 250  | 537  | 0.3  | 0.65 | Transcribed locus, weakly similar to NP_001041768.1 [Oryza sativa (japonica cultivar-group)] |
| LesAffx.10497.2.A1_at | AI897776   | TC24435 | 2587 | 785  | 710  | 0.3  | 0.27 | Transcribed locus, weakly similar to NP_001042618.1 [Oryza sativa (japonica cultivar-group)] |
| Les.3065.1.S1_at      | BI929558   | TC22543 | 965  | 289  | 140  | 0.3  | 0.15 | Transcribed locus, weakly similar to NP_001042793.1 [Oryza sativa (japonica cultivar-group)] |
| Les.1562.1.S1_at      | BG629310   | TC23006 | 502  | 150  | 158  | 0.3  | 0.32 | Lycopersicon esculentum clone 133516F, mRNA sequence                                         |
| Les.4065.1.A1_at      | L24019.1   |         | 42   | 12   | 14   | 0.3  | 0.33 | Lycopersicon esculentum (DB166) meloidogyne-induced giant cell protein mRNA, 3' end          |
| LesAffx.41330.2.S1_at | AI899559   | TC24064 | 548  | 162  | 174  | 0.3  | 0.32 | Transcribed locus, weakly similar to NP_001067668.1 [Oryza sativa (japonica cultivar-group)] |
| LesAffx.4617.1.A1_at  | BG735509   | TC23088 | 874  | 258  | 220  | 0.3  | 0.25 | Transcribed locus, weakly similar to NP_001041735.1 [Oryza sativa (japonica cultivar-group)] |
| Les.68.2.S1_a_at      | BT013727.1 | TC21796 | 3596 | 1063 | 828  | 0.3  | 0.23 | endo-beta-1,4-D-glucanase                                                                    |
| Les.3017.3.S1_at      | BE462343   | TC21898 | 994  | 293  | 476  | 0.29 | 0.48 | Transcribed locus, weakly similar to XP_001084411.1 aquaporin 1 [Macaca mulatta]             |
| Les.3017.1.A1_at      | BG629826   | AI78132 | 1583 | 463  | 806  | 0.29 | 0.51 | Transcribed locus, weakly similar to XP_001084411.1 aquaporin 1 [Macaca mulatta]             |
| Les.3636.1.S1_at      | Y11268.1   | TC23558 | 372  | 108  | 268  | 0.29 | 0.72 | endo-1,4-beta-D-glucanase                                                                    |
| LesAffx.61034.1.S1_at | BG643132   | TC21983 | 2125 | 619  | 1062 | 0.29 | 0.5  | Transcribed locus, weakly similar to NP_001043558.1 [Oryza sativa (japonica cultivar-group)] |
| LesAffx.71035.1.S1_at | BI207404   | TC23510 | 1293 | 376  | 448  | 0.29 | 0.35 | Transcribed locus, weakly similar to NP_179716.1 protein [Arabidopsis thaliana]              |
| LesAffx.4981.1.S1_at  | AW623022   | TC22429 | 5373 | 1556 | 1114 | 0.29 | 0.21 | Transcribed locus, weakly similar to NP_001041979.1 [Oryza sativa (japonica cultivar-group)] |
| Les.5918.1.S1_at      | AY224079.1 | TC21718 | 116  | 34   | 33   | 0.29 | 0.29 | ferric-chelate reductase                                                                     |
| Les.2325.1.S1_at      | BG625896   | TC22401 | 336  | 97   | 93   | 0.29 | 0.28 | yfe37 protein                                                                                |
| LesAffx.67767.1.S1_at | BF096648   | TC22922 | 466  | 134  | 579  | 0.29 | 1.24 | Transcribed locus, weakly similar to NP_568700.1 protein [Arabidopsis thaliana]              |

|                       |            |         |      |     |      |      |      |                                                                                                                               |
|-----------------------|------------|---------|------|-----|------|------|------|-------------------------------------------------------------------------------------------------------------------------------|
| Les.2688.1.S1_at      | AJ560646.1 | TC21917 | 561  | 159 | 192  | 0.28 | 0.34 | expansin11                                                                                                                    |
| LesAffx.46815.1.S1_at | BI934723   | TC21911 | 669  | 186 | 169  | 0.28 | 0.25 | Hypothetical LOC544002                                                                                                        |
| LesAffx.58019.1.S1_at | BI929233   | TC22171 | 575  | 159 | 429  | 0.28 | 0.75 | Transcribed locus, weakly similar to NP_001052012.1 [Oryza sativa (japonica cultivar-group)]                                  |
| LesAffx.37344.2.S1_at | BG131634   | TC21881 | 920  | 245 | 157  | 0.27 | 0.17 | Transcribed locus, weakly similar to NP_001042390.1 [Oryza sativa (japonica cultivar-group)]                                  |
| LesAffx.65984.1.S1_at | BG125327   | GO37430 | 2532 | 675 | 176  | 0.27 | 0.07 | Transcribed locus, weakly similar to NP_001044052.1 [Oryza sativa (japonica cultivar-group)]                                  |
| LesAffx.71006.1.S1_at | BI203873   | TC22346 | 31   | 8   | 9    | 0.26 | 0.28 | Transcribed locus, weakly similar to NP_001043243.1 [Oryza sativa (japonica cultivar-group)]                                  |
| LesAffx.46815.2.S1_at | BI929852   | TC22829 | 2008 | 528 | 491  | 0.26 | 0.24 | Hypothetical LOC544002                                                                                                        |
| Les.4594.1.S1_at      | BT012739.1 | TC23704 | 3408 | 893 | 1824 | 0.26 | 0.54 | Lycopersicon esculentum clone 113677R, mRNA sequence                                                                          |
| Les.406.1.A1_at       | BG629308   | TC24082 | 891  | 233 | 317  | 0.26 | 0.36 | Transcribed locus, weakly similar to NP_196850.1 binding [Arabidopsis thaliana]                                               |
| Les.1320.1.A1_at      | BG630795   | BG63079 | 45   | 11  | 11   | 0.25 | 0.24 | Transcribed locus                                                                                                             |
| Les.5941.1.A1_at      | CK715706   | TC22893 | 2580 | 642 | 1747 | 0.25 | 0.68 | Transcribed locus, weakly similar to NP_001042315.1 [Oryza sativa (japonica cultivar-group)]                                  |
| LesAffx.64757.1.A1_at | AI490042   | TC22570 | 547  | 135 | 249  | 0.25 | 0.45 | Transcribed locus                                                                                                             |
| LesAffx.64757.1.S1_at | AI490042   | TC22570 | 999  | 245 | 432  | 0.25 | 0.43 | Transcribed locus                                                                                                             |
| LesAffx.13252.2.A1_at | BG124820   | TC22202 | 356  | 77  | 65   | 0.22 | 0.18 | Transcribed locus, weakly similar to NP_001042395.1 [Oryza sativa (japonica cultivar-group)]                                  |
| Les.3069.1.S1_at      | BG630752   | TC21938 | 1004 | 214 | 555  | 0.21 | 0.55 | Lycopersicon esculentum clone 132988F, mRNA sequence                                                                          |
| LesAffx.23349.1.S1_at | AI782014   | TC21920 | 2010 | 423 | 2066 | 0.21 | 1.03 | ADP/ATP translocator                                                                                                          |
| Les.360.1.S1_at       | M86724.1   | TC23986 | 2155 | 449 | 1480 | 0.21 | 0.69 | alcohol dehydrogenase                                                                                                         |
| Les.1714.1.A1_at      | BG628281   | TC24400 | 677  | 140 | 505  | 0.21 | 0.75 | Transcribed locus                                                                                                             |
| Les.3733.1.S1_at      | AF096776.1 | TC21836 | 2244 | 457 | 146  | 0.2  | 0.06 | expansin                                                                                                                      |
| Les.9.1.S1_at         | AB010992.1 | TC22813 | 4788 | 968 | 704  | 0.2  | 0.15 | 3b-hydroxylase                                                                                                                |
| LesAffx.56.4.S1_at    | BG128707   | TC22262 | 219  | 44  | 53   | 0.2  | 0.24 | Transcribed locus, weakly similar to XP_001087943.1 similar to carboxypeptidase, vitellogenic-like isoform 4 [Macaca mulatta] |
| Les.1614.1.A1_at      | BG628742   | TC23793 | 432  | 86  | 192  | 0.2  | 0.45 | Transcribed locus, moderately similar to NP_001049792.1 [Oryza sativa (japonica cultivar-group)]                              |
| LesAffx.13252.1.S1_at | BI929109   | TC22202 | 2304 | 431 | 403  | 0.19 | 0.18 | Transcribed locus, weakly similar to NP_001042395.1 [Oryza sativa (japonica cultivar-group)]                                  |
| Les.4397.2.A1_at      | AW218741   | TC23761 | 1155 | 213 | 357  | 0.18 | 0.31 | CDNA, clone: FC25AG12, HTC in fruit                                                                                           |
| Les.4397.1.S1_at      | BG127578   | TC23761 | 478  | 85  | 147  | 0.18 | 0.31 | CDNA, clone: FC25AG12, HTC in fruit                                                                                           |
| Les.5664.1.S1_at      | BT014348.1 | AW03195 | 848  | 148 | 437  | 0.17 | 0.51 | Lycopersicon esculentum clone 133623F, mRNA sequence                                                                          |
| Les.263.1.S1_at       | M98466.1   | TC21722 | 2396 | 412 | 629  | 0.17 | 0.26 | polygalacturonase isoenzyme 1 beta subunit                                                                                    |

|                       |            |         |      |     |     |      |      |                                                                                                                                 |
|-----------------------|------------|---------|------|-----|-----|------|------|---------------------------------------------------------------------------------------------------------------------------------|
| LesAffx.13252.2.S1_at | BG124820   | TC22202 | 1590 | 237 | 242 | 0.15 | 0.15 | Transcribed locus, weakly similar to NP_001042395.1 [Oryza sativa (japonica cultivar-group)]                                    |
| LesAffx.53591.1.S1_at | AI899018   | TC22292 | 390  | 55  | 33  | 0.14 | 0.08 | Transcribed locus, weakly similar to XP_001101267.1 similar to myeloblastosis proto-oncogene product isoform 2 [Macaca mulatta] |
| LesAffx.3099.1.S1_at  | CK574995   | GO37548 | 6180 | 844 | 861 | 0.14 | 0.14 | Transcribed locus, moderately similar to NP_001044625.1 [Oryza sativa (japonica cultivar-group)]                                |
| Les.857.1.S1_at       | BT013838.1 | TC22565 | 1835 | 243 | 366 | 0.13 | 0.2  | Lycopersicon esculentum clone 132795F, mRNA sequence                                                                            |
| Les.4710.1.S1_at      | BT014526.1 | TC24079 | 370  | 34  | 33  | 0.09 | 0.09 | Lycopersicon esculentum clone 133940F, mRNA sequence                                                                            |
| LesAffx.1251.1.S1_at  | BG125851   | BG12585 | 516  | 46  | 82  | 0.09 | 0.16 | ---                                                                                                                             |
