# Supplementary material for: Transcriptome Analysis of Tomato Flower Pedicel Tissues Reveals Abscission Zone-Specific Modulation of Key Meristem Activity Genes
Source: PubMed Central journal article supplement (PMC3563536; doi:10.1371/journal.pone.0055238), 2013-02-04
Supplement: pone.0055238.s008.pdf [file pone.0055238.s008.pdf]

**Table S6.** *MapMan classification of differentially expressed non-redundant genes in the abscising AZ.*

| Affy_probe            | GB<br>Accession | At homolog  | Tomato<br>Gene Index | Cluster | 3h: 0h | 6h:0h | MapMan<br>code | Mapman category                                                                    | Arabidopsis annotation                                                                                                                                               |
|-----------------------|-----------------|-------------|----------------------|---------|--------|-------|----------------|------------------------------------------------------------------------------------|----------------------------------------------------------------------------------------------------------------------------------------------------------------------|
| LesAffx.64741.1.S1_at | AI775317        | AT3G60510.2 | TC22074              | I       | 1.46   | 1.19  | 13.2.6.3       | amino acid<br>metabolism.degradation.aromatic<br>aa.tryptophan                     | (at3g60510): enoyl-CoA hydratase/isomerase<br>family protein                                                                                                         |
| Les.5433.1.S1_at      | BT013909.1      | AT4G14430.1 | TC22191              | III     | 1.27   | 1.24  | 13.2.6.3       | amino acid<br>metabolism.degradation.aromatic<br>aa.tryptophan                     | (at4g14430): enoyl-CoA hydratase/isomerase<br>family protein                                                                                                         |
| LesAffx.11659.1.A1_at | BI422229        | AT1G12050.1 | TC24331              | V       | -0.65  | -1.64 | 13.2.6.2       | amino acid<br>metabolism.degradation.aromatic<br>aa.tyrosine                       | (at1g12050): fumarylacetoacetase, putative                                                                                                                           |
| LesAffx.67643.1.S1_at | BI926164        | AT3G16150.1 | TC22219              | I       | 1.7    | 0.06  | 13.2.3.1.1     | amino acid<br>metabolism.degradation.aspartate<br>family.asparagine.L-asparaginase | (at3g16150): L-asparaginase, putative / L-<br>asparagine amidohydrolase, putative                                                                                    |
| LesAffx.3379.1.A1_at  | AW039492        | AT4G34030.1 | TC24415              | I       | 0.99   | 0.62  | 13.2.4.4       | amino acid<br>metabolism.degradation.branched-<br>chain group.leucine              | (at4g34030): MCCB (3-METHYLCROTONYL-<br>COA CARBOXYLASE); biotin carboxylase                                                                                         |
| Les.4803.1.S1_at      | BT013418.1      | AT5G38710.1 | TC21851              | I       | 1.09   | 0.6   | 13.2.2.2       | amino acid<br>metabolism.degradation.glutamate<br>family.proline                   | (at5g38710): proline oxidase, putative / osmotic<br>stress-responsive proline dehydrogenase, putative                                                                |
| LesAffx.51554.1.A1_at | AW093474        | AT1G08630.2 | GO37601              | I       | 1.07   | -0.65 | 13.2.5.2       | amino acid<br>metabolism.degradation.serine-<br>glycine-cysteine group.glycine     | (at1g08630): THA1 (THREONINE ALDOLASE<br>1); aldehyde-lyase/ threonine aldolase                                                                                      |
| LesAffx.62131.1.S1_at | BE437087        | AT1G08630.4 | TC23252              | I       | 1.08   | -0.46 | 13.2.5.2       | amino acid<br>metabolism.degradation.serine-<br>glycine-cysteine group.glycine     | (at1g08630): THA1 (THREONINE ALDOLASE<br>1); aldehyde-lyase/ threonine aldolase                                                                                      |
| LesAffx.41477.1.S1_at | AI782352        | AT1G68010.1 | TC22420              | V       | -0.71  | -1.76 | 13.2.5.2       | amino acid<br>metabolism.degradation.serine-<br>glycine-cysteine group.glycine     | (at1g68010): HPR (Hydroxypyruvate reductase);<br>NAD binding / cofactor binding / oxidoreductase,<br>acting on the CH-OH group of donors, NAD or<br>NADP as acceptor |

|                       |            |             |         |     |       |       |             |                                                                                                          |                                                                                          |
|-----------------------|------------|-------------|---------|-----|-------|-------|-------------|----------------------------------------------------------------------------------------------------------|------------------------------------------------------------------------------------------|
| LesAffx.10955.1.S1_at | BI422058   | AT5G22630.1 | TC22366 | I   | 1.14  | 0.13  | 13.1.6.3.1  | amino acid metabolism.synthesis.aromatic aa.phenylalanine.arogenate dehydratase / prephenate dehydratase | (at5g22630): prephenate dehydratase family protein                                       |
| LesAffx.66354.1.S1_at | AI773917   | AT5G34930.1 | TC22427 | I   | 2.72  | 1.36  | 13.1.6.4.1  | amino acid metabolism.synthesis.aromatic aa.tyrosine.arogenate dehydrogenase \& prephenate dehydrogenase | (at5g34930): arogenate dehydrogenase                                                     |
| Les.4317.1.S1_at      | AW625684   | AT3G47340.1 | TC23953 | III | 0.86  | 1.61  | 13.1.3.1.1  | amino acid metabolism.synthesis.aspartate family.asparagine.asparagine synthetase                        | (at3g47340): ASN1 (DARK INDUCIBLE 6)                                                     |
| LesAffx.9260.1.S1_at  | AI781857   | AT5G52100.1 | DB68638 | VI  | -0.93 | -1.1  | 13.1.3.5.2  | amino acid metabolism.synthesis.aspartate family.lysine.dihydrodipicolinate reductase                    | (at5g52100): dihydrodipicolinate reductase family protein                                |
| Les.1054.1.S1_at      | BM412386   | AT3G22740.1 | TC21841 | I   | 1.09  | 0.61  | 13.1.3.4.12 | amino acid metabolism.synthesis.aspartate family.methionine.homocysteine S-methyltransferase             | (at3g22740): HMT3 (Homocysteine S-methyltransferase 3); homocysteine S-methyltransferase |
| Les.4488.1.S1_at      | BG628643   | AT3G10050.1 | TC22827 | V   | -0.19 | -2.05 | 13.1.4.5.1  | amino acid metabolism.synthesis.branched chain group.isoleucine specific.threonine ammonia-lyase         | (at3g10050): OMR1 (L-O-METHYLTHREONINE RESISTANT 1); threonine ammonia-lyase             |
| LesAffx.7894.1.S1_at  | AW933852   | AT5G19550.1 | TC23795 | II  | 0.13  | 1.36  | 13.1.1.2.1  | amino acid metabolism.synthesis.central amino acid metabolism.aspartate.aspartate aminotransferase       | (at5g19550): ASP2 (ASPARTATE AMINOTRANSFERASE 2)                                         |
| Les.3289.1.S1_at      | AY240229.1 | AT3G22200.1 | TC21835 | I   | 1.01  | 0.67  | 13.1.1.1.2  | amino acid metabolism.synthesis.central amino acid metabolism.GABA.GABA transaminase                     | (at3g22200): POP2 (POLLEN-PISTIL INCOMPATIBILITY 2); 4-aminobutyrate transaminase        |

|                       |            |             |         |    |       |       |            |                                                                                                     |                                                                                                        |
|-----------------------|------------|-------------|---------|----|-------|-------|------------|-----------------------------------------------------------------------------------------------------|--------------------------------------------------------------------------------------------------------|
| Les.4067.1.S1_at      | AY240231.1 | AT3G22200.1 | TC22590 | I  | 1.11  | 0.49  | 13.1.1.1.2 | amino acid metabolism.synthesis.central amino acid metabolism.GABA.GABA transaminase                | (at3g22200): POP2 (POLLEN-PISTIL INCOMPATIBILITY 2); 4-aminobutyrate transaminase                      |
| Les.1258.1.S1_at      | AY240230.1 | AT3G22200.1 | TC21731 | VI | -1.51 | -2.27 | 13.1.1.1.2 | amino acid metabolism.synthesis.central amino acid metabolism.GABA.GABA transaminase                | (at3g22200): POP2 (POLLEN-PISTIL INCOMPATIBILITY 2); 4-aminobutyrate transaminase                      |
| Les.3018.1.S1_at      | BT013902.1 | AT3G61440.1 | TC22606 | I  | 1.14  | 0.91  | 13.1.5.3.1 | amino acid metabolism.synthesis.serine-glycine-cysteine group.cysteine.OASTL                        | (at3g61440): ATCYSC1 (BETA-SUBSTITUTED ALA SYNTHASE 3;1); L-3-cyanoalanine synthase/ cysteine synthase |
| Les.3290.1.S1_at      | BG123573   | AT1G70580.4 | TC22022 | VI | -1.08 | -1.41 | 13.1.5.2.2 | amino acid metabolism.synthesis.serine-glycine-cysteine group.glycine.glycine transaminase          | (at1g70580): AOAT2 (ALANINE-2-OXOGLUTARATE AMINOTRANSFERASE 2); alanine transaminase                   |
| Les.2703.1.S1_at      | BG735318   | AT1G17745.1 | TC23293 | VI | -0.91 | -1.11 | 13.1.5.1.1 | amino acid metabolism.synthesis.serine-glycine-cysteine group.serine.phosphoglycerate dehydrogenase | (at1g17745): PGDH (3-PHOSPHOGLYCERATE DEHYDROGENASE); phosphoglycerate dehydrogenase                   |
| Les.1665.1.S1_at      | AW623646   | AT1G80160.1 | DB71244 | I  | 1.81  | 1.06  | 24.2       | Biodegradation of Xenobiotics.lactoylglutathione lyase                                              | (at1g80160): lactoylglutathione lyase family protein / glyoxalase I family protein                     |
| LesAffx.9007.1.S1_at  | CN385923   | AT1G80160.1 | GO37540 | IV | -1.22 | -0.69 | 24.2       | Biodegradation of Xenobiotics.lactoylglutathione lyase                                              | (at1g80160): lactoylglutathione lyase family protein / glyoxalase I family protein                     |
| Les.3610.1.S1_at      | BG629712   | AT4G13340.1 | TC23477 | II | 1.05  | 3.31  | 10.5.3     | cell wall.cell wall proteins.LRR                                                                    | (at4g13340): leucine-rich repeat family protein / extensin family protein                              |
| Les.2946.2.S1_at      | BG130169   | AT3G22800.1 | TC22071 | V  | -0.24 | -1.27 | 10.5.3     | cell wall.cell wall proteins.LRR                                                                    | (at3g22800): leucine-rich repeat family protein / extensin family protein                              |
| Les.3330.1.S1_at      | AW650121   | AT4G12730.1 | TC24355 | VI | -1.2  | -1.12 | 10.5.1     | cell wall.cell wall proteins.AGPs                                                                   | (at4g12730): FLA2 (FLA2)                                                                               |
| LesAffx.70270.1.S1_at | AI773931   | AT5G22740.1 | TC23665 | IV | -1.81 | -1.19 | 10.2       | cell wall.cellulose synthesis                                                                       | (at5g22740): ATCSLA02 (Cellulose synthase-like A2); transferase, transferring glycosyl groups          |

|                       |            |             |         |     |       |       |        |                                                             |                                                                                                                                                      |
|-----------------------|------------|-------------|---------|-----|-------|-------|--------|-------------------------------------------------------------|------------------------------------------------------------------------------------------------------------------------------------------------------|
| Les.2316.1.S1_at      | AW623527   | AT4G24000.1 | TC22940 | V   | -1.83 | -4.42 | 10.2.1 | cell wall.cellulose synthesis.cellulose synthase            | (at4g24000): ATCSLG2 (Cellulose synthase-like G2); transferase/ transferase, transferring glycosyl groups                                            |
| Les.4520.1.S1_at      | BT013422.1 | AT3G02210.1 | GO37596 | VI  | -1.14 | -0.98 | 10.2.2 | cell wall.cellulose synthesis.COBRA                         | (at3g02210): phytochelatin synthetase family protein / COBRA cell expansion protein COBL3                                                            |
| Les.4549.1.S1_at      | BT013085.1 | AT2G32990.1 | TC24365 | VI  | -1.21 | -1.31 | 10.6.1 | cell wall.degradation.cellulases and beta -1,4-glucanases   | (at2g32990): glycosyl hydrolase family 9 protein                                                                                                     |
| Les.3663.1.S1_at      | X55193.1   | AT3G27400.1 | TC22989 | II  | -0.82 | 1.41  | 10.6.3 | cell wall.degradation.pectate lyases and polygalacturonases | (at3g27400): pectate lyase family protein                                                                                                            |
| Les.4707.1.S1_at      | BT012714.1 | AT4G24780.1 | TC23557 | II  | -1    | 1.57  | 10.6.3 | cell wall.degradation.pectate lyases and polygalacturonases | (at4g24780): pectate lyase family protein                                                                                                            |
| Les.3646.1.S1_at      | U70481.1   | AT3G59850.1 | TC21735 | III | 3.06  | 3.29  | 10.6.3 | cell wall.degradation.pectate lyases and polygalacturonases | (at3g59850): polygalacturonase, putative / pectinase, putative                                                                                       |
| Les.3647.1.S1_at      | U70480.1   | AT3G59850.1 | TC21734 | III | 4.91  | 5.38  | 10.6.3 | cell wall.degradation.pectate lyases and polygalacturonases | (at3g59850): polygalacturonase, putative / pectinase, putative                                                                                       |
| Les.3665.1.S1_at      | U23053.1   | AT3G59850.1 | TC21734 | III | 5.41  | 7.31  | 10.6.3 | cell wall.degradation.pectate lyases and polygalacturonases | (at3g59850): polygalacturonase, putative / pectinase, putative                                                                                       |
| LesAffx.13252.1.S1_at | BI929109   | AT1G67830.1 | TC22202 | IV  | -1.78 | -0.97 | 10.6.2 | cell wall.degradation.mannan-xylose-arabinose-fucose        | (at1g67830): ATEXG1 (ALPHA-FUCOSIDASE 1); alpha-L-fucosidase/ carboxylic ester hydrolase                                                             |
| Les.263.1.S1_at       | M98466.1   | AT1G70370.1 | TC21722 | IV  | -1.61 | 0.15  | 10.6.3 | cell wall.degradation.pectate lyases and polygalacturonases | (at1g70370): BURP domain-containing protein / polygalacturonase, putative                                                                            |
| LesAffx.1276.1.S1_at  | BG130074   | AT5G48900.1 | TC23044 | V   | -0.55 | -1.24 | 10.6.3 | cell wall.degradation.pectate lyases and polygalacturonases | (at5g48900): pectate lyase family protein                                                                                                            |
| Les.857.1.S1_at       | BT013838.1 | AT3G61490.2 | TC22565 | VI  | -2.2  | -2.13 | 10.6.3 | cell wall.degradation.pectate lyases and polygalacturonases | (at3g61490): glycoside hydrolase family 28 protein / polygalacturonase (pectinase) family protein                                                    |
| LesAffx.56547.2.S1_at | BI207815   | AT5G06870.1 | TC22569 | VI  | -2.08 | -2.52 | 10.6.3 | cell wall.degradation.pectate lyases and polygalacturonases | (at5g06870): PGIP2 (POLYGALACTURONASE INHIBITING PROTEIN 2); protein binding                                                                         |
| Les.191.1.S1_at       | AF548376.1 | AT2G39700.1 | TC21771 | II  | -0.56 | 2.18  | 10.7   | cell wall.modification                                      | (at2g39700): ATEXPA4 (ARABIDOPSIS THALIANA EXPANSIN A4)                                                                                              |
| Les.2688.1.S1_at      | AJ560646.1 | AT5G39270.1 | TC21917 | II  | 1.08  | 3.02  | 10.7   | cell wall.modification                                      | MULTIPLE HITS: (at5g39270,at5g39290). at5g39270: ATEXPA22 (ARABIDOPSIS THALIANA EXPANSIN A22) at5g39290: ATEXP26 (ARABIDOPSIS THALIANA EXPANSIN A26) |

|                       |            |             |         |     |       |       |      |                        |                                                                                                                                                    |
|-----------------------|------------|-------------|---------|-----|-------|-------|------|------------------------|----------------------------------------------------------------------------------------------------------------------------------------------------|
| Les.369.1.S1_at       | AF059489.1 | AT1G26770.2 | TC21922 | IV  | -1.6  | -0.41 | 10.7 | cell wall.modification | (at1g26770): ATEXPA10 (ARABIDOPSIS THALIANA EXPANSIN A10)                                                                                          |
| Les.3972.1.S1_at      | AJ243340.1 | AT2G28950.1 | TC22219 | IV  | -1.87 | 0.08  | 10.7 | cell wall.modification | (at2g28950): ATEXPA6 (ARABIDOPSIS THALIANA EXPANSIN A6)                                                                                            |
| Les.3733.1.S1_at      | AF096776.1 | AT2G40610.1 | TC21836 | IV  | -1.28 | -0.4  | 10.7 | cell wall.modification | (at2g40610): ATEXPA8 (ARABIDOPSIS THALIANA EXPANSIN A8)                                                                                            |
| Les.3569.1.S1_at      | AF059487.1 | AT3G03220.1 | TC21833 | IV  | -1.35 | -0.56 | 10.7 | cell wall.modification | (at3g03220): ATEXPA13 (ARABIDOPSIS THALIANA EXPANSIN A13)                                                                                          |
| Les.4353.1.S1_at      | AY497476.1 | AT5G57560.1 | TC21758 | I   | 2.55  | 1.93  | 10.7 | cell wall.modification | XTH (at5g57560): TCH4 (TOUCH 4); hydrolase, acting on glycosyl bonds                                                                               |
| Les.429.1.S1_at       | X82684.1   | AT3G23730.1 | TC22396 | I   | 2.65  | 1.72  | 10.7 | cell wall.modification | XTH (at3g23730): xyloglucan:xyloglucosyl transferase, putative / xyloglucan endotransglycosylase, putative / endo-xyloglucan transferase, putative |
| Les.4530.1.S1_at      | AY497479.1 | AT3G23730.1 | TC21992 | III | 2.36  | 3.61  | 10.7 | cell wall.modification | XTH (at3g23730): xyloglucan:xyloglucosyl transferase, putative / xyloglucan endotransglycosylase, putative / endo-xyloglucan transferase, putative |
| Les.4523.1.S1_at      | AY497475.1 | AT4G18990.1 | TC21776 | III | 1.25  | 1.21  | 10.7 | cell wall.modification | XTH (at4g18990): xyloglucan:xyloglucosyl transferase, putative / xyloglucan endotransglycosylase, putative / endo-xyloglucan transferase, putative |
| LesAffx.24799.1.S1_at | CK715756   | AT1G11545.1 | TC23394 | IV  | -1.2  | -0.55 | 10.7 | cell wall.modification | XTH (at1g11545): xyloglucan:xyloglucosyl transferase, putative / xyloglucan endotransglycosylase, putative / endo-xyloglucan transferase, putative |
| LesAffx.69296.1.A1_at | AW092917   | AT2G36870.1 | TC22654 | V   | -0.52 | -1.65 | 10.7 | cell wall.modification | XTH (at2g36870): xyloglucan:xyloglucosyl transferase, putative / xyloglucan endotransglycosylase, putative / endo-xyloglucan transferase, putative |
| Les.4522.1.S1_at      | AY497477.1 | AT3G44990.1 | TC23773 | V   | -0.35 | -2.57 | 10.7 | cell wall.modification | XTH (at3g44990): XTR8 (xyloglucan:xyloglucosyl transferase 8); hydrolase, acting on glycosyl bonds                                                 |

|                       |            |             |         |     |       |       |          |                                                                       |                                                                                                                                                    |
|-----------------------|------------|-------------|---------|-----|-------|-------|----------|-----------------------------------------------------------------------|----------------------------------------------------------------------------------------------------------------------------------------------------|
| Les.4529.1.S1_at      | AY497478.1 | AT4G37800.1 | TC21903 | VI  | -1.22 | -1.92 | 10.7     | cell.wall.modification                                                | XTH (at4g37800): xyloglucan:xyloglucosyl transferase, putative / xyloglucan endotransglycosylase, putative / endo-xyloglucan transferase, putative |
| Les.3122.1.S1_a_at    | BT013364.1 | AT3G43270.1 | TC21726 | IV  | -1.43 | -0.18 | 10.8.1   | cell.wall.pectin*esterases.PME                                        | (at3g43270): pectinesterase family protein                                                                                                         |
| Les.67.1.S1_at        | U49330.1   | AT3G14310.1 | TC21724 | IV  | -1.25 | -0.46 | 10.8.1   | cell.wall.pectin*esterases.PME                                        | (at3g14310): ATPME3 (Arabidopsis thaliana pectin methylesterase 3)                                                                                 |
| LesAffx.10497.2.A1_at | AI897776   | AT3G49220.1 | TC24435 | VI  | -1.57 | -1.48 | 10.8.1   | cell.wall.pectin*esterases.PME                                        | (at3g49220): pectinesterase family protein                                                                                                         |
| Les.1248.2.A1_at      | BT012749.1 | AT2G39770.1 | TC21728 | VI  | -0.89 | -1.23 | 10.1.1.1 | cell.wall.precursor synthesis.NDP sugar pyrophosphorylase.GDP mannose | (at2g39770): CYT1 (CYTOKINESIS DEFECTIVE 1); nucleotidyltransferase                                                                                |
| Les.103.1.S1_at       | AJ243451.1 | AT1G44110.1 | TC22759 | V   | -0.5  | -1.13 | 31.3     | cell.cycle                                                            | (at1g44110): CYCA1;1 (CYCLIN A1;1); cyclin-dependent protein kinase regulator                                                                      |
| LesAffx.69295.1.S1_at | BI933687   | AT2G45080.1 | TC23040 | V   | -1.15 | -2.24 | 31.3     | cell.cycle                                                            | (at2g45080): CYCP3;1 (cyclin p3;1); cyclin-dependent protein kinase                                                                                |
| Les.3055.1.S1_at      | AJ002590.1 | AT3G50070.1 | TC21769 | IV  | -1.49 | -0.34 | 31.3     | cell.cycle                                                            | (at3g50070): CYCD3;3 (CYCLIN D3;3); cyclin-dependent protein kinase                                                                                |
| Les.3519.1.S1_at      | AJ002589.1 | AT3G50070.1 | TC23298 | IV  | -2.06 | -0.72 | 31.3     | cell.cycle                                                            | (at3g50070): CYCD3;3 (CYCLIN D3;3); cyclin-dependent protein kinase                                                                                |
| Les.4444.1.S1_s_at    | BI207010   | AT5G67260.1 | TC22444 | IV  | -1.54 | -0.34 | 31.3     | cell.cycle                                                            | (at5g67260): CYCD3;2 (CYCLIN D3;2); cyclin-dependent protein kinase                                                                                |
| LesAffx.38145.1.A1_at | AI487713   | AT5G10490.2 | BM40940 | V   | -0.31 | -1.08 | 31.2.5   | cell.division.plastid                                                 | (at5g10490): MSL2 (MSCS-LIKE 2)                                                                                                                    |
| LesAffx.1001.1.S1_at  | BM535807   | AT2G18280.2 | TC22526 | I   | 1.3   | 0.85  | 31.1     | cell.organisation                                                     | (at2g18280): AtTLP2 (TUBBY LIKE PROTEIN 2); phosphoric diester hydrolase/ transcription factor                                                     |
| Les.5161.1.S1_at      | BT013412.1 | AT2G37080.1 | AI77756 | VI  | -1.81 | -1.34 | 31.1     | cell.organisation                                                     | (at2g37080): myosin heavy chain-related                                                                                                            |
| Les.1514.1.S1_at      | BG626292   | AT2G35490.1 | TC23484 | V   | -0.51 | -1.09 | 31.1     | cell.organisation                                                     | (at2g35490): plastid-lipid associated protein PAP, putative                                                                                        |
| LesAffx.64540.1.S1_at | AW441832   | AT5G19940.1 | TC22052 | V   | 0.02  | -1.06 | 31.1     | cell.organisation                                                     | (at5g19940): plastid-lipid associated protein PAP-related / fibrillin-related                                                                      |
| LesAffx.37916.1.S1_at | BM536108   | AT1G09155.1 | TC23806 | III | 1.03  | 1.58  | 31.1     | cell.organisation                                                     | (at1g09155): ATPP2-B15 (Phloem protein 2-B15)                                                                                                      |
| Les.4564.1.S1_at      | BT013856.1 | AT5G55230.1 | TC21760 | IV  | -1.31 | -0.58 | 31.1     | cell.organisation                                                     | (at5g55230): ATMAP65-1 (MICROTUBULE-ASSOCIATED PROTEINS 65-1); microtubule binding                                                                 |

|                       |            |             |         |     |       |       |        |                                                          |                                                                                                                                                           |
|-----------------------|------------|-------------|---------|-----|-------|-------|--------|----------------------------------------------------------|-----------------------------------------------------------------------------------------------------------------------------------------------------------|
| LesAffx.71000.1.S1_at | BF096685   | AT5G50375.1 | TC23035 | IV  | -1.05 | -0.61 | 31.4   | cell.vesicle transport                                   | (at5g50375): CPI1 (CYCLOPROPYL ISOMERASE)                                                                                                                 |
| Les.1044.1.A1_at      | BG629030   | AT2G43360.1 | TC23609 | II  | -0.11 | 1.5   | 18.6.1 | Co-factor and vitamine metabolism.biotin.biotin synthase | (at2g43360): BIO2 (BIOTIN AUXOTROPH 2); biotin synthase                                                                                                   |
| LesAffx.66163.1.S1_at | AW222774   | AT3G16190.1 | TC22788 | III | 1.08  | 1.18  | 18.13  | Co-factor and vitamine metabolism.isochorismatase        | (at3g16190): isochorismatase hydrolase family protein                                                                                                     |
| LesAffx.3099.1.S1_at  | CK574995   | AT5G54770.1 | GO37548 | VI  | -3.15 | -3.07 | 18.2   | Co-factor and vitamine metabolism.thiamine               | (at5g54770): THI1 (THIAZOLE REQUIRING)                                                                                                                    |
| Les.4594.1.S1_at      | BT012739.1 | AT2G29630.1 | TC23704 | IV  | -2.84 | -1.41 | 18.2   | Co-factor and vitamine metabolism.thiamine               | (at2g29630): thiamine biosynthesis family protein / thiC family protein                                                                                   |
| Les.2212.1.A1_at      | BG735110   | AT5G13790.1 | BG73511 | I   | 1.33  | 0.61  | 33.99  | development.unspecified                                  | TF (at5g13790): AGL15 (AGAMOUS-LIKE 15); DNA binding / transcription factor                                                                               |
| Les.4483.1.S1_at      | AY498713.1 | AT1G01720.1 | TC21812 | I   | 1.17  | 0.18  | 33.99  | development.unspecified                                  | TF (at1g01720): ATAF1 (Arabidopsis NAC domain containing protein 2); transcription factor                                                                 |
| LesAffx.43329.1.A1_at | AI489164   | AT5G07680.1 | TC23564 | I   | 1.54  | 0.9   | 33.99  | development.unspecified                                  | TF (at5g07680): ANAC079/ANAC080/ATNAC4 (Arabidopsis NAC domain containing protein 79, Arabidopsis NAC domain containing protein 80); transcription factor |
| LesAffx.57572.1.S1_at | CN385925   | AT4G37060.1 | TC21838 | II  | 0.19  | 0.98  | 33.1   | development.storage proteins                             | MULTIPLE HITS: (at4g37070,at4g37060). at4g37070: PLA IVA/PLP1; nutrient reservoir at4g37060: PLA IVB/PLP5 (Patatin-like protein 5); nutrient reservoir    |
| Les.3759.1.S1_at      | Z46654.1   | AT2G46140.1 | TC21776 | III | 1.02  | 1.18  | 33.2   | development.late embryogenesis abundant                  | (at2g46140): late embryogenesis abundant protein, putative / LEA protein, putative                                                                        |
| Les.3766.1.S1_at      | U77719.1   | AT1G01470.1 | TC21779 | III | 2.33  | 2.22  | 33.2   | development.late embryogenesis abundant                  | (at1g01470): LEA14 (LATE EMBRYOGENESIS ABUNDANT 14)                                                                                                       |
| Les.2084.1.S1_at      | BF097539   | AT1G69490.1 | TC22764 | III | 1.74  | 1.5   | 33.99  | development.unspecified                                  | TF (at1g69490): NAP (NAC-LIKE, ACTIVATED BY AP3/PI); transcription factor                                                                                 |
| Les.2494.1.S1_at      | AJ785249   | AT3G48140.1 | BI20405 | III | 0.63  | 1     | 33.99  | development.unspecified                                  | (at3g48140): senescence-associated protein, putative                                                                                                      |
| Les.2717.1.S1_at      | AW218373   | AT3G48140.1 | TC22994 | III | 1.86  | 1.76  | 33.99  | development.unspecified                                  | (at3g48140): senescence-associated protein, putative                                                                                                      |
| Les.5044.1.S1_at      | BT013168.1 | AT2G35980.1 | TC22109 | III | 1.13  | 1.47  | 33.99  | development.unspecified                                  | (at2g35980): YLS9 (YELLOW-LEAF-SPECIFIC GENE 9)                                                                                                           |
| LesAffx.31514.1.S1_at | BG127453   | AT1G75500.1 | TC22656 | III | 0.58  | 1.01  | 33.99  | development.unspecified                                  | (at1g75500): nodulin MtN21 family protein                                                                                                                 |

|                       |            |             |         |     |       |       |       |                                     |                                                                                                                            |
|-----------------------|------------|-------------|---------|-----|-------|-------|-------|-------------------------------------|----------------------------------------------------------------------------------------------------------------------------|
| Les.1348.1.A1_at      | BG631005   | AT4G17670.1 | TC22489 | IV  | -1.88 | -1.23 | 33.99 | development.unspecified             | (at4g17670): senescence-associated protein-related                                                                         |
| Les.4731.1.S1_at      | BT013577.1 | AT5G60690.1 | TC23297 | IV  | -1.63 | -0.44 | 33.99 | development.unspecified             | TF (at5g60690): REV (REVOLUTA); DNA binding / lipid binding / transcription factor                                         |
| Les.4962.1.S1_at      | BI204454   | AT2G19580.1 | TC22450 | IV  | -1.36 | -0.15 | 33.99 | development.unspecified             | (at2g19580): TET2 (TETRASPANIN2)                                                                                           |
| Les.4987.1.S1_at      | BT013055.1 | AT3G45600.1 | TC23511 | IV  | -1.61 | -0.78 | 33.99 | development.unspecified             | (at3g45600): TET3 (TETRASPANIN3)                                                                                           |
| LesAffx.56237.1.S1_at | AW218110   | AT2G37460.1 | TC22223 | IV  | -1.34 | 0.01  | 33.99 | development.unspecified             | (at2g37460): nodulin MtN21 family protein                                                                                  |
| LesAffx.66974.1.S1_at | BG135595   | AT5G46700.1 | TC23429 | IV  | -2    | 0.25  | 33.99 | development.unspecified             | (at5g46700): TRN2 (TORNADO 2)                                                                                              |
| LesAffx.26970.1.S1_at | BF050591   | AT4G17230.1 | BF05059 | V   | -0.75 | -1.27 | 33.99 | development.unspecified             | TF (at4g17230): SCL13 (SCARECROW-LIKE 13); transcription factor                                                            |
| LesAffx.65682.1.A1_at | AI489857   | AT5G50790.1 | TC22844 | V   | -0.47 | -1.67 | 33.99 | development.unspecified             | (at5g50790): nodulin MtN3 family protein                                                                                   |
| LesAffx.68607.1.S1_at | BM409831   | AT3G54950.1 | TC23658 | VI  | -1.29 | -1    | 33.1  | development.storage proteins        | (at3g54950): PLA IIIA/PLP7 (Patatin-like protein 7)                                                                        |
| Les.4362.1.A1_at      | AY306154.1 | AT1G69120.1 | TC22524 | VI  | -0.82 | -1.05 | 33.99 | development.unspecified             | TF (at1g69120): AP1 (APETALA1); DNA binding / transcription factor                                                         |
| LesAffx.66165.1.S1_at | AW649540   | AT5G53090.1 | TC22272 | VI  | -1.09 | -0.89 | 33.99 | development.unspecified             | (at5g53090): oxidoreductase                                                                                                |
| LesAffx.885.1.S1_at   | BI205930   | AT1G63260.3 | BI20593 | VI  | -1.84 | -1.44 | 33.99 | development.unspecified             | (at1g63260): TET10 (TETRASPANIN10)                                                                                         |
| Les.5740.1.S1_at      | BT014477.1 | AT2G24490.2 | TC22279 | II  | -0.15 | 0.98  | 28.2  | DNA.repair                          | (at2g24490): ATRPA2/ROR1/RPA2 (REPLICON PROTEIN A); protein binding                                                        |
| LesAffx.56137.1.A1_at | AI490099   | AT1G11190.1 | TC22599 | II  | 1.11  | 2.75  | 28.1  | DNA.synthesis/chromatin structure   | (at1g11190): BFN1 (BIFUNCTIONAL NUCLEASE I); nucleic acid binding                                                          |
| Les.4948.1.S1_at      | BT012962.1 | AT1G68290.1 | TC23041 | III | 0.88  | 1.53  | 28.1  | DNA.synthesis/chromatin structure   | (at1g68290): bifunctional nuclease, putative                                                                               |
| Les.4412.1.A1_at      | BG627732   | AT3G13610.1 | TC23503 | VI  | -1.05 | -1.35 | 28.99 | DNA.unspecified                     | (at3g13610): oxidoreductase, 2OG-Fe(II) oxygenase family protein                                                           |
| Les.360.1.S1_at       | M86724.1   | AT1G77120.1 | TC23986 | IV  | -1.83 | 0.28  | 5.3   | fermentation.ADH                    | (at1g77120): ADH1 (ALCOHOL DEHYDROGENASE 1); alcohol dehydrogenase                                                         |
| LesAffx.13053.1.S1_at | AW032379   | AT3G24503.1 | TC22409 | I   | 1.15  | 0.92  | 5.1   | fermentation.aldehyde dehydrogenase | (at3g24503): ALDH2C4 (REDUCED EPIDERMAL FLUORESCENCE1); 3-chloroallyl aldehyde dehydrogenase/ aldehyde dehydrogenase (NAD) |
| Les.2831.1.S1_at      | BG627219   | AT3G48000.1 | TC22500 | IV  | -1.48 | -0.95 | 5.1   | fermentation.aldehyde dehydrogenase | (at3g48000): ALDH2B4 (ALDEHYDE DEHYDROGENASE 2); 3-chloroallyl aldehyde dehydrogenase/ aldehyde dehydrogenase (NAD)        |



|                       |            |             |         |     |       |       |            |                                                                                                     |                                                                                                                       |
|-----------------------|------------|-------------|---------|-----|-------|-------|------------|-----------------------------------------------------------------------------------------------------|-----------------------------------------------------------------------------------------------------------------------|
| Les.4617.1.S1_at      | BT014212.1 | AT2G24270.1 | TC23312 | V   | -0.86 | -2.24 | 4.1.9      | glycolysis.cytosolic branch.non-phosphorylating glyceraldehyde 3-phosphate dehydrogenase (NPGAP-DH) | (at2g24270): ALDH11A3 (Aldehyde dehydrogenase 11A3); 3-chloroallyl aldehyde dehydrogenase                             |
| Les.19.1.S1_at        | BG626377   | AT1G53310.3 | TC24377 | VI  | -1.1  | -1.42 | 4.1.15     | glycolysis.cytosolic branch.phospho-enol-pyruvate carboxylase (PEPC)                                | (at1g53310): ATPPC1 (PHOSPHOENOLPYRUVATE CARBOXYLASE 1); phosphoenolpyruvate carboxylase                              |
| Les.2909.1.S1_at      | AW223174   | AT1G53310.3 | TC24474 | V   | -0.96 | -1.92 | 4.1.15     | glycolysis.cytosolic branch.phospho-enol-pyruvate carboxylase (PEPC)                                | (at1g53310): ATPPC1 (PHOSPHOENOLPYRUVATE CARBOXYLASE 1); phosphoenolpyruvate carboxylase                              |
| Les.4099.1.S1_at      | AY187634.1 | AT1G08650.1 | TC21751 | V   | -0.37 | -1.08 | 4.1.16     | glycolysis.cytosolic branch.phospho-enol-pyruvate carboxylase kinase (PPCK)                         | (at1g08650): PPCK1 (PHOSPHOENOLPYRUVATE CARBOXYLASE KINASE); kinase                                                   |
| Les.3539.1.S1_at      | AF203481.1 | AT3G04530.1 | TC21733 | III | 0.67  | 1.04  | 4.3.16     | glycolysis.unclear/dually targeted.phospho-enol-pyruvate carboxylase kinase (PEPCK)                 | (at3g04530): PPCK2 (PHOSPHOENOLPYRUVATE CARBOXYLASE KINASE 2); kinase                                                 |
| LesAffx.22699.1.A1_at | AI489739   | AT4G19230.2 | TC23987 | III | 3.29  | 3.56  | 17.1.1.2.1 | hormone metabolism.abscisic acid.synthesis-degradation.degradation.8-hydroxylase                    | (at4g19230): CYP707A1 (cytochrome P450, family 707, subfamily A, polypeptide 1); oxygen binding                       |
| Les.112.1.S1_at       | BG734834   | AT5G67030.1 | TC21719 | VI  | -0.87 | -1.42 | 17.1.1.1.1 | hormone metabolism.abscisic acid.synthesis-degradation.synthesis.zeaxanthin epoxidase               | (at5g67030): ABA1 (ABA DEFICIENT 1); zeaxanthin epoxidase                                                             |
| Les.5177.1.S1_at      | BT013446.1 | AT2G23170.1 | TC24190 | II  | 1.15  | 3.86  | 17.2.3     | hormone metabolism.auxin.induced-                                                                   | (at2g23170): GH3.3; indole-3-acetic acid amido synthetase                                                             |
| Les.5312.1.S1_at      | BT013697.1 | AT2G46370.2 | TC22735 | V   | -1.44 | -2.8  | 17.2.3     | hormone metabolism.auxin.induced-                                                                   | (at2g46370): JAR1 (JASMONATE RESISTANT 1)                                                                             |
| Les.5114.1.S1_at      | BT013305.1 | AT3G47620.1 | TC24276 | VI  | -1.11 | -1.15 | 17.2.3     | hormone metabolism.auxin.induced-                                                                   | (at3g47620): TCP family transcription factor, putative                                                                |
| Les.5745.1.S1_at      | BT014484.1 | AT1G05560.1 | TC22393 | V   | -0.79 | -1.56 | 17.2.1     | hormone metabolism.auxin.synthesis-degradation                                                      | (at1g05560): UGT1 (UDP-glucosyl transferase 75B1); UDP-glycosyltransferase/ transferase, transferring glycosyl groups |

|                       |            |             |         |     |       |       |            |                                                                                                         |                                                                                                                                                                                            |
|-----------------------|------------|-------------|---------|-----|-------|-------|------------|---------------------------------------------------------------------------------------------------------|--------------------------------------------------------------------------------------------------------------------------------------------------------------------------------------------|
| Les.3216.1.S1_at      | AW930422   | AT1G51760.1 | TC22776 | VI  | -1.42 | -1.3  | 17.2.1     | hormone<br>metabolism.auxin.synthesis-<br>degradation                                                   | MULTIPLE HITS: (at1g51760,at1g51780).<br>at1g51760: IAR3 (IAA-ALANINE RESISTANT<br>3); metallopeptidase at1g51780: ILL5 (IAA-<br>leucine resistant (ILR)-like gene 5);<br>metallopeptidase |
| LesAffx.59842.1.S1_at | BI205718   | AT3G50660.1 | TC21823 | II  | 0.07  | 2.76  | 17.3.1.1.2 | hormone<br>metabolism.brassinosteroid.synthes<br>is-degradation.BRs.DWF4                                | (at3g50660): DWF4 (DWARF 4)                                                                                                                                                                |
| Les.1212.1.S1_at      | AY584532.1 | AT3G19820.2 | GO37246 | VI  | -1.41 | -0.98 | 17.3.1.2.8 | hormone<br>metabolism.brassinosteroid.synthes<br>is-degradation.sterols.DWF1                            | (at3g19820): DWF1 (DIMINUTO 1); catalytic                                                                                                                                                  |
| Les.2474.1.S1_at      | BG791226   | AT3G19820.2 | TC23985 | VI  | -2.04 | -1.99 | 17.3.1.2.8 | hormone<br>metabolism.brassinosteroid.synthes<br>is-degradation.sterols.DWF1                            | (at3g19820): DWF1 (DIMINUTO 1); catalytic                                                                                                                                                  |
| LesAffx.7.1.S1_at     | AW931153   | AT3G52940.1 | TC22173 | VI  | -0.85 | -1.14 | 17.3.1.2.4 | hormone<br>metabolism.brassinosteroid.synthes<br>is-degradation.sterols.FACKEL                          | (at3g52940): FK (FACKEL); delta14-sterol<br>reductase                                                                                                                                      |
| Les.3818.1.S1_at      | AF502085.1 | AT3G23240.1 | TC21752 | I   | 1.93  | 1.22  | 17.5.2     | hormone<br>metabolism.ethylene.signal<br>transduction                                                   | (at3g23240): ATERF1/ERF1 (ETHYLENE<br>RESPONSE FACTOR 1); DNA binding /<br>transcription factor/ transcriptional activator                                                                 |
| Les.4140.1.S1_at      | AY192367.1 | AT5G47220.1 | TC22892 | I   | 1.05  | 0.31  | 17.5.2     | hormone<br>metabolism.ethylene.signal<br>transduction                                                   | (at5g47220): ATERF-2/ATERF2/ERF2<br>(ETHYLENE RESPONSE FACTOR 2); DNA<br>binding / transcription factor/ transcriptional<br>activator                                                      |
| LesAffx.3059.1.S1_at  | AI776626   | AT3G23220.1 | AI77662 | I   | 1.54  | 0.39  | 17.5.2     | hormone<br>metabolism.ethylene.signal<br>transduction                                                   | (at3g23220): DNA binding / transcription factor                                                                                                                                            |
| Les.3662.1.S1_at      | M34289.1   | AT4G11280.1 | TC21724 | I   | 1     | 0.59  | 17.5.1.1   | hormone<br>metabolism.ethylene.synthesis-<br>degradation.l-aminocyclopropane-<br>1-carboxylate synthase | (at4g11280): ACS6 (1-<br>AMINOCYCLOPROPANE-1-CARBOXYLIC<br>ACID (ACC) SYNTHASE 6)                                                                                                          |
| Les.3465.1.S1_at      | AY079426.1 | AT3G04580.2 | TC21718 | III | 1.87  | 2.29  | 17.5.2     | hormone<br>metabolism.ethylene.signal<br>transduction                                                   | LeETR6 (at3g04580): EIN4 (ETHYLENE<br>INSENSITIVE 4); receptor                                                                                                                             |

|                         |            |             |         |     |       |       |          |                                                                                                        |                                                                                                                                    |
|-------------------------|------------|-------------|---------|-----|-------|-------|----------|--------------------------------------------------------------------------------------------------------|------------------------------------------------------------------------------------------------------------------------------------|
| Les.3575.1.S1_at        | U89256.1   | AT4G17500.1 | TC22509 | III | 2.07  | 2.23  | 17.5.2   | hormone<br>metabolism.ethylene.signal<br>transduction                                                  | (at4g17500): ATERF-1 (ETHYLENE RESPONSIVE ELEMENT BINDING FACTOR 1); DNA binding / transcription factor/ transcriptional activator |
| LesAffx.33607.1.S1_s_at | AW223067   | AT5G43450.1 | TC23890 | III | 1.64  | 1.48  | 17.5.1   | hormone<br>metabolism.ethylene.synthesis-<br>degradation                                               | (at5g43450): 2-oxoglutarate-dependent dioxygenase, putative                                                                        |
| Les.132.1.S1_at         | X58885.1   | AT1G05010.1 | TC21743 | III | 2.95  | 2.96  | 17.5.1.2 | hormone<br>metabolism.ethylene.synthesis-<br>degradation.1-aminocyclopropane-<br>1-carboxylate oxidase | (at1g05010): EFE (ethylene forming enzyme)                                                                                         |
| Les.5917.1.S1_at        | AJ715790.1 | AT2G19590.1 | TC21740 | III | 1.04  | 1.27  | 17.5.1.2 | hormone<br>metabolism.ethylene.synthesis-<br>degradation.1-aminocyclopropane-<br>1-carboxylate oxidase | (at2g19590): ACO1 (ACC OXIDASE 1); 1-aminocyclopropane-1-carboxylate oxidase                                                       |
| LesAffx.70590.1.S1_at   | AI775408   | AT4G21340.1 | TC22762 | V   | -0.26 | -1.1  | 17.5.3   | hormone<br>metabolism.ethylene.induced-<br>regulated-responsive-activated                              | (at4g21340): B70; transcription factor                                                                                             |
| LesAffx.57163.2.S1_at   | BI421649   | AT1G62380.1 | TC22802 | V   | 1.43  | -1.23 | 17.5.1.2 | hormone<br>metabolism.ethylene.synthesis-<br>degradation.1-aminocyclopropane-<br>1-carboxylate oxidase | (at1g62380): ACO2 (ACC OXIDASE 2)                                                                                                  |
| Les.3500.1.S1_at        | AF043085.1 | AT1G66340.1 | TC21717 | VI  | -1.4  | -1.07 | 17.5.2   | hormone<br>metabolism.ethylene.signal<br>transduction                                                  | LeETR2 (at1g66340): ETR1 (ETHYLENE RESPONSE 1); two-component response regulator                                                   |
| Les.3625.1.S1_at        | L22188.1   | AT3G02885.1 | TC23715 | II  | -0.11 | 2.49  | 17.6.3   | hormone<br>metabolism.gibberelin.induced-<br>regulated-responsive-activated                            | (at3g02885): GAS5 (GAST1 PROTEIN HOMOLOG 5)                                                                                        |
| Les.827.1.S1_at         | BG626882   | AT1G74670.1 | TC23903 | II  | 0.19  | 1.05  | 17.6.3   | hormone<br>metabolism.gibberelin.induced-<br>regulated-responsive-activated                            | (at1g74670): gibberellin-responsive protein, putative                                                                              |
| LesAffx.14450.1.S1_at   | AW649659   | AT1G74670.1 | AW64965 | II  | -0.17 | 1.3   | 17.6.3   | hormone<br>metabolism.gibberelin.induced-<br>regulated-responsive-activated                            | (at1g74670): gibberellin-responsive protein, putative                                                                              |

|                       |            |             |         |     |       |       |           |                                                                                              |                                                                                                        |
|-----------------------|------------|-------------|---------|-----|-------|-------|-----------|----------------------------------------------------------------------------------------------|--------------------------------------------------------------------------------------------------------|
| Les.63.1.S1_at        | AF049900.1 | AT4G25420.1 | TC22864 | II  | 1.13  | 3.46  | 17.6.1.11 | hormone metabolism.gibberelin.synthesis-degradation.GA20 oxidase                             | (at4g25420): GA5 (GA REQUIRING 5); gibberellin 20-oxidase/ gibberellin 3-beta-dioxygenase              |
| LesAffx.16672.1.A1_at | AW625117   | AT3G63010.1 | TC23550 | VI  | -1.06 | -1.01 | 17.6.2    | hormone metabolism.gibberelin.signal transduction                                            | (at3g63010): ATGID1B/GID1B (GA INSENSITIVE DWARF1B)                                                    |
| LesAffx.67395.1.A1_at | AI490749   | AT5G27320.1 | TC23607 | VI  | -1.07 | -0.92 | 17.6.2    | hormone metabolism.gibberelin.signal transduction                                            | (at5g27320): ATGID1C/GID1C (GA INSENSITIVE DWARF1C)                                                    |
| LesAffx.9038.1.S1_at  | BI930643   | AT1G05160.1 | TC22956 | VI  | -2.54 | -2.57 | 17.6.1.4  | hormone metabolism.gibberelin.synthesis-degradation.ent-kaurenoic acid hydroxylase/oxygenase | (at1g05160): CYP88A3 (ENT-KAURENOIC ACID HYDROXYLASE 1); oxygen binding                                |
| Les.9.1.S1_at         | AB010992.1 | AT1G15550.1 | TC22813 | VI  | -2.33 | -2.34 | 17.6.1.12 | hormone metabolism.gibberelin.synthesis-degradation.GA3 oxidase                              | (at1g15550): GA4 (GA REQUIRING 4); gibberellin 3-beta-dioxygenase                                      |
| Les.3718.1.S1_at      | AF384374.1 | AT3G25780.1 | TC21922 | V   | -0.46 | -1.99 | 17.7.1.4  | hormone metabolism.jasmonate.synthesis-degradation.allene oxidase cyclase                    | (at3g25780): AOC3 (ALLENE OXIDE CYCLASE 3)                                                             |
| Les.129.1.S1_at       | AF317515.1 | AT5G42650.1 | TC21823 | III | 3.72  | 4.3   | 17.7.1.3  | hormone metabolism.jasmonate.synthesis-degradation.allene oxidase synthase                   | (at5g42650): AOS (ALLENE OXIDE SYNTHASE); hydro-lyase/ oxygen binding                                  |
| Les.3527.1.S1_at      | AY008278.1 | AT3G22400.1 | TC21750 | V   | -0.65 | -1.63 | 17.7.1.2  | hormone metabolism.jasmonate.synthesis-degradation.lipoxygenase                              | (at3g22400): lipoxygenase, putative                                                                    |
| Les.3668.1.S1_at      | U09026.1   | AT1G55020.1 | TC21838 | V   | -0.6  | -1.68 | 17.7.1.2  | hormone metabolism.jasmonate.synthesis-degradation.lipoxygenase                              | (at1g55020): LOX1 (Lipoxygenase 1); lipoxygenase                                                       |
| LesAffx.33082.1.S1_at | BG133383   | AT5G55250.1 | TC23204 | II  | 0.38  | 1.3   | 17.8.1    | hormone metabolism.salicylic acid.synthesis-degradation                                      | (at5g55250): IAMT1 (IAA CARBOXYLMETHYLTRANSFERASE 1); S-adenosylmethionine-dependent methyltransferase |
| LesAffx.69609.1.S1_at | AW929283   | AT5G04370.2 | TC23404 | V   | -0.87 | -2.99 | 17.8.1    | hormone metabolism.salicylic acid.synthesis-degradation                                      | (at5g04370): S-adenosyl-L-methionine:carboxyl methyltransferase family protein                         |
| LesAffx.29797.1.S1_at | AJ784483   | AT1G13420.1 | TC23412 | V   | -0.95 | -2.92 | 11.8      | lipid metabolism."exotics" (steroids, squalene etc)                                          | (at1g13420): sulfotransferase family protein                                                           |

|                       |            |             |         |     |       |       |          |                                                                                      |                                                                                                                                                                                                                                                                                                                                                                                                                            |
|-----------------------|------------|-------------|---------|-----|-------|-------|----------|--------------------------------------------------------------------------------------|----------------------------------------------------------------------------------------------------------------------------------------------------------------------------------------------------------------------------------------------------------------------------------------------------------------------------------------------------------------------------------------------------------------------------|
| Les.2708.1.S1_at      | BG734625   | AT4G27270.1 | TC21907 | III | 1.92  | 1.9   | 11.8     | lipid metabolism."exotics"<br>(steroids, squalene etc)                               | (at4g27270): quinone reductase family protein                                                                                                                                                                                                                                                                                                                                                                              |
| Les.3113.1.S1_at      | BG131753   | AT1G07420.1 | TC21889 | V   | -0.53 | -1.3  | 11.8.2   | lipid metabolism."exotics"<br>(steroids, squalene etc).methylsterol<br>monooxygenase | (at1g07420): SMO2-2 (sterol 4-alpha-methyl-<br>oxidase 2); C-4 methylsterol oxidase                                                                                                                                                                                                                                                                                                                                        |
| Les.3710.1.S1_at      | AJ312131.1 | AT3G25540.1 | TC21745 | III | 1.63  | 1.52  | 11.8.1   | lipid metabolism."exotics"<br>(steroids, squalene                                    | (at3g25540): LAG1 (Longevity assurance gene 1)                                                                                                                                                                                                                                                                                                                                                                             |
| LesAffx.30807.1.S1_at | AW624957   | AT2G46210.1 | AW62495 | IV  | -1.15 | -0.18 | 11.8.1   | lipid metabolism."exotics"<br>(steroids, squalene                                    | (at2g46210): delta-8 sphingolipid desaturase,<br>putative                                                                                                                                                                                                                                                                                                                                                                  |
| Les.1562.1.S1_at      | BG629310   | AT2G29980.1 | TC23006 | VI  | -1.21 | -1.4  | 11.2.3   | lipid metabolism.FA<br>desaturation.omega 3 desaturase                               | (at2g29980): FAD3 (FATTY ACID<br>DESATURASE 3); omega-3 fatty acid desaturase                                                                                                                                                                                                                                                                                                                                              |
| Les.2415.2.S1_at      | BE431455   | AT4G30950.1 | TC23842 | V   | -1.13 | -1.9  | 11.2.4   | lipid metabolism.FA<br>desaturation.omega 6 desaturase                               | (at4g30950): FAD6 (FATTY ACID<br>DESATURASE 6); omega-6 fatty acid desaturase                                                                                                                                                                                                                                                                                                                                              |
| Les.5934.1.S1_at      | AI895164   | AT3G12120.2 | TC21861 | III | 1.64  | 3     | 11.2.4   | lipid metabolism.FA<br>desaturation.omega 6 desaturase                               | (at3g12120): FAD2 (FATTY ACID<br>DESATURASE 2); delta12-fatty acid<br>dehydrogenase                                                                                                                                                                                                                                                                                                                                        |
| Les.3383.1.S1_at      | BI208081   | AT3G48990.1 | TC22532 | I   | 0.95  | 0.24  | 11.1.8   | lipid metabolism.FA synthesis and<br>FA elongation.acyl coa ligase                   | (at3g48990): AMP-dependent synthetase and<br>ligase family protein                                                                                                                                                                                                                                                                                                                                                         |
| Les.5150.1.S1_at      | BT013389.1 | AT1G77240.1 | AW92832 | VI  | -1.47 | -1.63 | 11.1.8   | lipid metabolism.FA synthesis and<br>FA elongation.acyl coa ligase                   | (at1g77240): AMP-binding protein, putative                                                                                                                                                                                                                                                                                                                                                                                 |
| Les.5293.1.S1_at      | BT013651.1 | AT2G26640.1 | AW09681 | I   | 1.03  | 0.53  | 11.1.10  | lipid metabolism.FA synthesis and<br>FA elongation.beta ketoacyl CoA<br>synthase     | (at2g26640): beta-ketoacyl-CoA synthase,<br>putative                                                                                                                                                                                                                                                                                                                                                                       |
| Les.4040.1.A1_at      | X83420.1   | AT2G26640.1 | AW09681 | III | 0.87  | 1.15  | 11.1.10  | lipid metabolism.FA synthesis and<br>FA elongation.beta ketoacyl CoA<br>synthase     | (at2g26640): beta-ketoacyl-CoA synthase,<br>putative                                                                                                                                                                                                                                                                                                                                                                       |
| LesAffx.58502.1.S1_at | BM412364   | AT2G03550.1 | TC22738 | I   | 1.34  | 0.75  | 11.9.4.5 | lipid metabolism.lipid<br>degradatation.beta-oxidation.acyl-<br>CoA thioesterase     | (at2g03550): similar to unknown protein<br>[Arabidopsis thaliana] (TAIR:AT3G48690.1);<br>similar to unknown protein [Arabidopsis thaliana]<br>(TAIR:AT3G48700.1); similar to<br>Esterase/lipase/thioesterase [Medicago<br>truncatula] (GB:ABE83378.1); contains InterPro<br>domain Esterase/lipase/thioesterase;<br>(InterPro:IPR000379); contains InterPro domain<br>Alpha/beta hydrolase fold-3;<br>(InterPro:IPR013094) |

|                       |            |             |         |     |       |       |           |                                                                        |                                                                                                                                                                                                                                                                                                            |
|-----------------------|------------|-------------|---------|-----|-------|-------|-----------|------------------------------------------------------------------------|------------------------------------------------------------------------------------------------------------------------------------------------------------------------------------------------------------------------------------------------------------------------------------------------------------|
| LesAffx.7472.2.S1_at  | AW651303   | AT2G31100.1 | TC23954 | VI  | -1.23 | -1.51 | 11.9.2    | lipid metabolism.lipid degradation.lipases                             | (at2g31100): lipase, putative                                                                                                                                                                                                                                                                              |
| LesAffx.3244.1.S1_at  | BI934720   | AT5G18640.1 | TC22222 | III | 0.92  | 1.34  | 11.9.2    | lipid metabolism.lipid degradation.lipases                             | (at5g18640): lipase class 3 family protein                                                                                                                                                                                                                                                                 |
| LesAffx.45975.1.S1_at | BI209975   | AT1G52760.1 | BI20997 | III | 1.26  | 1.09  | 11.9.2    | lipid metabolism.lipid degradation.lipases                             | (at1g52760): esterase/lipase/thioesterase family protein                                                                                                                                                                                                                                                   |
| LesAffx.6125.1.S1_at  | CK468687   | AT1G47480.1 | TC22217 | III | 1.2   | 1.1   | 11.9.3.2  | lipid metabolism.lipid degradation.lysophospholipases.carboxylesterase | (at1g47480): similar to unknown protein [Arabidopsis thaliana] (TAIR:AT3G48700.1); similar to CXE carboxylesterase [Malus pumila] (GB:ABB89003.1); contains InterPro domain Esterase/lipase/thioesterase; (InterPro:IPR000379); contains InterPro domain Alpha/beta hydrolase fold-3; (InterPro:IPR013094) |
| Les.3493.1.S1_at      | AY013255.1 | AT2G42010.1 | TC21805 | I   | 1.04  | 0.62  | 11.9.3.1  | lipid metabolism.lipid degradation.lysophospholipases.phospholipase D  | (at2g42010): PLDBETA1 (PHOSPHOLIPASE D BETA 1); phospholipase D                                                                                                                                                                                                                                            |
| Les.4710.1.S1_at      | BT014526.1 | AT1G48600.2 | TC24079 | VI  | -2.21 | -2.49 | 11.3      | lipid metabolism.Phospholipid synthesis                                | (at1g48600): phosphoethanolamine N-methyltransferase 2, putative (NMT2)                                                                                                                                                                                                                                    |
| Les.4835.1.S1_at      | BT012722.1 | AT1G73600.1 | TC24498 | VI  | -1.61 | -1.31 | 11.3      | lipid metabolism.Phospholipid synthesis                                | (at1g73600): phosphoethanolamine N-methyltransferase 3, putative (NMT3)                                                                                                                                                                                                                                    |
| Les.3526.1.S1_a_at    | AF198259.1 | AT2G20900.4 | TC22267 | I   | 1.08  | 0.74  | 11.3.5    | lipid metabolism.Phospholipid synthesis.diacylglycerol kinase          | (at2g20900): diacylglycerol kinase, putative                                                                                                                                                                                                                                                               |
| Les.3460.1.S1_at      | AF506005.1 | AT3G52600.1 | TC21723 | III | 0.76  | 1.47  | 2.2.1.3.2 | major CHO metabolism.degradation.sucrose.invertases.cell wall          | (at3g52600): ATCWINV2 (ARABIDOPSIS THALIANA CELL WALL INVERTASE 2); hydrolase, hydrolyzing O-glycosyl compounds                                                                                                                                                                                            |
| LesAffx.37983.1.S1_at | BG129477   | AT1G22650.1 | TC22731 | I   | 0.94  | 0.67  | 2.2.1.3.1 | major CHO metabolism.degradation.sucrose.invertases.neutral            | (at1g22650): beta-fructofuranosidase, putative / invertase, putative / saccharase, putative / beta-fructosidase, putative                                                                                                                                                                                  |
| Les.642.1.S1_at       | BG626672   | AT1G22650.1 | BG62667 | VI  | -1.7  | -1.29 | 2.2.1.3.1 | major CHO metabolism.degradation.sucrose.invertases.neutral            | (at1g22650): beta-fructofuranosidase, putative / invertase, putative / saccharase, putative / beta-fructosidase, putative                                                                                                                                                                                  |
| Les.3669.1.S1_at      | L19762.1   | AT5G20830.2 | TC21717 | II  | -0.05 | 1.59  | 2.2.1.5   | major CHO metabolism.degradation.sucrose.Sucrose synthase              | (at5g20830): SUS1 (SUCROSE SYNTHASE 1); UDP-glycosyltransferase/ sucrose synthase                                                                                                                                                                                                                          |

|                       |            |             |         |     |       |       |         |                                                        |                                                                                                                                                                                                                                                                                                                                 |
|-----------------------|------------|-------------|---------|-----|-------|-------|---------|--------------------------------------------------------|---------------------------------------------------------------------------------------------------------------------------------------------------------------------------------------------------------------------------------------------------------------------------------------------------------------------------------|
| Les.204.1.S1_at       | L41126.1   | AT5G48300.1 | TC21759 | VI  | -1.67 | -1.18 | 2.1.2.1 | major CHO metabolism.synthesis.starch.AGPase           | (at5g48300): ADG1 (ADP GLUCOSE PYROPHOSPHORYLASE SMALL SUBUNIT 1); glucose-1-phosphate adenylyltransferase                                                                                                                                                                                                                      |
| Les.3064.1.S1_at      | U81033.1   | AT2G21590.2 | TC21721 | VI  | -1.81 | -1.3  | 2.1.2.1 | major CHO metabolism.synthesis.starch.AGPase           | (at2g21590): APL4 (large subunit of AGP 4); glucose-1-phosphate adenylyltransferase                                                                                                                                                                                                                                             |
| LesAffx.71563.1.A1_at | AI487345   | AT5G03650.1 | TC22892 | VI  | -1.27 | -1.35 | 2.1.2.3 | major CHO metabolism.synthesis.starch.starch branching | (at5g03650): SBE2.2 (STARCH BRANCHING ENZYME 2.2)                                                                                                                                                                                                                                                                               |
| Les.1310.1.S1_at      | BT013430.1 | AT1G32900.1 | TC22042 | VI  | -1.25 | -1.8  | 2.1.2.2 | major CHO metabolism.synthesis.starch.starch synthase  | (at1g32900): starch synthase, putative                                                                                                                                                                                                                                                                                          |
| Les.3522.1.S1_at      | AF071786.3 | AT5G20280.1 | TC21714 | V   | -0.37 | -1.04 | 2.1.1.1 | major CHO metabolism.synthesis.sucrose.SPS             | (at5g20280): ATSPS1F (sucrose phosphate synthase 1F); sucrose-phosphate synthase/transferase, transferring glycosyl groups                                                                                                                                                                                                      |
| LesAffx.58193.1.A1_at | CK715571   | AT4G16120.1 | TC23961 | I   | 1.04  | 0.36  | 15      | metal handling                                         | (at4g16120): ATSEB1                                                                                                                                                                                                                                                                                                             |
| LesAffx.68294.1.S1_at | BM408981   | AT5G24580.1 | TC22580 | II  | -0.19 | 1.73  | 15.2    | metal handling.binding, chelation and storage          | (at5g24580): copper-binding family protein                                                                                                                                                                                                                                                                                      |
| LesAffx.59536.1.S1_at | BI210459   | AT3G56240.1 | TC22441 | III | 0.66  | 1.1   | 15.2    | metal handling.binding, chelation and storage          | (at3g56240): CCH (COPPER CHAPERONE)                                                                                                                                                                                                                                                                                             |
| Les.5832.1.S1_at      | BT014414.1 | AT2G36790.1 | TC22401 | VI  | -1.54 | -2.26 | 32      | micro RNA, natural antisense etc                       | MULTIPLE HITS: (at2g36800,at2g36792,at2g36790). at2g36800: DOGT1 (DON-GLUCOSYLTRANSFERASE); UDP-glycosyltransferase/transferase, transferring glycosyl groups at2g36792: other RNA at2g36790: UGT73C6 (UDP-glucoyl transferase 73C6); UDP-glycosyltransferase/UDP-glycosyltransferase/transferase, transferring glycosyl groups |
| Les.2809.1.S1_at      | BT014540.1 | AT3G46660.1 | TC24080 | V   | -0.81 | -1.77 | 32      | micro RNA, natural antisense etc                       | MULTIPLE HITS: (at3g46658,at3g46660). at3g46658: other RNA at3g46660: UDP-gluconosyl/UDP-glucoyl transferase family protein                                                                                                                                                                                                     |
| Les.3247.1.S1_at      | BT013622.1 | AT3G26380.1 | TC22319 | VI  | -1.32 | -1.03 | 3.8.2   | minor CHO metabolism.galactose.alpha-galactosidases    | (at3g26380): glycosyl hydrolase family protein 27 / alpha-galactosidase family protein / melibiase family protein                                                                                                                                                                                                               |

|                       |            |             |         |     |       |       |         |                                                                     |                                                                                                                                                        |
|-----------------------|------------|-------------|---------|-----|-------|-------|---------|---------------------------------------------------------------------|--------------------------------------------------------------------------------------------------------------------------------------------------------|
| Les.24.1.S1_at        | AF191823.1 | AT5G08370.2 | TC21735 | V   | -1.08 | -2.72 | 3.8.2   | minor CHO metabolism.galactose.alpha-galactosidases                 | (at5g08370): ATAGAL2 (ARABIDOPSIS THALIANA ALPHA-GALACTOSIDASE 2); alpha-galactosidase                                                                 |
| LesAffx.53061.1.S1_at | BI208217   | AT3G56310.2 | TC23775 | IV  | -1.46 | -0.64 | 3.8.2   | minor CHO metabolism.galactose.alpha-galactosidases                 | (at3g56310): alpha-galactosidase, putative / melibiase, putative / alpha-D-galactoside galactohydrolase, putative                                      |
| LesAffx.66966.1.S1_at | BG135649   | AT3G56310.1 | TC22051 | IV  | -1.45 | -0.87 | 3.8.2   | minor CHO metabolism.galactose.alpha-galactosidases                 | (at3g56310): alpha-galactosidase, putative / melibiase, putative / alpha-D-galactoside galactohydrolase, putative                                      |
| Les.2012.1.S1_at      | BG627650   | AT2G22240.2 | TC23373 | VI  | -1.26 | -2.08 | 3.4.3   | minor CHO metabolism.myo-inositol.InsP Synthases                    | (at2g22240): inositol-3-phosphate synthase isozyme 2 / myo-inositol-1-phosphate synthase 2 / MI-1-P synthase 2 / IPS 2                                 |
| LesAffx.68107.1.S1_at | AI485479   | AT3G28340.1 | TC23454 | III | 1.46  | 1.46  | 3.1.1.2 | minor CHO metabolism.raffinose family.galactinol synthases.putative | (at3g28340): GATL10 (Galacturonosyltransferase-like 10); polygalacturonate 4-alpha-galacturonosyltransferase/ transferase, transferring hexosyl groups |
| LesAffx.71377.1.S1_at | BG123375   | AT5G51460.2 | TC22940 | I   | 1.98  | 1.14  | 3.2.2   | minor CHO metabolism.trehalose.TPP                                  | (at5g51460): ATTPPA (Arabidopsis thaliana trehalose-6-phosphate phosphatase); trehalose-phosphatase                                                    |
| Les.2985.1.A1_at      | BG626023   | AT4G25650.1 | TC23280 | VI  | -0.9  | -1.21 | 26.3    | misc. other Ferredoxins and Rieske domain                           | (at4g25650): ACD1-LIKE; electron carrier                                                                                                               |
| LesAffx.18686.1.S1_at | BI203812   | AT1G73010.1 | TC22685 | II  | 1.11  | 2.72  | 26.13   | misc.acid and other phosphatases                                    | (at1g73010): phosphoric monoester hydrolase                                                                                                            |
| Les.3368.1.S1_at      | BT014303.1 | AT5G34850.1 | TC22868 | VI  | -1.21 | -0.91 | 26.13   | misc.acid and other phosphatases                                    | (at5g34850): ATPAP26/PAP26 (purple acid phosphatase 26); acid phosphatase/ protein serine/threonine phosphatase                                        |
| Les.3748.1.A1_at      | AB023388.1 | AT2G16430.1 | TC22967 | VI  | -1.11 | -1.29 | 26.13   | misc.acid and other phosphatases                                    | (at2g16430): PAP10; acid phosphatase/ protein serine/threonine phosphatase                                                                             |
| Les.4975.1.S1_at      | BT013032.1 | AT4G25150.1 | TC23130 | V   | -0.29 | -1.9  | 26.13   | misc.acid and other phosphatases                                    | (at4g25150): acid phosphatase, putative                                                                                                                |
| LesAffx.48215.1.S1_at | AW945008   | AT1G18650.1 | TC23968 | VI  | -1.88 | -1.4  | 26.4    | misc.beta 1,3 glucan hydrolases                                     | (at1g18650): glycosyl hydrolase family protein 17                                                                                                      |
| LesAffx.65984.1.S1_at | BG125327   | AT2G05790.1 | GO37430 | VI  | -1.64 | -1.72 | 26.4.1  | misc.beta 1,3 glucan hydrolases.glucan endo-1,3-beta-glucosidase    | (at2g05790): glycosyl hydrolase family 17 protein                                                                                                      |



|                       |            |             |         |     |       |       |        |                                                                  |                                                                                                                                                                                                                                   |
|-----------------------|------------|-------------|---------|-----|-------|-------|--------|------------------------------------------------------------------|-----------------------------------------------------------------------------------------------------------------------------------------------------------------------------------------------------------------------------------|
| Les.2923.1.S1_at      | BI925625   | AT1G32860.1 | TC23094 | IV  | -1.35 | -0.67 | 26.4.1 | misc.beta 1,3 glucan hydrolases.glucan endo-1,3-beta-glucosidase | (at1g32860): glycosyl hydrolase family 17 protein                                                                                                                                                                                 |
| LesAffx.39973.1.S1_at | BI932177   | AT5G56590.1 | DV10487 | IV  | -1.73 | -1.16 | 26.4.1 | misc.beta 1,3 glucan hydrolases.glucan endo-1,3-beta-glucosidase | (at5g56590): glycosyl hydrolase family 17 protein                                                                                                                                                                                 |
| LesAffx.22297.1.S1_at | AW041000   | AT2G28850.1 | TC21723 | I   | 1     | 0.57  | 26.1   | misc.cytochrome P450                                             | MULTIPLE HITS: (at2g28860,at2g28850). at2g28860: CYP710A4 (cytochrome P450, family 710, subfamily A, polypeptide 4); oxygen binding at2g28850: CYP710A3 (cytochrome P450, family 710, subfamily A, polypeptide 3); oxygen binding |
| Les.3792.1.S1_s_at    | AF249329.1 | AT3G14610.1 | GO37419 | VI  | -2.18 | -2.23 | 26.1   | misc.cytochrome P450                                             | (at3g14610): CYP72A7 (cytochrome P450, family 72, subfamily A, polypeptide 7); oxygen binding                                                                                                                                     |
| LesAffx.55225.1.A1_at | AJ785322   | AT5G04660.1 | TC23525 | V   | -0.43 | -1.55 | 26.1   | misc.cytochrome P450                                             | (at5g04660): CYP77A4 (cytochrome P450, family 77, subfamily A, polypeptide 4); oxygen binding                                                                                                                                     |
| LesAffx.24042.1.S1_at | CN385197   | AT3G61040.1 | DB67876 | III | 1.23  | 1.88  | 26.1   | misc.cytochrome P450                                             | (at3g61040): CYP76C7 (cytochrome P450, family 76, subfamily C, polypeptide 7); oxygen binding                                                                                                                                     |
| LesAffx.3455.1.S1_at  | BI421254   | AT5G36140.1 | TC23177 | III | 0.75  | 1.23  | 26.1   | misc.cytochrome P450                                             | (at5g36140): CYP716A2 (cytochrome P450, family 716, subfamily A, polypeptide 2); heme binding / iron ion binding / monooxygenase                                                                                                  |
| LesAffx.8720.1.S1_at  | BI921446   | AT3G52970.1 | BI92223 | III | 1.57  | 2.35  | 26.1   | misc.cytochrome P450                                             | (at3g52970): CYP76G1 (cytochrome P450, family 76, subfamily G, polypeptide 1); oxygen binding                                                                                                                                     |
| Les.4880.1.S1_at      | BT012820.1 | AT2G40890.1 | TC24340 | IV  | -1.23 | -0.02 | 26.1   | misc.cytochrome P450                                             | (at2g40890): CYP98A3 (cytochrome P450, family 98, subfamily A, polypeptide 3); p-coumarate 3-hydroxylase                                                                                                                          |
| Les.3686.1.S1_at      | AY081907.1 | AT2G39030.1 | TC21954 | I   | 0.98  | 0.41  | 26.24  | misc.GCN5-related N-acetyltransferase                            | (at2g39030): GCN5-related N-acetyltransferase (GNAT) family protein                                                                                                                                                               |
| Les.3261.1.A1_at      | BG627816   | AT4G37670.2 | TC23483 | VI  | -0.94 | -1.06 | 26.24  | misc.GCN5-related N-acetyltransferase                            | (at4g37670): GCN5-related N-acetyltransferase (GNAT) family protein / amino acid kinase family protein                                                                                                                            |

|                       |            |             |         |     |       |       |        |                                                           |                                                                                                              |
|-----------------------|------------|-------------|---------|-----|-------|-------|--------|-----------------------------------------------------------|--------------------------------------------------------------------------------------------------------------|
| Les.254.1.S1_at       | AY081905.1 | AT2G39020.1 | TC21784 | III | 1.1   | 1.31  | 26.24  | misc.GCN5-related N-acetyltransferase                     | (at2g39020): GCN5-related N-acetyltransferase (GNAT) family protein                                          |
| Les.4038.1.S1_at      | AY081908.1 | AT2G39020.1 | TC21781 | III | 2.03  | 1.88  | 26.24  | misc.GCN5-related N-acetyltransferase                     | (at2g39020): GCN5-related N-acetyltransferase (GNAT) family protein                                          |
| LesAffx.55476.1.S1_at | BM410473   | AT5G45920.1 | TC22139 | I   | 1.24  | 0.81  | 26.28  | misc.GDSL-motif lipase                                    | (at5g45920): carboxylic ester hydrolase                                                                      |
| Les.5629.1.S1_at      | BT014283.1 | AT1G29670.1 | TC24074 | V   | 0.11  | -1.08 | 26.28  | misc.GDSL-motif lipase                                    | (at1g29670): GDSL-motif lipase/hydrolase family protein                                                      |
| Les.810.1.S1_at       | BG627575   | AT5G45670.1 | TC22972 | V   | -0.71 | -2.22 | 26.28  | misc.GDSL-motif lipase                                    | (at5g45670): GDSL-motif lipase/hydrolase family protein                                                      |
| LesAffx.37344.2.S1_at | BG131634   | AT1G28590.1 | TC21881 | V   | -0.53 | -1.41 | 26.28  | misc.GDSL-motif lipase                                    | (at1g28590): lipase, putative                                                                                |
| LesAffx.26471.1.S1_at | BG126065   | AT5G03610.1 | TC22883 | IV  | -1.11 | -0.4  | 26.28  | misc.GDSL-motif lipase                                    | (at5g03610): GDSL-motif lipase/hydrolase family protein                                                      |
| Les.4966.1.S1_at      | BT013015.1 | AT4G27830.1 | BF17648 | II  | -0.07 | 1.22  | 26.3   | misc.gluco-, galacto- and mannosidases                    | (at4g27830): glycosyl hydrolase family 1 protein                                                             |
| LesAffx.65060.1.A1_at | CK716180   | AT1G61820.3 | DV10448 | VI  | -1.13 | -1.22 | 26.3   | misc.gluco-, galacto- and mannosidases                    | (at1g61820): BGLU46; hydrolase, hydrolyzing O-glycosyl compounds                                             |
| Les.1.1.S1_at         | AF154421.1 | AT3G13750.1 | TC21715 | II  | 0.42  | 2.1   | 26.3.2 | misc.gluco-, galacto- and mannosidases.beta-galactosidase | (at3g13750): BGAL1 (BETA GALACTOSIDASE 1); beta-galactosidase                                                |
| Les.4346.1.S1_at      | AF020390.2 | AT3G52840.1 | TC21717 | II  | -0.29 | 1.78  | 26.3.2 | misc.gluco-, galacto- and mannosidases.beta-galactosidase | (at3g52840): beta-galactosidase, putative / lactase, putative                                                |
| Les.110.1.S1_at       | AF154423.1 | AT2G28470.1 | TC22330 | V   | -0.81 | -1.53 | 26.3.2 | misc.gluco-, galacto- and mannosidases.beta-galactosidase | (at2g28470): BGAL8 (beta-galactosidase 8); beta-galactosidase                                                |
| Les.109.1.S1_at       | AF154424.1 | AT4G36360.2 | TC22392 | IV  | -1.11 | -0.11 | 26.3.2 | misc.gluco-, galacto- and mannosidases.beta-galactosidase | (at4g36360): BGAL3 (beta-galactosidase 3); beta-galactosidase                                                |
| Les.3491.1.S1_at      | AF077339.1 | AT4G02290.1 | TC23081 | III | 2.19  | 4.14  | 26.3.4 | misc.gluco-, galacto- and mannosidases.endoglucanase      | (at4g02290): glycosyl hydrolase family 9 protein                                                             |
| Les.3636.1.S1_at      | Y11268.1   | AT1G71380.1 | TC23558 | IV  | -1.32 | 0.12  | 26.3.4 | misc.gluco-, galacto- and mannosidases.endoglucanase      | (at1g71380): glycosyl hydrolase family 9 protein                                                             |
| Les.68.2.S1_a_at      | BT013727.1 | AT4G11050.1 | TC21796 | IV  | -2.14 | -1.07 | 26.3.4 | misc.gluco-, galacto- and mannosidases.endoglucanase      | (at4g11050): endo-1,4-beta-glucanase, putative / cellulase, putative                                         |
| Les.3735.1.S1_at      | AY007561.1 | AT2G29460.1 | TC22594 | II  | 1.54  | 3.19  | 26.9   | misc.glutathione S transferases                           | (at2g29460): ATGSTU4 (GLUTATHIONE S-TRANSFERASE 22); glutathione transferase                                 |
| Les.4501.1.S1_at      | CK468710   | AT3G09270.1 | TC24359 | II  | 0.42  | 1.32  | 26.9   | misc.glutathione S transferases                           | (at3g09270): ATGSTU8 (Arabidopsis thaliana Glutathione S-transferase (class tau) 8); glutathione transferase |
| Les.1724.1.S1_at      | AI780669   | AT5G02790.1 | TC22140 | V   | 0.16  | -1.06 | 26.9   | misc.glutathione S transferases                           | (at5g02790): In2-1 protein, putative                                                                         |

|                       |            |             |         |     |       |       |       |                                                                                            |                                                                                                       |
|-----------------------|------------|-------------|---------|-----|-------|-------|-------|--------------------------------------------------------------------------------------------|-------------------------------------------------------------------------------------------------------|
| LesAffx.57363.1.S1_at | AW035806   | AT1G14550.1 | TC21958 | III | 1.68  | 2.09  | 26.9  | misc.glutathione S transferases                                                            | (at1g14550): anionic peroxidase, putative                                                             |
| Les.4287.1.S1_at      | CB751564   | AT5G62360.1 | TC21784 | III | 2.48  | 3.31  | 26.18 | misc.invertase/pectin methyltransferase inhibitor family protein                           | (at5g62360): invertase/pectin methyltransferase inhibitor family protein                              |
| LesAffx.58019.1.S1_at | BI929233   | AT5G20740.1 | TC22171 | IV  | -1.47 | -0.17 | 26.18 | misc.invertase/pectin methyltransferase inhibitor family protein                           | (at5g20740): invertase/pectin methyltransferase inhibitor family protein                              |
| LesAffx.70112.1.S1_at | AW092445   | AT4G37560.1 | TC22090 | VI  | -0.84 | -1.31 | 26.1  | misc.misc2                                                                                 | (at4g37560): formamidase, putative / formamide amidohydrolase, putative                               |
| LesAffx.29757.2.S1_at | AI898522   | AT5G64250.1 | TC23303 | III | 0.77  | 1     | 26.1  | misc.misc2                                                                                 | (at5g64250): 2-nitropropane dioxygenase family / NPD family                                           |
| Les.1465.1.S1_at      | BG631822   | AT5G64440.1 | TC23566 | VI  | -1.42 | -2.16 | 26.8  | misc.nitrilases, *nitrile lyases, berberine bridge enzymes, reticuline oxidases, troponine | (at5g64440): amidase family protein                                                                   |
| LesAffx.21101.1.S1_at | BI924446   | AT1G72970.1 | TC21935 | V   | -0.85 | -1.89 | 26.8  | misc.nitrilases, *nitrile lyases, berberine bridge enzymes, reticuline oxidases, troponine | (at1g72970): HTH (HOTHEAD); aldehyde-lyase                                                            |
| LesAffx.58326.1.A1_at | CD002272   | AT2G23620.1 | TC23714 | III | 1.35  | 1.88  | 26.8  | misc.nitrilases, *nitrile lyases, berberine bridge enzymes, reticuline oxidases, troponine | (at2g23620): esterase, putative                                                                       |
| LesAffx.58497.1.S1_at | BM411367   | AT1G19250.1 | TC23480 | I   | 1.73  | 1.29  | 26.7  | misc.oxidases - copper, flavone etc.                                                       | (at1g19250): FMO1 (FLAVIN-DEPENDENT MONOOXYGENASE 1); monooxygenase                                   |
| LesAffx.44382.1.S1_at | BI921407   | AT1G21850.1 | GO37430 | II  | 0.3   | 1.13  | 26.7  | misc.oxidases - copper, flavone etc.                                                       | (at1g21850): SKS8 (SKU5 Similar 8); copper ion binding / oxidoreductase                               |
| Les.1478.1.S1_at      | BG631500   | AT1G23740.1 | TC23304 | V   | -0.97 | -2.05 | 26.7  | misc.oxidases - copper, flavone etc.                                                       | (at1g23740): oxidoreductase, zinc-binding dehydrogenase family protein                                |
| LesAffx.54536.1.S1_at | BM409044   | AT2G29720.1 | TC23408 | III | 1.84  | 1.58  | 26.7  | misc.oxidases - copper, flavone etc.                                                       | MULTIPLE HITS: (at2g35660,at2g29720). at2g35660: CTF2A; monooxygenase at2g29720: CTF2B; monooxygenase |
| LesAffx.32563.1.S1_at | AI778206   | AT1G14130.1 | TC22260 | IV  | -1.17 | -0.13 | 26.7  | misc.oxidases - copper, flavone etc.                                                       | (at1g14130): 2-oxoglutarate-dependent dioxygenase, putative                                           |
| Les.252.1.S1_at       | U35643.1   | AT1G73680.1 | DB68734 | VI  | -1.65 | -1.14 | 26.14 | misc.oxygenases                                                                            | (at1g73680): pathogen-responsive alpha-dioxygenase, putative                                          |
| Les.4999.1.A1_at      | BT013077.1 | AT2G37130.1 | TC23341 | I   | 1.41  | 1.01  | 26.12 | misc.peroxidases                                                                           | (at2g37130): peroxidase 21 (PER21) (P21) (PRXR5)                                                      |
| Les.2832.1.S1_at      | CN384480   | AT2G41480.1 | TC21748 | II  | -0.62 | 1.26  | 26.12 | misc.peroxidases                                                                           | (at2g41480): peroxidase                                                                               |

|                         |            |             |         |     |       |       |       |                                                                                  |                                                                                          |
|-------------------------|------------|-------------|---------|-----|-------|-------|-------|----------------------------------------------------------------------------------|------------------------------------------------------------------------------------------|
| Les.4976.1.S1_at        | BT013033.1 | AT4G36430.1 | TC22335 | II  | 0.16  | 1.5   | 26.12 | misc.peroxidases                                                                 | (at4g36430): peroxidase, putative                                                        |
| LesAffx.39.1.S1_at      | CN385433   | AT4G36430.1 | TC22335 | II  | -1    | 1.34  | 26.12 | misc.peroxidases                                                                 | (at4g36430): peroxidase, putative                                                        |
| LesAffx.39466.1.S1_at   | BI203178   | AT5G42180.1 | TC24216 | II  | 0.8   | 2.01  | 26.12 | misc.peroxidases                                                                 | (at5g42180): peroxidase 64 (PER64) (P64) (PRXR4)                                         |
| LesAffx.6103.1.S1_at    | AW647641   | AT3G21770.1 | TC22739 | II  | 0.08  | 1.22  | 26.12 | misc.peroxidases                                                                 | (at3g21770): peroxidase 30 (PER30) (P30) (PRXR9)                                         |
| LesAffx.66953.1.S1_at   | AW651552   | AT2G18980.1 | TC23604 | III | 0.71  | 1.22  | 26.12 | misc.peroxidases                                                                 | (at2g18980): peroxidase, putative                                                        |
| LesAffx.71606.1.S1_s_at | AI896002   | AT2G37130.2 | TC24027 | III | 1.51  | 1.34  | 26.12 | misc.peroxidases                                                                 | (at2g37130): peroxidase 21 (PER21) (P21) (PRXR5)                                         |
| Les.2092.1.S1_at        | BG626759   | AT4G21960.1 | TC22657 | IV  | -1.84 | -0.79 | 26.12 | misc.peroxidases                                                                 | (at4g21960): PRXR1 (peroxidase 42); peroxidase                                           |
| LesAffx.53517.1.S1_at   | AI773309   | AT1G71695.1 | TC23424 | IV  | -1.11 | -0.6  | 26.12 | misc.peroxidases                                                                 | (at1g71695): peroxidase 12 (PER12) (P12) (PRXR6)                                         |
| Les.4988.1.S1_at        | BT013056.1 | AT1G72230.1 | TC22946 | V   | 0.11  | -2.12 | 26.19 | misc.plastocyanin-like                                                           | (at1g72230): plastocyanin-like domain-containing protein                                 |
| Les.217.1.S1_at         | AF243180.1 | AT5G26330.1 | TC22069 | III | 1.23  | 1.56  | 26.19 | misc.plastocyanin-like                                                           | (at5g26330): plastocyanin-like domain-containing protein / mavicyanin, putative          |
| Les.5523.1.S1_at        | BT014071.1 | AT5G15350.1 | TC21750 | III | 0.79  | 1.01  | 26.19 | misc.plastocyanin-like                                                           | (at5g15350): plastocyanin-like domain-containing protein                                 |
| Les.3094.3.S1_at        | BG125458   | AT2G45180.1 | TC23596 | VI  | -1.28 | -1.75 | 26.21 | misc.protease inhibitor/seed storage/lipid transfer protein (LTP) family protein | (at2g45180): protease inhibitor/seed storage/lipid transfer protein (LTP) family protein |
| Les.4312.2.S1_at        | BG626083   | AT2G45180.1 | TC22795 | VI  | -1.72 | -2.43 | 26.21 | misc.protease inhibitor/seed storage/lipid transfer protein (LTP) family protein | (at2g45180): protease inhibitor/seed storage/lipid transfer protein (LTP) family protein |
| LesAffx.17924.1.S1_at   | BG124217   | AT5G64080.1 | TC24101 | VI  | -1.34 | -1.04 | 26.21 | misc.protease inhibitor/seed storage/lipid transfer protein (LTP) family protein | (at5g64080): protease inhibitor/seed storage/lipid transfer protein (LTP) family protein |
| Les.2642.1.S1_at        | CN384581   | AT3G18280.1 | TC22309 | III | 0.76  | 1.49  | 26.21 | misc.protease inhibitor/seed storage/lipid transfer protein (LTP) family protein | (at3g18280): protease inhibitor/seed storage/lipid transfer protein (LTP) family protein |
| Les.5759.1.S1_at        | BM956714   | AT1G62790.1 | TC22993 | III | 1.56  | 2.61  | 26.21 | misc.protease inhibitor/seed storage/lipid transfer protein (LTP) family protein | (at1g62790): protease inhibitor/seed storage/lipid transfer protein (LTP) family protein |
| LesAffx.124.1.S1_at     | AW443936   | AT5G48485.1 | TC23232 | III | 1.43  | 1.55  | 26.21 | misc.protease inhibitor/seed storage/lipid transfer protein (LTP) family protein | (at5g48485): DIR1 (DEFECTIVE IN INDUCED RESISTANCE 1); lipid binding                     |

|                       |            |             |         |     |       |       |       |                                                                                  |                                                                                                                                                                                                       |
|-----------------------|------------|-------------|---------|-----|-------|-------|-------|----------------------------------------------------------------------------------|-------------------------------------------------------------------------------------------------------------------------------------------------------------------------------------------------------|
| LesAffx.67592.1.S1_at | AW093105   | AT3G22600.1 | TC22664 | III | 3.48  | 4.23  | 26.21 | misc.protease inhibitor/seed storage/lipid transfer protein (LTP) family protein | (at3g22600): protease inhibitor/seed storage/lipid transfer protein (LTP) family protein                                                                                                              |
| Les.1046.1.S1_at      | X72730.1   | AT3G55290.2 | TC22785 | I   | 1.96  | 1.28  | 26.22 | misc.short chain dehydrogenase/reductase (SDR)                                   | MULTIPLE HITS: (at3g55310,at3g55290). at3g55310: oxidoreductase at3g55290: short-chain dehydrogenase/reductase (SDR) family                                                                           |
| LesAffx.1091.1.S1_at  | BI933005   | AT5G18210.1 | TC22991 | I   | 1.19  | 0.94  | 26.22 | misc.short chain dehydrogenase/reductase (SDR)                                   | (at5g18210): short-chain dehydrogenase/reductase (SDR) family protein                                                                                                                                 |
| Les.2325.1.S1_at      | BG625896   | AT2G47140.1 | TC22401 | VI  | -1.41 | -0.96 | 26.22 | misc.short chain dehydrogenase/reductase (SDR)                                   | (at2g47140): short-chain dehydrogenase/reductase (SDR) family protein                                                                                                                                 |
| LesAffx.50687.1.S1_at | AI773710   | AT5G18210.1 | TC22384 | III | 1.95  | 1.75  | 26.22 | misc.short chain dehydrogenase/reductase (SDR)                                   | (at5g18210): short-chain dehydrogenase/reductase (SDR) family protein                                                                                                                                 |
| LesAffx.15898.1.S1_at | AW649847   | AT2G43820.1 | TC21728 | I   | 1.02  | 0.31  | 26.2  | misc.UDP glucosyl and glucuronyl transferases                                    | (at2g43820): GT/UGT74F2 (UDP-GLUCOSYLTRANSFERASE 74F2); UDP-glucosyltransferase/ UDP-glycosyltransferase/ transferase, transferring glycosyl groups / transferase, transferring hexosyl groups        |
| LesAffx.32379.1.S1_at | BI421517   | AT3G50760.1 | BI42151 | I   | 1.19  | 0.66  | 26.2  | misc.UDP glucosyl and glucuronyl transferases                                    | (at3g50760): GATL2 (Galacturonosyltransferase-like 2); polygalacturonate 4-alpha-galacturonosyltransferase/ transferase, transferring glycosyl groups / transferase, transferring hexosyl groups      |
| LesAffx.63776.1.S1_at | BM408779   | AT5G17050.1 | TC22982 | V   | -0.47 | -1.45 | 26.2  | misc.UDP glucosyl and glucuronyl transferases                                    | (at5g17050): UDP-glucuronosyl/UDP-glucosyl transferase family protein                                                                                                                                 |
| LesAffx.59059.1.S1_at | AW622913   | AT1G70090.2 | TC22426 | III | 1.29  | 1.13  | 26.2  | misc.UDP glucosyl and glucuronyl transferases                                    | (at1g70090): GATL9/LGT8 (Galacturonosyltransferase-like 9); polygalacturonate 4-alpha-galacturonosyltransferase/ transferase, transferring glycosyl groups / transferase, transferring hexosyl groups |
| Les.3069.1.S1_at      | BG630752   | AT2G22900.1 | TC21938 | IV  | -1.99 | -0.64 | 26.2  | misc.UDP glucosyl and glucuronyl transferases                                    | (at2g22900): galactosyl transferase GMA12/MNN10 family protein                                                                                                                                        |
| Les.4222.1.S1_at      | AY034149.1 | AT1G32350.1 | TC21756 | I   | 1.93  | 1.52  | 9.4   | mitochondrial electron transport / ATP synthesis.alternative oxidase             | (at1g32350): AOX1D (ALTERNATIVE OXIDASE 1D); alternative oxidase                                                                                                                                      |
| Les.4223.1.S1_at      | AY034148.1 | AT3G22360.1 | TC21729 | I   | 1.52  | 0.81  | 9.4   | mitochondrial electron transport / ATP synthesis.alternative oxidase             | (at3g22360): AOX1B (alternative oxidase 1B); alternative oxidase                                                                                                                                      |

|                       |            |             |         |     |       |       |        |                                                                                 |                                                                                                                                                                                                                                                                                                                                                                                                                                                                                                     |
|-----------------------|------------|-------------|---------|-----|-------|-------|--------|---------------------------------------------------------------------------------|-----------------------------------------------------------------------------------------------------------------------------------------------------------------------------------------------------------------------------------------------------------------------------------------------------------------------------------------------------------------------------------------------------------------------------------------------------------------------------------------------------|
| LesAffx.9245.1.S1_at  | BE463039   | AT3G52730.1 | TC24138 | III | 1.03  | 0.95  | 9.5    | mitochondrial electron transport / ATP synthesis.cytochrome c reductase         | (at3g52730): ubiquinol-cytochrome C reductase UQCRX/QCR9-like family protein                                                                                                                                                                                                                                                                                                                                                                                                                        |
| Les.4625.1.S1_at      | BT013972.1 | AT1G50940.1 | AW03556 | III | 0.91  | 1.48  | 9.3    | mitochondrial electron transport / ATP synthesis.electron transfer flavoprotein | (at1g50940): ETFALPHA (ELECTRON TRANSFER FLAVOPROTEIN ALPHA); FAD binding / electron carrier                                                                                                                                                                                                                                                                                                                                                                                                        |
| Les.5350.1.A1_at      | BT013752.1 | AT4G28220.1 | TC22353 | VI  | -0.91 | -1.11 | 9.2.2  | mitochondrial electron transport / ATP synthesis.NADH-DH.type II.external       | (at4g28220): NDB1 (NAD(P)H DEHYDROGENASE B1); NADH dehydrogenase/ disulfide oxidoreductase                                                                                                                                                                                                                                                                                                                                                                                                          |
| Les.224.1.A1_at       | AJ277561.1 | AT5G37600.1 | TC21885 | V   | -0.57 | -1.17 | 12.2.2 | N-metabolism.ammonia metabolism.glutamine synthase                              | (at5g37600): ATGSR1 (Arabidopsis thaliana glutamine synthase clone R1); glutamate-ammonia ligase                                                                                                                                                                                                                                                                                                                                                                                                    |
| LesAffx.17150.1.A1_at | AW039265   | AT2G15620.1 | TC23237 | VI  | -0.78 | -1.2  | 12.1.2 | N-metabolism.nitrate metabolism.nitrite reductase                               | (at2g15620): NIR1 (NITRITE REDUCTASE); ferredoxin-nitrate reductase                                                                                                                                                                                                                                                                                                                                                                                                                                 |
| LesAffx.46085.1.S1_at | AW928724   | AT5G25180.1 | TC22038 | VI  | -2.09 | -2.35 | 35.3   | not assigned.disagreeing hits                                                   | MULTIPLE DISAGREEING HITS: (at5g25180,at5g25170). at5g25180: CYP71B14 (cytochrome P450, family 71, subfamily B, polypeptide 14); oxygen binding at5g25170: similar to unknown protein [Arabidopsis thaliana] (TAIR:AT2G25190.1); similar to hypothetical protein 25.t00041 [Brassica oleracea] (GB:ABD64953.1); similar to Os03g0198500 [Oryza sativa (japonica cultivar-group)] (GB:NP_001049279.1); contains InterPro domain Protein of unknown function DUF862, eukaryotic; (InterPro:IPR008580) |
| LesAffx.34363.1.S1_at | BE461912   | AT4G38300.1 | TC24206 | I   | 1.21  | 0.74  | 35.1   | not assigned.no ontology                                                        | MULTIPLE HITS: (at4g38300,at4g38650). at4g38300: glycosyl hydrolase family 10 protein at4g38650: glycosyl hydrolase family 10 protein                                                                                                                                                                                                                                                                                                                                                               |
| LesAffx.47116.1.S1_at | AW224087   | AT5G40670.1 | TC23403 | I   | 1.33  | 1     | 35.1   | not assigned.no ontology                                                        | (at5g40670): PQ-loop repeat family protein / transmembrane family protein                                                                                                                                                                                                                                                                                                                                                                                                                           |
| LesAffx.47529.1.S1_at | BG131749   | AT1G68260.1 | TC24163 | I   | 1     | 0.61  | 35.1   | not assigned.no ontology                                                        | (at1g68260): thioesterase family protein                                                                                                                                                                                                                                                                                                                                                                                                                                                            |
| LesAffx.63739.1.S1_at | AW033134   | AT2G18360.1 | TC21965 | I   | 1.16  | 0.81  | 35.1   | not assigned.no ontology                                                        | (at2g18360): hydrolase, alpha/beta fold family protein                                                                                                                                                                                                                                                                                                                                                                                                                                              |
| LesAffx.68306.1.S1_at | BE461086   | AT5G63130.1 | TC23074 | I   | 3.31  | 1.88  | 35.1   | not assigned.no ontology                                                        | (at5g63130): octicosapeptide/Phox/Bem1p (PB1) domain-containing protein                                                                                                                                                                                                                                                                                                                                                                                                                             |

|                       |            |             |         |    |       |       |      |                          |                                                                                                                                                                                                                                                                                                                                                                                                                                                                                                                                           |
|-----------------------|------------|-------------|---------|----|-------|-------|------|--------------------------|-------------------------------------------------------------------------------------------------------------------------------------------------------------------------------------------------------------------------------------------------------------------------------------------------------------------------------------------------------------------------------------------------------------------------------------------------------------------------------------------------------------------------------------------|
| Les.4254.1.S1_at      | BG631257   | AT1G16880.1 | TC24002 | II | 0.35  | 1.11  | 35.1 | not assigned.no ontology | (at1g16880): uridylyltransferase-related                                                                                                                                                                                                                                                                                                                                                                                                                                                                                                  |
| Les.5567.1.S1_at      | BT014164.1 | AT3G05170.1 | TC22700 | II | 0.11  | 0.97  | 35.1 | not assigned.no ontology | (at3g05170):<br>phosphoglycerate/bisphosphoglycerate mutase<br>family protein                                                                                                                                                                                                                                                                                                                                                                                                                                                             |
| LesAffx.17773.1.S1_at | BF113622   | AT2G32150.1 | DB69166 | II | 0.18  | 1.11  | 35.1 | not assigned.no ontology | (at2g32150): haloacid dehalogenase-like<br>hydrolase family protein                                                                                                                                                                                                                                                                                                                                                                                                                                                                       |
| LesAffx.344.10.S1_at  | AI773570   | AT2G04690.2 | AI77357 | II | 0.6   | 1.48  | 35.1 | not assigned.no ontology | (at2g04690): cellular repressor of E1A-stimulated<br>genes (CREG) family                                                                                                                                                                                                                                                                                                                                                                                                                                                                  |
| LesAffx.53053.1.S1_at | BI211180   | AT1G76160.1 | TC22538 | II | 0.46  | 0.98  | 35.1 | not assigned.no ontology | (at1g76160): SKS5 (SKU5 Similar 5); copper ion<br>binding / oxidoreductase                                                                                                                                                                                                                                                                                                                                                                                                                                                                |
| Les.4825.1.S1_at      | BT012681.1 | AT5G34940.1 | TC22418 | VI | -1.18 | -0.89 | 35.1 | not assigned.no ontology | (at5g34940): glycosyl hydrolase family 79 N-<br>terminal domain-containing protein                                                                                                                                                                                                                                                                                                                                                                                                                                                        |
| Les.5255.1.S1_at      | BT013579.1 | AT1G21680.1 | BP87874 | VI | -1.11 | -0.82 | 35.1 | not assigned.no ontology | (at1g21680): similar to unknown protein<br>[Arabidopsis thaliana] (TAIR:AT1G21670.1);<br>similar to WD40 domain protein beta Propeller<br>[Solibacter usitatus Ellin6076]<br>(GB:YP_828764.1); similar to Os03g0840200<br>[Oryza sativa (japonica cultivar-group)]<br>(GB:NP_001051846.1); similar to<br>Os07g0638100 [Oryza sativa (japonica cultivar-<br>group)] (GB:NP_001060406.1); contains<br>InterPro domain TolB, C-terminal;<br>(InterPro:IPR011042); contains InterPro domain<br>WD40-like Beta Propeller; (InterPro:IPR011659) |
| Les.5786.1.S1_at      | BT014563.1 | AT3G05900.1 | TC22614 | VI | -1.25 | -1.01 | 35.1 | not assigned.no ontology | (at3g05900): neurofilament protein-related                                                                                                                                                                                                                                                                                                                                                                                                                                                                                                |
| Les.5861.1.S1_at      | BF050616   | AT5G16730.1 | TC24194 | VI | -0.96 | -1.19 | 35.1 | not assigned.no ontology | (at5g16730): similar to unknown protein<br>[Arabidopsis thaliana] (TAIR:AT3G02930.1);<br>similar to Protein kinase PKN/PRK1, effector<br>[Medicago truncatula] (GB:ABE94710.1);<br>contains InterPro domain Protein kinase<br>PKN/PRK1, effector; (InterPro:IPR011072)                                                                                                                                                                                                                                                                    |
| LesAffx.58110.1.A1_at | AJ785349   | AT1G78070.2 | BE43527 | VI | -1.24 | -1.49 | 35.1 | not assigned.no ontology | (at1g78070): WD-40 repeat family protein                                                                                                                                                                                                                                                                                                                                                                                                                                                                                                  |
| Les.3166.1.S1_at      | AI775188   | AT1G12570.1 | TC23957 | V  | -0.29 | -1.77 | 35.1 | not assigned.no ontology | (at1g12570): glucose-methanol-choline (GMC)<br>oxidoreductase family protein                                                                                                                                                                                                                                                                                                                                                                                                                                                              |
| Les.3924.1.S1_at      | BE433308   | AT2G14520.1 | TC23702 | V  | -0.26 | -1.82 | 35.1 | not assigned.no ontology | (at2g14520): CBS domain-containing protein                                                                                                                                                                                                                                                                                                                                                                                                                                                                                                |
| Les.5301.1.S1_at      | BI204978   | AT1G59650.1 | TC22541 | V  | -0.56 | -1.15 | 35.1 | not assigned.no ontology | (at1g59650): CW14                                                                                                                                                                                                                                                                                                                                                                                                                                                                                                                         |

|                       |            |             |         |     |       |       |      |                          |                                                                                                                                                                                                                                                                                                                                                    |
|-----------------------|------------|-------------|---------|-----|-------|-------|------|--------------------------|----------------------------------------------------------------------------------------------------------------------------------------------------------------------------------------------------------------------------------------------------------------------------------------------------------------------------------------------------|
| LesAffx.10091.1.S1_at | AI487223   | AT1G24420.1 | TC23911 | V   | -0.47 | -2.93 | 35.1 | not assigned.no ontology | (at1g24420): transferase family protein                                                                                                                                                                                                                                                                                                            |
| LesAffx.37212.1.A1_at | AI491145   | AT1G73480.1 | TC23069 | V   | -0.71 | -2.74 | 35.1 | not assigned.no ontology | (at1g73480): hydrolase, alpha/beta fold family protein                                                                                                                                                                                                                                                                                             |
| LesAffx.41703.1.A1_at | BG352060   | AT4G35250.1 | TC23987 | V   | -0.17 | -1.22 | 35.1 | not assigned.no ontology | (at4g35250): vestitone reductase-related                                                                                                                                                                                                                                                                                                           |
| LesAffx.5.1.S1_at     | AW621769   | AT1G42470.1 | TC22795 | V   | -0.76 | -1.46 | 35.1 | not assigned.no ontology | (at1g42470): patched family protein                                                                                                                                                                                                                                                                                                                |
| LesAffx.65757.1.S1_at | AW624713   | AT4G13840.1 | TC21840 | V   | -0.34 | -1.2  | 35.1 | not assigned.no ontology | (at4g13840): transferase family protein                                                                                                                                                                                                                                                                                                            |
| Les.2565.1.S1_at      | AW441199   | AT2G25110.1 | TC23474 | III | 0.66  | 1.01  | 35.1 | not assigned.no ontology | (at2g25110): MIR domain-containing protein                                                                                                                                                                                                                                                                                                         |
| Les.5014.1.S1_at      | BT013105.1 | AT4G14420.1 | TC23486 | III | 1.37  | 1.69  | 35.1 | not assigned.no ontology | (at4g14420): lesion inducing protein-related                                                                                                                                                                                                                                                                                                       |
| Les.5481.1.A1_at      | BT014001.1 | AT4G14420.1 | TC21763 | III | 1     | 0.87  | 35.1 | not assigned.no ontology | (at4g14420): lesion inducing protein-related                                                                                                                                                                                                                                                                                                       |
| LesAffx.30145.1.S1_at | AI775220   | AT1G68610.1 | ES89125 | III | 1.43  | 1.51  | 35.1 | not assigned.no ontology | (at1g68610): similar to unknown protein [Arabidopsis thaliana] (TAIR:AT1G14870.1); similar to PGPS/D12 [Petunia x hybrida] (GB:AAD02554.1); contains InterPro domain Protein of unknown function Cys-rich; (InterPro:IPR006461)                                                                                                                    |
| LesAffx.49809.1.S1_at | CN384734   | AT5G59480.1 | TC21755 | III | 0.79  | 1.22  | 35.1 | not assigned.no ontology | (at5g59480): haloacid dehalogenase-like hydrolase family protein                                                                                                                                                                                                                                                                                   |
| LesAffx.56301.1.S1_at | AI895341   | AT2G22170.1 | TC22182 | III | 2.26  | 2.31  | 35.1 | not assigned.no ontology | (at2g22170): lipid-associated family protein                                                                                                                                                                                                                                                                                                       |
| LesAffx.62967.1.S1_at | BG128004   | AT3G52470.1 | TC21896 | III | 1.02  | 0.97  | 35.1 | not assigned.no ontology | (at3g52470): harpin-induced family protein / HIN1 family protein / harpin-responsive family protein                                                                                                                                                                                                                                                |
| LesAffx.63489.1.S1_at | BI921137   | AT4G15470.1 | TC22082 | III | 2.75  | 2.87  | 35.1 | not assigned.no ontology | (at4g15470): similar to glutamate binding [Arabidopsis thaliana] (TAIR:AT1G03070.1); similar to Os05g0402300 [Oryza sativa (japonica cultivar-group)] (GB:NP_001055493.1); similar to putative receptor associated protein [Capsicum chinense] (GB:CAI53895.2); contains InterPro domain Protein of unknown function UPF0005; (InterPro:IPR006214) |
| LesAffx.69783.1.S1_at | AW220917   | AT3G55390.1 | TC23448 | III | 1.65  | 1.78  | 35.1 | not assigned.no ontology | (at3g55390): integral membrane family protein                                                                                                                                                                                                                                                                                                      |



|                       |            |             |         |     |       |       |         |                                                                       |                                                                                                                                                                                                                                                                                                                                                                                                                         |
|-----------------------|------------|-------------|---------|-----|-------|-------|---------|-----------------------------------------------------------------------|-------------------------------------------------------------------------------------------------------------------------------------------------------------------------------------------------------------------------------------------------------------------------------------------------------------------------------------------------------------------------------------------------------------------------|
| LesAffx.8850.1.S1_at  | AW034398   | AT5G62180.1 | TC22181 | III | 2.49  | 4.74  | 35.1    | not assigned.no ontology                                              | (at5g62180): similar to unknown protein [Arabidopsis thaliana] (TAIR:AT2G45600.1); similar to CXE carboxylesterase [Actinidia arguta] (GB:ABB89014.1); contains InterPro domain Esterase/lipase/thioesterase; (InterPro:IPR000379); contains InterPro domain Alpha/beta hydrolase fold-3; (InterPro:IPR013094)                                                                                                          |
| Les.2626.1.S1_at      | BG735008   | AT4G39730.1 | TC22245 | IV  | -1.38 | -0.07 | 35.1    | not assigned.no ontology                                              | (at4g39730): lipid-associated family protein                                                                                                                                                                                                                                                                                                                                                                            |
| Les.3819.1.S1_at      | AY140893.1 | AT2G18500.1 | TC21842 | IV  | -1.23 | -0.06 | 35.1    | not assigned.no ontology                                              | (at2g18500): ATOFP7/OF7 (Arabidopsis thaliana ovate family protein 7)                                                                                                                                                                                                                                                                                                                                                   |
| Les.5263.1.S1_at      | BT013600.1 | AT1G76160.1 | TC22756 | IV  | -1.08 | -0.68 | 35.1    | not assigned.no ontology                                              | (at1g76160): SKS5 (SKU5 Similar 5); copper ion binding / oxidoreductase                                                                                                                                                                                                                                                                                                                                                 |
| Les.5333.1.S1_at      | BT013726.1 | AT1G28340.1 | TC22354 | IV  | -1.45 | -0.57 | 35.1    | not assigned.no ontology                                              | (at1g28340): leucine-rich repeat family protein                                                                                                                                                                                                                                                                                                                                                                         |
| Les.5664.1.S1_at      | BT014348.1 | AT5G51550.1 | AW03195 | IV  | -2.6  | 0.63  | 35.1    | not assigned.no ontology                                              | (at5g51550): phosphate-responsive 1 family protein                                                                                                                                                                                                                                                                                                                                                                      |
| LesAffx.10346.1.A1_at | CK715067   | AT4G22290.1 | TC22642 | IV  | -1.18 | -0.69 | 35.1    | not assigned.no ontology                                              | MULTIPLE HITS: (at4g22285,at4g22350). at4g22285: ubiquitin thioesterase/ zinc ion binding at4g22350: ubiquitin carboxyl-terminal hydrolase family protein                                                                                                                                                                                                                                                               |
| LesAffx.39072.1.S1_at | BI211118   | AT1G60670.2 | TC22430 | IV  | -1.27 | -0.8  | 35.1    | not assigned.no ontology                                              | (at1g60670): similar to unknown protein [Arabidopsis thaliana] (TAIR:AT1G10820.2); similar to Os04g0523100 [Oryza sativa (japonica cultivar-group)] (GB:NP_001053344.1); similar to H0322F07.7 [Oryza sativa (indica cultivar-group)] (GB:CAH67770.1); similar to OSIGBa0153E02-OSIGBa0093120.5 [Oryza sativa (indica cultivar-group)] (GB:CAH67876.1); contains InterPro domain Homeodomain-like; (InterPro:IPR009057) |
| LesAffx.67955.1.S1_at | BM409816   | AT4G16490.1 | TC24493 | VI  | -0.8  | -1.21 | 35.1.3  | not assigned.no ontology.armadillo/beta-catenin repeat family protein | (at4g16490): armadillo/beta-catenin repeat family protein                                                                                                                                                                                                                                                                                                                                                               |
| Les.4852.1.S1_at      | BT012761.1 | AT1G63220.1 | TC22901 | III | 1.18  | 1.45  | 35.1.19 | not assigned.no ontology.C2 domain-containing protein                 | (at1g63220): C2 domain-containing protein                                                                                                                                                                                                                                                                                                                                                                               |

|                       |          |             |         |     |       |       |         |                                                                            |                                                                                                                                                                                                                                                                                                                                                                                                                          |
|-----------------------|----------|-------------|---------|-----|-------|-------|---------|----------------------------------------------------------------------------|--------------------------------------------------------------------------------------------------------------------------------------------------------------------------------------------------------------------------------------------------------------------------------------------------------------------------------------------------------------------------------------------------------------------------|
| Les.3591.1.S1_at      | CN385613 | AT4G33930.1 | FS19591 | II  | 0.44  | 1.23  | 35.1.40 | not assigned.no ontology.glycine rich proteins                             | MULTIPLE HITS: (at4g34300,at4g33930). at4g34300: glycine-rich protein at4g33930: glycine-rich protein                                                                                                                                                                                                                                                                                                                    |
| LesAffx.51285.1.A1_at | CN385118 | AT2G15780.1 | TC24451 | III | 1.01  | 1.09  | 35.1.40 | not assigned.no ontology.glycine rich proteins                             | (at2g15780): glycine-rich protein                                                                                                                                                                                                                                                                                                                                                                                        |
| LesAffx.31451.1.S1_at | BM409478 | AT3G53170.1 | TC22107 | VI  | -1.17 | -1.12 | 35.1.5  | not assigned.no ontology.pentatricopeptide (PPR) repeat-containing protein | (at3g53170): pentatricopeptide (PPR) repeat-containing protein                                                                                                                                                                                                                                                                                                                                                           |
| LesAffx.37764.1.S1_at | CK715143 | AT2G03880.1 | CK71514 | V   | -0.29 | -1.15 | 35.1.5  | not assigned.no ontology.pentatricopeptide (PPR) repeat-containing protein | (at2g03880): pentatricopeptide (PPR) repeat-containing protein                                                                                                                                                                                                                                                                                                                                                           |
| Les.2073.1.S1_at      | BM410320 | AT3G07090.1 | TC23644 | I   | 1.12  | 0.45  | 35.2    | not assigned.unknown                                                       | (at3g07090): similar to unknown protein [Arabidopsis thaliana] (TAIR:AT5G25170.1); similar to expressed protein [Oryza sativa (japonica cultivar-group)] (GB:ABB47783.1); similar to unknown protein [Oryza sativa] (GB:AAG16855.1); similar to Os02g0814000 [Oryza sativa (japonica cultivar-group)] (GB:NP_001048488.1); contains InterPro domain Protein of unknown function DUF862, eukaryotic; (InterPro:IPR008580) |
| Les.2417.1.S1_at      | AI779519 | AT3G47070.1 | TC23220 | I   | 1.33  | 0.84  | 35.2    | not assigned.unknown                                                       | (at3g47070): similar to thylakoid soluble phosphoprotein [Spinacia oleracea] (GB:CAD45559.1)                                                                                                                                                                                                                                                                                                                             |
| Les.2682.1.S1_at      | CN385606 | AT5G17280.1 | TC22504 | I   | 1.36  | 0.81  | 35.2    | not assigned.unknown                                                       | (at5g17280): similar to oxidoreductase [Trypanosoma cruzi strain CL Brener] (GB:XP_808855.1); similar to Os09g0530900 [Oryza sativa (japonica cultivar-group)] (GB:NP_001063752.1)                                                                                                                                                                                                                                       |
| Les.4055.1.S1_at      | BM536050 | AT4G28290.1 | TC23122 | I   | 1.95  | 1.42  | 35.2    | not assigned.unknown                                                       | (at4g28290): unknown protein                                                                                                                                                                                                                                                                                                                                                                                             |
| Les.423.1.S1_at       | BM409421 | AT5G02020.1 | TC22953 | I   | 1.77  | 1.18  | 35.2    | not assigned.unknown                                                       | (at5g02020): similar to unknown protein [Arabidopsis thaliana] (TAIR:AT5G59080.1)                                                                                                                                                                                                                                                                                                                                        |
| LesAffx.22466.1.S1_at | AI774712 | AT3G19220.1 | TC23276 | I   | 1.22  | 0.81  | 35.2    | not assigned.unknown                                                       | (at3g19220): similar to conserved hypothetical protein [Medicago truncatula] (GB:ABE80527.1)                                                                                                                                                                                                                                                                                                                             |

|                       |          |             |         |    |      |      |      |                      |                                                                                                                                                                                                                                                                                                                                                                                                                                     |
|-----------------------|----------|-------------|---------|----|------|------|------|----------------------|-------------------------------------------------------------------------------------------------------------------------------------------------------------------------------------------------------------------------------------------------------------------------------------------------------------------------------------------------------------------------------------------------------------------------------------|
| LesAffx.26054.1.S1_at | BG135770 | AT4G04630.1 | TC21811 | I  | 1.38 | 0.78 | 35.2 | not assigned.unknown | (at4g04630): similar to unknown protein [Arabidopsis thaliana] (TAIR:AT4G21970.1); similar to Protein of unknown function, DUF584 [Medicago truncatula] (GB:ABE91657.1); contains InterPro domain Protein of unknown function DUF584; (InterPro:IPR007608)                                                                                                                                                                          |
| LesAffx.37595.1.A1_at | CN385844 | AT2G35290.1 | TC22360 | I  | 1.99 | 1.36 | 35.2 | not assigned.unknown | (at2g35290): similar to Os03g0170100 [Oryza sativa (japonica cultivar-group)] (GB:NP_001049105.1)                                                                                                                                                                                                                                                                                                                                   |
| LesAffx.56070.1.S1_at | BF113259 | AT1G13340.1 | TC23846 | I  | 1.02 | 0.68 | 35.2 | not assigned.unknown | (at1g13340): similar to unknown protein [Arabidopsis thaliana] (TAIR:AT4G35730.1); similar to unknown protein [Arabidopsis thaliana] (TAIR:AT1G34220.2); similar to expressed protein [Oryza sativa (japonica cultivar-group)] (GB:ABF95057.1); similar to Os03g0710000 [Oryza sativa (japonica cultivar-group)] (GB:NP_001051046.1); contains InterPro domain Protein of unknown function DUF292, eukaryotic; (InterPro:IPR005061) |
| LesAffx.59507.1.S1_at | BI203990 | AT4G27350.1 | TC21999 | I  | 1.29 | 1.06 | 35.2 | not assigned.unknown | (at4g27350): similar to unknown protein [Arabidopsis thaliana] (TAIR:AT5G54240.1); similar to membrane lipoprotein lipid attachment site-containing protein -like [Oryza sativa (japonica cultivar-group)] (GB:BAC84042.1); contains InterPro domain Protein of unknown function DUF1223; (InterPro:IPR010634)                                                                                                                      |
| Les.2643.1.S1_at      | BG128842 | AT3G03170.1 | TC23690 | II | 0.58 | 1.44 | 35.2 | not assigned.unknown | (at3g03170): similar to unknown protein [Arabidopsis thaliana] (TAIR:AT5G24890.1)                                                                                                                                                                                                                                                                                                                                                   |
| Les.5881.1.A1_at      | CK716328 | AT1G62045.1 | TC24065 | II | 0.48 | 1.12 | 35.2 | not assigned.unknown | (at1g62045): similar to ankyrin repeat family protein [Arabidopsis thaliana] (TAIR:AT1G11740.1); similar to conserved hypothetical protein [Medicago truncatula] (GB:ABE89099.1)                                                                                                                                                                                                                                                    |

|                       |          |             |         |    |       |       |      |                      |                                                                                                                                                                                                                                                                                                                                                                                          |
|-----------------------|----------|-------------|---------|----|-------|-------|------|----------------------|------------------------------------------------------------------------------------------------------------------------------------------------------------------------------------------------------------------------------------------------------------------------------------------------------------------------------------------------------------------------------------------|
| LesAffx.34771.1.S1_at | AW930136 | AT1G05360.1 | AW93013 | II | 0.46  | 1.51  | 35.2 | not assigned.unknown | (at1g05360): similar to unknown protein [Arabidopsis thaliana] (TAIR:AT4G14950.1); similar to conserved hypothetical protein [Medicago truncatula] (GB:ABE91712.1); contains domain VACUOLE MEMBRANE PROTEIN 1 (PTHR10281:SF1); contains domain MEMBRANE ASSOCIATED PROGESTERONE RECEPTOR-RELATED (PTHR10281)                                                                            |
| LesAffx.59625.1.S1_at | BI204607 | AT5G48540.1 | TC22866 | II | 0.49  | 1.83  | 35.2 | not assigned.unknown | (at5g48540): 33 kDa secretory protein-related                                                                                                                                                                                                                                                                                                                                            |
| LesAffx.60109.1.S1_at | BI204244 | AT3G08030.2 | TC22478 | II | -0.05 | 1.65  | 35.2 | not assigned.unknown | (at3g08030): similar to unknown protein [Arabidopsis thaliana] (TAIR:AT2G41800.1); similar to Os03g0807700 [Oryza sativa (japonica cultivar-group)] (GB:NP_001051644.1); similar to unknown [Ricinus communis] (GB:CAB02653.1); contains InterPro domain Galactose-binding like; (InterPro:IPR008979); contains InterPro domain Protein of unknown function DUF642; (InterPro:IPR006946) |
| LesAffx.62670.1.S1_at | BF113967 | AT2G17710.1 | TC22120 | II | 0.14  | 0.98  | 35.2 | not assigned.unknown | (at2g17710): similar to Os04g0560700 [Oryza sativa (japonica cultivar-group)] (GB:NP_001053549.1)                                                                                                                                                                                                                                                                                        |
| LesAffx.64333.1.S1_at | CN384866 | AT2G15890.1 | TC21750 | II | -0.46 | 1.19  | 35.2 | not assigned.unknown | (at2g15890): MEE14 (maternal effect embryo arrest 14)                                                                                                                                                                                                                                                                                                                                    |
| LesAffx.65882.1.S1_at | BG129533 | AT4G28310.1 | TC23537 | II | -0.08 | 1.4   | 35.2 | not assigned.unknown | (at4g28310): similar to unknown protein [Arabidopsis thaliana] (TAIR:AT1G52270.1); similar to unknown protein [Oryza sativa (japonica cultivar-group)] (GB:BAC22207.1)                                                                                                                                                                                                                   |
| Les.1501.1.A1_at      | BG626168 | AT1G11700.1 | TC24040 | VI | -1    | -1.05 | 35.2 | not assigned.unknown | (at1g11700): similar to unknown protein [Arabidopsis thaliana] (TAIR:AT1G61930.1); similar to Protein of unknown function DUF584 [Medicago truncatula] (GB:ABE80969.1); similar to Os07g0516300 [Oryza sativa (japonica cultivar-group)] (GB:NP_001059782.1); contains InterPro domain Protein of unknown function DUF584; (InterPro:IPR007608)                                          |

|                       |            |             |         |    |       |       |      |                      |                                                                                                                                                                                                                                                                                                                                                                                                                                             |
|-----------------------|------------|-------------|---------|----|-------|-------|------|----------------------|---------------------------------------------------------------------------------------------------------------------------------------------------------------------------------------------------------------------------------------------------------------------------------------------------------------------------------------------------------------------------------------------------------------------------------------------|
| Les.4300.2.S1_at      | AW217635   | AT5G11420.1 | TC21888 | VI | -0.97 | -1.04 | 35.2 | not assigned.unknown | (at5g11420): similar to unknown protein [Arabidopsis thaliana] (TAIR:AT5G25460.1); similar to unknown [Ricinus communis] (GB:CAB02653.1); contains InterPro domain Galactose-binding like; (InterPro:IPR008979); contains InterPro domain Protein of unknown function DUF642; (InterPro:IPR006946)                                                                                                                                          |
| Les.4938.1.S1_at      | BT012940.1 | AT2G32280.1 | TC22310 | VI | -2.5  | -1.81 | 35.2 | not assigned.unknown | (at2g32280): similar to unknown protein [Arabidopsis thaliana] (TAIR:AT4G21310.1); similar to Os07g0545100 [Oryza sativa (japonica cultivar-group)] (GB:NP_001059913.1); similar to Os05g0435100 [Oryza sativa (japonica cultivar-group)] (GB:NP_001055641.1); similar to hypothetical protein [Oryza sativa (japonica cultivar-group)] (GB:AAT47054.1); contains InterPro domain Protein of unknown function DUF1218; (InterPro:IPR009606) |
| Les.5696.1.S1_at      | BT014400.1 | AT1G29700.1 | TC23901 | VI | -0.69 | -1.03 | 35.2 | not assigned.unknown | (at1g29700): similar to similar to Zn-dependent hydrolases of the beta-lactamase fold [Crocospaera watsonii WH 8501] (GB:ZP_00516888.1); similar to Os12g0641300 [Oryza sativa (japonica cultivar-group)] (GB:NP_001067402.1); contains domain no description (G3D.3.60.15.10); contains domain Metallo-hydrolase/oxidoreductase (SSF56281)                                                                                                 |
| LesAffx.52453.1.S1_at | BG135842   | AT5G59830.2 | BI92407 | VI | -0.92 | -1.09 | 35.2 | not assigned.unknown | (at5g59830): similar to unknown protein [Arabidopsis thaliana] (TAIR:AT5G13660.1); similar to predicted protein [Populus alba x Populus tremula] (GB:AAR14274.1)                                                                                                                                                                                                                                                                            |

|                       |          |             |         |    |       |       |      |                      |                                                                                                                                                                                                                                                                                                                                                                                                                                               |
|-----------------------|----------|-------------|---------|----|-------|-------|------|----------------------|-----------------------------------------------------------------------------------------------------------------------------------------------------------------------------------------------------------------------------------------------------------------------------------------------------------------------------------------------------------------------------------------------------------------------------------------------|
| LesAffx.52470.1.S1_at | BM412030 | AT3G22970.1 | TC23981 | VI | -0.91 | -1.05 | 35.2 | not assigned.unknown | (at3g22970): similar to unknown protein [Arabidopsis thaliana] (TAIR:AT4G14620.1); similar to unknown protein [Oryza sativa (japonica cultivar-group)] (GB:AAP44687.1); similar to expressed protein [Oryza sativa (japonica cultivar-group)] (GB:AAT76408.1); similar to Os03g0796600 [Oryza sativa (japonica cultivar-group)] (GB:NP_001051556.1); contains InterPro domain Protein of unknown function DUF506, plant; (InterPro:IPR006502) |
| LesAffx.61000.1.S1_at | BM410987 | AT2G38820.2 | TC23050 | VI | -1.71 | -1.88 | 35.2 | not assigned.unknown | (at2g38820): similar to unknown protein [Arabidopsis thaliana] (TAIR:AT3G22970.1); similar to unknown protein [Oryza sativa (japonica cultivar-group)] (GB:AAP44687.1); similar to expressed protein [Oryza sativa (japonica cultivar-group)] (GB:AAT76408.1); similar to Os03g0796600 [Oryza sativa (japonica cultivar-group)] (GB:NP_001051556.1); contains InterPro domain Protein of unknown function DUF506, plant; (InterPro:IPR006502) |
| LesAffx.64757.1.A1_at | AI490042 | AT5G67390.2 | TC22570 | VI | -1.81 | -1.51 | 35.2 | not assigned.unknown | (at5g67390): similar to unknown protein [Arabidopsis thaliana] (TAIR:AT5G57340.1); similar to hypothetical protein MtrDRAFT_AC137703g30v2 [Medicago truncatula] (GB:ABE82530.1)                                                                                                                                                                                                                                                               |
| LesAffx.65306.1.S1_at | AW621362 | AT5G61820.1 | TC23246 | VI | -0.91 | -1.17 | 35.2 | not assigned.unknown | (at5g61820): similar to hypothetical protein [Trifolium pratense] (GB:BAE71234.1); contains InterPro domain Stress up-regulated Nod 19; (InterPro:IPR011692)                                                                                                                                                                                                                                                                                  |
| LesAffx.69164.1.S1_at | AW649318 | AT1G31130.1 | TC22018 | VI | -0.9  | -1.14 | 35.2 | not assigned.unknown | (at1g31130): similar to unknown protein [Arabidopsis thaliana] (TAIR:AT5G44860.1); similar to conserved hypothetical protein [Medicago truncatula] (GB:ABE90086.1); contains domain gb def: Hypothetical protein AT4g16850 (PTHR22597:SF10); contains domain FAMILY NOT NAMED (PTHR22597)                                                                                                                                                     |

|                       |            |             |         |   |       |       |      |                      |                                                                                                                                                                                                                                                                                                                                                                                                                                  |
|-----------------------|------------|-------------|---------|---|-------|-------|------|----------------------|----------------------------------------------------------------------------------------------------------------------------------------------------------------------------------------------------------------------------------------------------------------------------------------------------------------------------------------------------------------------------------------------------------------------------------|
| Les.3742.1.S1_at      | AF146690.1 | AT1G74950.1 | TC22347 | V | -0.84 | -1.39 | 35.2 | not assigned.unknown | (at1g74950): similar to unknown protein [Arabidopsis thaliana] (TAIR:AT1G19180.1); similar to PnFL-2 [Ipomoea nil] (GB:AAG49896.1); contains InterPro domain ZIM; (InterPro:IPR010399)                                                                                                                                                                                                                                           |
| LesAffx.3537.1.A1_at  | AJ784726   | AT3G15810.1 | TC24068 | V | -0.49 | -1.13 | 35.2 | not assigned.unknown | (at3g15810): similar to unknown protein [Arabidopsis thaliana] (TAIR:AT1G80120.1); similar to Os01g0771000 [Oryza sativa (japonica cultivar-group)] (GB:NP_001044381.1); similar to hypothetical protein-like protein [Sorghum bicolor] (GB:AAO16702.1); similar to Os05g0510100 [Oryza sativa (japonica cultivar-group)] (GB:NP_001056006.1); contains InterPro domain Protein of unknown function DUF567; (InterPro:IPR007612) |
| LesAffx.38499.1.A1_at | BI209699   | AT4G19160.1 | TC22324 | V | -0.47 | -1.41 | 35.2 | not assigned.unknown | (at4g19160): binding                                                                                                                                                                                                                                                                                                                                                                                                             |
| LesAffx.48370.1.S1_at | AW929756   | AT4G31530.1 | TC22420 | V | -0.4  | -1.18 | 35.2 | not assigned.unknown | (at4g31530): catalytic/ coenzyme binding                                                                                                                                                                                                                                                                                                                                                                                         |
| LesAffx.59375.1.A1_at | AI485882   | AT5G02480.1 | TC24048 | V | -0.35 | -1.14 | 35.2 | not assigned.unknown | (at5g02480): similar to SLT1 (SODIUM- AND LITHIUM-TOLERANT 1) [Arabidopsis thaliana] (TAIR:AT2G37570.1); similar to SLT1 protein [Nicotiana tabacum] (GB:AAG39002.1); contains InterPro domain HSP20-like chaperone; (InterPro:IPR008978); contains InterPro domain Heat shock protein Hsp20; (InterPro:IPR002068)                                                                                                               |
| LesAffx.6294.1.S1_at  | BI210923   | AT3G53400.1 | TC22443 | V | -0.18 | -1.06 | 35.2 | not assigned.unknown | (at3g53400): similar to unknown protein [Arabidopsis thaliana] (TAIR:AT5G03190.1); similar to conserved hypothetical protein [Medicago truncatula] (GB:ABD32814.1); contains domain ARM repeat (SSF48371); contains domain no description (G3D.3.40.50.1860)                                                                                                                                                                     |
| LesAffx.65428.1.S1_at | BM411427   | AT1G14690.2 | TC22724 | V | -0.64 | -1.15 | 35.2 | not assigned.unknown | no match                                                                                                                                                                                                                                                                                                                                                                                                                         |

|                       |            |             |         |     |       |       |      |                      |                                                                                                                                                                                                                                                                                                                                                                                                                                                   |
|-----------------------|------------|-------------|---------|-----|-------|-------|------|----------------------|---------------------------------------------------------------------------------------------------------------------------------------------------------------------------------------------------------------------------------------------------------------------------------------------------------------------------------------------------------------------------------------------------------------------------------------------------|
| LesAffx.66847.1.S1_at | AI778064   | AT1G04030.1 | AI77806 | V   | -0.27 | -1.09 | 35.2 | not assigned.unknown | (at1g04030): similar to unknown protein [Arabidopsis thaliana] (TAIR:AT5G44040.1); similar to At1g04030 [Coffea canephora] (GB:ABD93477.2); similar to Os04g0511700 [Oryza sativa (japonica cultivar-group)] (GB:NP_001053294.1); similar to OSIGBa0157K09-H0214G12.18 [Oryza sativa (indica cultivar-group)] (GB:CAH68007.1)                                                                                                                     |
| LesAffx.67482.1.S1_at | BG123945   | AT5G20270.1 | TC23975 | V   | -0.15 | -1.24 | 35.2 | not assigned.unknown | (at5g20270): HHP1 (HEPTAHELICAL TRANSMEMBRANE PROTEIN1)                                                                                                                                                                                                                                                                                                                                                                                           |
| LesAffx.71003.1.S1_at | AI779846   | AT1G64680.1 | TC22050 | V   | -0.15 | -1.14 | 35.2 | not assigned.unknown | (at1g64680): similar to unknown protein [Arabidopsis thaliana] (TAIR:AT1G03055.1); similar to hypothetical protein LOC_Os11g37650 [Oryza sativa (japonica cultivar-group)] (GB:ABA94460.1); similar to Os08g0114100 [Oryza sativa (japonica cultivar-group)] (GB:NP_001060847.1)                                                                                                                                                                  |
| Les.1159.1.S1_at      | AW096608   | AT3G52040.1 | TC23740 | III | 1     | 0.96  | 35.2 | not assigned.unknown | (at3g52040): similar to unknown [Hyacinthus orientalis] (GB:AAS20983.1)                                                                                                                                                                                                                                                                                                                                                                           |
| Les.2631.2.S1_at      | BI208990   | AT3G01130.1 | TC23151 | III | 0.66  | 1.02  | 35.2 | not assigned.unknown | no match                                                                                                                                                                                                                                                                                                                                                                                                                                          |
| Les.5130.1.S1_at      | BT013342.1 | AT1G22030.1 | TC23433 | III | 1.11  | 1.59  | 35.2 | not assigned.unknown | (at1g22030): similar to unknown protein [Arabidopsis thaliana] (TAIR:AT1G77855.1); similar to Os08g0104800 [Oryza sativa (japonica cultivar-group)] (GB:NP_001060781.1); similar to unknown protein [Oryza sativa (japonica cultivar-group)] (GB:BAD08928.1); similar to Os01g0875000 [Oryza sativa (japonica cultivar-group)] (GB:NP_001044961.1); contains domain RHOMBOID-RELATED (PTHR22936); contains domain UNCHARACTERIZED (PTHR22936:SF1) |
| Les.5804.1.S1_at      | BT014601.1 | AT5G24165.1 | TC22840 | III | 0.68  | 1     | 35.2 | not assigned.unknown | (at5g24165): similar to unknown protein [Arabidopsis thaliana] (TAIR:AT4G23885.1); similar to Os06g0530200 [Oryza sativa (japonica cultivar-group)] (GB:NP_001057777.1)                                                                                                                                                                                                                                                                           |



|                       |            |             |         |     |      |      |      |                      |                                                                                                                                                                                                                                                              |
|-----------------------|------------|-------------|---------|-----|------|------|------|----------------------|--------------------------------------------------------------------------------------------------------------------------------------------------------------------------------------------------------------------------------------------------------------|
| Les.638.1.S1_at       | BT012771.1 | AT1G07040.1 | TC21816 | III | 1.02 | 1.04 | 35.2 | not assigned.unknown | (at1g07040): similar to unknown protein [Arabidopsis thaliana] (TAIR:AT1G27030.1); similar to unknown protein [Oryza sativa (japonica cultivar-group)] (GB:AAN05517.1); similar to Os10g0463800 [Oryza sativa (japonica cultivar-group)] (GB:NP_001064789.1) |
| LesAffx.17017.1.S1_at | CN384671   | AT5G17350.1 | TC24170 | III | 1.57 | 1.48 | 35.2 | not assigned.unknown | (at5g17350): similar to unknown protein [Arabidopsis thaliana] (TAIR:AT3G03280.1); similar to conserved hypothetical protein [Medicago truncatula] (GB:ABE92227.1); contains InterPro domain TGS-like; (InterPro:IPR012676)                                  |
| LesAffx.3460.1.S1_at  | CN384958   | AT4G09890.1 | EG55377 | III | 1.1  | 1.53 | 35.2 | not assigned.unknown | (at4g09890): similar to unknown protein [Arabidopsis thaliana] (TAIR:AT5G11970.1); similar to conserved hypothetical protein [Medicago truncatula] (GB:ABE81195.1)                                                                                           |
| LesAffx.50466.1.S1_at | AI780511   | AT2G20820.1 | TC23061 | III | 1.1  | 1.2  | 35.2 | not assigned.unknown | (at2g20820): similar to hypothetical protein [Capsicum chinense] (GB:CAJ13713.1)                                                                                                                                                                             |
| LesAffx.57303.1.S1_at | AW625293   | AT5G40690.1 | TC22186 | III | 1.76 | 2.08 | 35.2 | not assigned.unknown | (at5g40690): similar to unknown protein [Arabidopsis thaliana] (TAIR:AT2G41730.1)                                                                                                                                                                            |
| LesAffx.60006.1.S1_at | BG643009   | AT5G26230.1 | TC22674 | III | 1.07 | 1.59 | 35.2 | not assigned.unknown | (at5g26230): similar to unknown protein [Arabidopsis thaliana] (TAIR:AT5G42750.1); similar to Os05g0390600 [Oryza sativa (japonica cultivar-group)] (GB:NP_001055441.1); similar to PREDICTED: hypothetical protein [Rattus norve (GB:XP_001078830.1)        |
| LesAffx.60171.1.S1_at | BG134335   | AT5G14105.1 | TC22657 | III | 0.65 | 1.01 | 35.2 | not assigned.unknown | (at5g14105): similar to Os05g0517800 [Oryza sativa (japonica cultivar-group)] (GB:NP_001056054.1); similar to Os03g0733000 [Oryza sativa (japonica cultivar-group)] (GB:NP_001051172.1)                                                                      |

|                       |          |             |         |     |      |      |      |                      |                                                                                                                                                                                                                                                                                                                                                                                                                             |
|-----------------------|----------|-------------|---------|-----|------|------|------|----------------------|-----------------------------------------------------------------------------------------------------------------------------------------------------------------------------------------------------------------------------------------------------------------------------------------------------------------------------------------------------------------------------------------------------------------------------|
| LesAffx.60242.1.S1_at | BI207558 | AT2G16460.2 | TC23660 | III | 1.09 | 0.98 | 35.2 | not assigned.unknown | (at2g16460): similar to unknown protein [Arabidopsis thaliana] (TAIR:AT3G51090.1); similar to Os06g0713100 [Oryza sativa (japonica cultivar-group)] (GB:NP_001058564.1); similar to conserved hypothetical protein [Medicago truncatula] (GB:ABE89621.1); contains InterPro domain Protein of unknown function DUF1640; (InterPro:IPR012439)                                                                                |
| LesAffx.61510.2.S1_at | BE433504 | AT1G27200.1 | TC23546 | III | 0.76 | 1.19 | 35.2 | not assigned.unknown | (at1g27200): similar to zinc finger (C3HC4-type RING finger) family protein [Arabidopsis thaliana] (TAIR:AT3G27330.1); similar to Os08g0121900 [Oryza sativa (japonica cultivar-group)] (GB:NP_001060883.1); similar to zinc finger (C3HC4-type RING finger) protein family-like [Oryza sativa (japonica cultivar-group)] (GB:BAD10590.1); contains InterPro domain Protein of unknown function DUF23; (InterPro:IPR008166) |
| LesAffx.62690.1.S1_at | BI206793 | AT5G11950.2 | TC22770 | III | 0.97 | 1.72 | 35.2 | not assigned.unknown | (at5g11950): Identical to Lysine decarboxylase-like protein At5g11950 [Arabidopsis Thaliana] (GB:Q84MC2;GB:Q570P8;GB:Q9LYH8); similar to unknown protein [Arabidopsis thaliana] (TAIR:AT2G37210.1); similar to Conserved hypothetical protein 730 [Medicago truncatula] (GB:ABE86251.1); contains InterPro domain Conserved hypothetical protein 730; (InterPro:IPR005269)                                                  |
| LesAffx.62803.1.S1_at | AW223168 | AT1G29040.1 | TC22502 | III | 0.94 | 0.88 | 35.2 | not assigned.unknown | (at1g29040): similar to unknown protein [Oryza sativa (japonica cultivar-group)] (GB:BAD61226.1); similar to Os01g0613300 [Oryza sativa (japonica cultivar-group)] (GB:NP_001043561.1); contains InterPro domain Conserved hypothetical protein 2058; (InterPro:IPR011719)                                                                                                                                                  |
| LesAffx.63980.1.S1_at | AI780160 | AT3G02800.1 | TC22905 | III | 1.06 | 1.03 | 35.2 | not assigned.unknown | (at3g02800): phosphoprotein phosphatase                                                                                                                                                                                                                                                                                                                                                                                     |

|                       |          |             |         |     |      |      |      |                      |                                                                                                                                                                                                                                                                                                                                                                                                                   |
|-----------------------|----------|-------------|---------|-----|------|------|------|----------------------|-------------------------------------------------------------------------------------------------------------------------------------------------------------------------------------------------------------------------------------------------------------------------------------------------------------------------------------------------------------------------------------------------------------------|
| LesAffx.68459.2.S1_at | BM411992 | AT3G28630.1 | TC22747 | III | 1.78 | 1.84 | 35.2 | not assigned.unknown | (at3g28630): similar to unknown protein [Arabidopsis thaliana] (TAIR:AT1G59710.1); similar to Cytosolic fatty-acid binding; Actin-crosslinking proteins [Medicago truncatula] (GB:ABE82702.1); contains InterPro domain Protein of unknown function DUF569; (InterPro:IPR007679); contains InterPro domain Actin-crosslinking proteins; (InterPro:IPR008999)                                                      |
| LesAffx.69747.1.S1_at | BM536068 | AT5G39890.1 | TC21831 | III | 1.08 | 1.01 | 35.2 | not assigned.unknown | (at5g39890): similar to unknown protein [Arabidopsis thaliana] (TAIR:AT5G15120.1); similar to unknown protein [Oryza sativa (japonica cultivar-group)] (GB:BAB03364.1); similar to Os01g0185500 [Oryza sativa (japonica cultivar-group)] (GB:NP_001042241.1); contains InterPro domain Protein of unknown function DUF1637; (InterPro:IPR012864); contains InterPro domain Cupin, RmlC-type; (InterPro:IPR011051) |
| LesAffx.69872.1.S1_at | CN385882 | AT1G05575.1 | TC23745 | III | 1.94 | 2.64 | 35.2 | not assigned.unknown | (at1g05575): similar to unknown protein [Arabidopsis thaliana] (TAIR:AT2G31945.1); similar to hypothetical protein [Oryza sativa (japonica cultivar-group)] (GB:BAD38225.1); similar to Os06g0207200 [Oryza sativa (japonica cultivar-group)] (GB:NP_001057099.1); similar to Os02g0774200 [Oryza sativa (japonica cultivar-group)] (GB:NP_001048273.1)                                                           |

|                       |            |             |         |     |       |       |      |                      |                                                                                                                                                                                                                                                                                                                                                                                                                                                                                                 |
|-----------------------|------------|-------------|---------|-----|-------|-------|------|----------------------|-------------------------------------------------------------------------------------------------------------------------------------------------------------------------------------------------------------------------------------------------------------------------------------------------------------------------------------------------------------------------------------------------------------------------------------------------------------------------------------------------|
| LesAffx.71530.1.S1_at | BI930780   | AT1G60060.1 | TC23505 | III | 1.29  | 1.27  | 35.2 | not assigned.unknown | (at1g60060): similar to unknown protein [Arabidopsis thaliana] (TAIR:AT5G53900.2); similar to Os02g0742700 [Oryza sativa (japonica cultivar-group)] (GB:NP_001048090.1); similar to unknown protein [Oryza sativa (japonica cultivar-group)] (GB:BAD37771.1); similar to Os06g0233800 [Oryza sativa (japonica cultivar-group)] (GB:NP_001057234.1); contains domain gb def: At3g15240 (PTHR13902:SF3); contains domain SERINE/THREONINE-PROTEIN KINASE WNK (WITH NO LYSINE)-RELATED (PTHR13902) |
| LesAffx.71544.1.S1_at | BI422043   | AT5G11000.1 | TC21855 | III | 0.88  | 1.04  | 35.2 | not assigned.unknown | (at5g11000): similar to unknown protein [Arabidopsis thaliana] (TAIR:AT2G25200.1); similar to Os08g0439600 [Oryza sativa (japonica cultivar-group)] (GB:NP_001061898.1); similar to unknown protein [Oryza sativa (japonica cultivar-group)] (GB:BAD28921.1); contains InterPro domain Protein of unknown function DUF868, plant; (InterPro:IPR008586)                                                                                                                                          |
| Les.2545.1.S1_at      | BT014360.1 | AT1G29980.1 | TC22148 | IV  | -1.37 | -0.36 | 35.2 | not assigned.unknown | (at1g29980): similar to unknown protein [Arabidopsis thaliana] (TAIR:AT2G34510.1); similar to unknown [Ricinus communis] (GB:CAB02653.1); similar to Os01g0756600 [Oryza sativa (japonica cultivar-group)] (GB:NP_001044289.1); similar to Os01g0531400 [Oryza sativa (japonica cultivar-group)] (GB:NP_001043243.1); contains InterPro domain Galactose-binding like; (InterPro:IPR008979); contains InterPro domain Protein of unknown function DUF642; (InterPro:IPR006946)                  |

|                  |            |             |         |    |       |       |      |                      |                                                                                                                                                                                                                                                                                                                                                                                                                                                                                  |
|------------------|------------|-------------|---------|----|-------|-------|------|----------------------|----------------------------------------------------------------------------------------------------------------------------------------------------------------------------------------------------------------------------------------------------------------------------------------------------------------------------------------------------------------------------------------------------------------------------------------------------------------------------------|
| Les.5223.1.S1_at | BT013527.1 | AT2G12400.1 | TC23738 | IV | -1.29 | -0.32 | 35.2 | not assigned.unknown | (at2g12400): similar to unknown protein [Arabidopsis thaliana] (TAIR:AT2G25270.1); similar to H0306F03.12 [Oryza sativa (indica cultivar-group)] (GB:CAH68245.1); similar to Os04g0644000 [Oryza sativa (japonica cultivar-group)] (GB:NP_001054054.1); similar to Os02g0799300 [Oryza sativa (japonica cultivar-group)] (GB:NP_001048408.1)                                                                                                                                     |
| Les.5419.1.S1_at | BT013877.1 | AT5G53900.1 | TC23973 | IV | -1.38 | -0.48 | 35.2 | not assigned.unknown | (at5g53900): similar to unknown protein [Arabidopsis thaliana] (TAIR:AT3G15240.2); similar to Os11g0446000 [Oryza sativa (japonica cultivar-group)] (GB:NP_001067826.1); similar to expressed protein [Oryza sativa (japonica cultivar-group)] (GB:ABA93307.2); contains domain gb def: At3g15240 (PTHR13902:SF3); contains domain SERINE/THREONINE-PROTEIN KINASE WNK (WITH NO LYSINE)-RELATED (PTHR13902)                                                                      |
| Les.744.1.S1_at  | BT013096.1 | AT1G72480.1 | TC23212 | IV | -1.09 | -0.54 | 35.2 | not assigned.unknown | (at1g72480): similar to unknown protein [Arabidopsis thaliana] (TAIR:AT2G01070.1); similar to Os11g0546100 [Oryza sativa (japonica cultivar-group)] (GB:NP_001068063.1); similar to Os09g0439700 [Oryza sativa (japonica cultivar-group)] (GB:NP_001063277.1); similar to Lung seven transmembrane receptor family protein, expressed [Oryza sativa (japonica cultivar-group)] (GB:ABF95807.1); contains InterPro domain Lung seven transmembrane receptor; (InterPro:IPR009637) |

|                       |            |             |         |     |       |       |         |                                                                                       |                                                                                                                                                                                                                                                                                                                                   |
|-----------------------|------------|-------------|---------|-----|-------|-------|---------|---------------------------------------------------------------------------------------|-----------------------------------------------------------------------------------------------------------------------------------------------------------------------------------------------------------------------------------------------------------------------------------------------------------------------------------|
| LesAffx.65028.1.S1_at | BG128587   | AT1G13380.1 | TC22082 | IV  | -1.55 | -0.98 | 35.2    | not assigned.unknown                                                                  | (at1g13380): similar to unknown protein [Arabidopsis thaliana] (TAIR:AT4G27435.1); similar to Os09g0281300 [Oryza sativa (japonica cultivar-group)] (GB:NP_001062767.1); similar to fiber protein Fb34 [Gossypium barbadense] (GB:AAR07596.1); contains InterPro domain Protein of unknown function DUF1218; (InterPro:IPR009606) |
| Les.3935.1.S1_at      | BT013403.1 | AT5G28050.2 | TC21790 | III | 1.37  | 1.28  | 23.2    | nucleotide metabolism.degradation                                                     | (at5g28050): hydrolase/ zinc ion binding                                                                                                                                                                                                                                                                                          |
| LesAffx.62121.1.S1_at | AW220705   | AT2G36310.1 | TC24448 | III | 0.64  | 1.14  | 23.2    | nucleotide metabolism.degradation                                                     | (at2g36310): inosine-uridine preferring nucleoside hydrolase family protein                                                                                                                                                                                                                                                       |
| LesAffx.69601.1.S1_at | AW030431   | AT5G54390.1 | TC21962 | IV  | -1.18 | -0.62 | 23.2    | nucleotide metabolism.degradation                                                     | (at5g54390): AHL (HAL2-LIKE); 3'(2'),5'-bisphosphate nucleotidase/ inositol or phosphatidylinositol phosphatase                                                                                                                                                                                                                   |
| Les.3597.1.S1_at      | S40549.1   | AT3G46940.1 | TC22411 | II  | -0.96 | 1.36  | 23.5.5  | nucleotide metabolism.deoxynucleotide metabolism.dUTP diphosphatase                   | (at3g46940): deoxyuridine 5'-triphosphate nucleotidohydrolase family                                                                                                                                                                                                                                                              |
| LesAffx.2226.1.S1_at  | BI422950   | AT3G27060.1 | TC23401 | III | 1.04  | 1.21  | 23.5.4  | nucleotide metabolism.deoxynucleotide metabolism.ribonucleoside-diphosphate reductase | (at3g27060): TSO2 (TSO2); ribonucleoside-diphosphate reductase                                                                                                                                                                                                                                                                    |
| LesAffx.7602.1.S1_at  | AW443858   | AT5G63400.1 | TC23283 | III | 1.37  | 1.18  | 23.4.1  | nucleotide metabolism.phosphotransfer and pyrophosphatases.adenylate kinase           | (at5g63400): ADK1 (ADENYLATE KINASE 1); adenylate kinase                                                                                                                                                                                                                                                                          |
| LesAffx.63172.1.S1_at | AW031388   | AT3G53620.1 | TC22898 | II  | 0.85  | 1.78  | 23.4.99 | nucleotide metabolism.phosphotransfer and pyrophosphatases.misc                       | (at3g53620): inorganic pyrophosphatase, putative (soluble) / pyrophosphate phospho-hydrolase, putative / PPase, putative                                                                                                                                                                                                          |
| Les.4471.1.S1_at      | AF514776.1 | AT1G72040.1 | TC22151 | VI  | -0.81 | -1.21 | 23.3    | nucleotide metabolism.salvage                                                         | (at1g72040): deoxynucleoside kinase family                                                                                                                                                                                                                                                                                        |
| LesAffx.26180.1.S1_at | BG132890   | AT1G68760.1 | BG13289 | II  | 1     | 2.13  | 23.3.3  | nucleotide metabolism.salvage.NUDIX hydrolases                                        | (at1g68760): ATNUDT1 (Arabidopsis thaliana Nudix hydrolase homolog 1); dihydroneopterin triphosphate pyrophosphohydrolase/ hydrolase                                                                                                                                                                                              |
| Les.4888.1.A1_at      | BT012839.1 | AT5G47650.1 | AW39852 | III | 1.85  | 1.8   | 23.3.3  | nucleotide metabolism.salvage.NUDIX hydrolases                                        | (at5g47650): ATNUDT2 (Arabidopsis thaliana Nudix hydrolase homolog 2); ADP-ribose diphosphatase/ NAD binding / hydrolase                                                                                                                                                                                                          |

|                       |            |             |         |    |       |       |        |                                                  |                                                                                                                                                                                                                                                                                                                                          |
|-----------------------|------------|-------------|---------|----|-------|-------|--------|--------------------------------------------------|------------------------------------------------------------------------------------------------------------------------------------------------------------------------------------------------------------------------------------------------------------------------------------------------------------------------------------------|
| Les.4857.2.S1_at      | BT013315.1 | AT5G47240.1 | TC24509 | IV | -1.13 | -0.23 | 23.3.3 | nucleotide metabolism.salvage.NUDIX hydrolases   | (at5g47240): ATNUDT8 (Arabidopsis thaliana Nudix hydrolase homolog 8); hydrolase                                                                                                                                                                                                                                                         |
| Les.2959.1.S1_at      | BG734632   | AT2G45290.1 | TC22039 | VI | -0.76 | -1.14 | 7.2.1  | OPP.non-reductive PP.transketolase               | (at2g45290): transketolase, putative                                                                                                                                                                                                                                                                                                     |
| Les.702.1.S1_at       | BG627003   | AT3G25570.1 | TC21772 | I  | 1.72  | 0.2   | 22.1.2 | polyamine metabolism.synthesis.SAM decarboxylase | (at3g25570): adenosylmethionine decarboxylase family protein                                                                                                                                                                                                                                                                             |
| Les.172.2.S1_a_at     | BT014416.1 | AT5G53120.3 | TC22899 | V  | -0.66 | -1.68 | 22.1.7 | polyamine metabolism.synthesis.spermine synthase | (at5g53120): SPDS3 (SPERMIDINE SYNTHASE 3)                                                                                                                                                                                                                                                                                               |
| Les.4473.1.S1_at      | AJ606077.1 | AT5G19530.2 | TC22116 | IV | -1.59 | -1.04 | 22.1.7 | polyamine metabolism.synthesis.spermine synthase | (at5g19530): ACL5 (ACAULIS 5)                                                                                                                                                                                                                                                                                                            |
| Les.4563.1.S1_at      | BT014344.1 | AT1G35340.3 | TC23345 | VI | -1.2  | -0.88 | 29.5   | protein.degradation                              | (at1g35340): ATP-dependent protease La (LON) domain-containing protein                                                                                                                                                                                                                                                                   |
| Les.3266.2.S1_at      | BI931445   | AT4G17830.1 | TC23669 | V  | 0.02  | -2.1  | 29.5   | protein.degradation                              | (at4g17830): peptidase M20/M25/M40 family protein                                                                                                                                                                                                                                                                                        |
| Les.84.1.S1_at        | U50151.1   | AT2G24200.2 | TC21723 | V  | -0.17 | -2.77 | 29.5   | protein.degradation                              | (at2g24200): cytosol aminopeptidase                                                                                                                                                                                                                                                                                                      |
| Les.1042.1.A1_at      | BG629025   | AT1G10750.1 | TC22972 | IV | -1.52 | -0.17 | 29.5   | protein.degradation                              | (at1g10750): similar to unknown protein [Arabidopsis thaliana] (TAIR:AT1G70550.1); similar to unknown protein [Arabidopsis thaliana] (TAIR:AT1G23340.2); similar to putative carboxyl-terminal proteinase [Gossypium hirsutum] (GB:AAK84952.2); contains InterPro domain Protein of unknown function DUF239, plant; (InterPro:IPR004314) |
| Les.2068.1.A1_at      | BG631401   | AT3G45010.1 | TC24040 | IV | -1.19 | -0.78 | 29.5   | protein.degradation                              | (at3g45010): SCPL48 (serine carboxypeptidase-like 48); serine carboxypeptidase                                                                                                                                                                                                                                                           |
| LesAffx.16102.1.S1_at | BI208311   | AT3G28510.1 | TC23896 | I  | 1.67  | 1.31  | 29.5.9 | protein.degradation.AAA type                     | (at3g28510): AAA-type ATPase family protein                                                                                                                                                                                                                                                                                              |
| Les.4026.1.S1_at      | AY155579.1 | AT1G03220.1 | TC21731 | II | 0.74  | 1.77  | 29.5.4 | protein.degradation.aspartate protease           | MULTIPLE HITS: (at1g03220,at1g03230). at1g03220: extracellular dermal glycoprotein, putative / EDGP, putative at1g03230: extracellular dermal glycoprotein, putative / EDGP, putative                                                                                                                                                    |

|                       |            |             |         |     |       |       |              |                                              |                                                                                                       |
|-----------------------|------------|-------------|---------|-----|-------|-------|--------------|----------------------------------------------|-------------------------------------------------------------------------------------------------------|
| Les.184.1.S1_at       | L46681.1   | AT1G11910.1 | TC21791 | VI  | -0.84 | -1.24 | 29.5.4       | protein.degradation.aspartate protease       | (at1g11910): aspartyl protease family protein                                                         |
| LesAffx.64206.1.S1_at | AW034232   | AT1G01300.1 | TC21738 | VI  | -1.34 | -1.01 | 29.5.4       | protein.degradation.aspartate protease       | (at1g01300): aspartyl protease family protein                                                         |
| LesAffx.31022.1.S1_at | CK715372   | AT4G16563.1 | TC23408 | V   | -0.31 | -1.17 | 29.5.4       | protein.degradation.aspartate protease       | (at4g16563): aspartyl protease family protein                                                         |
| Les.2513.1.S1_at      | BI205120   | AT4G16520.2 | TC22383 | II  | 0.36  | 1.07  | 29.5.2       | protein.degradation.autophagy                | (at4g16520): ATG8F (AUTOPHAGY 8F); microtubule binding                                                |
| Les.2256.1.S1_at      | BT014302.1 | AT5G50260.1 | GO37635 | III | 1.88  | 2.66  | 29.5.3       | protein.degradation.cysteine protease        | (at5g50260): cysteine proteinase, putative                                                            |
| Les.5711.1.S1_at      | BT014429.1 | AT4G39090.1 | TC21831 | III | 1.15  | 2.11  | 29.5.3       | protein.degradation.cysteine protease        | (at4g39090): RD19 (RESPONSIVE TO DEHYDRATION 19); cysteine-type peptidase                             |
| LesAffx.1244.1.S1_at  | BG126114   | AT3G22260.2 | TC22939 | III | 1.15  | 1.37  | 29.5.3       | protein.degradation.cysteine protease        | (at3g22260): OTU-like cysteine protease family protein                                                |
| Les.3369.2.S1_at      | AW934098   | AT2G30950.1 | TC23328 | V   | -0.58 | -1.16 | 29.5.7       | protein.degradation.metalloprotease          | (at2g30950): VAR2 (VARIEGATED 2); ATP-dependent peptidase/ ATPase/ metallopeptidase/ zinc ion binding |
| LesAffx.63935.1.S1_at | AW442721   | AT1G24140.1 | TC23203 | III | 1.64  | 2.01  | 29.5.7       | protein.degradation.metalloprotease          | (at1g24140): matrixin family protein                                                                  |
| Les.3515.1.S1_at      | AF242849.1 | AT3G25420.1 | TC21891 | V   | -0.22 | -1.9  | 29.5.5       | protein.degradation.serine protease          | (at3g25420): SCPL21 (serine carboxypeptidase-like 21); serine carboxypeptidase                        |
| Les.21.1.S1_at        | AJ006377.1 | AT5G51750.1 | TC23436 | VI  | -1.16 | -1.44 | 29.5.1       | protein.degradation.subtilases               | (at5g51750): subtilase family protein                                                                 |
| Les.513.1.S1_at       | BG626001   | AT5G51750.1 | TC22866 | VI  | -1.66 | -2.13 | 29.5.1       | protein.degradation.subtilases               | (at5g51750): subtilase family protein                                                                 |
| Les.3648.1.S1_at      | X95270.1   | AT5G67360.1 | TC21719 | V   | -0.6  | -1.43 | 29.5.1       | protein.degradation.subtilases               | (at5g67360): ARA12; subtilase                                                                         |
| Les.15.1.S1_at        | X98929.1   | AT5G67360.1 | TC21718 | IV  | -2.1  | -0.53 | 29.5.1       | protein.degradation.subtilases               | (at5g67360): ARA12; subtilase                                                                         |
| Les.3312.2.S1_at      | BI932707   | AT2G05920.1 | TC21843 | IV  | -1.45 | -0.79 | 29.5.1       | protein.degradation.subtilases               | (at2g05920): subtilase family protein                                                                 |
| Les.3155.1.S1_at      | BT013204.1 | AT1G64230.2 | TC21967 | III | 1.14  | 1.26  | 29.5.11.3    | protein.degradation.ubiquitin.E2             | (at1g64230): UBC28; ubiquitin-protein ligase                                                          |
| LesAffx.20391.1.S1_at | BF176422   | AT1G23390.1 | TC22123 | I   | 1.01  | 0.49  | 29.5.11.4.3  | protein.degradation.ubiquitin.E3.SCF.FBOX    | (at1g23390): kelch repeat-containing F-box family protein                                             |
| LesAffx.54132.1.S1_at | BM535606   | AT3G45620.1 | TC23181 | IV  | -1.15 | -0.71 | 29.5.11.4.95 | protein.degradation.ubiquitin.E3.unspecified | (at3g45620): transducin family protein / WD-40 repeat family protein                                  |
| Les.4819.1.S1_at      | BT013586.1 | AT5G02500.2 | TC24267 | I   | 1.86  | 0.27  | 29.6         | protein.folding                              | (at5g02500): HSC70-1 (heat shock cognate 70 kDa protein 1); ATP binding                               |
| LesAffx.22583.1.S1_at | AI484022   | AT1G77810.2 | TC23670 | I   | 1.95  | 1.48  | 29.7         | protein.glycosylation                        | (at1g77810): galactosyltransferase family protein                                                     |



|                       |            |             |         |     |       |       |              |                                                                                                        |                                                                                                                                                                                                                                                                                           |
|-----------------------|------------|-------------|---------|-----|-------|-------|--------------|--------------------------------------------------------------------------------------------------------|-------------------------------------------------------------------------------------------------------------------------------------------------------------------------------------------------------------------------------------------------------------------------------------------|
| LesAffx.41816.1.S1_at | AW649474   | AT1G65590.1 | TC22094 | IV  | -1.11 | -0.45 | 29.7.8       | protein.glycosylation.alpha-1,6-mannosyl-glycoprotein-beta-1,2-N-acetylglucosaminyltransferase(GnT II) | (at1g65590): glycosyl hydrolase family 20 protein                                                                                                                                                                                                                                         |
| Les.2899.1.S1_at      | BG628131   | AT5G61640.1 | TC22810 | I   | 2.36  | 1.89  | 29.4         | protein.postranslational modification                                                                  | (at5g61640): PMSR1 (PEPTIDEMETHIONINE SULFOXIDE REDUCTASE 1); protein-methionine-S-oxide reductase                                                                                                                                                                                        |
| Les.31.1.S1_s_at      | AF110518.1 | AT5G03730.1 | NP00011 | I   | 1.2   | 0.36  | 29.4         | protein.postranslational modification                                                                  | (at5g03730): CTR1 (CONSTITUTIVE TRIPLE RESPONSE 1); kinase                                                                                                                                                                                                                                |
| LesAffx.47179.1.S1_at | BM411655   | AT1G03920.1 | TC24073 | I   | 1.37  | 0.75  | 29.4         | protein.postranslational modification                                                                  | (at1g03920): protein kinase, putative                                                                                                                                                                                                                                                     |
| LesAffx.27440.1.S1_at | BM410131   | AT1G68830.1 | TC23837 | VI  | -0.94 | -1.07 | 29.4         | protein.postranslational modification                                                                  | (at1g68830): STN7 (STT7 HOMOLOG STN7); kinase/ protein kinase                                                                                                                                                                                                                             |
| LesAffx.65695.2.A1_at | AI484733   | AT5G40540.1 | TC23451 | VI  | -1.16 | -1.05 | 29.4         | protein.postranslational modification                                                                  | (at5g40540): protein kinase, putative                                                                                                                                                                                                                                                     |
| LesAffx.41333.2.S1_at | AW934014   | AT1G07430.1 | TC23167 | V   | 0.03  | -1.21 | 29.4         | protein.postranslational modification                                                                  | (at1g07430): protein phosphatase 2C, putative / PP2C, putative                                                                                                                                                                                                                            |
| LesAffx.66270.1.S1_at | BM410146   | AT5G01820.1 | TC23074 | V   | -0.51 | -1.13 | 29.4         | protein.postranslational modification                                                                  | (at5g01820): ATSR1 (SERINE/THREONINE PROTEIN KINASE 1); kinase                                                                                                                                                                                                                            |
| Les.150.1.S1_at       | BT013117.1 | AT3G01490.1 | AW65015 | III | 0.65  | 1.15  | 29.4         | protein.postranslational modification                                                                  | (at3g01490): protein kinase, putative                                                                                                                                                                                                                                                     |
| LesAffx.53506.1.S1_at | BI206456   | AT5G59770.1 | TC22555 | IV  | -1.06 | 0.15  | 29.4         | protein.postranslational modification                                                                  | (at5g59770): similar to PAS2 (PASTICCINO 2) [Arabidopsis thaliana] (TAIR:AT5G10480.2); similar to Protein tyrosine phosphatase-like protein, PTPLA [Medicago truncatula] (GB:ABE85916.1); contains InterPro domain Protein tyrosine phosphatase-like protein, PTPLA; (InterPro:IPR007482) |
| Les.5160.1.S1_at      | BT013410.1 | AT1G56720.3 | TC23771 | IV  | -1.15 | -0.17 | 29.4.1.55    | protein.postranslational modification.kinase.receptor like cytoplasmatic kinase V                      | (at1g56720): protein kinase family protein                                                                                                                                                                                                                                                |
| Les.4696.1.S1_at      | BT014502.1 | AT5G56460.1 | TC22932 | VI  | -1.51 | -1.33 | 29.4.1.57    | protein.postranslational modification.kinase.receptor like cytoplasmatic kinase VII                    | (at5g56460): protein kinase, putative                                                                                                                                                                                                                                                     |
| Les.2571.1.S1_at      | CN384497   | AT5G56670.1 | TC23740 | III | 0.83  | 0.99  | 29.2.1.2.1.3 | protein.synthesis.ribosomal protein.eukaryotic.40S subunit.S30                                         | (at5g56670): 40S ribosomal protein S30 (RPS30C)                                                                                                                                                                                                                                           |

|                       |            |             |         |     |       |       |              |                                                                                      |                                                                                                                                                                                                                                                        |
|-----------------------|------------|-------------|---------|-----|-------|-------|--------------|--------------------------------------------------------------------------------------|--------------------------------------------------------------------------------------------------------------------------------------------------------------------------------------------------------------------------------------------------------|
| LesAffx.58481.1.A1_at | BM535000   | AT5G39785.2 | TC23994 | V   | -0.34 | -1.73 | 29.2.1.2.2.3 | protein.synthesis.ribosomal<br>protein.eukaryotic.60S subunit.L34                    | (at5g39785): similar to unknown protein [Arabidopsis thaliana] (TAIR:AT1G69610.1); similar to conserved hypothetical protein [Medicago truncatula] (GB:ABD32213.1); contains InterPro domain Protein of unknown function DUF1666; (InterPro:IPR012870) |
| Les.1444.1.S1_at      | AI777910   | AT5G24510.1 | TC22510 | III | 0.9   | 1.11  | 29.2.1.2.2.8 | protein.synthesis.ribosomal<br>protein.eukaryotic.60S subunit.P1                     | (at5g24510): 60s acidic ribosomal protein P1, putative                                                                                                                                                                                                 |
| LesAffx.13365.1.S1_at | BM411110   | AT3G01740.1 | TC21920 | I   | 2.41  | 0.26  | 29.2.1.1.2.2 | protein.synthesis.ribosomal<br>protein.prokaryotic.mitochondrion.<br>50S subunit.L37 | (at3g01740): similar to unknown protein [Arabidopsis thaliana] (TAIR:AT5G14290.1); similar to conserved hypothetical protein [Medicago truncatula] (GB:ABE80353.1)                                                                                     |
| Les.4542.1.A1_at      | BT014515.1 | AT5G03940.1 | DB71533 | VI  | -0.7  | -1.1  | 29.3.3       | protein.targeting.chloroplast                                                        | (at5g03940): FFC (FIFTY-FOUR CHLOROPLAST HOMOLOGUE); 7S RNA binding / GTP binding / mRNA binding                                                                                                                                                       |
| Les.2568.1.S1_at      | BI922309   | AT2G24820.1 | TC23413 | V   | -0.54 | -1.38 | 29.3.3       | protein.targeting.chloroplast                                                        | (at2g24820): TIC55 (TRANSLOCON AT THE INNER ENVELOPE MEMBRANE OF CHLOROPLASTS 55); oxidoreductase                                                                                                                                                      |
| Les.2364.1.S1_at      | CN385609   | AT1G61570.1 | TC23659 | III | 0.94  | 0.94  | 29.3.2       | protein.targeting.mitochondria                                                       | (at1g61570): TIM13 (TIM13); protein translocase                                                                                                                                                                                                        |
| Les.4096.1.S1_at      | AW220281   | AT5G50810.1 | TC22846 | III | 0.67  | 1.15  | 29.3.2       | protein.targeting.mitochondria                                                       | (at5g50810): TIM8 (Arabidopsis thaliana translocase inner membrane subunit 8); protein translocase                                                                                                                                                     |
| LesAffx.53698.1.S1_at | BG127688   | AT3G24570.1 | EG55334 | I   | 1.31  | 1.03  | 29.3.5       | protein.targeting.peroxisomes                                                        | (at3g24570): peroxisomal membrane 22 kDa family protein                                                                                                                                                                                                |
| LesAffx.43793.1.A1_at | BI206057   | AT3G25160.1 | TC23097 | III | 1.05  | 1.19  | 29.3.4.1     | protein.targeting.secretory<br>pathway.ER                                            | (at3g25160): ER lumen protein retaining receptor family protein                                                                                                                                                                                        |
| LesAffx.52595.1.S1_at | AI778688   | AT1G72280.1 | TC22841 | III | 1.37  | 1.41  | 29.3.4.1     | protein.targeting.secretory<br>pathway.ER                                            | (at1g72280): AERO1 (ARABIDOPSIS ENDOPLASMIC RETICULUM OXIDOREDUCTINS 1)                                                                                                                                                                                |
| Les.3086.2.S1_at      | CN385936   | AT3G60540.2 | TC22850 | III | 0.92  | 1.03  | 29.3.4.99    | protein.targeting.secretory<br>pathway.unspecified                                   | (at3g60540): sec61beta family protein                                                                                                                                                                                                                  |
| Les.3415.3.S1_at      | AI779314   | AT2G47400.1 | TC24218 | II  | -0.41 | 1.35  | 1.3          | PS.calvin cyle                                                                       | (at2g47400): CP12-1 (CP12 domain-containing protein 1)                                                                                                                                                                                                 |
| Les.3174.1.S1_at      | BT012701.1 | AT4G38970.1 | TC22568 | V   | 0.01  | -1.32 | 1.3.6        | PS.calvin cyle.aldolase                                                              | (at4g38970): fructose-bisphosphate aldolase, putative                                                                                                                                                                                                  |

|                       |            |             |         |    |       |       |        |                                    |                                                                                                                                  |
|-----------------------|------------|-------------|---------|----|-------|-------|--------|------------------------------------|----------------------------------------------------------------------------------------------------------------------------------|
| Les.2024.1.A1_at      | BG631036   | AT3G54050.1 | TC23275 | V  | -0.88 | -1.52 | 1.3.7  | PS.calvin cyle.FBPase              | (at3g54050): fructose-1,6-bisphosphatase, putative / D-fructose-1,6-bisphosphate 1-phosphohydrolase, putative / FBPase, putative |
| Les.3072.1.S1_at      | BG627918   | AT1G12900.2 | TC23388 | VI | -0.79 | -1.1  | 1.3.4  | PS.calvin cyle.GAP                 | (at1g12900): GAPA-2; glyceraldehyde-3-phosphate dehydrogenase                                                                    |
| Les.2888.1.S1_at      | AI491181   | AT1G12900.1 | TC22589 | V  | -0.63 | -1.53 | 1.3.4  | PS.calvin cyle.GAP                 | (at1g12900): GAPA-2; glyceraldehyde-3-phosphate dehydrogenase                                                                    |
| Les.2933.1.S1_at      | BT012764.1 | AT1G42970.1 | TC23454 | V  | -1.15 | -2    | 1.3.4  | PS.calvin cyle.GAP                 | (at1g42970): GAPB (GLYCERALDEHYDE-3-PHOSPHATE DEHYDROGENASE B SUBUNIT); glyceraldehyde-3-phosphate dehydrogenase                 |
| Les.424.1.S1_at       | BG628349   | AT1G32060.1 | TC22847 | V  | -0.66 | -2.02 | 1.3.12 | PS.calvin cyle.PRK                 | (at1g32060): PRK (PHOSPHORIBULOKINASE); ATP binding / phosphoribulokinase/ protein binding                                       |
| LesAffx.50610.1.S1_at | AI775987   | AT4G20130.1 | TC24497 | VI | -1.18 | -1.11 | 1.3.13 | PS.calvin cyle.rubisco interacting | (at4g20130): PTAC14 (PLASTID TRANSCRIPTIONALLY ACTIVE14)                                                                         |
| Les.4493.1.S1_at      | BG734807   | AT2G39730.3 | TC22690 | V  | -0.83 | -1.53 | 1.3.13 | PS.calvin cyle.rubisco interacting | (at2g39730): RCA (RUBISCO ACTIVASE)                                                                                              |

|                      |          |             |         |    |       |       |         |                                                                            |                                                                                                                                                                                                                                                                                                                                                                                                                                                                                                                                                                                                                                                                                                                                                                                                                                                                                                                                                                                                                  |
|----------------------|----------|-------------|---------|----|-------|-------|---------|----------------------------------------------------------------------------|------------------------------------------------------------------------------------------------------------------------------------------------------------------------------------------------------------------------------------------------------------------------------------------------------------------------------------------------------------------------------------------------------------------------------------------------------------------------------------------------------------------------------------------------------------------------------------------------------------------------------------------------------------------------------------------------------------------------------------------------------------------------------------------------------------------------------------------------------------------------------------------------------------------------------------------------------------------------------------------------------------------|
| Les.376.1.S1_at      | BG627516 | AT1G67090.1 | TC24390 | V  | -0.64 | -1.3  | 1.3.2   | PS.calvin cyle.rubisco small subunit                                       | MULTIPLE HITS:<br>(at5g38420,at5g38430,at5g38410,at1g67090).<br>at5g38420: ribulose biphosphate carboxylase small chain 2B / RuBisCO small subunit 2B (RBCS-2B) (ATS2B) at5g38430: ribulose biphosphate carboxylase small chain 1B / RuBisCO small subunit 1B (RBCS-1B) (ATS1B) at5g38410: ribulose biphosphate carboxylase small chain 3B / RuBisCO small subunit 3B (RBCS-3B) (ATS3B); Identical to Ribulose biphosphate carboxylase small chain 3B, chloroplast precursor (RBCS-3B) [Arabidopsis Thaliana] (GB:P10798;GB:Q9FF21); similar to ribulose biphosphate carboxylase small chain 2B / RuBisCO small subunit 2B (RBCS-2B) (ATS2B) [Arabidopsis thaliana] (TAIR:AT5G38420.1); similar to Ribulose biphosphate carboxylase small chain, chloroplast precursor (RuBisCO small subunit) (GB:P08135); contains InterPro domain Ribulose biphosphate carboxylase, small chain; (InterPro:IPR000894) at1g67090: ribulose biphosphate carboxylase small chain 1A / RuBisCO small subunit 1A (RBCS-1A) (ATS1A) |
| Les.4615.1.S1_at     | BE462687 | AT2G31040.1 | TC22537 | IV | -1.23 | 0.01  | 1.1.4   | PS.lightreaction.ATP synthase                                              | (at2g31040): ATP synthase protein I -related                                                                                                                                                                                                                                                                                                                                                                                                                                                                                                                                                                                                                                                                                                                                                                                                                                                                                                                                                                     |
| Les.1832.1.A1_at     | BG629451 | AT2G05620.1 | TC23307 | V  | 0.62  | -1.56 | 1.1.40  | PS.lightreaction.cyclic electron flow-chlororespiration                    | (at2g05620): PGR5 (PROTON GRADIENT REGULATION 5)                                                                                                                                                                                                                                                                                                                                                                                                                                                                                                                                                                                                                                                                                                                                                                                                                                                                                                                                                                 |
| Les.3234.1.A1_at     | BG735047 | AT1G60950.1 | TC23423 | V  | -0.06 | -1.05 | 1.1.5.2 | PS.lightreaction.other electron carrier (ox/red).ferredoxin                | (at1g60950): FED A (FERREDOXIN 2); electron carrier/ iron ion binding                                                                                                                                                                                                                                                                                                                                                                                                                                                                                                                                                                                                                                                                                                                                                                                                                                                                                                                                            |
| LesAffx.5776.1.S1_at | BG127982 | AT3G09150.2 | BG12798 | VI | -1.43 | -1.14 | 1.1.5.4 | PS.lightreaction.other electron carrier (ox/red).ferredoxin oxidoreductase | (at3g09150): HY2 (ELONGATED HYPOCOTYL 2); phytochromobilin:ferredoxin oxidoreductase                                                                                                                                                                                                                                                                                                                                                                                                                                                                                                                                                                                                                                                                                                                                                                                                                                                                                                                             |
| Les.4259.1.S1_at     | BG629037 | AT1G61520.2 | TC24424 | VI | -1.37 | -1.51 | 1.1.2.1 | PS.lightreaction.photosystem I.LHC-I                                       | (at1g61520): LHCA3 (Photosystem I light harvesting complex gene 3); chlorophyll binding                                                                                                                                                                                                                                                                                                                                                                                                                                                                                                                                                                                                                                                                                                                                                                                                                                                                                                                          |

|                    |            |             |         |    |       |       |         |                                                           |                                                                                                                                                                                                                            |
|--------------------|------------|-------------|---------|----|-------|-------|---------|-----------------------------------------------------------|----------------------------------------------------------------------------------------------------------------------------------------------------------------------------------------------------------------------------|
| Les.3297.1.S1_at   | BG630303   | AT3G47470.1 | TC21776 | V  | -1.18 | -2.2  | 1.1.2.1 | PS.lightreaction.photosystem I.LHC-I                      | (at3g47470): LHCA4 (Photosystem I light harvesting complex gene 4); chlorophyll binding                                                                                                                                    |
| Les.4083.1.S1_at   | BG735070   | AT3G61470.1 | TC22596 | V  | -0.6  | -1.25 | 1.1.2.1 | PS.lightreaction.photosystem I.LHC-I                      | MULTIPLE HITS: (at3g61470,at5g28450). at3g61470: LHCA2 (Photosystem I light harvesting complex gene 2); chlorophyll binding at5g28450: chlorophyll A-B binding protein, chloroplast, putative / LHCI type II CAB, putative |
| Les.3038.1.S1_at   | AW094037   | AT2G46820.2 | TC22677 | VI | -0.66 | -1.08 | 1.1.2.2 | PS.lightreaction.photosystem I.PSI polypeptide subunits   | (at2g46820): TMP14 (THYLAKOID MEMBRANE PHOSPHOPROTEIN OF 14 KDA)                                                                                                                                                           |
| Les.2168.1.S1_at   | BT013274.1 | AT5G64040.1 | TC23964 | V  | -1.3  | -2.6  | 1.1.2.2 | PS.lightreaction.photosystem I.PSI polypeptide subunits   | (at5g64040): PSAN (photosystem I reaction center subunit PSI-N); calmodulin binding                                                                                                                                        |
| Les.4508.1.S1_s_at | AI780576   | AT1G08380.1 | BG12438 | V  | -0.59 | -2.1  | 1.1.2.2 | PS.lightreaction.photosystem I.PSI polypeptide subunits   | (at1g08380): PSAO (photosystem I subunit O)                                                                                                                                                                                |
| Les.5157.1.S1_at   | BT013405.1 | AT1G08380.1 | TC23882 | V  | -0.48 | -1.69 | 1.1.2.2 | PS.lightreaction.photosystem I.PSI polypeptide subunits   | (at1g08380): PSAO (photosystem I subunit O)                                                                                                                                                                                |
| Les.4492.2.S1_at   | CK714954   | AT1G15820.1 | TC22356 | VI | -0.77 | -1.1  | 1.1.1.1 | PS.lightreaction.photosystem II.LHC-II                    | (at1g15820): LHCB6 (LIGHT HARVESTING COMPLEX PSII); chlorophyll binding                                                                                                                                                    |
| Les.147.1.S1_at    | BG629070   | AT3G27690.1 | TC22473 | V  | -0.35 | -1.95 | 1.1.1.1 | PS.lightreaction.photosystem II.LHC-II                    | (at3g27690): LHCB2:4 (Photosystem II light harvesting complex gene 2.3); chlorophyll                                                                                                                                       |
| Les.233.1.S1_at    | M17558.1   | AT3G27690.1 | TC23200 | V  | -0.87 | -1.86 | 1.1.1.1 | PS.lightreaction.photosystem II.LHC-II                    | (at3g27690): LHCB2:4 (Photosystem II light harvesting complex gene 2.3); chlorophyll                                                                                                                                       |
| Les.3016.1.S1_at   | BT012757.1 | AT5G54270.1 | TC24030 | V  | -1.31 | -2.74 | 1.1.1.1 | PS.lightreaction.photosystem II.LHC-II                    | (at5g54270): LHCB3 (LIGHT-HARVESTING CHLOROPHYLL BINDING PROTEIN 3)                                                                                                                                                        |
| Les.3054.1.S1_at   | AI773693   | AT5G54270.1 | TC23429 | V  | -1.16 | -2.7  | 1.1.1.1 | PS.lightreaction.photosystem II.LHC-II                    | (at5g54270): LHCB3 (LIGHT-HARVESTING CHLOROPHYLL BINDING PROTEIN 3)                                                                                                                                                        |
| Les.608.1.S1_at    | BG628276   | AT4G10340.1 | TC21796 | V  | -0.69 | -1.41 | 1.1.1.1 | PS.lightreaction.photosystem II.LHC-II                    | (at4g10340): LHCB5 (LIGHT HARVESTING COMPLEX OF PHOTOSYSTEM II 5); chlorophyll binding                                                                                                                                     |
| Les.4007.1.S1_at   | BG629658   | AT3G50820.1 | TC22991 | VI | -1.38 | -1.03 | 1.1.1.2 | PS.lightreaction.photosystem II.PSII polypeptide subunits | (at3g50820): PSBO-2/PSBO2 (PHOTOSYSTEM II SUBUNIT O-2); oxygen evolving                                                                                                                                                    |
| Les.482.1.S1_at    | BG630028   | AT1G06680.1 | TC22380 | VI | -0.8  | -1.03 | 1.1.1.2 | PS.lightreaction.photosystem II.PSII polypeptide subunits | (at1g06680): PSBP-1 (OXYGEN-EVOLVING ENHANCER PROTEIN 2); calcium ion binding                                                                                                                                              |
| Les.1923.1.S1_at   | BG630193   | AT1G77090.1 | TC23497 | V  | -0.56 | -1.54 | 1.1.1.2 | PS.lightreaction.photosystem II.PSII polypeptide subunits | (at1g77090): thylakoid lumenal 29.8 kDa protein                                                                                                                                                                            |

|                       |            |             |         |     |       |       |          |                                                                                                        |                                                                                                                               |
|-----------------------|------------|-------------|---------|-----|-------|-------|----------|--------------------------------------------------------------------------------------------------------|-------------------------------------------------------------------------------------------------------------------------------|
| Les.3073.1.S1_at      | AJ785415   | AT1G44575.1 | TC21760 | V   | -0.71 | -1.41 | 1.1.1.2  | PS.lightreaction.photosystem II.PSII polypeptide subunits                                              | (at1g44575): NPQ4 (NONPHOTOCHEMICAL QUENCHING)                                                                                |
| LesAffx.17387.1.S1_at | BM534931   | AT1G06620.1 | BM53493 | III | 0.95  | 1.4   | 21.2     | redox.ascorbate and glutathione                                                                        | (at1g06620): 2-oxoglutarate-dependent dioxygenase, putative                                                                   |
| LesAffx.69349.2.S1_at | AW623862   | AT4G18260.1 | AW62386 | III | 1.87  | 1.95  | 21.2     | redox.ascorbate and glutathione                                                                        | (at4g18260): cytochrome B561-related                                                                                          |
| LesAffx.3918.1.S1_at  | BM410706   | AT3G09640.2 | TC21958 | V   | 0.2   | -1.27 | 21.2.1   | redox.ascorbate and glutathione.ascorbate                                                              | (at3g09640): APX2 (ASCORBATE PEROXIDASE 2); L-ascorbate peroxidase                                                            |
| Les.3214.1.S1_at      | BG631018   | AT5G28840.1 | TC21991 | VI  | -1.02 | -1.19 | 21.2.1.1 | redox.ascorbate and glutathione.ascorbate.GME                                                          | (at5g28840): GME (GDP-D-MANNOSE 3',5'-EPIMERASE); GDP-mannose 3,5-epimerase/ NAD binding / catalytic                          |
| Les.3549.1.A1_at      | AF096252.1 | AT4G35090.2 | TC23183 | V   | -0.56 | -1.29 | 21.6     | redox.dismutases and catalases                                                                         | (at4g35090): CAT2 (CATALASE 2); catalase                                                                                      |
| Les.4270.1.S1_at      | AF112368.1 | AT4G35090.1 | TC23183 | V   | -0.55 | -1.21 | 21.6     | redox.dismutases and catalases                                                                         | (at4g35090): CAT2 (CATALASE 2); catalase                                                                                      |
| Les.170.1.S1_at       | AY026344.1 | AT3G10520.1 | TC22471 | II  | 0.28  | 1.07  | 21.3     | redox.heme                                                                                             | (at3g10520): AHB2 (NON-SYMBIOTIC HAEMOGLOBIN 2)                                                                               |
| Les.3700.1.S1_at      | AY026343.1 | AT2G16060.1 | TC22149 | II  | 0.24  | 1.74  | 21.3     | redox.heme                                                                                             | (at2g16060): AHB1 (ARABIDOPSIS HEMOGLOBIN 1)                                                                                  |
| Les.5597.1.S1_at      | BT014226.1 | AT1G77510.1 | AW09450 | II  | 0.17  | 1.49  | 21.1     | redox.thioredoxin                                                                                      | (at1g77510): ATPDIL1-2 (PDI-LIKE 1-2); protein disulfide isomerase                                                            |
| LesAffx.66600.1.A1_at | AW036163   | AT3G02730.1 | TC23173 | V   | -0.32 | -1.12 | 21.1     | redox.thioredoxin                                                                                      | (at3g02730): ATF1/TRXF1 (THIOREDOXIN F-TYPE 1); thiol-disulfide exchange intermediate                                         |
| LesAffx.55662.1.S1_at | AW625299   | AT1G07960.1 | TC24518 | III | 0.99  | 1.05  | 21.1     | redox.thioredoxin                                                                                      | (at1g07960): ATPDIL5-1 (PDI-LIKE 5-1); thiol-disulfide exchange intermediate                                                  |
| Les.50.1.S1_at        | X79338.1   | AT2G02990.1 | TC22030 | II  | 0.84  | 2.2   | 27.1.19  | RNA.processing.ribonucleases                                                                           | (at2g02990): RNS1 (RIBONUCLEASE 1); endoribonuclease                                                                          |
| Les.5958.1.S1_at      | CN384731   | AT3G44260.1 | TC23315 | III | 1.22  | 1.39  | 27.1.19  | RNA.processing.ribonucleases                                                                           | (at3g44260): CCR4-NOT transcription complex protein, putative                                                                 |
| Les.3210.1.S1_at      | AI483637   | AT1G26820.1 | TC22662 | V   | -0.25 | -1.59 | 27.1.19  | RNA.processing.ribonucleases                                                                           | (at1g26820): RNS3 (RIBONUCLEASE 3); endoribonuclease                                                                          |
| Les.3286.1.S1_at      | BT013249.1 | AT3G20390.1 | TC23425 | V   | 0.06  | -2.18 | 27.1.19  | RNA.processing.ribonucleases                                                                           | (at3g20390): endoribonuclease L-PSP family protein                                                                            |
| LesAffx.20450.1.S1_at | AW223514   | AT3G16770.1 | TC21776 | III | 1.27  | 1.11  | 27.3.3   | RNA.regulation of transcription.AP2/EREBP, APETALA2/Ethylene-responsive element binding protein family | (at3g16770): ATEBP/RAP2.3 (RELATED TO AP2 3); DNA binding / protein binding / transcription factor/ transcriptional activator |

|                         |            |             |         |     |       |       |         |                                                                                                        |                                                                                                                                  |
|-------------------------|------------|-------------|---------|-----|-------|-------|---------|--------------------------------------------------------------------------------------------------------|----------------------------------------------------------------------------------------------------------------------------------|
| LesAffx.64978.1.S1_at   | CN385434   | AT5G67190.1 | FS18759 | III | 1.32  | 1.17  | 27.3.3  | RNA.regulation of transcription.AP2/EREBP, APETALA2/Ethylene-responsive element binding protein family | (at5g67190): AP2 domain-containing transcription factor, putative                                                                |
| Les.305.2.S1_at         | CD002775   | AT2G27040.1 | TC23749 | VI  | -1.58 | -1.72 | 27.3.36 | RNA.regulation of transcription.Argonaute                                                              | (at2g27040): AGO4 (ARGONAUTE 4)                                                                                                  |
| LesAffx.16472.1.S1_at   | AI774397   | AT1G31320.1 | TC24204 | IV  | -2.14 | -0.56 | 27.3.37 | RNA.regulation of transcription.AS2,Lateral Organ Boundaries Gene Family                               | (at1g31320): LOB domain protein 4 / lateral organ boundaries domain protein 4 (LBD4)                                             |
| Les.3706.1.A1_at        | AF022014.1 | AT4G14560.1 | TC21953 | II  | 0.12  | 1.21  | 27.3.40 | RNA.regulation of transcription.Aux/IAA family                                                         | (at4g14560): IAA1 (INDOLE-3-ACETIC ACID INDUCIBLE); transcription factor                                                         |
| Les.5442.1.S1_at        | BT013931.1 | AT4G32280.1 | TC22814 | III | 2.11  | 3.53  | 27.3.40 | RNA.regulation of transcription.Aux/IAA family                                                         | (at4g32280): IAA29 (indoleacetic acid-induced protein 29); transcription factor                                                  |
| Les.4097.1.A1_at        | AF022018.1 | AT4G14550.1 | TC22516 | VI  | -1.3  | -1.49 | 27.3.40 | RNA.regulation of transcription.Aux/IAA family                                                         | (at4g14550): IAA14 (SOLITARY ROOT); transcription factor                                                                         |
| Les.4085.1.S1_at        | BE459897   | AT2G27230.2 | TC23484 | VI  | -0.89 | -1.45 | 27.3.6  | RNA.regulation of transcription.bHLH,Basic Helix-Loop-Helix family                                     | (at2g27230): transcription factor-related                                                                                        |
| LesAffx.64675.1.S1_a_at | CN385903   | AT5G57150.3 | TC21939 | VI  | -1.17 | -0.82 | 27.3.6  | RNA.regulation of transcription.bHLH,Basic Helix-Loop-Helix family                                     | (at5g57150): basic helix-loop-helix (bHLH) family protein                                                                        |
| Les.3543.1.S1_at        | AJ011914.1 | AT5G11260.1 | TC23261 | I   | 1.09  | 0.75  | 27.3.35 | RNA.regulation of transcription.bZIP transcription factor family                                       | (at5g11260): HY5 (ELONGATED HYPOCOTYL 5); DNA binding / transcription factor                                                     |
| Les.5916.1.S1_at        | AJ715788.1 | AT3G62420.1 | TC23545 | III | 1.24  | 1.25  | 27.3.35 | RNA.regulation of transcription.bZIP transcription factor family                                       | (at3g62420): ATBZIP53 (BASIC REGION/LEUCINE ZIPPER MOTIF 53); DNA binding / sequence-specific DNA binding / transcription factor |
| LesAffx.65689.1.A1_at   | AI486980   | AT5G24800.1 | TC22449 | V   | -0.14 | -1.14 | 27.3.35 | RNA.regulation of transcription.bZIP transcription factor family                                       | (at5g24800): BZO2H2 (basic leucine zipper O2 homolog 2); DNA binding / transcription factor                                      |
| LesAffx.67368.1.S1_at   | BG126810   | AT5G06950.4 | BG12681 | V   | -0.88 | -1.53 | 27.3.35 | RNA.regulation of transcription.bZIP transcription factor family                                       | (at5g06950): AHBP-1B (bZIP transcription factor HBP-1b homolog); DNA binding / transcription factor                              |

|                       |            |             |         |     |       |       |         |                                                                                    |                                                                                                                      |
|-----------------------|------------|-------------|---------|-----|-------|-------|---------|------------------------------------------------------------------------------------|----------------------------------------------------------------------------------------------------------------------|
| Les.3376.1.A1_at      | BG630058   | AT1G06040.1 | TC21732 | V   | -0.46 | -2.49 | 27.3.7  | RNA.regulation of transcription.C2C2(Zn) CO-like, Constans-like zinc finger family | (at1g06040): STO (SALT TOLERANCE); transcription factor/ zinc ion binding                                            |
| LesAffx.18330.1.S1_at | BG129699   | AT5G57660.1 | TC24342 | V   | -0.67 | -1.52 | 27.3.7  | RNA.regulation of transcription.C2C2(Zn) CO-like, Constans-like zinc finger family | (at5g57660): zinc finger (B-box type) family protein                                                                 |
| LesAffx.71242.2.S1_at | AW093460   | AT1G73870.1 | TC22502 | V   | -0.9  | -1.64 | 27.3.7  | RNA.regulation of transcription.C2C2(Zn) CO-like, Constans-like zinc finger family | (at1g73870): zinc finger (B-box type) family protein                                                                 |
| LesAffx.71503.1.S1_at | AW648310   | AT5G60200.1 | TC22254 | IV  | -1.51 | -0.84 | 27.3.8  | RNA.regulation of transcription.C2C2(Zn) DOF zinc finger family                    | (at5g60200): Dof-type zinc finger domain-containing protein                                                          |
| LesAffx.14110.2.A1_at | AW932597   | AT3G47500.1 | TC23949 | V   | -0.77 | -1.81 | 27.3.8  | RNA.regulation of transcription.C2C2(Zn) DOF zinc finger family                    | (at3g47500): CDF3 (CYCLING DOF FACTOR 3); DNA binding / protein binding / transcription factor                       |
| LesAffx.70928.1.S1_at | BI209612   | AT3G24050.1 | TC23336 | III | 1.08  | 1.07  | 27.3.9  | RNA.regulation of transcription.C2C2(Zn) GATA transcription factor family          | (at3g24050): GATA transcription factor 1 (GATA-1)                                                                    |
| LesAffx.54718.1.S1_at | BM411779   | AT3G54810.1 | TC22617 | VI  | -1.26 | -0.99 | 27.3.9  | RNA.regulation of transcription.C2C2(Zn) GATA transcription factor family          | (at3g54810): BME3/BME3-ZF (BLUE MICROPLYLAR END3); transcription factor                                              |
| LesAffx.22830.1.S1_at | CN385777   | AT3G28210.1 | TC22584 | I   | 1.7   | 1.28  | 27.3.11 | RNA.regulation of transcription.C2H2 zinc finger family                            | (at3g28210): PMZ; zinc ion binding                                                                                   |
| LesAffx.71311.1.S1_at | CN384672   | AT2G37430.1 | TC22685 | I   | 1.39  | 0.55  | 27.3.11 | RNA.regulation of transcription.C2H2 zinc finger family                            | (at2g37430): zinc finger (C2H2 type) family protein (ZAT11)                                                          |
| Les.5126.1.S1_at      | BT013336.1 | AT3G19580.2 | TC22310 | III | 1.49  | 1.55  | 27.3.11 | RNA.regulation of transcription.C2H2 zinc finger family                            | (at3g19580): AZF2 (ARABIDOPSIS ZINC-FINGER PROTEIN 2); nucleic acid binding / transcription factor/ zinc ion binding |
| LesAffx.36193.1.S1_at | AW034622   | AT5G04340.1 | TC22914 | III | 1.57  | 1.7   | 27.3.11 | RNA.regulation of transcription.C2H2 zinc finger family                            | (at5g04340): C2H2; nucleic acid binding / transcription factor/ zinc ion binding                                     |
| LesAffx.51298.1.S1_at | BI422808   | AT2G28710.1 | TC21917 | III | 1.22  | 2.01  | 27.3.11 | RNA.regulation of transcription.C2H2 zinc finger family                            | (at2g28710): zinc finger (C2H2 type) family protein                                                                  |



|                       |            |             |         |     |       |       |         |                                                                            |                                                                                                                                                     |
|-----------------------|------------|-------------|---------|-----|-------|-------|---------|----------------------------------------------------------------------------|-----------------------------------------------------------------------------------------------------------------------------------------------------|
| Les.2608.1.S1_at      | BT014160.1 | AT3G02830.1 | TC23356 | V   | -0.6  | -1.07 | 27.3.11 | RNA.regulation of transcription.C2H2 zinc finger family                    | (at3g02830): ZFN1 (ZINC FINGER PROTEIN 1); nucleic acid binding                                                                                     |
| LesAffx.68092.1.S1_at | BE459012   | AT3G46640.2 | TC22815 | III | 0.89  | 1.79  | 27.3.20 | RNA.regulation of transcription.G2-like transcription factor family, GARP  | MULTIPLE HITS: (at5g59570,at3g46640). at5g59570: myb family transcription factor at3g46640: PCL1 (PHYTOCLOCK 1); DNA binding / transcription factor |
| LesAffx.51158.1.S1_at | AI897068   | AT2G18550.1 | TC23014 | I   | 1.4   | 0.98  | 27.3.22 | RNA.regulation of transcription.HB,Homeobox transcription factor family    | (at2g18550): ATHB21/HB-2 (homeobox-2); DNA binding / transcription factor                                                                           |
| LesAffx.2632.2.S1_at  | BI205756   | AT2G22800.1 | TC23448 | II  | 0.08  | 0.99  | 27.3.22 | RNA.regulation of transcription.HB,Homeobox transcription factor family    | (at2g22800): HAT9 (homeobox-leucine zipper protein 9); DNA binding / transcription factor                                                           |
| Les.5941.1.A1_at      | CK715706   | AT1G52150.2 | TC22893 | IV  | -2.11 | -0.94 | 27.3.22 | RNA.regulation of transcription.HB,Homeobox transcription factor family    | (at1g52150): ATHB-15 (INCURVATA 4); DNA binding / transcription factor                                                                              |
| Les.70.1.S1_at        | AF000141.1 | AT1G62360.1 | NP00014 | VI  | -1.62 | -1.34 | 27.3.22 | RNA.regulation of transcription.HB,Homeobox transcription factor family    | (at1g62360): STM (SHOOT MERISTEMLESS); transcription factor                                                                                         |
| LesAffx.24696.1.S1_at | AW034874   | AT2G26150.1 | DB70637 | IV  | -1.23 | 0.43  | 27.3.23 | RNA.regulation of transcription.HSF,Heat-shock transcription factor family | (at2g26150): ATHSFA2 (Arabidopsis thaliana heat shock transcription factor A2); DNA binding / transcription factor                                  |
| LesAffx.56.6.S1_at    | BM536076   | AT3G22830.1 | TC23980 | IV  | -1.17 | 0.32  | 27.3.23 | RNA.regulation of transcription.HSF,Heat-shock transcription factor family | (at3g22830): AT-HSFA6B (Arabidopsis thaliana heat shock transcription factor A6B); DNA binding / transcription factor                               |
| Les.3833.1.S1_at      | AY098737.2 | AT1G71692.1 | TC22193 | III | 1.14  | 1.79  | 27.3.24 | RNA.regulation of transcription.MADS box transcription factor family       | (at1g71692): AGL12 (AGAMOUS-LIKE 12); transcription factor                                                                                          |
| Les.5091.1.A1_at      | BT013255.1 | AT3G23250.1 | TC22888 | I   | 1.28  | 0.08  | 27.3.25 | RNA.regulation of transcription.MYB domain transcription factor family     | (at3g23250): AtMYB15/AtY19/MYB15 (myb domain protein 15); DNA binding / transcription factor                                                        |
| LesAffx.62138.1.S1_at | AW737374   | AT5G49620.1 | TC24364 | III | 1.69  | 1.74  | 27.3.25 | RNA.regulation of transcription.MYB domain transcription factor family     | (at5g49620): AtMYB78 (myb domain protein 78); DNA binding / transcription factor                                                                    |

|                       |            |             |         |     |       |       |         |                                                                         |                                                                                                     |
|-----------------------|------------|-------------|---------|-----|-------|-------|---------|-------------------------------------------------------------------------|-----------------------------------------------------------------------------------------------------|
| Les.33.1.S1_at        | AF148934.1 | AT2G37630.1 | TC22018 | IV  | -2.26 | -0.53 | 27.3.25 | RNA.regulation of transcription.MYB domain transcription factor family  | (at2g37630): AS1 (ASYMMETRIC LEAVES 1); DNA binding / transcription factor                          |
| LesAffx.53591.1.S1_at | AI899018   | AT1G06180.1 | TC22292 | VI  | -2.05 | -1.68 | 27.3.25 | RNA.regulation of transcription.MYB domain transcription factor family  | (at1g06180): ATMYB13 (myb domain protein 13); DNA binding / transcription factor                    |
| LesAffx.54522.1.S1_at | BM411853   | AT2G23290.1 | TC22000 | VI  | -0.9  | -1.4  | 27.3.25 | RNA.regulation of transcription.MYB domain transcription factor family  | (at2g23290): AtMYB70 (myb domain protein 70); DNA binding / transcription factor                    |
| LesAffx.70738.1.A1_at | BG630069   | AT5G40350.1 | TC23199 | VI  | -1.77 | -1.8  | 27.3.25 | RNA.regulation of transcription.MYB domain transcription factor family  | (at5g40350): MYB24 (myb domain protein 24); DNA binding / transcription factor                      |
| Les.4895.1.S1_at      | BT012856.1 | AT5G04760.1 | TC23595 | I   | 1.02  | 0.38  | 27.3.26 | RNA.regulation of transcription.MYB-related transcription factor family | (at5g04760): myb family transcription factor                                                        |
| Les.2886.1.A1_at      | BG628514   | AT5G17300.1 | TC24034 | V   | 0.62  | -1.28 | 27.3.26 | RNA.regulation of transcription.MYB-related transcription factor family | (at5g17300): myb family transcription factor                                                        |
| Les.4923.1.S1_at      | BT012912.1 | AT1G01060.4 | TC22925 | V   | 0.22  | -2.9  | 27.3.26 | RNA.regulation of transcription.MYB-related transcription factor family | (at1g01060): LHY (LATE ELONGATED HYPOCOTYL); DNA binding / transcription factor                     |
| LesAffx.56221.1.S1_at | AI894713   | AT3G09600.2 | TC24290 | V   | -0.29 | -2.94 | 27.3.26 | RNA.regulation of transcription.MYB-related transcription factor family | (at3g09600): myb family transcription factor                                                        |
| LesAffx.1959.2.S1_at  | AW216683   | AT1G74840.1 | TC23208 | VI  | -1.1  | -0.83 | 27.3.26 | RNA.regulation of transcription.MYB-related transcription factor family | (at1g74840): myb family transcription factor                                                        |
| LesAffx.50112.1.S1_at | AI898985   | AT5G09800.1 | TC23361 | III | 1.36  | 1.51  | 27.3.64 | RNA.regulation of transcription.PHOR1                                   | (at5g09800): U-box domain-containing protein                                                        |
| LesAffx.63659.1.S1_at | BI921813   | AT3G18710.1 | TC22794 | III | 1.53  | 1.55  | 27.3.64 | RNA.regulation of transcription.PHOR1                                   | (at3g18710): U-box domain-containing protein                                                        |
| Les.2949.1.S1_at      | AJ515747.1 | AT2G29570.1 | TC21956 | II  | 0.17  | 1.03  | 27.3.67 | RNA.regulation of transcription.putative transcription regulator        | (at2g29570): PCNA2 (PROLIFERATING CELL NUCLEAR 2); DNA binding / DNA polymerase processivity factor |

|                       |            |             |         |     |       |       |         |                                                                                         |                                                                                                                                     |
|-----------------------|------------|-------------|---------|-----|-------|-------|---------|-----------------------------------------------------------------------------------------|-------------------------------------------------------------------------------------------------------------------------------------|
| LesAffx.20929.1.S1_at | BI206813   | AT2G41870.1 | TC23621 | V   | -0.39 | -1.52 | 27.3.67 | RNA.regulation of transcription.putative transcription regulator                        | (at2g41870): remorin family protein                                                                                                 |
| LesAffx.66014.1.S1_at | BI926363   | AT5G14260.1 | TC24281 | VI  | -0.75 | -1.04 | 27.3.69 | RNA.regulation of transcription.SET-domain transcriptional regulator family             | (at5g14260): SET domain-containing protein                                                                                          |
| LesAffx.43198.1.S1_at | BF113993   | AT5G67480.2 | BF11399 | III | 1.72  | 2.38  | 27.3.72 | RNA.regulation of transcription.Transcriptional Adaptor Zinc Bundle (TAZ) domain family | (at5g67480): BT4 (BTB AND TAZ DOMAIN PROTEIN 4); protein binding                                                                    |
| LesAffx.44609.1.S1_at | BG631285   | AT3G10040.1 | TC23469 | IV  | -2.11 | -0.57 | 27.3.30 | RNA.regulation of transcription.Trihelix, Triple-Helix transcription factor family      | (at3g10040): transcription factor                                                                                                   |
| Les.4920.1.S1_at      | BT012902.1 | AT1G47490.1 | TC23329 | III | 0.85  | 1     | 27.3.99 | RNA.regulation of transcription.unclassified                                            | MULTIPLE HITS: (at1g47500,at1g47490). at1g47500: ATRBP47C' (RNA-BINDING PROTEIN 47C'); RNA binding at1g47490: ATRBP47C; RNA binding |
| LesAffx.61034.1.S1_at | BG643132   | AT1G32540.3 | TC21983 | IV  | -1.91 | -0.67 | 27.3.99 | RNA.regulation of transcription.unclassified                                            | (at1g32540): LOL1 (LSD ONE LIKE 1)                                                                                                  |
| LesAffx.4981.1.S1_at  | AW623022   | AT3G54400.1 | TC22429 | VI  | -1.89 | -2.27 | 27.3.99 | RNA.regulation of transcription.unclassified                                            | (at3g54400): aspartyl protease family protein                                                                                       |
| Les.2667.2.S1_at      | AW621251   | AT2G38470.1 | TC22610 | I   | 1.02  | 0.55  | 27.3.32 | RNA.regulation of transcription.WRKY domain transcription factor family                 | (at2g38470): WRKY33 (WRKY DNA-binding protein 33); transcription factor                                                             |
| LesAffx.735.1.S1_at   | AW217158   | AT2G38470.1 | TC22685 | I   | 1.77  | 1.33  | 27.3.32 | RNA.regulation of transcription.WRKY domain transcription factor family                 | (at2g38470): WRKY33 (WRKY DNA-binding protein 33); transcription factor                                                             |
| LesAffx.837.1.S1_at   | AJ831935   | AT3G56400.1 | TC22608 | III | 0.88  | 1.12  | 27.3.32 | RNA.regulation of transcription.WRKY domain transcription factor family                 | (at3g56400): WRKY70 (WRKY DNA-binding protein 70); transcription factor                                                             |
| LesAffx.9910.1.S1_at  | CN385590   | AT1G80840.1 | TC22147 | III | 1.76  | 1.66  | 27.3.32 | RNA.regulation of transcription.WRKY domain transcription factor family                 | (at1g80840): WRKY40 (WRKY DNA-binding protein 40); transcription factor                                                             |
| Les.3962.1.A1_at      | BG630092   | AT2G30590.1 | TC24180 | IV  | -1.05 | -0.65 | 27.3.32 | RNA.regulation of transcription.WRKY domain transcription factor family                 | (at2g30590): WRKY21 (WRKY DNA-binding protein 21); transcription factor                                                             |

|                       |            |             |         |     |       |       |           |                                                                                     |                                                                                                                                   |
|-----------------------|------------|-------------|---------|-----|-------|-------|-----------|-------------------------------------------------------------------------------------|-----------------------------------------------------------------------------------------------------------------------------------|
| LesAffx.57811.1.A1_at | AI488979   | AT4G26640.1 | AI48897 | VI  | -0.9  | -1.13 | 27.3.32   | RNA.regulation of transcription.WRKY domain transcription factor family             | (at4g26640): WRKY20 (WRKY DNA-binding protein 20); transcription factor                                                           |
| LesAffx.35954.1.S1_at | AW092295   | AT3G28920.1 | AW09229 | II  | 0.47  | 1.07  | 27.3.80   | RNA.regulation of transcription.zf-HD                                               | (at3g28920): ATHB34 (ARABIDOPSIS THALIANA HOMEBOX PROTEIN 34); DNA binding / transcription factor                                 |
| Les.928.1.S1_at       | BG735170   | AT2G37220.1 | TC22279 | IV  | -1.08 | 0.23  | 27.4      | RNA.RNA binding                                                                     | (at2g37220): 29 kDa ribonucleoprotein, chloroplast, putative / RNA-binding protein cp29, putative                                 |
| LesAffx.66331.1.S1_at | BI421673   | AT5G24120.1 | TC21932 | V   | -0.32 | -1.61 | 27.2      | RNA.transcription                                                                   | (at5g24120): SIGE (RNA polymerase sigma subunit E); DNA binding / DNA-directed RNA polymerase/ sigma factor/ transcription factor |
| Les.61.1.S1_at        | Y10403.1   | AT1G14790.1 | TC22152 | VI  | -1.12 | -1.14 | 27.2      | RNA.transcription                                                                   | (at1g14790): RDR1 (RNA-DEPENDENT RNA POLYMERASE 1); RNA-directed RNA polymerase/ nucleic acid binding                             |
| Les.4885.1.S1_at      | BT012835.1 | AT2G39980.1 | TC24138 | I   | 3.53  | 2.69  | 16.8.1    | secondary metabolism.flavonoids.anthocyanins                                        | (at2g39980): transferase family protein                                                                                           |
| LesAffx.70136.2.S1_at | AI899680   | AT4G09500.1 | TC23538 | V   | -1.15 | -2.26 | 16.8.1    | secondary metabolism.flavonoids.anthocyanins                                        | (at4g09500): glycosyltransferase family protein                                                                                   |
| LesAffx.61149.1.S1_at | BE460847   | AT5G49690.1 | TC24084 | III | 1.48  | 1.94  | 16.8.1.12 | secondary metabolism.flavonoids.anthocyanins.anthocyanidin 3-O-glucosyltransferase  | (at5g49690): UDP-glucuronosyl/UDP-glucosyl transferase family protein                                                             |
| Les.1205.1.A1_at      | BG630057   | AT3G29590.1 | TC21911 | VI  | -1.83 | -2.04 | 16.8.1.21 | secondary metabolism.flavonoids.anthocyanins.anthocyanin 5-aromatic acyltransferase | (at3g29590): AT5MAT; O-malonyltransferase/ transferase                                                                            |
| LesAffx.68320.1.S1_at | BM535633   | AT5G05270.2 | ES89343 | V   | -0.17 | -1.19 | 16.8.2    | secondary metabolism.flavonoids.chalcones                                           | (at5g05270): chalcone-flavanone isomerase family protein                                                                          |
| LesAffx.56389.1.S1_at | AW034707   | AT1G59960.1 | TC23934 | III | 3     | 3.16  | 16.8.2    | secondary metabolism.flavonoids.chalcones                                           | (at1g59960): aldo/keto reductase, putative                                                                                        |
| Les.3649.1.S1_at      | AJ785484   | AT5G13930.1 | TC23379 | V   | -0.78 | -2.31 | 16.8.2.1  | secondary metabolism.flavonoids.chalcones.naringenin-chalcone synthase              | (at5g13930): CHS (CHALCONE SYNTHASE); naringenin-chalcone synthase                                                                |

|                       |            |             |         |    |       |       |           |                                                                      |                                                                                                                                                                                                                                         |
|-----------------------|------------|-------------|---------|----|-------|-------|-----------|----------------------------------------------------------------------|-----------------------------------------------------------------------------------------------------------------------------------------------------------------------------------------------------------------------------------------|
| Les.5864.1.S1_at      | U20596.1   | AT4G10490.1 | TC23921 | VI | -1.07 | -1.63 | 16.8.3    | secondary metabolism.flavonoids.dihydroflavonols                     | (at4g10490): oxidoreductase, 2OG-Fe(II) oxygenase family protein                                                                                                                                                                        |
| Les.842.1.S1_at       | BI931450   | AT1G01420.1 | TC23080 | VI | -1.13 | -1.63 | 16.8.3    | secondary metabolism.flavonoids.dihydroflavonols                     | (at1g01420): UDP-glucuronosyl/UDP-glucosyl transferase family protein                                                                                                                                                                   |
| LesAffx.29801.1.A1_at | AI489456   | AT5G24530.1 | TC23187 | V  | 0.24  | -1.17 | 16.8.3    | secondary metabolism.flavonoids.dihydroflavonols                     | (at5g24530): oxidoreductase, 2OG-Fe(II) oxygenase family protein                                                                                                                                                                        |
| Les.5601.1.S1_at      | BT014233.1 | AT1G17020.1 | TC22079 | VI | -1.12 | -1.59 | 16.8.4    | secondary metabolism.flavonoids.flavonols                            | (at1g17020): SRG1 (SENESCENCE-RELATED GENE 1); oxidoreductase, acting on paired donors, with incorporation or reduction of molecular oxygen, 2-oxoglutarate as one donor, and incorporation of one atom each of oxygen into both donors |
| Les.3085.1.S1_at      | BM413323   | AT5G08640.1 | TC22204 | V  | -0.54 | -1.95 | 16.8.4    | secondary metabolism.flavonoids.flavonols                            | (at5g08640): FLS (FLAVONOL SYNTHASE)                                                                                                                                                                                                    |
| Les.3545.1.S1_at      | Y14809.1   | AT4G25700.1 | TC22310 | I  | 1.14  | 0.16  | 16.1.4    | secondary metabolism.isoprenoids.carotenoids                         | (at4g25700): BETA-OHASE 1 (BETA-HYDROXYLASE 1); beta-carotene hydroxylase                                                                                                                                                               |
| Les.3544.1.S1_at      | AW930004   | AT5G52570.1 | TC21734 | V  | 0.02  | -1.19 | 16.1.4    | secondary metabolism.isoprenoids.carotenoids                         | (at5g52570): BETA-OHASE 2 (BETA-CAROTENE HYDROXYLASE 2); beta-carotene hydroxylase                                                                                                                                                      |
| Les.3644.1.S1_at      | X86452.1   | AT3G10230.1 | TC23849 | V  | -0.68 | -1.23 | 16.1.4.5  | secondary metabolism.isoprenoids.carotenoids                         | (at3g10230): LYC (LYCOPENE CYCLASE); lycopene beta cyclase                                                                                                                                                                              |
| Les.3771.1.S1_at      | Y14387.1   | AT5G57030.1 | TC22876 | IV | -1.28 | -0.68 | 16.1.4.4  | secondary metabolism.isoprenoids.carotenoids                         | (at5g57030): LUT2 (LUTEIN DEFICIENT 2); lycopene epsilon cyclase                                                                                                                                                                        |
| Les.3958.1.A1_at      | AF385366.1 | AT1G08550.2 | TC23696 | VI | -0.98 | -1.11 | 16.1.4.21 | secondary metabolism.isoprenoids.carotenoids                         | (at1g08550): NPQ1 (NON-PHOTOCHEMICAL QUENCHING 1)                                                                                                                                                                                       |
| Les.4735.1.S1_at      | BT013429.1 | AT4G11820.2 | TC21799 | I  | 0.99  | 0.46  | 16.1.2.2  | secondary metabolism.isoprenoids.mevalonate pathway.HMG-CoA synthase | (at4g11820): BAP1 (hydroxymethylglutaryl-CoA synthase)                                                                                                                                                                                  |

|                       |            |             |         |    |       |       |           |                                                                |                                                                                      |
|-----------------------|------------|-------------|---------|----|-------|-------|-----------|----------------------------------------------------------------|--------------------------------------------------------------------------------------|
| Les.3123.1.S1_at      | BT013406.1 | AT1G74470.1 | TC23016 | VI | -1.59 | -1.48 | 16.1.1    | secondary metabolism.isoprenoids.non-mevalonate pathway        | (at1g74470): geranylgeranyl reductase                                                |
| Les.6.1.S1_at         | AF261141.1 | AT3G57030.1 | TC22389 | VI | -1.54 | -1.54 | 16.4.1    | secondary metabolism.N misc.alkaloid-like                      | (at3g57030): strictosidine synthase family protein                                   |
| LesAffx.60369.1.S1_at | BG130091   | AT3G23490.1 | TC22835 | II | 0.46  | 1.16  | 16.4.3.1  | secondary metabolism.N misc.cyanogenic glycosides              | (at3g23490): CYN (CYANASE); cyanate hydratase                                        |
| LesAffx.66478.1.S1_at | AI773775   | AT1G77670.1 | TC22999 | I  | 0.95  | 0.46  | 16.2      | secondary metabolism.phenylpropanoids                          | (at1g77670): aminotransferase class I and II family protein                          |
| LesAffx.12150.1.A1_at | BG643920   | AT2G23910.1 | TC24476 | V  | 0.21  | -1.11 | 16.2      | secondary metabolism.phenylpropanoids                          | (at2g23910): cinnamoyl-CoA reductase-related                                         |
| Les.5848.1.A1_at      | BG631837   | AT1G65060.1 | TC23527 | I  | 1.22  | 0.74  | 16.2.1.3  | secondary metabolism.phenylpropanoids.lignin biosynthesis.4CL  | (at1g65060): 4CL3 (4-coumarate:CoA ligase 3); 4-coumarate-CoA ligase                 |
| Les.2988.1.S1_at      | CK715255   | AT2G30490.1 | TC22567 | I  | 1.09  | -0.3  | 16.2.1.2  | secondary metabolism.phenylpropanoids.lignin biosynthesis.C4H  | (at2g30490): ATC4H (CINNAMATE-4-HYDROXYLASE)                                         |
| LesAffx.37563.1.S1_at | Z70216.1   | AT2G30490.1 | TC23549 | I  | 1.41  | 0.8   | 16.2.1.2  | secondary metabolism.phenylpropanoids.lignin biosynthesis.C4H  | (at2g30490): ATC4H (CINNAMATE-4-HYDROXYLASE)                                         |
| Les.2934.2.S1_at      | BG128445   | AT4G39330.2 | TC22376 | V  | -0.49 | -2    | 16.2.1.10 | secondary metabolism.phenylpropanoids.lignin biosynthesis.CAD  | (at4g39330): mannitol dehydrogenase, putative                                        |
| Les.3741.1.A1_at      | AF146691.1 | AT4G37990.1 | TC23195 | V  | 0.05  | -2.34 | 16.2.1.10 | secondary metabolism.phenylpropanoids.lignin biosynthesis.CAD  | (at4g37990): ELI3-2 (ELICITOR-ACTIVATED GENE 3)                                      |
| Les.206.1.S1_at       | AW625821   | AT4G34230.2 | TC23716 | IV | -1.28 | 0.42  | 16.2.1.10 | secondary metabolism.phenylpropanoids.lignin biosynthesis.CAD  | (at4g34230): CAD5 (CINNAMYL ALCOHOL DEHYDROGENASE 5); cinnamyl-alcohol dehydrogenase |
| LesAffx.34276.1.S1_at | BE433400   | AT5G14700.1 | TC22379 | V  | -1.15 | -1.94 | 16.2.1.7  | secondary metabolism.phenylpropanoids.lignin biosynthesis.CCR1 | (at5g14700): cinnamoyl-CoA reductase-related                                         |
| LesAffx.34986.1.A1_at | CK715664   | AT5G54160.1 | TC23304 | V  | -0.56 | -1.46 | 16.2.1.9  | secondary metabolism.phenylpropanoids.lignin biosynthesis.COMT | (at5g54160): ATOMT1 (O-METHYLTRANSFERASE 1)                                          |

|                       |            |             |         |     |       |       |      |                          |                                                                                                               |
|-----------------------|------------|-------------|---------|-----|-------|-------|------|--------------------------|---------------------------------------------------------------------------------------------------------------|
| LesAffx.60722.1.S1_at | AW092522   | AT3G51970.1 | TC22954 | I   | 1.24  | 0.9   | 16.7 | secondary metabolism.wax | (at3g51970): long-chain-alcohol O-fatty-acyltransferase family protein / wax synthase family protein          |
| Les.971.1.A1_at       | CK575003   | AT1G68530.1 | TC22472 | V   | -0.01 | -1.54 | 16.7 | secondary metabolism.wax | (at1g68530): CUT1 (CUTICULAR 1); acyltransferase                                                              |
| LesAffx.55337.1.S1_at | BM410261   | AT1G25450.1 | TC22580 | V   | -0.15 | -1.52 | 16.7 | secondary metabolism.wax | (at1g25450): very-long-chain fatty acid condensing enzyme, putative                                           |
| LesAffx.15921.1.S1_at | BM412286   | AT3G49050.1 | TC23758 | I   | 1.64  | 1.3   | 30.3 | signalling.calcium       | (at3g49050): lipase class 3 family protein / calmodulin-binding heat-shock protein, putative                  |
| Les.1977.1.S1_at      | BG630657   | AT2G45670.1 | TC22750 | VI  | -1.1  | -1.37 | 30.3 | signalling.calcium       | (at2g45670): calcineurin B subunit-related                                                                    |
| Les.1997.1.S1_at      | BE354113   | AT1G08450.1 | TC22008 | VI  | -1.03 | -1.2  | 30.3 | signalling.calcium       | (at1g08450): CRT3 (CALRETICULIN 3); calcium ion binding                                                       |
| Les.5318.1.S1_at      | BT013703.1 | AT3G52870.1 | TC24128 | VI  | -1.14 | -1.89 | 30.3 | signalling.calcium       | (at3g52870): calmodulin-binding family protein                                                                |
| LesAffx.56.3.S1_at    | BG132247   | AT3G21180.1 | TC23902 | V   | -0.42 | -1.34 | 30.3 | signalling.calcium       | (at3g21180): ACA9 (autoinhibited Ca <sup>2+</sup> -ATPase 9); calcium-transporting ATPase/ calmodulin binding |
| LesAffx.61165.1.S1_at | BM409862   | AT5G62570.1 | TC22968 | V   | -0.59 | -1.05 | 30.3 | signalling.calcium       | (at5g62570): calmodulin-binding protein                                                                       |
| LesAffx.9367.1.S1_at  | CN385420   | AT5G49480.1 | TC22317 | V   | -0.17 | -1.08 | 30.3 | signalling.calcium       | (at5g49480): ATCP1 (CA <sup>2+</sup> -BINDING PROTEIN 1); calcium ion binding                                 |
| Les.5939.1.S1_at      | CN385618   | AT4G27280.1 | TC23300 | III | 0.7   | 1.17  | 30.3 | signalling.calcium       | (at4g27280): calcium-binding EF hand family protein                                                           |
| Les.934.1.S1_at       | BG628248   | AT1G18210.2 | GO37331 | III | 2.24  | 1.94  | 30.3 | signalling.calcium       | (at1g18210): calcium-binding protein, putative                                                                |
| LesAffx.11542.1.S1_at | BI922302   | AT3G50770.1 | TC21973 | III | 1.63  | 1.72  | 30.3 | signalling.calcium       | (at3g50770): calmodulin-related protein, putative                                                             |
| LesAffx.47666.1.S1_at | BE458190   | AT4G34150.1 | TC22130 | III | 0.71  | 1.06  | 30.3 | signalling.calcium       | (at4g34150): C2 domain-containing protein                                                                     |
| LesAffx.57454.1.S1_at | BI923132   | AT1G18530.1 | TC22139 | III | 1.02  | 2.02  | 30.3 | signalling.calcium       | (at1g18530): calmodulin, putative                                                                             |
| Les.4861.1.A1_at      | BT012784.1 | AT1G07410.1 | TC23346 | I   | 0.97  | 0.62  | 30.5 | signalling.G-proteins    | (at1g07410): AtRABA2b (Arabidopsis Rab GTPase homolog A2b); GTP binding                                       |
| LesAffx.64861.1.S1_at | BG127249   | AT2G31680.1 | TC22312 | I   | 1.01  | 0.8   | 30.5 | signalling.G-proteins    | (at2g31680): AtRABA5d (Arabidopsis Rab GTPase homolog A5d); GTP binding                                       |
| Les.4873.1.S1_at      | BT012806.1 | AT2G43130.1 | TC23935 | II  | 0.33  | 1.53  | 30.5 | signalling.G-proteins    | (at2g43130): ARA4 (Arabidopsis Rab GTPase homolog A5c); GTP binding                                           |
| Les.3564.1.A1_at      | X55684.1   | AT5G08650.1 | TC24079 | V   | -0.62 | -1.1  | 30.5 | signalling.G-proteins    | (at5g08650): GTP-binding protein LepA, putative                                                               |
| Les.176.1.S1_at       | U38464.1   | AT4G17530.1 | TC21796 | III | 1.01  | 0.89  | 30.5 | signalling.G-proteins    | (at4g17530): RAB1C; GTP binding                                                                               |
| Les.3623.1.S1_at      | L12051.1   | AT3G62560.1 | TC22145 | III | 0.64  | 1.21  | 30.5 | signalling.G-proteins    | (at3g62560): GTP-binding protein, putative                                                                    |

|                       |            |             |         |     |       |       |         |                                                    |                                                                               |
|-----------------------|------------|-------------|---------|-----|-------|-------|---------|----------------------------------------------------|-------------------------------------------------------------------------------|
| LesAffx.62232.1.S1_at | AW649113   | AT4G08950.1 | TC23914 | III | 1.22  | 1.63  | 30.1.1  | signalling.in sugar and nutrient physiology        | (at4g08950): phosphate-responsive protein, putative (EXO)                     |
| LesAffx.59622.1.S1_at | BI210866   | AT2G40080.1 | TC22863 | II  | 0.31  | 1.66  | 30.11   | signalling.light                                   | (at2g40080): ELF4 (EARLY FLOWERING 4)                                         |
| Les.5791.1.S1_at      | BT014572.1 | AT5G48150.2 | TC22816 | VI  | -1.32 | -1.09 | 30.11   | signalling.light                                   | (at5g48150): PAT1 (PHYTOCHROME A SIGNAL TRANSDUCTION 1); transcription factor |
| Les.327.1.S1_at       | BT014378.1 | AT2G30520.3 | TC22961 | V   | -0.32 | -2.37 | 30.11   | signalling.light                                   | (at2g30520): RPT2 (ROOT PHOTOTROPISM 2); protein binding                      |
| Les.3488.1.S1_at      | AF348461.1 | AT4G08920.1 | TC21724 | V   | -0.85 | -1.41 | 30.11   | signalling.light                                   | (at4g08920): CRY1 (CRYPTOCHROME 1, OUT OF PHASE 2)                            |
| Les.2219.1.A1_at      | BG735134   | AT5G43310.1 | TC23582 | VI  | -0.98 | -1.36 | 30.11.1 | signalling.light.COP9 signalosome                  | (at5g43310): COP1-interacting protein-related                                 |
| Les.5152.1.S1_at      | BT013393.1 | AT4G01370.1 | TC24469 | III | 1.16  | 1.23  | 30.6    | signalling.MAP kinases                             | (at4g01370): ATMPK4 (MAP KINASE 4); MAP kinase/ kinase                        |
| LesAffx.53474.1.S1_at | BG133264   | AT2G15320.1 | TC22918 | VI  | -1.43 | -1.33 | 30.8    | signalling.misc                                    | (at2g15320): leucine-rich repeat family protein                               |
| LesAffx.65678.1.S1_at | AW442323   | AT1G53730.2 | AW22314 | VI  | -1.31 | -1.3  | 30.2.5  | signalling.receptor kinases.leucine rich repeat V  | (at1g53730): leucine-rich repeat transmembrane protein kinase, putative       |
| LesAffx.46815.1.S1_at | BI934723   | AT5G12940.1 | TC21911 | VI  | -1.2  | -0.98 | 30.2.11 | signalling.receptor kinases.leucine rich repeat XI | (at5g12940): leucine-rich repeat family protein                               |
| Les.1951.1.A1_at      | BG630440   | AT3G19320.1 | TC23845 | IV  | -2.07 | -1.32 | 30.2.99 | signalling.receptor kinases.misc                   | (at3g19320): leucine-rich repeat family protein                               |
| Les.3683.1.S1_at      | AY093595.1 | AT4G11650.1 | TC24086 | III | 1.63  | 2.34  | 20.2    | stress.abiotic                                     | (at4g11650): ATOSM34 (OSMOTIN 34)                                             |
| Les.4307.1.S1_at      | AY257487.1 | AT4G11650.1 | TC21819 | III | 2.21  | 2.49  | 20.2    | stress.abiotic                                     | (at4g11650): ATOSM34 (OSMOTIN 34)                                             |
| Les.5915.1.S1_at      | AY344539.1 | AT3G01420.1 | TC22182 | III | 3.93  | 4.42  | 20.2    | stress.abiotic                                     | (at3g01420): ALPHA-DOX1 (ALPHA-DIOXYGENASE 1)                                 |
| LesAffx.62570.2.A1_at | CD003040   | AT4G00750.1 | TC24016 | I   | 1.9   | 1.36  | 20.2.3  | stress.abiotic.drought/salt                        | (at4g00750): dehydration-responsive family protein                            |
| LesAffx.10495.1.S1_at | AW035719   | AT4G16660.1 | TC23875 | I   | 1.04  | 0.81  | 20.2.1  | stress.abiotic.heat                                | (at4g16660): heat shock protein 70, putative / HSP70, putative                |
| LesAffx.68054.1.S1_at | AI898501   | AT1G56300.1 | TC22471 | II  | 0.5   | 1.29  | 20.2.1  | stress.abiotic.heat                                | (at1g56300): DNAJ heat shock N-terminal domain-containing protein             |
| Les.4326.1.S1_at      | AY235681.1 | AT5G03160.1 | TC22243 | III | 0.93  | 1.25  | 20.2.1  | stress.abiotic.heat                                | (at5g03160): DNAJ heat shock N-terminal domain-containing protein             |
| LesAffx.58365.1.S1_at | BM536079   | AT3G08970.1 | TC22511 | III | 1.13  | 1.18  | 20.2.1  | stress.abiotic.heat                                | (at3g08970): DNAJ heat shock N-terminal domain-containing protein             |
| LesAffx.805.1.S1_at   | BI203776   | AT3G62600.1 | TC23079 | III | 1.18  | 1.49  | 20.2.1  | stress.abiotic.heat                                | (at3g62600): DNAJ heat shock family protein                                   |
| LesAffx.49201.1.S1_at | AW222231   | AT5G63860.1 | TC24148 | VI  | -0.74 | -1.15 | 20.2.5  | stress.abiotic.light                               | (at5g63860): UVR8 (UVB-RESISTANCE 8)                                          |



|                       |            |             |         |     |       |       |            |                                                                                |                                                                                                           |
|-----------------------|------------|-------------|---------|-----|-------|-------|------------|--------------------------------------------------------------------------------|-----------------------------------------------------------------------------------------------------------|
| Les.3593.1.S1_at      | BT012763.1 | AT5G66400.1 | TC23407 | V   | -0.13 | -1.61 | 20.2.99    | stress.abiotic.unspecified                                                     | (at5g66400): RAB18 (RESPONSIVE TO ABA 18)                                                                 |
| LesAffx.23349.1.S1_at | AI782014   | AT5G20630.1 | TC21920 | IV  | -2.38 | -0.39 | 20.2.99    | stress.abiotic.unspecified                                                     | (at5g20630): GLP3 (GERMIN-LIKE PROTEIN 3); manganese ion binding / metal ion binding / nutrient reservoir |
| Les.4693.1.S1_at      | M69247.1   | AT1G50060.1 | TC23231 | II  | 0.08  | 1.94  | 20.1       | stress.biotic                                                                  | (at1g50060): pathogenesis-related protein, putative                                                       |
| Les.122.1.S1_at       | Z15141.1   | AT3G12500.1 | TC22826 | III | 0.99  | 1.11  | 20.1       | stress.biotic                                                                  | (at3g12500): ATHCHIB (BASIC CHITINASE); chitinase                                                         |
| Les.2137.1.S1_at      | AY359965.1 | AT2G25470.1 | TC21714 | III | 1.07  | 1.03  | 20.1       | stress.biotic                                                                  | (at2g25470): leucine-rich repeat family protein                                                           |
| Les.3619.1.S1_at      | J04099.1   | AT2G38870.1 | TC23203 | III | 1.42  | 1.82  | 20.1       | stress.biotic                                                                  | (at2g38870): protease inhibitor, putative                                                                 |
| Les.54.1.S1_at        | AW218809   | AT3G19690.1 | TC22203 | III | 1.28  | 2.49  | 20.1       | stress.biotic                                                                  | (at3g19690): pathogenesis-related protein, putative                                                       |
| LesAffx.61012.1.S1_at | BF050668   | AT3G49750.1 | TC23271 | III | 0.88  | 1.21  | 20.1       | stress.biotic                                                                  | (at3g49750): leucine-rich repeat family protein                                                           |
| LesAffx.71065.1.S1_at | BM413117   | AT1G78780.2 | TC22472 | III | 1.77  | 1.89  | 20.1       | stress.biotic                                                                  | (at1g78780): pathogenesis-related family protein                                                          |
| LesAffx.66226.1.S1_at | BI926952   | AT1G18250.1 | TC22735 | IV  | -1.36 | 0.17  | 20.1       | stress.biotic                                                                  | (at1g18250): ATLP-1 (Arabidopsis thaumatin-like protein 1)                                                |
| LesAffx.71532.1.S1_at | AI772343   | AT1G33590.1 | TC22607 | I   | 1.15  | 0.92  | 20.1.7     | stress.biotic.PR-proteins                                                      | (at1g33590): disease resistance protein-related / LRR protein-related                                     |
| Les.5884.1.S1_at      | CK716273   | AT1G17860.1 | TC21763 | III | 1.82  | 2.8   | 20.1.7.6.1 | stress.biotic.PR-proteins.proteinase inhibitors.trypsin inhibitor              | (at1g17860): trypsin and protease inhibitor family protein / Kunitz family protein                        |
| Les.26.1.S1_at        | AF088276.1 | AT1G64060.1 | TC21861 | III | 2.05  | 3.27  | 20.1.1     | stress.biotic.respiratory burst                                                | (at1g64060): ATRBOH F (RESPIRATORY BURST OXIDASE PROTEIN F); NAD(P)H oxidase                              |
| Les.2817.1.S1_at      | BF050945   | AT1G10670.2 | TC24089 | I   | 1.1   | 0.75  | 8.2.11     | TCA / org. transformation.other organic acid transformaitons.atp-citrate lyase | (at1g10670): ACLA-1 (ATP-citrate lyase A-1)                                                               |
| Les.5831.1.S1_at      | BT013888.1 | AT5G58330.2 | TC21723 | V   | -0.72 | -1.36 | 8.2.9      | TCA / org. transformation.other organic acid transformaitons.cyt MDH           | (at5g58330): malate dehydrogenase (NADP), chloroplast, putative                                           |
| LesAffx.21904.1.S1_at | BM536146   | AT1G44446.2 | TC23302 | V   | -0.75 | -1.67 | 19.16      | tetrapyrrole synthesis.chlorophyll b synthase                                  | (at1g44446): CH1 (CHLORINA 1); chlorophyll a oxygenase                                                    |
| Les.3322.1.S1_at      | BI935557   | AT5G13630.2 | TC22083 | V   | -1.8  | -3.14 | 19.1       | tetrapyrrole synthesis.magnesium chelatase                                     | (at5g13630): GUN5 (GENOMES UNCOUPLED 5)                                                                   |

|                       |            |             |         |     |       |       |         |                                                                                         |                                                                                                                             |
|-----------------------|------------|-------------|---------|-----|-------|-------|---------|-----------------------------------------------------------------------------------------|-----------------------------------------------------------------------------------------------------------------------------|
| Les.2924.1.S1_at      | BT012789.1 | AT4G18480.1 | TC23389 | IV  | -1.09 | -0.59 | 19.1    | tetrapyrrole synthesis.magnesium chelataase                                             | (at4g18480): CHLI1 (CHLORINA 42); magnesium chelataase                                                                      |
| Les.3175.1.S1_at      | BG626608   | AT3G56940.1 | TC23958 | VI  | -1.12 | -1.29 | 19.12   | tetrapyrrole synthesis.magnesium-protoporphyrin IX monomethyl ester (oxidative) cyclase | (at3g56940): AT103 (DICARBOXYLATE DIIRON 1)                                                                                 |
| Les.5120.1.S1_at      | BT013322.1 | AT4G27440.2 | TC21818 | VI  | -1.48 | -1.57 | 19.14   | tetrapyrrole synthesis.protochlorophyllide reductase                                    | (at4g27440): PORB (PROTOCHLOROPHYLLIDE OXIDOREDUCTASE B); oxidoreductase/ protochlorophyllide reductase                     |
| Les.3011.1.S1_at      | BT012732.1 | AT1G03630.1 | TC23275 | IV  | -1.24 | -0.79 | 19.14   | tetrapyrrole synthesis.protochlorophyllide reductase                                    | (at1g03630): POR C (PROTOCHLOROPHYLLIDE OXIDOREDUCTASE); NADPH dehydrogenase/ oxidoreductase/ protochlorophyllide reductase |
| Les.5850.1.S1_at      | BT014189.1 | AT4G27440.2 | TC21894 | IV  | -1.93 | -1.1  | 19.14   | tetrapyrrole synthesis.protochlorophyllide reductase                                    | (at4g27440): PORB (PROTOCHLOROPHYLLIDE OXIDOREDUCTASE B); oxidoreductase/ protochlorophyllide reductase                     |
| LesAffx.41330.1.A1_at | CK574967   | AT3G59400.1 | TC24064 | IV  | -1.8  | -1.19 | 19.4    | tetrapyrrole synthesis.regulation                                                       | (at3g59400): GUN4 (Genomes uncoupled 4)                                                                                     |
| Les.5221.1.S1_at      | BT013523.1 | AT5G43860.1 | TC24473 | IV  | -1.23 | -0.36 | 19.99   | tetrapyrrole synthesis.unspecified                                                      | (at5g43860): ATCLH2 (Chlorophyll-chlorophyllido hydrolase 2)                                                                |
| Les.797.1.S1_at       | X92854.1   | AT4G13510.1 | TC24488 | III | 1     | 1.3   | 34.5    | transport.ammonium                                                                      | MULTIPLE HITS: (at4g13510,at4g13505). at4g13510: AMT1;1 (AMMONIUM TRANSPORT 1); ammonium transporter at4g13505: other RNA   |
| Les.34.1.S1_at        | AF050496.1 | AT4G00900.1 | TC21713 | VI  | -1.06 | -1.4  | 34.21   | transport.calcium                                                                       | (at4g00900): ECA2 ("calcium-transporting ATPase 2, endoplasmic reticulum-type"); calcium-transporting ATPase                |
| LesAffx.23546.1.S1_at | BG126449   | AT3G51860.1 | TC22663 | V   | -0.69 | -1.29 | 34.21   | transport.calcium                                                                       | (at3g51860): CAX3 (cation exchanger 3); cation:cation antiporter                                                            |
| LesAffx.16710.2.A1_at | AI899221   | AT1G80760.1 | TC23788 | V   | -0.16 | -1.04 | 34.19.3 | transport.Major Intrinsic Proteins.NIP                                                  | (at1g80760): NIP6;1 (NOD26-like intrinsic protein 6;1); water channel                                                       |
| Les.5610.1.S1_at      | BT014251.1 | AT1G01620.2 | TC22162 | IV  | -1.25 | -0.22 | 34.19.1 | transport.Major Intrinsic Proteins.PIP                                                  | (at1g01620): PIP1C (PLASMA MEMBRANE INTRINSIC PROTEIN 1;3); water channel                                                   |
| Les.5960.1.S1_at      | AY731066.1 | AT4G17340.1 | TC22652 | II  | 0.39  | 1.9   | 34.19.2 | transport.Major Intrinsic Proteins.TIP                                                  | (at4g17340): DELTA-TIP2/TIP2;2 (tonoplast intrinsic protein 2;2); water channel                                             |

|                       |            |             |         |     |       |       |         |                                                                 |                                                                                                                                                                  |
|-----------------------|------------|-------------|---------|-----|-------|-------|---------|-----------------------------------------------------------------|------------------------------------------------------------------------------------------------------------------------------------------------------------------|
| Les.4953.1.S1_at      | BT012976.1 | AT4G01470.1 | TC23170 | VI  | -1.05 | -1.65 | 34.19.2 | transport.Major Intrinsic Proteins.TIP                          | (at4g01470): GAMMA-TIP3/TIP1;3 (tonoplast intrinsic protein 1;3); water channel                                                                                  |
| LesAffx.286.2.S1_a_at | BG629460   | AT2G36830.1 | BP89354 | VI  | -1.08 | -1.07 | 34.19.2 | transport.Major Intrinsic Proteins.TIP                          | (at2g36830): GAMMA-TIP (Tonoplast intrinsic protein (TIP) gamma); water channel                                                                                  |
| LesAffx.52329.1.S1_at | BI927716   | AT5G17520.1 | BI92771 | VI  | -1.17 | -1.25 | 34.8    | transport.metabolite transporters at the envelope membrane      | (at5g17520): RCP1 (ROOT CAP 1)                                                                                                                                   |
| Les.4912.1.S1_at      | BT012886.1 | AT3G05290.1 | TC22592 | III | 0.99  | 0.84  | 34.9    | transport.metabolite transporters at the mitochondrial membrane | (at3g05290): mitochondrial substrate carrier family protein                                                                                                      |
| LesAffx.59668.1.S1_at | BI208638   | AT5G46800.1 | TC24026 | III | 1.97  | 1.79  | 34.9    | transport.metabolite transporters at the mitochondrial membrane | (at5g46800): BOU (A BOUT DE SOUFFLE); binding                                                                                                                    |
| LesAffx.62906.1.S1_at | BI923447   | AT1G79900.1 | TC23590 | III | 0.65  | 1.29  | 34.9    | transport.metabolite transporters at the mitochondrial membrane | (at1g79900): ATMBAC2/BAC2 (Arabidopsis mitochondrial basic amino acid carrier 2); L-ornithine transporter/ binding / carnitine:acyl carnitine antiporter         |
| LesAffx.67116.1.S1_at | BM413085   | AT5G46800.1 | TC21926 | III | 2.03  | 1.96  | 34.9    | transport.metabolite transporters at the mitochondrial membrane | (at5g46800): BOU (A BOUT DE SOUFFLE); binding                                                                                                                    |
| Les.4844.1.S1_at      | BI921923   | AT5G24380.1 | TC23893 | V   | -0.8  | -1.52 | 34.12   | transport.metal                                                 | (at5g24380): YSL2 (YELLOW STRIPE LIKE 2); oligopeptide transporter                                                                                               |
| Les.5530.1.S1_at      | BT014086.1 | AT5G03380.1 | TC23075 | III | 2.12  | 1.82  | 34.12   | transport.metal                                                 | (at5g03380): heavy-metal-associated domain-containing protein                                                                                                    |
| LesAffx.41518.1.S1_at | AW930080   | AT1G31260.1 | TC23094 | IV  | -1.62 | -0.92 | 34.12   | transport.metal                                                 | (at1g31260): ZIP10 (ZINC TRANSPORTER 10 PRECURSOR); cation transporter                                                                                           |
| LesAffx.14321.1.S1_at | AW737808   | AT5G49130.1 | AW73780 | VI  | -1.48 | -1.78 | 34.99   | transport.misc                                                  | (at5g49130): MATE efflux family protein                                                                                                                          |
| LesAffx.3570.4.S1_at  | AW624180   | AT1G72160.1 | TC22612 | VI  | -1.16 | -0.82 | 34.99   | transport.misc                                                  | (at1g72160): SEC14 cytosolic factor family protein / phosphoglyceride transfer family protein                                                                    |
| LesAffx.64583.1.S1_at | BM409701   | AT1G15170.1 | TC22829 | V   | -0.19 | -1.16 | 34.99   | transport.misc                                                  | (at1g15170): MATE efflux family protein                                                                                                                          |
| LesAffx.68945.1.S1_at | BM413364   | AT5G13750.1 | TC23656 | V   | -0.12 | -1.34 | 34.99   | transport.misc                                                  | (at5g13750): ZIFL1 (ZINC INDUCED FACILITATOR-LIKE 1); tetracycline:hydrogen antiporter/ transporter                                                              |
| Les.4738.1.S1_at      | BT013480.1 | AT5G62890.3 | GO37558 | IV  | -1.66 | -0.74 | 34.99   | transport.misc                                                  | (at5g62890): permease, putative                                                                                                                                  |
| LesAffx.69264.1.S1_at | BF113833   | AT5G50200.1 | TC23903 | IV  | -1.54 | -0.44 | 34.4    | transport.nitrate                                               | (at5g50200): WR3 (WOUND-RESPONSIVE 3)                                                                                                                            |
| Les.5670.1.S1_at      | BT014359.1 | AT4G18210.1 | TC22878 | IV  | -1.34 | -0.28 | 34.1    | transport.nucleotides                                           | MULTIPLE HITS: (at4g18220,at4g18210). at4g18220: purine permease family protein at4g18210: ATPUP10 (Arabidopsis thaliana purine permease 10); purine transporter |

|                       |            |             |         |     |       |       |       |                                      |                                                                                                                                                               |
|-----------------------|------------|-------------|---------|-----|-------|-------|-------|--------------------------------------|---------------------------------------------------------------------------------------------------------------------------------------------------------------|
| LesAffx.10279.1.A1_at | CK720579   | AT1G28220.1 | TC23575 | IV  | -1.66 | -1.01 | 34.1  | transport.nucleotides                | (at1g28220): ATPUP3 (Arabidopsis thaliana purine permease 3); purine transporter                                                                              |
| Les.3671.1.S1_at      | M60166.1   | AT5G62670.1 | TC23533 | VI  | -0.92 | -1.11 | 34.1  | transport.p- and v-ATPases           | (at5g62670): AHA11 (ARABIDOPSIS H(+)-ATPASE 11); ATPase                                                                                                       |
| Les.3372.1.S1_at      | BG631141   | AT1G52190.1 | TC23249 | VI  | -2.29 | -2.24 | 34.13 | transport.peptides and oligopeptides | (at1g52190): proton-dependent oligopeptide transport (POT) family protein                                                                                     |
| Les.5282.1.S1_at      | BT013633.1 | AT1G52190.1 | BE46052 | VI  | -1.14 | -0.83 | 34.13 | transport.peptides and oligopeptides | (at1g52190): proton-dependent oligopeptide transport (POT) family protein                                                                                     |
| LesAffx.12670.3.S1_at | BF113197   | AT2G38060.1 | TC22012 | I   | 1.11  | 0.29  | 34.7  | transport.phosphate                  | (at2g38060): transporter-related                                                                                                                              |
| Les.2044.2.S1_at      | AW443278   | AT4G22200.1 | TC23957 | VI  | -1.15 | -1.12 | 34.15 | transport.potassium                  | (at4g22200): AKT2 (Arabidopsis K <sup>+</sup> transporter 2); cyclic nucleotide binding / inward rectifier potassium channel                                  |
| LesAffx.52960.1.S1_at | BI207845   | AT2G24240.1 | TC23617 | III | 0.69  | 1.08  | 34.15 | transport.potassium                  | (at2g24240): potassium channel tetramerisation domain-containing protein                                                                                      |
| Les.3479.1.S1_at      | AF347614.1 | AT1G22150.1 | TC22134 | VI  | -1.06 | -1.19 | 34.6  | transport.sulphate                   | (at1g22150): SULTR1;3 (sulfate transporter); sulfate transporter                                                                                              |
| Les.3774.1.S1_at      | AJ010942.1 | AT5G26340.1 | TC23863 | I   | 1.38  | 0.57  | 34.2  | transporter.sugars                   | (at5g26340): MSS1 (SUGAR TRANSPORT PROTEIN 13); carbohydrate transporter/ hexose:hydrogen symporter/ high-affinity hydrogen:glucose transporter/ sugar porter |
| Les.1784.1.S1_at      | BI931777   | AT3G05400.1 | TC24140 | VI  | -1.44 | -1.97 | 34.2  | transporter.sugars                   | (at3g05400): sugar transporter, putative                                                                                                                      |
| LesAffx.51641.1.S1_at | BM535284   | AT1G75220.1 | TC23056 | VI  | -1.16 | -0.95 | 34.2  | transporter.sugars                   | (at1g75220): integral membrane protein, putative                                                                                                              |
