# Supplementary material for: Transcriptome Analysis of Tomato Flower Pedicel Tissues Reveals Abscission Zone-Specific Modulation of Key Meristem Activity Genes
Source: PubMed Central journal article supplement (PMC3563536; doi:10.1371/journal.pone.0055238), 2013-02-04
Supplement: pone.0055238.s009.pdf [file pone.0055238.s009.pdf]

**Table S7.** The full list of AZ-preferentially expressed genes.

| Affy_Probe Set ID        | GenBank accession | Tomato Gene Index | Ratio |       | Raw reading |         |         | Annotation                                                            |
|--------------------------|-------------------|-------------------|-------|-------|-------------|---------|---------|-----------------------------------------------------------------------|
|                          |                   |                   | AZ:AP | AZ:BP | AP          | AZ      | BP      |                                                                       |
| <i>Up regulated (68)</i> |                   |                   |       |       |             |         |         |                                                                       |
| LesAffx.39.1.S1_at       | CN385433          | TC22335           | 108.7 | 11.37 | 4.21        | 457.63  | 40.26   | anionic peroxidase swpb2 [Ipomoea batatas]                            |
| Les.3646.1.S1_at         | U70481.1          | TC21735           | 68.41 | 5.1   | 14.13       | 966.66  | 189.61  | polygalacturonase 4 [Lycopersicon esculentum]                         |
| Les.3693.1.S1_at         | AF426174.1        | TC22813           | 24.79 | 9.73  | 14.86       | 368.41  | 37.88   | blind [Lycopersicon esculentum]                                       |
| Les.3668.1.S1_at         | U09026.1          | TC21838           | 22.81 | 2.1   | 88.51       | 2019.17 | 963.19  | lipoxigenase                                                          |
| LesAffx.31873.1.S1_at    | BI928574          | BI92857           | 22.63 | 4.53  | 21.54       | 487.5   | 107.55  | unnamed protein product [Vitis vinifera]                              |
| Les.4938.1.S1_at         | BT012940.1        | TC22310           | 16.83 | 3.59  | 134         | 2255.02 | 627.99  | unnamed protein product [Vitis vinifera]                              |
| Les.4136.1.S1_at         | AJ538329.1        | NP59756           | 16.62 | 15.32 | 61.15       | 1016.33 | 66.33   | wuschel protein [Solanum lycopersicum]                                |
| Les.1175.2.S1_at         | AI777697          | FS18013           | 13.73 | 4.42  | 283.75      | 3897.03 | 881.16  | PAR-1c [Nicotiana tabacum]                                            |
| Les.3571.1.S1_at         | U76408.1          | NP00012           | 10.86 | 2.05  | 51.39       | 558.11  | 271.83  | knotted 2 protein [Lycopersicon esculentum]                           |
| LesAffx.61901.1.S1_at    | AW931428          | AW93142           | 10.78 | 8.73  | 60.14       | 648.16  | 74.28   | unnamed protein product [Vitis vinifera]                              |
| Les.4309.1.S1_at         | AF375967.1        | NP80337           | 10.61 | 4.29  | 30.54       | 323.88  | 75.47   | bell-like homeodomain protein 4 [Lycopersicon esculentum]             |
| Les.796.1.A1_at          | BG627506          | TC22633           | 10.56 | 2.27  | 145.36      | 1534.32 | 675.27  | unknown                                                               |
| LesAffx.24134.1.A1_at    | CK720539          | CK72053           | 8.7   | 4.82  | 25.41       | 221.11  | 45.89   | unnamed protein product [Vitis vinifera]                              |
| Les.2922.1.S1_at         | BI924348          | TC22195           | 8.6   | 5.55  | 241.84      | 2080.01 | 374.87  | cytochrome P450 [Petunia x hybrida]                                   |
| Les.69.1.S1_at           | AF098674.1        | TC21732           | 8     | 7.73  | 16.97       | 135.83  | 17.58   | lateral suppressor protein [Lycopersicon esculentum]                  |
| Les.4976.1.S1_at         | BT013033.1        | TC22335           | 7.67  | 5.93  | 35.65       | 273.27  | 46.12   | anionic peroxidase swpb2 [Ipomoea batatas]                            |
| LesAffx.66953.1.S1_at    | AW651552          | TC23604           | 6.8   | 2.31  | 508.24      | 3457.16 | 1494.43 | unnamed protein product [Vitis vinifera]                              |
| LesAffx.66974.1.S1_at    | BG135595          | TC23429           | 6.26  | 3.7   | 16.87       | 105.59  | 28.51   | hypothetical protein [Vitis vinifera]                                 |
| Les.3645.1.S1_at         | U54770.1          | NP924378          | 5.39  | 3.89  | 668.12      | 3600.55 | 926.32  | cytochrome P450 homolog [Lycopersicon esculentum]                     |
| Les.3625.1.S1_at         | L22188.1          | TC23715           | 5.06  | 2.12  | 121.3       | 613.25  | 288.8   | RSI-1 protein                                                         |
| Les.3818.1.S1_at         | AF502085.1        | TC21752           | 4.92  | 2.14  | 38.97       | 191.84  | 89.52   | ethylene responsive element binding protein [Lycopersicon esculentum] |
| Les.2278.1.S1_at         | BT014352.1        | TC24112           | 4.73  | 2.18  | 1119.56     | 5293.55 | 2433.11 | flavanone 3 beta-hydroxylase [Solanum tuberosum]                      |
| LesAffx.63739.1.S1_at    | AW033134          | TC21965           | 4.72  | 2.93  | 104.08      | 491.15  | 167.45  | hypothetical protein [Vitis vinifera]                                 |
| LesAffx.39043.1.S1_at    | AW032318          | TC22833           | 4.5   | 2.25  | 53.57       | 240.95  | 106.94  | hypothetical protein [Vitis vinifera]                                 |
| Les.113.1.S1_at          | CN384955          | TC23130           | 4.44  | 2.1   | 443.47      | 1970.43 | 940.21  | hypothetical protein MtrDRAFT_AC148340g20v2 [Medicago truncatula]     |
| Les.4443.1.A1_s_at       | BG630528          | TC21730           | 4.39  | 3.23  | 927.52      | 4070.88 | 1260.97 | cytochrome P450 homolog [Lycopersicon esculentum]                     |
| Les.3819.1.S1_at         | AY140893.1        | TC21842           | 4.3   | 3.34  | 260.44      | 1120.65 | 335.53  | ovate protein [Lycopersicon esculentum]                               |
| LesAffx.59569.1.S1_at    | BI203707          | TC22974           | 4.27  | 2.09  | 987.43      | 4217.16 | 2016.93 | basic blue copper protein [Cicer arietinum]                           |
| Les.3299.1.S1_at         | BI933484          | TC23916           | 4.23  | 2.28  | 60.96       | 257.62  | 113.11  | unknown                                                               |
| LesAffx.30544.1.A1_at    | AI489986          | TC24194           | 3.96  | 2.13  | 427.35      | 1691.92 | 794.28  | unnamed protein product [Vitis vinifera]                              |

|                       |            |         |      |      |         |         |         |                                                                          |
|-----------------------|------------|---------|------|------|---------|---------|---------|--------------------------------------------------------------------------|
| LesAffx.56130.1.S1_at | AW220490   | TC24108 | 3.88 | 2.51 | 158.73  | 615.87  | 245.37  | unnamed protein product [Vitis vinifera]                                 |
| Les.3972.1.S1_at      | AJ243340.1 | TC22219 | 3.79 | 2.35 | 1093.82 | 4144.21 | 1761.08 | expansin9 [Solanum lycopersicum]                                         |
| Les.4527.1.S1_at      | AJ635323.1 | TC22837 | 3.72 | 2.78 | 32.68   | 121.72  | 43.78   | polyphenol oxidase A [Solanum lycopersicum]                              |
| LesAffx.47221.1.S1_at | AW033464   | AW03346 | 3.69 | 2.33 | 1055.85 | 3893.21 | 1671.76 | unknown                                                                  |
| LesAffx.62669.1.S1_at | AW442297   | TC22170 | 3.62 | 2.1  | 217.24  | 786.86  | 374.61  | LOB domain protein 1, putative [Solanum demissum]                        |
| LesAffx.56596.1.S1_at | AW036395   | AW03639 | 3.46 | 4.04 | 43.62   | 151.14  | 37.4    | unnamed protein product [Vitis vinifera]                                 |
| LesAffx.62570.2.S1_at | CD003040   | TC24016 | 3.46 | 2.52 | 137.49  | 476.04  | 188.59  | Generic methyltransferase [Medicago truncatula]                          |
| LesAffx.36837.1.S1_at | AI780027   | TC23516 | 3.24 | 2.84 | 107.67  | 348.35  | 122.62  | unnamed protein product [Vitis vinifera]                                 |
| LesAffx.57437.2.S1_at | AW621893   | TC23850 | 3.16 | 3.1  | 71.04   | 224.38  | 72.47   | salicylic acid-binding protein 2 [Nicotiana tabacum]                     |
| LesAffx.53517.1.S1_at | AI773309   | TC23424 | 3.11 | 2.01 | 1062    | 3299.77 | 1645.64 | peroxidase [Nicotiana tabacum]                                           |
| LesAffx.10091.1.S1_at | AI487223   | TC23911 | 3.05 | 2.05 | 156.42  | 477.66  | 233.04  | hypothetical protein [Vitis vinifera]                                    |
| Les.214.1.S1_at       | AJ278331.1 | TC21776 | 3.03 | 3.06 | 240.89  | 729.83  | 238.25  | putative 12-oxophytodienoate reductase 2 [Solanum lycopersicum]          |
| LesAffx.62933.1.S1_at | BE451393   | BM41100 | 3.02 | 3.15 | 527.61  | 1591.16 | 504.4   | inositol-1,4,5-triphosphate-5-phosphatase [Solanum lycopersicum]         |
| LesAffx.470.1.S1_at   | BI929841   | TC23763 | 2.91 | 2.1  | 84.54   | 245.86  | 116.88  | unnamed protein product [Vitis vinifera]                                 |
| Les.3042.2.S1_at      | AW934591   | BE46335 | 2.87 | 4.99 | 58.64   | 168.13  | 33.7    | hypothetical protein [Vitis vinifera]                                    |
| Les.1841.1.S1_at      | U72389.1   | TC22336 | 2.8  | 2.06 | 83.95   | 234.74  | 114.13  | l-aminocyclopropane-1-carboxylate synthase [Lycopersicon esculentum]     |
| Les.1431.1.A1_at      | BG631562   | TC23902 | 2.74 | 2.17 | 297.93  | 816.63  | 376.32  | unknown                                                                  |
| Les.3630.1.S1_at      | U50985.1   | TC21720 | 2.73 | 4.6  | 82.18   | 224.43  | 48.78   | pectin esterase [Lycopersicon esculentum]                                |
| Les.5855.1.S1_at      | BT014384.1 | TC22983 | 2.72 | 3.17 | 1523.49 | 4138.73 | 1305.81 | hypothetical protein [Vitis vinifera]                                    |
| LesAffx.24637.1.S1_at | CN550618   | TC22796 | 2.71 | 4.5  | 275.88  | 748.34  | 166.48  | unnamed protein product [Vitis vinifera]                                 |
| LesAffx.69609.1.S1_at | AW929283   | TC23404 | 2.66 | 2.71 | 211.3   | 562.96  | 207.57  | salicylic acid/benzoic acid carboxyl methyltransferase [Datura wrightii] |
| LesAffx.62138.1.S1_at | AW737374   | TC24364 | 2.63 | 2.7  | 110.1   | 289.36  | 107.14  | myb-related transcription factor Cpm10 [Craterostigma plantagineum]      |
| Les.726.1.S1_at       | BG627133   | TC24162 | 2.58 | 2.39 | 1068.14 | 2751.48 | 1152.21 | Myosin heavy chain-like protein, putative [Solanum demissum]             |
| LesAffx.295.2.S1_at   | AI772896   | TC22228 | 2.57 | 2.1  | 1020.61 | 2624.98 | 1250.44 | cytochrome P450-dependent fatty acid hydroxylase [Nicotiana tabacum]     |
| LesAffx.56802.1.S1_at | BI423210   | TC21932 | 2.54 | 2.64 | 894.06  | 2268.16 | 858.64  | hypothetical protein [Vitis vinifera]                                    |
| LesAffx.63659.1.S1_at | BI921813   | TC22794 | 2.53 | 2.47 | 379.53  | 962.09  | 389.26  | photoperiod responsive protein [Solanum tuberosum subsp. andigena]       |
| LesAffx.50112.1.S1_at | AI898985   | TC23361 | 2.49 | 2.45 | 523.6   | 1305.03 | 531.96  | photoperiod responsive protein [Solanum tuberosum subsp. andigena]       |
| LesAffx.57010.1.S1_at | AI898096   | TC21847 | 2.47 | 2.59 | 335.58  | 828.31  | 320.33  | unnamed protein product [Vitis vinifera]                                 |
| Les.3122.1.S1_a_at    | BT013364.1 | TC21726 | 2.44 | 3.5  | 44.25   | 107.99  | 30.86   | pectin esterase [Lycopersicon esculentum]                                |
| LesAffx.51641.1.S1_at | BM535284   | TC23056 | 2.34 | 2.48 | 49.64   | 116.16  | 46.79   | integral membrane protein [Beta vulgaris]                                |
| LesAffx.19424.1.S1_at | BG128567   | DB72515 | 2.29 | 2.46 | 161.34  | 368.85  | 149.91  | unknown                                                                  |
| LesAffx.65068.1.A1_at | CK716006   | DV10465 | 2.29 | 2.13 | 564.47  | 1290.17 | 606.5   | cytochrome P450 [Petunia x hybrida]                                      |
| Les.3403.2.S1_at      | BI925376   | TC22472 | 2.27 | 2.09 | 1151.11 | 2609.09 | 1248.36 | Protein phosphatase 2C-like [Medicago truncatula]                        |
| Les.4718.1.S1_at      | BT013487.1 | BI92390 | 2.25 | 3.27 | 180.74  | 406.87  | 124.31  | unknown                                                                  |
| Les.3486.1.S1_at      | AF416289.1 | TC22056 | 2.25 | 2.41 | 909.69  | 2043.41 | 846.89  | auxin-regulated protein [Lycopersicon esculentum]                        |
| LesAffx.49935.1.S1_at | BF097557   | TC23282 | 2.19 | 2.98 | 945.35  | 2067.63 | 694.82  | pyruvate decarboxylase [Solanum tuberosum]                               |

|                  |          |         |      |      |         |         |         |              |
|------------------|----------|---------|------|------|---------|---------|---------|--------------|
| Les.2504.1.A1_at | BG628687 | TC23404 | 2.16 | 2.58 | 576.19  | 1244.32 | 482.77  | unknown      |
| Les.3632.1.S1_at | U37840.1 | TC21802 | 2.08 | 2.92 | 1593.72 | 3319.2  | 1135.43 | lipoxygenase |

***Down regulated (39)***

|                       |            |         |      |      |         |         |         |                                                                        |
|-----------------------|------------|---------|------|------|---------|---------|---------|------------------------------------------------------------------------|
| LesAffx.59706.1.S1_at | BI204252   | TC23189 | 0.5  | 0.42 | 160.07  | 79.39   | 189.88  | unnamed protein product [Vitis vinifera]                               |
| Les.1492.2.A1_at      | BG626068   | TC22441 | 0.49 | 0.37 | 316.16  | 155.07  | 423.82  | unknown                                                                |
| Les.1230.1.A1_at      | BG630221   | GO37582 | 0.49 | 0.48 | 1251.09 | 612.23  | 1264.97 | unknown                                                                |
| Les.228.1.S1_at       | CK714929   | TC23208 | 0.49 | 0.45 | 6130.51 | 2987.25 | 6619.26 | putative proline-rich protein [Lycopersicon esculentum]                |
| Les.1762.1.S1_at      | AI780683   | TC22523 | 0.49 | 0.27 | 275.64  | 134.09  | 488.28  | H-protein [Flaveria cronquistii]                                       |
| Les.4769.1.S1_at      | BT012708.1 | TC21756 | 0.49 | 0.44 | 1313.85 | 639.13  | 1459.83 | expansin-like protein precursor [Lycopersicon esculentum]              |
| Les.46.1.S1_at        | X60760.1   | NP00035 | 0.49 | 0.3  | 148.15  | 71.98   | 238.13  | TDR8 [Solanum lycopersicum]                                            |
| LesAffx.70088.1.S1_at | BI924873   | TC22069 | 0.48 | 0.5  | 960.68  | 461.9   | 917.69  | unknown                                                                |
| LesAffx.24799.2.S1_at | BI209670   | TC24255 | 0.48 | 0.46 | 986.48  | 472.36  | 1037.1  | unnamed protein product [Vitis vinifera]                               |
| LesAffx.69296.1.S1_at | AW092917   | TC22654 | 0.47 | 0.46 | 2841.7  | 1334.34 | 2876.58 | unnamed protein product [Vitis vinifera]                               |
| LesAffx.64757.1.S1_at | AI490042   | TC22570 | 0.46 | 0.42 | 999.17  | 464.07  | 1100.56 | unknown [Solanum tuberosum]                                            |
| LesAffx.53966.1.S1_at | AY026037.1 | TC23466 | 0.46 | 0.21 | 922.28  | 424.38  | 1999.71 | glycine-rich protein TomR2 [Lycopersicon esculentum]                   |
| LesAffx.26489.1.S1_at | AW041597   | TC21998 | 0.45 | 0.49 | 1050.24 | 476.88  | 983     | chloroplast ribosomal protein L17 [Nicotiana tabacum]                  |
| Les.119.1.S1_at       | AF218774.1 | TC21978 | 0.45 | 0.47 | 1243.06 | 562.3   | 1198.07 | putative water channel protein [Lycopersicon esculentum]               |
| Les.4412.1.A1_at      | BG627732   | TC23503 | 0.45 | 0.5  | 1315.17 | 592.24  | 1187.84 | unnamed protein product [Vitis vinifera]                               |
| Les.4459.1.S1_s_at    | X99148.1   | ES89373 | 0.45 | 0.27 | 1247.7  | 555.84  | 2037.58 | putative arabinogalactan-protein [Solanum lycopersicum]                |
| LesAffx.6110.1.S1_at  | BF098450   | TC22721 | 0.44 | 0.24 | 79.16   | 34.47   | 141.37  | hypothetical protein [Vitis vinifera]                                  |
| Les.24.1.S1_at        | AF191823.1 | TC21735 | 0.42 | 0.49 | 473.73  | 201.02  | 410.44  | alpha-galactosidase [Lycopersicon esculentum]                          |
| LesAffx.63489.1.S1_at | BI921137   | TC22082 | 0.42 | 0.5  | 654.36  | 276.9   | 555.19  | unnamed protein product [Vitis vinifera]                               |
| Les.1721.2.S1_at      | BF113580   | TC22831 | 0.41 | 0.37 | 140.69  | 58.04   | 156.6   | expressed protein [Oryza sativa (japonica cultivar-group)]             |
| LesAffx.29104.1.S1_at | AW096456   | TC21791 | 0.39 | 0.38 | 938.5   | 368.99  | 964.82  | hypothetical protein OsI_008518 [Oryza sativa (indica cultivar-group)] |
| LesAffx.37344.1.S1_at | AI897449   | TC21881 | 0.39 | 0.26 | 471.68  | 185.18  | 700.33  | acetyljalman acetylerase [Rauvolfia serpentina]                        |
| Les.3594.1.S1_at      | Z47980.1   | TC21807 | 0.39 | 0.25 | 2402.16 | 927.9   | 3702.33 | unknown                                                                |
| LesAffx.64062.1.S1_at | AW040768   | TC22080 | 0.38 | 0.44 | 133.11  | 50.74   | 114.2   | germin-like protein [Capsicum chinense]                                |
| LesAffx.105.1.S1_at   | CK715483   | TC22543 | 0.38 | 0.25 | 184.61  | 69.65   | 276.45  | unnamed protein product [Vitis vinifera]                               |
| LesAffx.33890.1.S1_at | BG134582   | TC22584 | 0.37 | 0.32 | 160.45  | 60.11   | 190.11  | unnamed protein product [Vitis vinifera]                               |
| Les.3995.1.S1_at      | AW443014   | TC21771 | 0.37 | 0.29 | 2367    | 882.06  | 3091.19 | methionine rich arabinogalactan [Solanum lycopersicum]                 |
| Les.2286.1.S1_at      | BT013195.1 | TC22726 | 0.37 | 0.4  | 2309.24 | 855.95  | 2166.58 | unnamed protein product [Vitis vinifera]                               |
| Les.144.1.S1_at       | Z75519.1   | TC22816 | 0.35 | 0.34 | 600.28  | 208.98  | 607.78  | unknown [Solanum lycopersicum]                                         |
| Les.3436.2.S1_a_at    | CN385216   | TC22872 | 0.34 | 0.39 | 9345.71 | 3173.89 | 8087.23 | metallocarboxypeptidase inhibitor [Solanum tuberosum]                  |
| Les.479.1.S1_at       | AY509122.1 | TC22844 | 0.33 | 0.31 | 418.47  | 137.28  | 439.55  | arachidonic acid-induced DEA1 [Lycopersicon esculentum]                |

|                       |            |         |      |      |         |        |         |                                                                               |
|-----------------------|------------|---------|------|------|---------|--------|---------|-------------------------------------------------------------------------------|
| Les.3065.1.S1_at      | BI929558   | TC22543 | 0.32 | 0.5  | 965.19  | 309.75 | 618.07  | squamosa promoter binding protein-like protein [Capsicum annuum]              |
| Les.208.1.S1_at       | U44386.1   | TC22299 | 0.31 | 0.45 | 2359.05 | 739.17 | 1642.75 | ORF                                                                           |
| LesAffx.53591.1.S1_at | AI899018   | TC22292 | 0.31 | 0.5  | 390.02  | 121.56 | 242.3   | methyl jasmonate induced MYB-related transcription factor [Nicotiana tabacum] |
| Les.3620.1.S1_at      | L26295.1   | TC21804 | 0.31 | 0.47 | 335.2   | 102.7  | 220.81  | TAG1                                                                          |
| Les.4896.1.S1_at      | BT012857.1 | TC23109 | 0.28 | 0.25 | 2173.94 | 609.73 | 2404.3  | allergen-like protein BRSn20 [Sambucus nigra]                                 |
| LesAffx.26180.1.S1_at | BG132890   | BG13289 | 0.21 | 0.37 | 272.21  | 58.23  | 158.97  | hypothetical protein [Vitis vinifera]                                         |
| Les.2460.1.S1_at      | AW218727   | TC22357 | 0.16 | 0.12 | 1966.34 | 313.46 | 2614.26 | specific tissue protein 2 [Cicer arietinum]                                   |
| Les.4493.3.S1_at      | CN385077   | TC23105 | 0.16 | 0.48 | 595.29  | 94.18  | 194.7   | hypothetical protein [Plantago major]                                         |

---
